# Supplementary material for: Identification of long-term survival-associated gene in breast cancer
Source: publisher site journal article supplement (doi:10.18632/aging.103807), 2020-10-20
Supplement: Supplementary file [file aging-v12i20-103807-supplementary-material-SD1.pdf]

SUPPLEMENTARY FIGURE

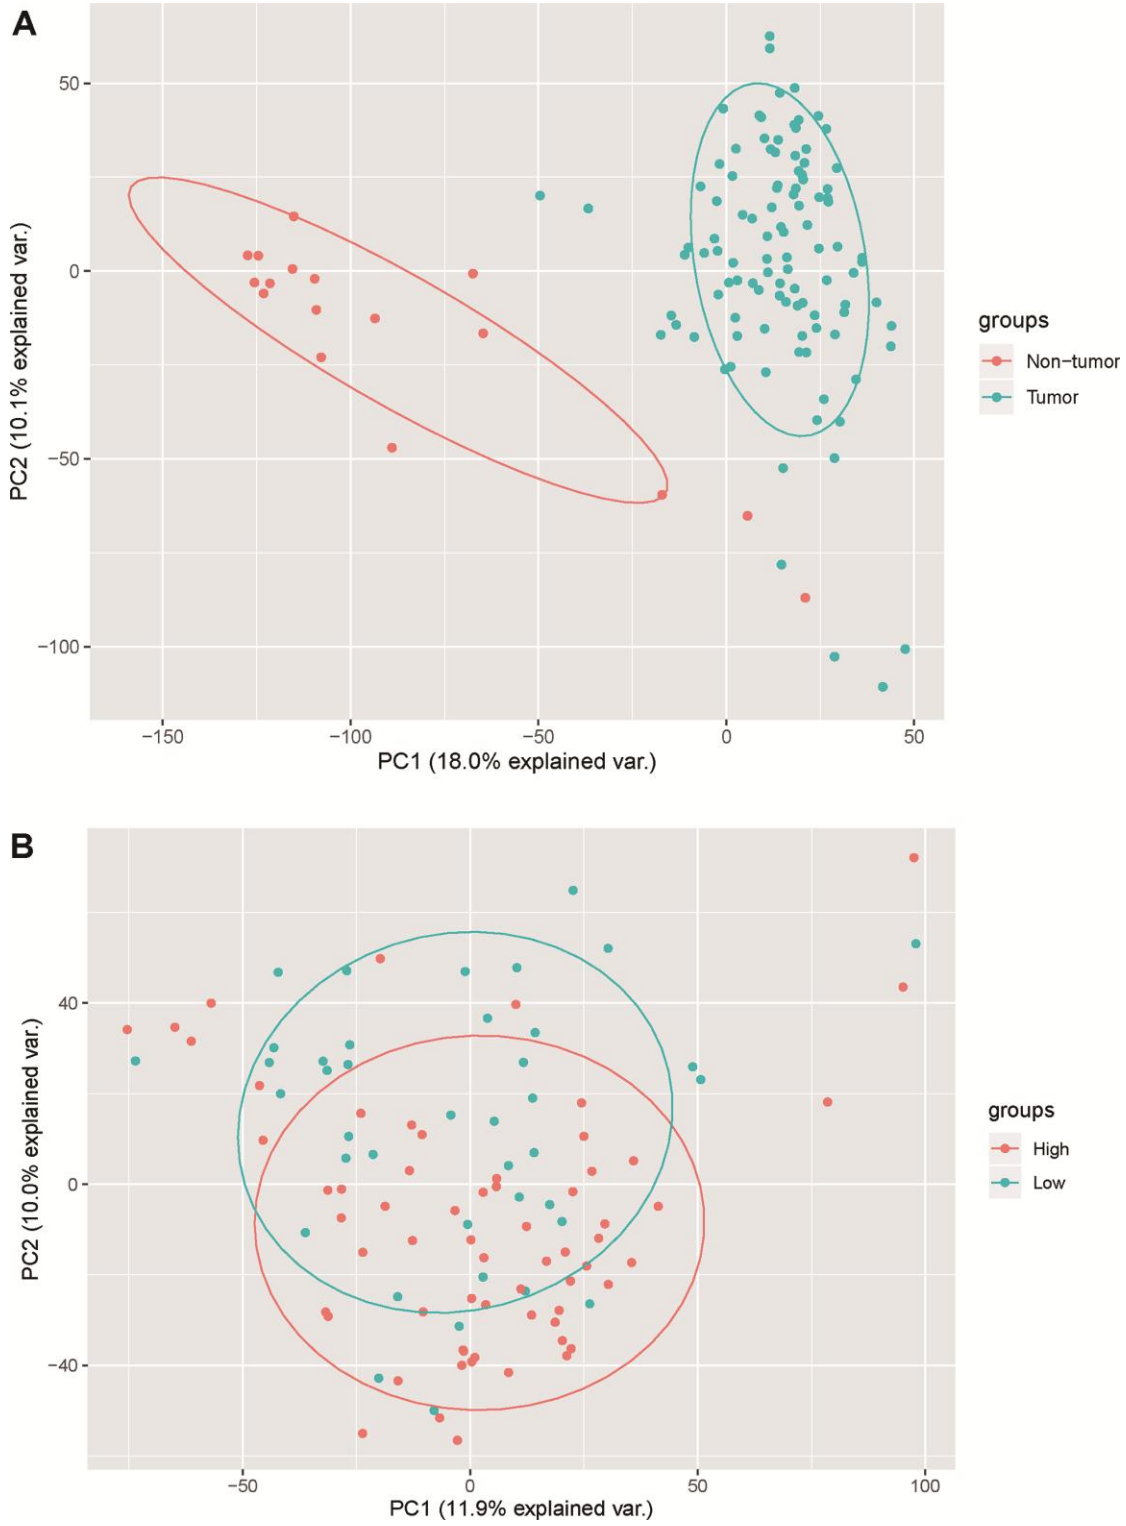

**Supplementary Figure 1. PCA analysis of all samples in the GSE42568 data. (A)** PCA of breast cancer samples and healthy control samples. **(B)** PCA of breast cancer patients with survival time greater than 5 years and less than 5 years.
