# Supplementary material for: Identification of long-term survival-associated gene in breast cancer
Source: Aging (Albany NY). 2020 Oct 20;12(20):20332–49. doi: 10.18632/aging.103807 (PMC7655188; doi:10.18632/aging.103807)
Supplement: Supplementary Table 1 [file aging-12-103807-s002..xlsx]

## Sheet: Sheet1
Supplementary Table 1. Differentially expressed genes (DEGs) between breast cancer patients and controls (pair).
DEG	logFC	AveExpr	t	P.Value	adj.P.Val	B
EPCAM	5.15644	11.1997	12.0106	2.55268e-22	2.35283e-20	40.1705
DSP	4.9778	9.77596	14.0721	3.52794e-27	6.16998e-25	51.2626
KRT18	4.92378	10.2772	10.9634	8.2288e-20	5.08694e-18	34.4457
SDC1	4.49563	7.23639	12.5719	1.17662e-23	1.33016e-21	43.221
S100P	4.35355	7.4815	6.68221	7.76588e-10	1.07559e-08	11.7599
RAB25	4.22469	7.59066	11.409	7.01852e-21	5.11078e-19	36.8854
SPINT2	4.19893	10.3919	14.051	3.94881e-27	6.67773e-25	51.1509
RRM2	4.16918	7.64841	9.68303	9.63661e-17	3.79931e-15	27.4474
C15orf48	4.14066	8.12427	8.01718	7.98766e-13	1.77463e-11	18.5299
ZG16B	4.03354	7.65331	7.80562	2.44191e-12	5.05732e-11	17.4279
GATA3	3.99117	9.69873	7.93234	1.25163e-12	2.71589e-11	18.0869
KRT8	3.97874	10.1464	11.0698	4.56948e-20	2.97773e-18	35.0286
ESRP1	3.95917	7.11088	12.4094	2.86319e-23	3.00444e-21	42.3394
TMC4	3.89449	7.39955	9.16691	1.62888e-15	5.34136e-14	24.6498
PRSS8	3.85329	6.96018	11.3544	9.48669e-21	6.81111e-19	36.5867
CD24	3.84955	10.2417	9.46225	3.23786e-16	1.1916e-14	26.248
PAFAH1B3	3.83644	8.10704	12.3511	3.93955e-23	3.97099e-21	42.023
CDC20	3.82126	6.75151	10.1952	5.73626e-18	2.69404e-16	30.2408
COL11A1	3.79511	6.38191	7.90712	1.43006e-12	3.07697e-11	17.9555
EZH2	3.75139	6.70037	11.7673	9.73539e-22	7.87373e-20	38.8435
AGR2	3.74003	7.76596	5.67382	9.8241e-08	9.28029e-07	7.02627
UHRF1	3.57994	6.88579	12.5628	1.23718e-23	1.38334e-21	43.1713
COL10A1	3.5775	6.56438	8.41989	9.31348e-14	2.35857e-12	20.6509
FOXA1	3.56691	6.02132	6.87653	2.93616e-10	4.41762e-09	12.7146
GALNT6	3.56566	6.17689	8.40454	1.01137e-13	2.54737e-12	20.5695
SYNE4	3.53197	6.29278	9.70984	8.31581e-17	3.30404e-15	27.5933
AP1M2	3.51172	6.40172	9.63224	1.27386e-16	4.91804e-15	27.1712
CREB3L4	3.47668	7.22101	8.58208	3.89202e-14	1.06327e-12	21.5127
COMP	3.43359	6.36961	7.28091	3.74809e-11	6.47201e-10	14.7381
PRC1	3.40302	6.51129	8.45369	7.7675e-14	1.99171e-12	20.8302
MLPH	3.39189	8.94006	5.38616	3.62872e-07	3.04307e-06	5.75513
S100A14	3.3254	6.26388	8.23434	2.51528e-13	6.03373e-12	19.6701
SMIM22	3.27656	6.43193	7.40448	1.9813e-11	3.56564e-10	15.3655
SERPINA3	3.27575	9.94294	5.18582	8.81615e-07	6.83319e-06	4.89372
LOC100272216	3.26629	8.80013	11.1978	2.25304e-20	1.53673e-18	35.7294
ANKRD30A	3.23974	7.43265	3.86302	0.000181922	0.000853793	-0.221971
MMP1	3.22699	5.8569	4.75211	5.62963e-06	3.72072e-05	3.10151
GINS1	3.22428	6.57139	10.1596	6.98158e-18	3.25415e-16	30.0462
CHMP4C	3.15607	7.0668	8.25079	2.30371e-13	5.5457e-12	19.7568
SYTL1	3.14117	6.16078	9.39341	4.72151e-16	1.70391e-14	25.8748
TMEM125	3.13473	5.73888	8.91273	6.50078e-15	1.97651e-13	23.2813
MUC1	3.11167	7.17743	7.45343	1.53754e-11	2.82162e-10	15.6152
TPD52	3.07756	7.22553	10.0874	1.03967e-17	4.78062e-16	29.6519
CRABP2	3.07681	9.2004	6.64227	9.47088e-10	1.29282e-08	11.5651
NUSAP1	3.0559	6.57569	9.65388	1.13107e-16	4.40001e-15	27.2888
CEACAM6	3.05135	6.13183	4.28545	3.69758e-05	0.000205765	1.29438
CLDN3	3.03627	6.96099	6.73485	5.97358e-10	8.42975e-09	12.0173
TFF1	3.03519	8.08632	3.35341	0.00106799	0.0041665	-1.88556
MARCKSL1	3.00076	9.12043	10.9324	9.76285e-20	5.92781e-18	34.2763
LSR	2.97634	7.25246	10.5121	9.96686e-19	5.25623e-17	31.9743
AGR3	2.95939	7.29237	3.44128	0.000796942	0.00321511	-1.61232
PTTG1	2.9401	7.30046	8.1914	3.16296e-13	7.48414e-12	19.4439
BSPRY	2.90699	7.05793	9.28502	8.54455e-16	2.96336e-14	25.288
GJB2	2.89324	5.6094	6.37494	3.5283e-09	4.32831e-08	10.2761
SFN	2.88304	8.49716	9.47558	3.00975e-16	1.11165e-14	26.3203
MARVELD2	2.87424	7.00729	10.8498	1.54119e-19	9.14084e-18	33.8238
EFHD1	2.871	9.04385	6.03435	1.81817e-08	1.97785e-07	8.67219
IRX5	2.86629	7.68182	6.81882	3.92412e-10	5.74358e-09	12.4298
ZWINT	2.8579	8.16528	9.49242	2.74427e-16	1.02283e-14	26.4117
MELK	2.85455	6.81453	7.45242	1.54569e-11	2.8315e-10	15.6099
HOOK1	2.84312	6.40563	11.0327	5.61036e-20	3.53228e-18	34.8252
APOBEC3B	2.80386	6.2718	6.87299	2.98882e-10	4.48366e-09	12.6971
CCNB1	2.80317	6.74554	8.54827	4.66975e-14	1.25727e-12	21.3328
UBE2C	2.78691	7.89743	8.34104	1.42154e-13	3.50467e-12	20.2334
CGN	2.78141	5.77288	9.2653	9.5172e-16	3.28954e-14	25.1813
CDH3	2.77432	6.72569	5.67414	9.80953e-08	9.27125e-07	7.02771
RHPN2	2.75654	7.57671	7.86607	1.77598e-12	3.75802e-11	17.7419
SLC7A5	2.75594	6.78556	5.75498	6.75084e-08	6.6062e-07	7.39187
KRT19	2.75	6.7352	9.32979	6.68854e-16	2.34351e-14	25.5302
LTF	2.73751	8.80091	3.46118	0.000745262	0.00303353	-1.54962
TRPS1	2.73418	8.74168	8.97486	4.63791e-15	1.44226e-13	23.6151
VTCN1	2.72621	7.31859	5.09952	1.28463e-06	9.65689e-06	4.529
EPPK1	2.71568	5.57518	9.98044	1.87483e-17	8.19715e-16	29.068
IRX3	2.71535	10.4814	7.78532	2.71718e-12	5.57103e-11	17.3226
CKS2	2.7092	9.20249	8.27372	2.03799e-13	4.94678e-12	19.8778
INHBA	2.70474	6.21368	10.7421	2.79608e-19	1.60261e-17	33.2336
SOX9	2.69698	6.4998	7.28281	3.71149e-11	6.41424e-10	14.7478
CXCL10	2.6885	5.43404	4.66069	8.21802e-06	5.27236e-05	2.73719
PRR15L	2.68434	6.15615	7.02298	1.40037e-10	2.20757e-09	13.442
PRKCZ	2.68367	6.29249	14.3122	9.80668e-28	1.92946e-25	52.5314
LINC00993	2.68197	7.71847	3.39278	0.000937295	0.00371541	-1.76383
TOP2A	2.66734	6.02547	8.88685	7.48174e-15	2.25134e-13	23.1423
CEP55	2.64434	5.46105	6.7962	4.39535e-10	6.37855e-09	12.3185
STAP2	2.64425	7.1368	10.0662	1.1688e-17	5.3265e-16	29.5359
GRHL2	2.6377	7.85987	11.8662	5.64931e-22	4.81651e-20	39.383
MAPK13	2.62899	6.35581	9.41062	4.29671e-16	1.5644e-14	25.9681
EFNA1	2.61568	9.08869	9.51834	2.38058e-16	8.93788e-15	26.5524
BUB1B	2.59266	5.21113	7.17586	6.42469e-11	1.06967e-09	14.208
KIAA0101	2.59256	7.03629	10.6103	5.79119e-19	3.15998e-17	32.5122
KIAA1522	2.59239	7.1416	9.53166	2.21283e-16	8.33865e-15	26.6247
ATP1B1	2.58845	10.8695	7.16055	6.94812e-11	1.14655e-09	14.131
MMP9	2.57995	7.22279	4.269	3.94229e-05	0.000217784	1.23313
MB	2.56118	6.83288	6.8509	3.34009e-10	4.94627e-09	12.588
C11orf80	2.54911	5.71867	10.3136	2.98405e-18	1.43332e-16	30.8881
HIST1H2BD	2.53953	6.96384	6.51963	1.73657e-09	2.26186e-08	10.9707
GALNT7	2.53583	7.39683	6.86814	3.06275e-10	4.58115e-09	12.6731
HOXC10	2.53458	5.76043	5.75099	6.87719e-08	6.70358e-07	7.3738
ELF3	2.51724	6.42546	9.09072	2.46812e-15	7.94068e-14	24.2388
BAMBI	2.51285	7.59239	5.41317	3.21475e-07	2.72947e-06	5.87282
PPAP2C	2.51108	6.09328	7.83709	2.06913e-12	4.33352e-11	17.5912
EPN3	2.5106	5.80275	7.24579	4.48948e-11	7.63258e-10	14.5606
SLITRK6	2.49905	5.38416	3.79278	0.000234559	0.00107421	-0.462377
MCM2	2.49711	6.80281	9.10297	2.30866e-15	7.46285e-14	24.3049
CAPN8	2.4908	6.13756	4.24644	4.30312e-05	0.000235807	1.14945
PPP1R13L	2.48745	5.46799	8.88858	7.41186e-15	2.2336e-13	23.1516
CDH1	2.48384	6.32618	10.6476	4.71328e-19	2.60657e-17	32.7163
FAM83D	2.47518	5.05233	6.61738	1.0715e-09	1.4472e-08	11.4441
NUF2	2.47034	5.41379	6.62953	1.00885e-09	1.37072e-08	11.5032
SDC4	2.46688	9.1334	9.05517	2.9956e-15	9.57749e-14	24.0473
SLC38A1	2.46568	6.93841	10.5183	9.63044e-19	5.11839e-17	32.0084
MDK	2.46472	6.50004	6.46772	2.24129e-09	2.85919e-08	10.7206
ISG15	2.46444	10.2836	5.95818	2.60795e-08	2.74788e-07	8.31984
CHTF18	2.45681	6.00499	10.3781	2.08932e-18	1.04019e-16	31.2411
PAQR4	2.44704	5.98328	9.70074	8.74256e-17	3.46016e-15	27.5438
TNNT1	2.43665	4.9891	4.13408	6.62712e-05	0.000347761	0.737412
EVL	2.436	7.54088	5.68772	9.21451e-08	8.77373e-07	7.08867
KIAA1324	2.43316	6.59048	6.18464	8.86529e-09	1.0174e-07	9.37436
IER3	2.42571	11.0069	8.21727	2.75518e-13	6.57835e-12	19.5802
ANKRD36B	2.42098	9.1113	8.1824	3.31833e-13	7.82253e-12	19.3966
BIK	2.41807	6.79226	6.9011	2.59428e-10	3.94971e-09	12.8362
SAPCD2	2.41237	5.71449	8.47096	7.07893e-14	1.83819e-12	20.9219
TPX2	2.39806	5.62478	6.68372	7.70766e-10	1.06972e-08	11.7672
SHISA2	2.38656	4.8725	4.0345	9.65469e-05	0.000487548	0.379213
KRTCAP3	2.38209	5.94423	6.85087	3.3407e-10	4.94627e-09	12.5878
FXYD3	2.38126	8.35603	7.57636	8.11451e-12	1.55032e-10	16.2446
KIF18B	2.38025	5.12856	7.66385	5.13798e-12	1.01382e-10	16.6948
S100A7	2.37668	4.35727	2.77754	0.00635624	0.0199023	-3.52726
ZNF692	2.35728	6.44572	11.1104	3.65107e-20	2.40219e-18	35.251
BAIAP2L1	2.3453	5.55707	8.18106	3.34223e-13	7.86077e-12	19.3895
TJP3	2.34517	5.74969	7.70609	4.11837e-12	8.22148e-11	16.9127
ARNT2	2.32382	4.82689	5.37653	3.78851e-07	3.16798e-06	5.71327
NAT14	2.32323	5.95519	9.49275	2.73932e-16	1.02283e-14	26.4135
LOC100190986	2.31807	7.27905	9.95455	2.16234e-17	9.33455e-16	28.9268
KIF20A	2.31398	5.28909	7.50723	1.16289e-11	2.18103e-10	15.8901
DTL	2.3111	5.63055	8.92489	6.08537e-15	1.8605e-13	23.3466
SBK1	2.30861	5.72715	8.52823	5.20179e-14	1.39501e-12	21.2262
FANK1	2.29945	5.99814	6.52763	1.66943e-09	2.18207e-08	11.0093
WDR34	2.29805	8.04919	11.8019	8.04757e-22	6.7212e-20	39.0322
TOX3	2.29281	5.81589	5.46851	2.50567e-07	2.17527e-06	6.11503
LOC102724356	2.27908	7.84981	6.36635	3.67906e-09	4.50515e-08	10.2351
SLC12A8	2.2658	5.82859	7.20396	5.56389e-11	9.33948e-10	14.3495
FOXO6	2.25949	6.18324	7.94736	1.15607e-12	2.52729e-11	18.1652
ORC6	2.23228	6.85945	7.60315	7.05615e-12	1.35826e-10	16.3822
SLC9A3R1	2.2314	8.98585	6.95925	1.93417e-10	3.00281e-09	13.1246
C19orf33	2.23031	7.165	3.68235	0.000347495	0.00153242	-0.833259
FAM110C	2.22729	5.95181	5.40617	3.31742e-07	2.80964e-06	5.84227
MYO5C	2.22484	7.55796	7.1037	9.28772e-11	1.5071e-09	13.8456
ERP27	2.20823	5.72768	4.57657	1.15931e-05	7.22348e-05	2.40627
STIL	2.20712	7.11531	9.20918	1.29322e-15	4.29577e-14	24.878
CTHRC1	2.20488	10.5813	5.78366	5.90879e-08	5.84086e-07	7.52176
VAV3	2.20408	5.92838	8.04742	6.80371e-13	1.54172e-11	18.6881
POTEM	2.20384	5.05365	4.07641	8.24688e-05	0.000422715	0.529153
TTK	2.2025	4.94258	6.95187	2.00765e-10	3.1051e-09	13.088
ENC1	2.19765	5.73127	7.89228	1.54662e-12	3.29999e-11	17.8782
FLNB	2.19135	7.94928	7.76407	3.03812e-12	6.19183e-11	17.2126
TRIP13	2.18776	5.81685	5.73021	7.57226e-08	7.33634e-07	7.27995
RAD51AP1	2.17618	5.90164	6.90979	2.48299e-10	3.79723e-09	12.8793
RAB26	2.15846	5.92676	6.7618	5.22119e-10	7.43983e-09	12.1494
HN1	2.14748	8.02883	7.33032	2.90593e-11	5.10554e-10	14.9885
CXADR	2.14073	5.59792	7.22082	5.103e-11	8.59617e-10	14.4345
LY6E	2.13579	7.03918	5.32901	4.6834e-07	3.85331e-06	5.50735
TFF3	2.13289	7.94339	2.88682	0.00461525	0.0151051	-3.23615
HIST2H2BE	2.12597	6.92932	4.3682	2.67235e-05	0.000153687	1.60507
STC2	2.12394	6.1443	3.71387	0.000310871	0.00138525	-0.728287
GPRC5A	2.11638	5.73833	6.32448	4.51038e-09	5.43529e-08	10.0356
ASPM	2.11221	5.14141	7.03934	1.28871e-10	2.04573e-09	13.5237
EFCAB4A	2.09836	6.43532	5.77816	6.06196e-08	5.98071e-07	7.49681
HMGB3	2.09245	6.46859	7.06293	1.14309e-10	1.82877e-09	13.6415
DLGAP5	2.08256	5.05808	6.1709	9.47022e-09	1.08076e-07	9.3098
PKIB	2.07925	5.33256	4.60919	1.01495e-05	6.40592e-05	2.53411
FAM60A	2.07705	6.52907	7.16922	6.64682e-11	1.10038e-09	14.1746
EFNA4	2.07653	6.77099	7.85075	1.92541e-12	4.05326e-11	17.6622
WDR54	2.07603	6.34545	7.37242	2.33847e-11	4.16086e-10	15.2024
IFI6	2.07556	10.2355	4.36485	2.70792e-05	0.000155557	1.59241
CDCA3	2.06375	5.61451	6.90836	2.50105e-10	3.81914e-09	12.8721
UBE2T	2.057	5.18444	6.13104	1.14648e-08	1.28404e-07	9.1229
PRR15	2.05654	5.66831	5.10854	1.23531e-06	9.31699e-06	4.5669
KRT15	2.0557	7.88975	3.01995	0.00308838	0.010682	-2.86837
HNRNPU-AS1	2.05349	7.59899	7.60145	7.11893e-12	1.36649e-10	16.3735
CALML5	2.04741	4.60676	3.33173	0.00114702	0.00443421	-1.95205
TRIM59	2.0431	4.94074	7.67158	4.93443e-12	9.7554e-11	16.7346
STARD10	2.0422	6.82952	7.14754	7.42597e-11	1.2195e-09	14.0656
MYO6	2.03624	7.52651	8.629	3.02159e-14	8.38911e-13	21.7628
CLGN	2.034	4.52372	3.97785	0.000119271	0.000589496	0.178363
BMPR1B	2.03226	5.38025	3.50197	0.000649039	0.00268784	-1.42021
FLVCR1	2.03085	6.66122	10.4511	1.39632e-18	7.215e-17	31.6403
SOX4	2.01481	6.97457	12.5398	1.40224e-23	1.55938e-21	43.0471
LAMA5	2.00687	7.48423	8.49859	6.10163e-14	1.60272e-12	21.0686
ZBTB42	2.00308	5.5024	7.47127	1.40167e-11	2.59556e-10	15.7062
FAM213B	2.00258	7.36743	8.46594	7.27269e-14	1.87896e-12	20.8952
CDC25B	1.99772	6.27601	6.50555	1.8612e-09	2.41037e-08	10.9027
RUSC1	1.98955	6.57623	6.58447	1.26107e-09	1.68434e-08	11.2843
DHRS13	1.987	4.46919	6.21718	7.58005e-09	8.83778e-08	9.52757
NAT1	1.98661	8.10785	2.65605	0.00897866	0.0267309	-3.83926
TFAP2A	1.98602	5.20912	10.479	1.19649e-18	6.22967e-17	31.7933
FAM83H	1.98239	5.21637	13.1444	5.20985e-25	6.74709e-23	46.3114
RCC2	1.97921	9.05138	10.7993	2.0382e-19	1.18146e-17	33.5469
MAGED2	1.97903	8.26314	6.18745	8.74614e-09	1.00541e-07	9.3876
CXCL9	1.97601	7.21678	2.917	0.00421833	0.0139511	-3.15405
KIF4A	1.96872	4.65095	6.01627	1.98113e-08	2.13807e-07	8.58833
CYP4Z1	1.96867	5.47275	2.73907	0.00709923	0.0219003	-3.62737
LOC728061	1.96678	5.21405	7.16935	6.64242e-11	1.10038e-09	14.1752
SQLE	1.96073	5.42165	8.48025	6.73414e-14	1.75534e-12	20.9712
ATHL1	1.95978	7.15242	4.46818	1.79555e-05	0.000107397	1.9862
TK1	1.95379	5.11808	6.76369	5.17195e-10	7.37481e-09	12.1587
AURKA	1.95355	4.8325	9.43583	3.7425e-16	1.36993e-14	26.1047
KIF11	1.95316	5.29201	6.18767	8.73707e-09	1.00494e-07	9.38861
MYB	1.95212	4.70365	7.31728	3.108e-11	5.40781e-10	14.9224
CA12	1.94779	5.72677	4.98844	2.07432e-06	1.50141e-05	4.06535
SLC20A1	1.93911	7.42206	9.75669	6.42737e-17	2.61986e-15	27.8483
PDZK1IP1	1.93557	5.27987	4.2067	5.01764e-05	0.000270685	1.00276
MIF	1.93534	11.1331	8.45945	7.5308e-14	1.94074e-12	20.8608
RHOH	1.93389	5.47112	4.54761	1.30387e-05	8.05548e-05	2.29336
C1orf106	1.92962	5.3953	4.39165	2.43559e-05	0.00014146	1.69393
CYP2B7P	1.92325	4.27605	2.7715	0.00646793	0.0202042	-3.54305
RARRES3	1.92037	7.93707	4.67734	7.67354e-06	4.95631e-05	2.80317
JUP	1.9169	8.52038	8.5884	3.76156e-14	1.03037e-12	21.5464
MX1	1.91396	8.29902	3.90389	0.000156692	0.000749643	-0.0805325
OCIAD2	1.9129	8.44199	7.0331	1.33026e-10	2.1068e-09	13.4925
PIP	1.91095	9.81811	2.2256	0.0279054	0.0693971	-4.84334
TMEM97	1.91093	6.01776	7.03161	1.34033e-10	2.11946e-09	13.485
FAM110A	1.91002	5.60274	7.84173	2.01916e-12	4.2332e-11	17.6153
ANLN	1.90733	4.39481	6.82738	3.75908e-10	5.51782e-09	12.472
DEGS2	1.90659	5.49289	4.69408	7.16126e-06	4.6563e-05	2.86969
CCDC64B	1.90409	4.99074	8.30435	1.73006e-13	4.24466e-12	20.0395
IGFBP2	1.90322	4.50457	4.22865	4.60997e-05	0.000250809	1.08366
IRF7	1.90261	7.58931	6.80711	4.16139e-10	6.06483e-09	12.3722
MARVELD3	1.90211	5.47089	10.2434	4.39539e-18	2.09159e-16	30.5045
REEP1	1.90187	5.04153	4.37454	2.60619e-05	0.000150389	1.62908
ATP1A1	1.90183	10.1053	7.98119	9.66572e-13	2.12667e-11	18.3418
RAB15	1.8986	4.9292	8.23166	2.55152e-13	6.10635e-12	19.656
BEX2	1.89587	6.47195	4.39186	2.43361e-05	0.000141391	1.6947
DNMT1	1.89557	7.6876	10.0803	1.08114e-17	4.96015e-16	29.6131
LOC100505938	1.89394	5.04217	5.49072	2.26635e-07	1.98435e-06	6.21264
PKM	1.89273	7.36102	11.8745	5.39602e-22	4.61981e-20	39.4284
GPR160	1.89224	6.40792	3.98549	0.000115933	0.000575222	0.20532
PARP12	1.88704	7.59415	6.74825	5.58701e-10	7.92248e-09	12.083
SEMA4B	1.88589	6.85506	7.95925	1.0856e-12	2.37833e-11	18.2272
RASEF	1.88398	7.36419	8.03538	7.2526e-13	1.62844e-11	18.6251
SHROOM3	1.88159	5.35667	8.41239	9.69645e-14	2.44647e-12	20.6111
ENO2	1.8802	5.10364	4.79338	4.73893e-06	3.1971e-05	3.26755
ST14	1.87997	5.6836	9.90062	2.91044e-17	1.24329e-15	28.6326
RNF43	1.86819	5.75486	5.66346	1.03037e-07	9.68464e-07	6.97983
PVRL4	1.86493	5.04987	6.64872	9.17242e-10	1.25711e-08	11.5966
PSRC1	1.86386	5.68311	7.50467	1.17845e-11	2.20818e-10	15.8771
SLC16A6	1.86365	5.31902	4.85459	3.66456e-06	2.53068e-05	3.51559
RSPH1	1.86213	4.48205	5.41819	3.14315e-07	2.67423e-06	5.89471
SULF1	1.85833	7.39276	5.75324	6.8057e-08	6.64084e-07	7.38398
CDS1	1.85663	5.21595	10.6928	3.67036e-19	2.07467e-17	32.964
EHF	1.853	5.11242	5.9519	2.68639e-08	2.82617e-07	8.29091
PPP1R10	1.8517	6.0815	7.9263	1.29229e-12	2.80115e-11	18.0554
CTPS1	1.85017	5.3578	6.22096	7.44314e-09	8.69301e-08	9.5454
GTF2H2B	1.84265	5.86481	5.52575	1.93363e-07	1.71578e-06	6.36707
ELMO3	1.84193	4.25253	6.34308	4.12045e-09	4.99483e-08	10.1242
LRRC15	1.84057	4.60658	8.93515	5.75536e-15	1.76826e-13	23.4017
SLC39A6	1.8365	8.14469	3.97288	0.000121491	0.000599745	0.160851
NDC80	1.83556	5.42093	5.69974	8.7175e-08	8.3315e-07	7.1427
SORD	1.82699	5.91048	6.55554	1.45481e-09	1.928e-08	11.1442
SPINT1	1.81817	5.19099	8.03343	7.32794e-13	1.64233e-11	18.6149
KNOP1	1.81218	6.59258	11.1752	2.55268e-20	1.72386e-18	35.6056
ATP6AP1	1.80829	8.4227	5.84492	4.44042e-08	4.50918e-07	7.80041
TSTA3	1.80685	8.45863	7.76629	3.00291e-12	6.12618e-11	17.2241
EZR	1.80649	6.10777	9.25768	9.92192e-16	3.40839e-14	25.1401
CLDN7	1.80643	5.40607	6.3246	4.50761e-09	5.43516e-08	10.0362
GRP	1.79832	4.73001	4.49305	1.62499e-05	9.85495e-05	2.08196
FN1	1.79705	8.63868	6.74758	5.60563e-10	7.94339e-09	12.0797
LYPD6B	1.79519	5.3194	4.78793	4.8483e-06	3.2655e-05	3.24555
LMNB2	1.79201	5.48162	6.42463	2.76804e-09	3.4727e-08	10.5138
IRF6	1.78466	4.7562	8.34131	1.41949e-13	3.50467e-12	20.2348
MXRA5	1.78263	9.69918	5.91938	3.13131e-08	3.26403e-07	8.14129
KIFC2	1.77968	6.25973	6.12554	1.17703e-08	1.31609e-07	9.09719
ENPP5	1.77591	4.66461	4.04174	9.39609e-05	0.00047531	0.405031
CLSTN1	1.76827	8.22878	8.47055	7.0948e-14	1.83997e-12	20.9197
OVOL2	1.76387	5.25594	10.4022	1.82925e-18	9.21922e-17	31.3728
SLC39A4	1.76081	6.76499	4.55183	1.2818e-05	7.93114e-05	2.30976
SPHK1	1.75903	6.2828	5.6689	1.00491e-07	9.47139e-07	7.00421
PYCARD	1.75716	9.22806	5.32177	4.83674e-07	3.96353e-06	5.47608
PREX1	1.74405	6.66297	4.48065	1.70801e-05	0.000102762	2.03415
EIF3C	1.74057	4.24481	6.71834	6.48677e-10	9.09748e-09	11.9364
SLC52A2	1.73912	7.06852	6.82317	3.8394e-10	5.62764e-09	12.4512
NPNT	1.73757	4.48233	6.1984	8.29739e-09	9.59758e-08	9.43912
TSPAN13	1.73052	12.2451	7.60578	6.95996e-12	1.3448e-10	16.3957
LAMP3	1.72791	4.71471	3.46437	0.000737266	0.00300397	-1.53953
ZNF703	1.72439	8.47307	4.20924	4.96862e-05	0.000268395	1.01213
MICB	1.72332	5.80436	4.33885	2.99995e-05	0.000170751	1.49438
TRPM4	1.72121	5.44502	6.55674	1.44621e-09	1.91909e-08	11.15
SLC2A10	1.71907	7.9041	3.80956	0.000220808	0.00101738	-0.405264
GCH1	1.71695	7.02138	4.98063	2.14488e-06	1.54755e-05	4.03301
LRRC8E	1.71617	4.34045	7.31528	3.14027e-11	5.45468e-10	14.9122
MBOAT2	1.71373	6.27437	6.75075	5.51781e-10	7.83522e-09	12.0952
KPNA2	1.7119	9.23274	6.34161	4.14996e-09	5.02465e-08	10.1172
PDIA4	1.71073	8.08646	8.43569	8.55618e-14	2.18573e-12	20.7347
LIG1	1.70851	4.67141	9.24721	1.05062e-15	3.57701e-14	25.0835
PBK	1.70821	4.11775	5.21739	7.67512e-07	6.02641e-06	5.02809
GOT2	1.70701	8.45639	6.57453	1.32457e-09	1.76454e-08	11.2362
CACNB3	1.70307	6.06845	8.45516	7.70633e-14	1.98099e-12	20.838
IGSF9	1.70217	4.20667	6.39057	3.26921e-09	4.04931e-08	10.3508
ZNF587B	1.69676	7.24272	7.23092	4.84544e-11	8.20078e-10	14.4855
DLG5	1.69566	7.1895	5.43541	2.90889e-07	2.49462e-06	5.96998
RACGAP1	1.69331	7.9903	7.249	4.41589e-11	7.52355e-10	14.5768
TNFAIP8L1	1.68889	5.57226	7.20039	5.66649e-11	9.50391e-10	14.3315
HCP5	1.68844	5.54055	4.23769	4.45159e-05	0.000243097	1.11705
ERMP1	1.68817	7.21237	7.46597	1.44076e-11	2.65593e-10	15.6792
CENPF	1.68661	4.51267	9.11964	2.10804e-15	6.8468e-14	24.3948
PABPC1L	1.68647	4.52862	8.70148	2.04261e-14	5.79693e-13	22.1497
KIAA0895	1.68389	4.70695	6.42427	2.77293e-09	3.47669e-08	10.5121
RASGRP1	1.68249	5.28772	4.01293	0.000104665	0.000525431	0.302462
TLCD1	1.68224	4.96698	4.69322	7.18693e-06	4.66854e-05	2.86625
SLC39A11	1.68144	6.62557	5.48347	2.34193e-07	2.04526e-06	6.18074
RMI2	1.67993	5.21197	5.00029	1.97153e-06	1.4336e-05	4.1145
PGAP3	1.67718	6.30978	4.14391	6.38344e-05	0.000335952	0.773118
EPS8L1	1.67318	5.64834	8.82129	1.06778e-14	3.13921e-13	22.7907
LEPREL4	1.67033	7.11042	5.66867	1.00599e-07	9.47721e-07	7.00316
FARP1	1.6698	5.87239	8.84966	9.15497e-15	2.73074e-13	22.9428
PUS7	1.66835	6.75853	7.84191	2.01727e-12	4.2332e-11	17.6162
CDC7	1.66798	4.3575	5.47126	2.47481e-07	2.15017e-06	6.12708
BGN	1.66729	6.6467	7.73919	3.46216e-12	6.96585e-11	17.0838
DNAJC12	1.66651	5.14465	3.82193	0.000211164	0.000978227	-0.363032
SPDEF	1.66593	6.46992	6.44843	2.46356e-09	3.11882e-08	10.628
S100A2	1.66042	4.98233	2.91888	0.00419467	0.0138863	-3.14891
COL1A2	1.6604	11.1926	4.90519	2.95844e-06	2.08527e-05	3.72226
EGLN3	1.65969	5.06857	4.704	6.87366e-06	4.48355e-05	2.90916
SPAG5	1.65882	5.22525	6.66709	8.37219e-10	1.15564e-08	11.6861
VMP1	1.6587	7.6089	4.99349	2.02989e-06	1.47133e-05	4.08629
ERBB3	1.65803	4.76792	10.4364	1.51369e-18	7.78221e-17	31.5604
LLGL2	1.65633	4.58896	9.45299	3.40648e-16	1.25141e-14	26.1978
TNFRSF12A	1.65434	6.8251	5.08833	1.34857e-06	1.00967e-05	4.48197
HIST1H2BK	1.64977	9.12207	4.00296	0.000108631	0.000542636	0.267122
TYMP	1.64365	6.0227	6.34915	4.00041e-09	4.86083e-08	10.1531
FAM174B	1.64353	7.08254	6.18938	8.6653e-09	9.97241e-08	9.39668
TPBG	1.64206	6.53312	6.46055	2.32154e-09	2.94503e-08	10.6861
RECQL4	1.64154	5.5752	6.59634	1.18915e-09	1.59347e-08	11.3419
LMNB1	1.6414	5.49976	7.49133	1.26306e-11	2.35166e-10	15.8088
SORL1	1.63934	6.90238	6.2566	6.26669e-09	7.42496e-08	9.71374
KIAA1598	1.6386	8.30163	6.43082	2.68551e-09	3.37744e-08	10.5434
SH3RF1	1.63365	7.39797	6.97689	1.76895e-10	2.75465e-09	13.2124
LPCAT1	1.633	6.65299	6.22851	7.17701e-09	8.40618e-08	9.58103
TRIM45	1.62905	5.20647	6.68573	7.63084e-10	1.06003e-08	11.7771
SCRIB	1.62761	7.01691	7.29667	3.45612e-11	5.99315e-10	14.8179
MLLT11	1.62334	6.56686	5.85392	4.25752e-08	4.33205e-07	7.84145
MFSD10	1.62241	7.20768	6.48134	2.09631e-09	2.68932e-08	10.7861
LRRC1	1.62208	4.94076	9.99165	1.76257e-17	7.75606e-16	29.1292
SMA4	1.6216	6.13838	5.62971	1.20316e-07	1.11097e-06	6.82885
C9orf152	1.61782	4.28977	4.31502	3.29393e-05	0.000185932	1.40493
KIAA0247	1.61503	8.70175	7.75943	3.11303e-12	6.32559e-11	17.1886
CELSR2	1.61399	4.91575	5.07976	1.39961e-06	1.04331e-05	4.446
C1orf64	1.61379	5.09809	3.46655	0.00073186	0.00298373	-1.53265
SGK494	1.61366	4.63454	8.61865	3.1952e-14	8.8471e-13	21.7076
KIAA1244	1.61365	4.8815	6.00701	2.07004e-08	2.22933e-07	8.54545
SOX11	1.6121	3.78783	3.19627	0.00177883	0.00656181	-2.3595
POLD1	1.61116	5.51808	8.34348	1.40309e-13	3.47579e-12	20.2463
HOTAIR	1.60641	3.73389	4.12714	6.80445e-05	0.000356003	0.712247
PPP1R14B	1.60619	9.46771	6.87376	2.97725e-10	4.46959e-09	12.701
USP54	1.60286	5.74387	6.95488	1.97731e-10	3.06746e-09	13.103
BMS1P6	1.59912	5.12214	7.29253	3.53057e-11	6.11706e-10	14.7969
LRRN1	1.59565	4.01163	3.84363	0.000195207	0.000910699	-0.288693
LOC646014	1.59012	6.21159	6.71959	6.44638e-10	9.04703e-09	11.9426
CENPK	1.58407	4.5113	6.27675	5.68469e-09	6.77461e-08	9.80913
XPO1	1.58325	8.57205	9.74741	6.76389e-17	2.74065e-15	27.7978
TSPAN1	1.58233	4.49898	3.45859	0.000751795	0.00305769	-1.55779
LOC100134445	1.58203	7.09194	9.10561	2.27568e-15	7.37954e-14	24.3191
TAP1	1.58094	7.86447	4.33368	3.0615e-05	0.000173867	1.47494
ARHGAP32	1.58037	5.50657	6.36716	3.66471e-09	4.49025e-08	10.2389
RAB17	1.57597	4.85029	5.71708	8.04641e-08	7.75168e-07	7.22076
RASSF10	1.57486	4.42115	3.09829	0.00242368	0.00861743	-2.64533
POSTN	1.57436	6.45825	5.51672	2.01453e-07	1.77985e-06	6.3272
NCAPG	1.57344	6.02435	5.65381	1.07714e-07	1.00412e-06	6.9366
TSPAN5	1.57189	5.94925	4.87247	3.39805e-06	2.3658e-05	3.58848
KIF23	1.57182	4.34848	6.55608	1.45097e-09	1.92416e-08	11.1468
FAAH2	1.57062	4.11024	7.26147	4.142e-11	7.09829e-10	14.6398
MGP	1.56945	9.02477	3.1366	0.00214928	0.00775638	-2.53445
SPP1	1.56794	5.54162	4.76254	5.39043e-06	3.57997e-05	3.14336
MYBL2	1.56492	5.68665	5.14566	1.0509e-06	8.0028e-06	4.72351
PPAT	1.56312	6.08071	7.50417	1.18155e-11	2.21198e-10	15.8745
TFAP2C	1.5619	5.00145	6.54474	1.53447e-09	2.01789e-08	11.0919
ALDH3B2	1.56033	4.85827	4.74297	5.84779e-06	3.85495e-05	3.06487
PIAS3	1.56004	6.36603	6.33666	4.25105e-09	5.14399e-08	10.0936
TAF1D	1.55745	6.91176	7.01157	1.4838e-10	2.33371e-09	13.3851
ATP8B1	1.55608	8.49898	7.43801	1.66555e-11	3.03998e-10	15.5364
TMC5	1.55528	4.59609	4.43431	2.05578e-05	0.000121646	1.8564
SPIN4	1.55478	7.43588	6.5046	1.86985e-09	2.42005e-08	10.8982
CFB	1.55378	6.27646	5.45025	2.72091e-07	2.35115e-06	6.03492
IPO4	1.55213	6.59088	6.93765	2.15726e-10	3.32895e-09	13.0174
CYP4Z2P	1.55057	4.41701	2.84371	0.0052418	0.0168512	-3.35215
NRARP	1.55029	6.04215	5.83762	4.59472e-08	4.64053e-07	7.76709
LAPTM4B	1.54896	7.32019	4.4742	1.75272e-05	0.000105065	2.00935
TFAP2B	1.54379	4.96552	2.76158	0.00665543	0.0206903	-3.56894
ISG20	1.54376	7.10519	3.89173	0.000163825	0.000779576	-0.122722
SPAG1	1.54307	4.68225	5.2723	6.02381e-07	4.81857e-06	5.26307
CST6	1.54223	3.86973	3.7457	0.000277616	0.00125178	-0.621549
MFAP2	1.54207	6.00986	4.12622	6.82853e-05	0.000356872	0.708882
CENPM	1.54194	6.16804	6.76764	5.07082e-10	7.25588e-09	12.1781
CHPF2	1.5417	7.07594	7.25674	4.24379e-11	7.24845e-10	14.6159
C10orf2	1.54153	4.68787	6.57627	1.31327e-09	1.75063e-08	11.2446
SUCO	1.54066	8.7042	7.60482	6.99479e-12	1.35026e-10	16.3908
PTGFRN	1.53911	7.18689	6.48247	2.08477e-09	2.67787e-08	10.7916
FLJ38379	1.53804	3.97811	4.07411	8.3187e-05	0.000426289	0.5209
LOC727820	1.53696	5.19766	6.00735	2.06672e-08	2.22692e-07	8.54702
BST2	1.53615	8.84031	3.91672	0.000149484	0.000719025	-0.0358884
CYB561	1.53606	6.68469	9.60651	1.46728e-16	5.62236e-15	27.0313
PRRG4	1.53203	5.11389	6.73652	5.92401e-10	8.37135e-09	12.0255
FBXL16	1.53113	4.48416	7.4948	1.24047e-11	2.31381e-10	15.8265
FOXM1	1.52763	3.77115	4.85428	3.66936e-06	2.53315e-05	3.51433
BARD1	1.52731	4.95519	8.40425	1.01293e-13	2.54737e-12	20.568
TUFT1	1.52684	8.02651	5.03693	1.68407e-06	1.23955e-05	4.26694
CAPG	1.52286	7.78946	4.34662	2.90965e-05	0.000165888	1.52363
CSK	1.52215	7.31887	6.8843	2.82346e-10	4.27004e-09	12.753
HIST1H2BE	1.52192	5.23811	4.82721	4.11216e-06	2.81981e-05	3.40438
RNF183	1.51895	4.24021	3.21593	0.00167043	0.00619281	-2.30125
ATAD2	1.51892	6.11201	6.43617	2.61609e-09	3.29824e-08	10.5691
PLS1	1.51827	4.13119	4.3668	2.6871e-05	0.000154491	1.59981
CANT1	1.51646	6.8736	7.70009	4.24997e-12	8.46767e-11	16.8817
MTCL1	1.51473	5.12445	4.39673	2.38707e-05	0.000139276	1.7132
FANCI	1.51389	4.71741	9.00892	3.8534e-15	1.21492e-13	23.7983
VAMP8	1.51325	9.36002	5.83998	4.54418e-08	4.59856e-07	7.77788
DDX39A	1.50948	8.86597	6.90697	2.51862e-10	3.84311e-09	12.8653
ROGDI	1.50632	5.20936	7.23846	4.66148e-11	7.90906e-10	14.5236
TUBA4A	1.50051	7.99257	5.15519	1.00806e-06	7.69948e-06	4.76383
TRAPPC10	1.5004	5.13797	8.71489	1.89975e-14	5.42901e-13	22.2214
RUSC1-AS1	1.49841	4.71518	7.73376	3.56211e-12	7.15992e-11	17.0557
MANEAL	1.49818	4.30719	4.04243	9.37177e-05	0.000474549	0.407496
KIF2C	1.49678	4.11796	5.87447	3.86668e-08	3.95798e-07	7.9354
ABRACL	1.4966	8.13888	4.64532	8.75387e-06	5.58012e-05	2.67641
AZGP1	1.49548	10.8208	2.27389	0.0247461	0.0627843	-4.73872
DSCAM-AS1	1.49526	3.89751	2.15869	0.0328616	0.0793596	-4.98487
STARD3	1.49518	4.8452	4.53452	1.37482e-05	8.46314e-05	2.24247
HNRNPA1	1.49373	7.41258	6.71162	6.70766e-10	9.36874e-09	11.9036
RGL2	1.49321	8.33831	7.52417	1.06484e-11	2.00633e-10	15.9769
CCNE2	1.49093	4.39475	8.38202	1.14122e-13	2.85473e-12	20.4503
PLK2	1.49093	8.75811	4.3658	2.69774e-05	0.00015506	1.59602
HMMR	1.4903	4.36881	5.7509	6.87984e-08	6.70358e-07	7.37342
ZSCAN16	1.48927	6.07064	8.11893	4.65284e-13	1.07944e-11	19.063
PPAPDC1B	1.4884	6.50877	5.42988	2.9822e-07	2.55107e-06	5.94579
MMEL1	1.48837	5.78405	5.54798	1.7478e-07	1.56173e-06	6.46537
DPP3	1.48807	6.70549	7.08222	1.03618e-10	1.66817e-09	13.738
SHCBP1	1.48732	4.09456	4.80822	4.4533e-06	3.02133e-05	3.3275
SMYD3	1.48699	6.46012	6.17783	9.16007e-09	1.04887e-07	9.34237
ANKRD10-IT1	1.48673	5.51826	10.6151	5.6416e-19	3.08659e-17	32.5381
TIGD1	1.4835	5.50814	6.01795	1.96534e-08	2.12216e-07	8.59615
GATA3-AS1	1.48215	3.702	3.59421	0.000472835	0.00202447	-1.12304
CERS2	1.48136	8.9829	5.16496	9.65949e-07	7.42217e-06	4.80518
GALNT3	1.48044	4.80819	5.40062	3.40104e-07	2.86987e-06	5.81809
NPDC1	1.48007	6.98746	5.02026	1.8094e-06	1.32228e-05	4.1975
ALCAM	1.47786	6.86	5.1229	1.16048e-06	8.78494e-06	4.62743
TMPRSS3	1.47769	4.84449	3.9329	0.00014084	0.000681614	0.0205996
TACC3	1.47536	6.55589	5.94078	2.83116e-08	2.97388e-07	8.23966
LRP2	1.47353	4.91652	2.90381	0.00438772	0.014439	-3.19001
PLEK2	1.4728	5.60563	5.13297	1.11072e-06	8.42384e-06	4.66988
MAL2	1.47217	9.05517	3.58457	0.000488878	0.00208622	-1.15439
NIPSNAP1	1.47025	6.71489	7.66066	5.22465e-12	1.02993e-10	16.6783
STAG3L3	1.46986	4.93193	6.31162	4.80091e-09	5.76842e-08	9.97453
SVIP	1.46613	6.00741	6.65943	8.69707e-10	1.19757e-08	11.6488
NME3	1.46187	9.24837	5.45484	2.66512e-07	2.30586e-06	6.05506
UBE2S	1.45653	5.24494	4.50495	1.54907e-05	9.42525e-05	2.12789
CRIP2	1.45325	5.83286	3.84836	0.00019188	0.000896197	-0.272422
MYO5B	1.45191	5.10226	9.71624	8.0285e-17	3.20232e-15	27.6281
F12	1.45064	4.23501	7.90894	1.41643e-12	3.05083e-11	17.9649
KANSL1	1.4483	7.85842	8.50042	6.04188e-14	1.59316e-12	21.0783
RNASEH2A	1.44647	5.96079	5.49792	2.1937e-07	1.92568e-06	6.24433
VGLL4	1.44602	8.88624	10.2138	5.17514e-18	2.44558e-16	30.3428
SEMA4C	1.44596	7.77515	6.90177	2.58554e-10	3.93934e-09	12.8395
GSTO2	1.44504	4.43314	6.0788	1.47151e-08	1.62493e-07	8.87891
NMRAL1	1.44417	8.63884	8.04067	7.05199e-13	1.59094e-11	18.6528
PRR11	1.44348	10.0775	9.22904	1.16025e-15	3.91767e-14	24.9854
MMP3	1.44292	5.31354	3.47128	0.000720267	0.00294291	-1.5177
TMEM87B	1.4425	6.27052	7.03009	1.35073e-10	2.13262e-09	13.4774
C5orf46	1.44231	4.74264	4.7969	4.66955e-06	3.1555e-05	3.28177
CENPU	1.44208	4.81529	6.83959	3.53555e-10	5.20839e-09	12.5322
DGKD	1.44151	6.51675	6.08907	1.40115e-08	1.55059e-07	8.9268
PDRG1	1.4411	6.90627	6.80661	4.17179e-10	6.07566e-09	12.3697
EPHB4	1.44098	6.89545	7.22078	5.10427e-11	8.59617e-10	14.4343
AHCY	1.44067	7.91028	5.67134	9.93689e-08	9.3743e-07	7.01515
COL4A5	1.43879	4.76409	6.99798	1.58973e-10	2.48884e-09	13.3173
ANXA9	1.43781	4.09076	3.5541	0.000543028	0.00228866	-1.25301
H2BFS	1.43712	6.41389	3.64193	0.000400465	0.00174088	-0.966843
MICAL2	1.4367	5.07772	7.64358	5.71278e-12	1.11968e-10	16.5903
ZNF512B	1.43569	6.48441	8.018	7.95305e-13	1.7692e-11	18.5342
TFPT	1.43398	6.09381	5.14381	1.05944e-06	8.06183e-06	4.71567
RAP1GAP2	1.43255	4.69144	5.87657	3.82881e-08	3.92314e-07	7.94501
IER5L	1.43118	6.03546	8.04881	6.75384e-13	1.53212e-11	18.6954
XBP1	1.43022	7.59267	5.81617	5.0785e-08	5.10144e-07	7.66944
HMGN1	1.42948	10.4864	6.84793	3.39043e-10	5.00903e-09	12.5733
COL5A1	1.42866	7.67056	3.98916	0.00011436	0.000567969	0.218294
ARFGAP1	1.42602	5.89425	8.36133	1.27507e-13	3.16631e-12	20.3408
MREG	1.42159	7.18172	5.54548	1.76774e-07	1.57816e-06	6.45434
ATP13A1	1.42065	6.99247	6.0959	1.3562e-08	1.50573e-07	8.95867
EBLN2	1.41906	5.93131	7.32494	2.98774e-11	5.2297e-10	14.9612
GTF3C1	1.41876	6.73378	6.88193	2.85737e-10	4.31177e-09	12.7413
C6orf132	1.41509	4.14569	6.99574	1.60786e-10	2.51529e-09	13.3062
EP300-AS1	1.41371	5.09454	4.03066	9.79484e-05	0.00049365	0.36551
BLNK	1.4132	7.04224	4.02053	0.000101731	0.000511831	0.329489
ADAR	1.41241	11.4738	8.926	6.04868e-15	1.85282e-13	23.3525
TMEM158	1.41199	4.85994	3.74196	0.000281337	0.0012666	-0.634115
HYOU1	1.41182	7.50874	6.33315	4.32421e-09	5.22634e-08	10.0769
LINC00342	1.40903	6.30604	6.2109	7.8128e-09	9.07296e-08	9.49798
PEX11B	1.40897	7.77199	5.61584	1.28212e-07	1.17645e-06	6.76695
CDCA4	1.40777	6.65636	5.9562	2.63243e-08	2.77225e-07	8.31072
FJX1	1.40696	5.7766	4.6459	8.73319e-06	5.56955e-05	2.67868
LOC254057	1.40661	4.74672	4.15876	6.03148e-05	0.000319565	0.827189
VANGL2	1.40559	4.27386	4.29083	3.6208e-05	0.000202207	1.31445
SCNN1A	1.40428	5.21396	7.54953	9.3316e-12	1.77457e-10	16.1069
RPS24	1.40382	9.93106	6.86208	3.15753e-10	4.7057e-09	12.6432
RPS6KB2	1.4025	5.79082	7.24572	4.49107e-11	7.63258e-10	14.5602
ZNF239	1.40115	5.75726	5.27999	5.8223e-07	4.672e-06	5.29608
FGFR3	1.40027	4.38032	5.57996	1.5107e-07	1.36116e-06	6.60725
ZWILCH	1.39967	5.68633	7.17462	6.46574e-11	1.07563e-09	14.2017
SHANK2	1.39952	4.26602	6.83348	3.64565e-10	5.36286e-09	12.5021
CNKSR1	1.39811	5.46099	7.24993	4.3949e-11	7.49403e-10	14.5815
ANKRD30B	1.39792	3.9436	2.99733	0.00330954	0.0113263	-2.93187
GRHL1	1.3968	4.84687	6.85703	3.23872e-10	4.81268e-09	12.6183
HIST1H2BC	1.39462	4.48235	2.93295	0.00402145	0.0133843	-3.11035
PDCD6	1.39391	7.01591	10.1493	7.38714e-18	3.42757e-16	29.9903
RPS6KA1	1.39236	5.2544	5.37475	3.81882e-07	3.18811e-06	5.70553
DLG3	1.39161	4.4838	10.52	9.53724e-19	5.08206e-17	32.018
PROM1	1.39016	5.76094	2.04	0.0435409	0.100364	-5.22603
HES4	1.38505	6.07757	6.14388	1.0781e-08	1.21543e-07	9.18303
TRIM28	1.38475	8.1156	6.25121	6.4321e-09	7.5858e-08	9.68825
SNHG17	1.38441	7.26051	6.15601	1.01716e-08	1.15373e-07	9.23992
FAM84B	1.3832	5.45271	9.36229	5.59869e-16	1.99931e-14	25.7062
NAT10	1.38244	7.04496	6.6437	9.40385e-10	1.28452e-08	11.5721
LOC101926959	1.38115	3.82779	3.03211	0.00297523	0.0103413	-2.83408
CERS4	1.3808	5.78574	4.05393	8.97581e-05	0.000455853	0.448558
HSPA2	1.38068	7.01749	3.11072	0.00233123	0.00834383	-2.60946
FAAH	1.37777	5.26846	4.99659	2.00306e-06	1.45444e-05	4.09915
TUBBP5	1.37763	4.46006	5.20066	8.26051e-07	6.43911e-06	4.95682
MAGED1	1.37527	10.1061	4.60287	1.04152e-05	6.56142e-05	2.50927
DMKN	1.37502	4.90103	4.29109	3.61704e-05	0.000202053	1.31544
DENND1B	1.37374	5.42455	7.09335	9.79074e-11	1.58495e-09	13.7938
MICAL1	1.37065	5.88105	4.8179	4.27608e-06	2.92047e-05	3.36667
KCNS3	1.36583	6.66465	5.0088	1.90078e-06	1.38461e-05	4.14984
HES1	1.36499	6.40631	7.8498	1.93505e-12	4.06519e-11	17.6573
CBX3	1.36466	8.43689	8.87438	8.00594e-15	2.3985e-13	23.0754
COBL	1.36144	4.14363	5.11409	1.20586e-06	9.10488e-06	4.59028
PUS1	1.3589	6.38114	6.84919	3.36898e-10	4.98093e-09	12.5796
SERTAD4	1.35556	5.398	4.96574	2.28599e-06	1.64472e-05	3.97141
MST1R	1.35438	3.98656	5.29717	5.39541e-07	4.36539e-06	5.36998
DNAJC1	1.35	8.85794	5.3301	4.66069e-07	3.83617e-06	5.51207
SYTL2	1.34961	5.87107	4.66472	8.083e-06	5.19292e-05	2.75313
RAI14	1.34862	7.72484	6.8197	3.90683e-10	5.72237e-09	12.4341
SLC1A4	1.34805	5.77111	5.11569	1.1975e-06	9.04846e-06	4.59701
GRAMD1C	1.34771	5.43683	5.04834	1.60326e-06	1.1822e-05	4.31452
SLC26A11	1.34741	6.30398	6.68363	7.71102e-10	1.06972e-08	11.7668
GGT6	1.34585	4.19875	4.37402	2.61157e-05	0.000150621	1.62711
RAMP1	1.34558	5.18442	3.60366	0.000457589	0.00196376	-1.09224
CXCL11	1.34548	3.51737	3.04669	0.00284459	0.00993277	-2.79279
LYPD3	1.34409	4.19997	3.96604	0.00012461	0.000612927	0.136781
EME2	1.34406	4.88781	6.17451	9.30742e-09	1.06372e-07	9.32676
ZNF776	1.34379	7.22309	6.99219	1.63705e-10	2.55705e-09	13.2885
CRISP3	1.34322	3.48194	2.20858	0.0291001	0.0719225	-4.87972
PLEKHF2	1.34253	6.19032	4.6659	8.04383e-06	5.16937e-05	2.75781
ZNF700	1.34248	6.92798	6.17063	9.48232e-09	1.08093e-07	9.30855
TTLL12	1.34171	7.0863	5.41636	3.16913e-07	2.69297e-06	5.88671
GGCT	1.33998	10.5496	5.53213	1.87841e-07	1.66968e-06	6.39526
CSTF3	1.33871	6.8124	7.34437	2.70288e-11	4.77603e-10	15.0598
SLC26A6	1.3374	5.75557	7.98659	9.39311e-13	2.07114e-11	18.37
FANCL	1.33711	7.78165	6.88206	2.85547e-10	4.31177e-09	12.742
C10orf35	1.33581	5.44238	6.36247	3.74929e-09	4.58291e-08	10.2166
NPTN-IT1	1.33282	5.69206	5.99642	2.17659e-08	2.33669e-07	8.49642
NSUN5P1	1.33255	8.33822	7.55335	9.1479e-12	1.74287e-10	16.1265
TRIM11	1.33071	4.99101	7.999	8.79557e-13	1.94357e-11	18.4348
PRPF19	1.3292	8.8068	6.89072	2.73353e-10	4.14322e-09	12.7848
SLC12A7	1.32788	7.56059	8.52217	5.37435e-14	1.43564e-12	21.194
GLYATL2	1.32721	3.9131	2.63129	0.00962033	0.0283443	-3.90131
VPS37B	1.3254	7.39899	6.19651	8.37317e-09	9.67429e-08	9.43022
CNNM4	1.32389	4.10262	5.98924	2.25183e-08	2.40737e-07	8.46323
ZNF618	1.32145	6.08635	6.49	2.00899e-09	2.58867e-08	10.8278
TRIB3	1.31841	4.58774	7.74251	3.40223e-12	6.85202e-11	17.101
D2HGDH	1.31764	7.48394	5.06333	1.5027e-06	1.11205e-05	4.37721
PRLR	1.31658	4.40607	6.79046	4.52353e-10	6.546e-09	12.2902
PIK3R3	1.31588	5.94727	5.90292	3.38339e-08	3.50537e-07	8.06571
PNMAL1	1.31415	5.08392	2.95679	0.00374284	0.0125943	-3.04465
PLEKHA6	1.31394	4.98462	5.08326	1.3785e-06	1.0302e-05	4.46071
FAM173A	1.31356	7.68411	5.89885	3.44862e-08	3.56347e-07	8.04707
LUC7L3	1.31094	8.49499	5.57067	1.57611e-07	1.41698e-06	6.56599
HIST1H2AC	1.31077	8.13629	2.92036	0.0041761	0.0138304	-3.14485
LPAR2	1.31045	4.35188	8.4337	8.64801e-14	2.20368e-12	20.7241
LRG1	1.31016	5.5427	3.03219	0.00297452	0.0103406	-2.83386
ZDHHC13	1.30824	5.5195	6.7954	4.41287e-10	6.39945e-09	12.3146
SULF2	1.3074	5.54545	5.00623	1.9219e-06	1.398e-05	4.13916
PPAPDC1A	1.30612	4.16557	4.04203	9.38604e-05	0.000475119	0.40605
RAB11FIP3	1.30511	5.86593	8.49979	6.06224e-14	1.59647e-12	21.075
NFKBIE	1.30438	5.61619	5.44474	2.78921e-07	2.40307e-06	6.01082
DACH1	1.30382	6.21886	2.59216	0.0107193	0.0311472	-3.99834
NEBL	1.30378	4.74092	7.21224	5.33255e-11	8.97325e-10	14.3913
TRIM47	1.30367	5.87857	3.78482	0.000241358	0.00110238	-0.489378
STRBP	1.30326	6.13706	6.91294	2.44392e-10	3.74028e-09	12.8948
CLK2	1.29998	8.08633	7.98203	9.62263e-13	2.11947e-11	18.3462
KISS1R	1.29918	3.64271	2.94104	0.00392486	0.0131398	-3.08811
CD2	1.29771	5.42057	2.85013	0.00514393	0.0165913	-3.33499
MYH9	1.29488	7.25816	6.73532	5.95967e-10	8.41593e-09	12.0196
FTX	1.2946	6.06863	4.2143	4.87279e-05	0.000263636	1.03072
NPIPA1	1.29262	8.76925	5.46235	2.57636e-07	2.2319e-06	6.08799
SUSD4	1.29143	4.41957	4.28591	3.69101e-05	0.000205567	1.29608
PPP1CA	1.29105	8.35996	4.48924	1.65012e-05	9.99843e-05	2.06724
MEN1	1.28943	5.18495	5.19123	8.6096e-07	6.68829e-06	4.9167
PMS2P5	1.2879	4.64372	6.85707	3.2381e-10	4.81268e-09	12.6185
NVL	1.28771	6.55133	4.60226	1.04409e-05	6.5736e-05	2.5069
CBX4	1.2854	5.55391	10.0898	1.02569e-17	4.72695e-16	29.6653
FLRT3	1.28374	5.17307	2.48375	0.0143781	0.0399953	-4.26037
PIP4K2C	1.28275	7.32967	7.33767	2.79785e-11	4.92258e-10	15.0258
CTSD	1.28266	7.92107	3.5664	0.000520524	0.00220562	-1.21329
LAGE3	1.27906	7.85273	4.46984	1.78363e-05	0.000106715	1.99258
POLR2H	1.27815	9.0185	8.07443	5.89464e-13	1.34616e-11	18.8296
DNMT3B	1.27807	6.27151	6.06263	1.58936e-08	1.74004e-07	8.80362
ZNF862	1.27707	5.5949	8.28296	1.93977e-13	4.71958e-12	19.9265
PAGR1	1.27607	5.91507	7.33026	2.90683e-11	5.10554e-10	14.9882
CELSR1	1.27597	3.76756	8.41598	9.51142e-14	2.40572e-12	20.6302
EPT1	1.27499	4.43137	8.74655	1.60072e-14	4.61324e-13	22.3906
ZNF629	1.27388	6.03358	6.62738	1.01968e-09	1.3836e-08	11.4927
FOXP1-IT1	1.27102	6.37873	6.40358	3.06815e-09	3.81181e-08	10.413
PARP9	1.27045	6.24232	5.65694	1.06173e-07	9.92926e-07	6.95063
BCAS1	1.27034	4.64092	4.01067	0.000105549	0.000529088	0.294473
SIDT1	1.26999	6.0667	3.00936	0.00319017	0.010971	-2.89815
UBE2Z	1.26843	6.84792	6.19783	8.3202e-09	9.61853e-08	9.43643
RASSF7	1.26806	5.76598	6.61508	1.08377e-09	1.46184e-08	11.4329
UGCG	1.2643	8.2007	4.32578	3.15797e-05	0.000178998	1.44526
NOP2	1.2631	6.60114	5.64578	1.1176e-07	1.03805e-06	6.90069
RPL32P3	1.26047	5.5704	8.66567	2.47881e-14	6.95768e-13	21.9585
BCOR	1.26017	5.3203	6.51731	1.75649e-09	2.28634e-08	10.9595
PTTG1IP	1.26	10.031	5.87945	3.77754e-08	3.87643e-07	7.95816
AEBP1	1.25983	9.38358	3.90371	0.00015679	0.000749939	-0.0811288
PLP2	1.25824	8.70153	4.10052	7.52825e-05	0.000389785	0.615954
TOMM34	1.25789	5.45849	6.90958	2.48564e-10	3.79845e-09	12.8782
DANCR	1.25735	6.59574	3.38346	0.000966817	0.00381764	-1.79276
ZNF217	1.2571	8.76645	6.06788	1.5501e-08	1.70436e-07	8.82806
PCDHGA4	1.25684	4.84242	3.99508	0.000111866	0.000557274	0.239238
KLRG2	1.25672	3.79379	3.66971	0.000363305	0.00159733	-0.87517
HDGF	1.256	10.424	6.5541	1.4652e-09	1.93926e-08	11.1372
RMI1	1.25519	6.42254	6.61921	1.0618e-09	1.43504e-08	11.453
ZNF587	1.25496	6.65852	6.6305	1.00402e-09	1.36507e-08	11.5079
DEF6	1.25451	5.36047	7.27585	3.84689e-11	6.63143e-10	14.7125
LIMK2	1.25425	4.98124	8.61824	3.20229e-14	8.85476e-13	21.7054
BZW2	1.25302	10.2971	7.32347	3.01037e-11	5.2603e-10	14.9538
ARF1	1.25233	6.77151	9.06799	2.79346e-15	8.94519e-14	24.1164
TIMP1	1.25223	9.65356	3.82156	0.000211446	0.000979092	-0.364296
FANCF	1.25085	5.31861	7.00164	1.56048e-10	2.44679e-09	13.3356
CHD3	1.25084	5.49894	7.24278	4.55921e-11	7.74195e-10	14.5454
PIGU	1.2506	5.72379	5.01186	1.876e-06	1.36803e-05	4.16253
ST6GALNAC2	1.25025	6.54622	3.54738	0.000555716	0.0023354	-1.27468
SLC25A29	1.24934	5.34376	7.2283	4.91112e-11	8.30507e-10	14.4722
CABLES2	1.2491	5.75938	6.24801	6.53227e-09	7.69064e-08	9.67313
PPP1R35	1.24476	7.13575	6.29102	5.30507e-09	6.35181e-08	9.87678
ESPL1	1.24423	5.3369	5.84145	4.51309e-08	4.57163e-07	7.78457
PSD4	1.24393	4.56547	9.93157	2.45425e-17	1.05061e-15	28.8014
SS18L1	1.24374	6.7608	5.28855	5.60548e-07	4.5175e-06	5.33291
CNOT11	1.24259	6.24109	6.84389	3.45986e-10	5.10792e-09	12.5534
SEC16A	1.24208	9.03561	6.14315	1.08187e-08	1.21901e-07	9.17962
CTPS2	1.24205	6.58394	5.37188	3.86815e-07	3.22667e-06	5.69307
OCLN	1.24198	4.90992	7.03143	1.34158e-10	2.11981e-09	13.4841
NME1	1.24197	9.65082	3.80839	0.000221735	0.00102142	-0.409228
SIRT7	1.24155	6.67207	6.46391	2.28356e-09	2.90767e-08	10.7023
TRIB2	1.24125	6.28929	4.10064	7.52481e-05	0.000389706	0.616389
KIFC1	1.24121	5.1038	5.75351	6.79725e-08	6.63575e-07	7.38519
SPNS1	1.23795	5.28853	5.79916	5.49759e-08	5.47671e-07	7.5921
TRMT13	1.23599	5.50681	5.99468	2.19455e-08	2.35228e-07	8.48839
LCLAT1	1.23569	7.21813	6.24888	6.50504e-09	7.66299e-08	9.67721
DCTPP1	1.23563	8.545	6.23088	7.09562e-09	8.31561e-08	9.59218
SFI1	1.23487	6.30343	5.53534	1.85116e-07	1.64689e-06	6.40947
LOXL1-AS1	1.23455	4.34694	4.28731	3.67083e-05	0.000204666	1.30133
TMEM41B	1.23446	7.31745	4.74003	5.91968e-06	3.89982e-05	3.05309
RND1	1.23267	5.11649	3.96093	0.00012699	0.000622834	0.118825
FRMD6-AS1	1.23232	5.30873	5.56211	1.63888e-07	1.47018e-06	6.52799
DHCR24	1.23227	9.30626	3.32442	0.0011749	0.00452659	-1.9744
DTX3L	1.23109	8.53305	7.03969	1.28642e-10	2.04369e-09	13.5254
ERBB2	1.23071	4.15408	4.8596	3.58792e-06	2.48447e-05	3.53599
IL17RB	1.23048	4.89706	3.57276	0.000509238	0.00216273	-1.19271
SUGP2	1.22933	6.49318	11.0388	5.4229e-20	3.4248e-18	34.8589
IRF9	1.22925	5.28616	4.32754	3.13613e-05	0.000177859	1.4519
RTKN	1.22883	4.046	9.09724	2.38191e-15	7.67538e-14	24.274
NUDT16L1	1.22775	7.70746	6.55306	1.47273e-09	1.94796e-08	11.1322
BZRAP1	1.22739	4.75206	5.29251	5.50809e-07	4.44426e-06	5.34992
KDM2A	1.22516	7.47603	7.93925	1.20676e-12	2.62689e-11	18.1229
C1orf116	1.22367	4.15626	3.97581	0.000120174	0.000593673	0.171201
NSUN6	1.22156	6.23254	5.45473	2.66651e-07	2.30609e-06	6.05455
ZMYND19	1.21983	5.9238	6.89947	2.61567e-10	3.97513e-09	12.8281
SPAG4	1.21966	4.04746	4.27763	3.81204e-05	0.00021133	1.26524
PPP4C	1.21916	8.48046	4.8752	3.35913e-06	2.3395e-05	3.5996
KRT80	1.21899	3.68689	4.63994	8.94932e-06	5.69052e-05	2.65516
B3GAT3	1.21763	5.30916	6.23325	7.01489e-09	8.22571e-08	9.60338
PYCR1	1.21679	7.82098	6.27421	5.75514e-09	6.84661e-08	9.79708
STRA13	1.21672	9.21055	5.56133	1.64465e-07	1.47471e-06	6.52457
DIO1	1.21593	3.47535	2.38896	0.0184514	0.0492695	-4.48118
MMP11	1.21495	3.77788	7.00242	1.55434e-10	2.43903e-09	13.3395
OFD1	1.21476	6.88522	7.51535	1.11479e-11	2.09659e-10	15.9317
FANCG	1.21457	5.72726	6.19113	8.59276e-09	9.90006e-08	9.4049
CAPN1	1.21368	5.91637	8.99185	4.22834e-15	1.32294e-13	23.7065
MORF4L2	1.21306	8.18934	6.41081	2.96153e-09	3.6883e-08	10.4476
TDG	1.21243	9.22771	6.98691	1.68145e-10	2.6244e-09	13.2622
METTL3	1.21241	6.62878	7.10957	9.01384e-11	1.46615e-09	13.875
ZNF623	1.20807	6.46553	5.78493	5.87415e-08	5.80942e-07	7.5275
ARFIP2	1.20585	6.92937	4.86502	3.50666e-06	2.43644e-05	3.5581
YDJC	1.20584	5.91505	7.64703	5.61047e-12	1.10174e-10	16.6081
KCNK1	1.20582	4.54369	5.24478	6.80253e-07	5.38883e-06	5.14513
KDM5B	1.20488	5.62766	9.32471	6.87718e-16	2.40548e-14	25.5027
CCR5	1.2034	6.5165	3.43747	0.000807204	0.00325202	-1.62428
COX20	1.20289	7.03271	8.30325	1.74022e-13	4.26447e-12	20.0337
TCEAL3	1.20246	8.13671	3.91394	0.000151017	0.000725717	-0.045562
ANKRD13D	1.20216	5.70049	7.62516	6.28996e-12	1.22227e-10	16.4955
VCAN	1.20213	6.85162	4.06428	8.6327e-05	0.000440451	0.48564
ABCC5	1.20162	4.66713	5.15727	9.9896e-07	7.64711e-06	4.77262
LRBA	1.20084	7.43837	4.19352	5.2786e-05	0.000282899	0.954371
PRRT3	1.20068	4.57653	4.06425	8.63373e-05	0.000440451	0.485527
CDKN3	1.20023	4.01835	3.96379	0.000125652	0.000617458	0.128877
SEC61A1	1.19955	5.90459	5.99408	2.20081e-08	2.35528e-07	8.48561
TIAM1	1.19882	4.78871	5.22015	7.58226e-07	5.96265e-06	5.03989
TRA2A	1.19867	6.06624	10.5522	7.98405e-19	4.32195e-17	32.1941
TMED9	1.19826	9.63268	6.84959	3.36223e-10	4.97454e-09	12.5815
LOC284889	1.19801	4.27702	6.78513	4.64582e-10	6.69928e-09	12.2641
PMS2P8	1.19731	5.951	6.34896	4.0043e-09	4.86267e-08	10.1522
LOC399491	1.19602	8.74594	5.47795	2.40108e-07	2.09246e-06	6.15649
CENPW	1.19601	5.26268	3.73181	0.000291687	0.00130917	-0.668207
GAA	1.19507	6.62071	4.90686	2.93749e-06	2.07266e-05	3.72912
ATP6V0B	1.1948	8.65932	3.64898	0.000390709	0.00170317	-0.943633
RABEP2	1.19312	5.68048	7.38241	2.22081e-11	3.96529e-10	15.2532
WWC3	1.19185	7.53876	6.25204	6.40626e-09	7.56404e-08	9.69219
LCOR	1.19172	6.82699	6.66927	8.2821e-10	1.14428e-08	11.6967
MYO19	1.19155	5.32653	6.86084	3.17723e-10	4.73163e-09	12.6371
KNTC1	1.19151	3.87707	4.88153	3.27043e-06	2.28394e-05	3.62543
RIPK4	1.18844	4.2732	6.42345	2.7841e-09	3.48643e-08	10.5081
IL4I1	1.18802	4.41331	3.02248	0.00306454	0.0106139	-2.86126
ZNF137P	1.1856	4.13887	4.99982	1.9755e-06	1.43598e-05	4.11255
TAGLN2	1.18492	7.46183	4.99486	2.01797e-06	1.46373e-05	4.09198
MMP13	1.18481	3.95786	3.28709	0.00132734	0.00505022	-2.08788
TAF15	1.18464	6.12442	7.15623	7.10315e-11	1.17119e-09	14.1093
FHDC1	1.18394	5.21964	5.64665	1.11316e-07	1.0344e-06	6.90456
FBXO46	1.18385	6.34961	6.80547	4.19585e-10	6.10637e-09	12.3641
ALDH18A1	1.18276	6.96527	6.2622	6.09948e-09	7.24362e-08	9.74021
MTFP1	1.18263	6.91119	5.7116	8.25279e-08	7.92438e-07	7.19608
NETO2	1.18254	4.20241	3.90022	0.00015881	0.000758535	-0.09326
SLC12A2	1.18209	6.41288	3.16286	0.0019782	0.00720119	-2.4578
PTPLAD1	1.18101	9.035	4.22632	4.65168e-05	0.000252876	1.07506
SNRPB	1.18075	9.63238	4.7875	4.85698e-06	3.26919e-05	3.24382
NELL2	1.18053	6.15041	2.43928	0.0161768	0.0441406	-4.36493
INPP5J	1.17902	3.64411	3.72344	0.000300493	0.00134339	-0.696262
CXCR4	1.17827	6.71052	3.74372	0.000279581	0.00125925	-0.628206
DKFZP586I1420	1.17797	8.38908	5.17565	9.2179e-07	7.11761e-06	4.85053
RBM12B	1.17735	4.99893	7.32875	2.92953e-11	5.1366e-10	14.9806
NBPF4	1.17721	3.44314	2.69757	0.00798864	0.0242204	-3.734
S100A16	1.17703	9.26731	3.7406	0.000282707	0.00127193	-0.638699
RNF213	1.17667	5.40179	7.18321	6.18756e-11	1.03524e-09	14.245
CDCA8	1.17648	4.03753	4.53394	1.37807e-05	8.48064e-05	2.2402
PSD3	1.17528	5.74252	2.49868	0.0138157	0.0386357	-4.22489
NEK2	1.17437	4.20117	6.9046	2.54893e-10	3.88646e-09	12.8535
SHROOM2	1.17401	3.80365	5.32157	4.841e-07	3.96544e-06	5.47522
TGIF2	1.17134	5.71195	6.53076	1.6439e-09	2.15348e-08	11.0244
SMARCA4	1.17048	5.94744	10.7477	2.7104e-19	1.55787e-17	33.2645
TPRN	1.16952	3.91956	5.79169	5.69214e-08	5.654e-07	7.55819
ZNF764	1.16883	5.94931	7.28449	3.67953e-11	6.36977e-10	14.7563
UNC5B	1.16825	5.88809	7.35561	2.55052e-11	4.52242e-10	15.1169
HELLS	1.16811	3.93245	6.55417	1.46468e-09	1.93926e-08	11.1376
IGF1R	1.16781	4.88405	4.54903	1.29641e-05	8.01426e-05	2.29887
CLDN4	1.16723	4.21984	9.48788	2.81336e-16	1.04477e-14	26.3871
MBOAT1	1.16696	4.89935	3.39649	0.000925794	0.00367623	-1.75231
TMEM141	1.16607	7.82275	5.28947	5.58282e-07	4.50101e-06	5.33684
CYTH2	1.16559	5.63018	8.7736	1.3826e-14	4.01287e-13	22.5354
PYCRL	1.16538	3.94175	4.38501	2.50052e-05	0.000144822	1.66872
C5orf28	1.16527	5.0142	7.39761	2.05302e-11	3.6828e-10	15.3305
CDK5RAP3	1.16464	8.4332	6.26719	5.95385e-09	7.07889e-08	9.76386
NLRC5	1.16453	7.72553	3.52153	0.000607173	0.00252983	-1.35773
ZNF469	1.16374	6.48727	4.6486	8.63696e-06	5.5159e-05	2.68934
MGAT4B	1.16209	7.2244	5.2916	5.53028e-07	4.46041e-06	5.34602
ILF3	1.16088	7.6828	8.45467	7.72667e-14	1.98373e-12	20.8354
KAT2A	1.16069	6.09455	6.26267	6.08546e-09	7.23116e-08	9.74246
E2F8	1.15872	4.15611	4.41543	2.21627e-05	0.000130351	1.78434
FAM129B	1.15659	6.33803	7.08239	1.03533e-10	1.6681e-09	13.7388
CHKA	1.15577	5.29141	5.50335	2.14044e-07	1.88296e-06	6.26823
TRIM26	1.15512	6.12142	6.67369	8.10212e-10	1.12017e-08	11.7183
LHX4-AS1	1.15354	4.98969	5.64523	1.12043e-07	1.03974e-06	6.89822
ANKZF1	1.15268	4.7997	6.76718	5.0825e-10	7.26751e-09	12.1759
ZNF500	1.15132	5.49128	7.24711	4.45903e-11	7.59074e-10	14.5672
RHBDF2	1.15102	7.11031	4.49249	1.6287e-05	9.87453e-05	2.07977
UBXN10-AS1	1.15035	4.35738	3.37124	0.00100683	0.00395578	-1.83058
PRPF3	1.1502	7.78644	5.09765	1.29513e-06	9.7287e-06	4.52111
TMEM30B	1.14936	4.19331	6.72578	6.25028e-10	8.78544e-09	11.9729
C14orf79	1.14926	5.65545	6.50624	1.85483e-09	2.4067e-08	10.9061
LOC101927204	1.14857	4.97859	6.82511	3.80203e-10	5.57686e-09	12.4608
HIST1H2BH	1.14827	4.36968	3.97241	0.0001217	0.000600487	0.159219
PDK3	1.14715	4.96067	4.78627	4.88189e-06	3.2838e-05	3.23889
SMAGP	1.14708	5.20156	3.54629	0.000557806	0.00234322	-1.27821
CMPK2	1.14638	8.57243	2.84162	0.00527408	0.0169446	-3.35774
P4HTM	1.1459	7.48864	3.44377	0.000790293	0.0031908	-1.60449
E2F3	1.14575	7.42968	7.01234	1.47806e-10	2.32647e-09	13.3889
HSPBP1	1.14491	6.2778	5.61155	1.30755e-07	1.19531e-06	6.74783
KIAA0907	1.1444	5.84079	8.6955	2.10979e-14	5.96277e-13	22.1177
ZNF367	1.14411	3.96866	5.70063	8.68171e-08	8.30117e-07	7.14671
TARBP1	1.14231	7.0463	5.62971	1.20316e-07	1.11097e-06	6.82885
RHOT2	1.14168	5.53582	8.70733	1.97906e-14	5.64003e-13	22.1809
ELL3	1.14061	6.41671	3.56901	0.00051587	0.00218817	-1.20486
ZNF785	1.14022	5.5035	5.58058	1.50644e-07	1.35838e-06	6.61
ATG16L1	1.13929	4.79354	5.99572	2.18376e-08	2.34194e-07	8.49321
ZNF121	1.1384	8.90457	6.39193	3.24767e-09	4.02506e-08	10.3573
DNAH5	1.13839	4.29148	3.96314	0.000125954	0.000618494	0.126601
HK1	1.13831	8.51309	7.42607	1.77179e-11	3.21689e-10	15.4755
CCDC167	1.13819	7.29649	5.26979	6.09106e-07	4.86666e-06	5.2523
HDAC1	1.13779	9.875	4.95557	2.38744e-06	1.7129e-05	3.92944
NOD2	1.13693	3.68338	4.39805	2.37459e-05	0.000138627	1.71822
SLC44A2	1.13687	7.11156	5.78508	5.87013e-08	5.80825e-07	7.52816
C3orf52	1.13597	3.96529	5.38721	3.61164e-07	3.03123e-06	5.75972
CD9	1.1351	5.74481	6.58158	1.27922e-09	1.70746e-08	11.2703
SLC35F2	1.13455	4.43293	4.14611	6.33005e-05	0.000333658	0.781124
IP6K2	1.13415	7.21143	5.79808	5.52537e-08	5.50171e-07	7.58719
HJURP	1.13364	4.43899	5.80503	5.34938e-08	5.34468e-07	7.61875
SIX4	1.13297	4.50838	7.60732	6.90429e-12	1.33531e-10	16.4037
TCIRG1	1.13108	8.37635	3.97501	0.000120532	0.000595302	0.16837
NFATC2IP	1.12929	6.26829	7.85529	1.87989e-12	3.96561e-11	17.6858
PGAP2	1.12849	6.23705	5.11487	1.20176e-06	9.07733e-06	4.59357
TRIT1	1.12329	6.96365	6.1461	1.06667e-08	1.2052e-07	9.19345
PARD6B	1.12328	4.08502	6.81262	4.04795e-10	5.9206e-09	12.3993
CERS6	1.12141	6.26793	4.60123	1.04851e-05	6.58925e-05	2.50284
PPM1H	1.12138	4.52394	6.25178	6.41434e-09	7.56922e-08	9.69095
CHD4	1.11998	8.1585	10.6837	3.85994e-19	2.17581e-17	32.9142
NAPSB	1.11701	4.77259	2.71249	0.00765788	0.0233699	-3.69583
WDR46	1.11415	6.02339	5.96552	2.51915e-08	2.6598e-07	8.35367
MICALL1	1.1134	6.07347	4.08934	7.85383e-05	0.000405003	0.575639
DBF4	1.11243	5.43304	4.75771	5.49991e-06	3.64558e-05	3.12398
ANKHD1	1.11229	4.85651	5.76121	6.55854e-08	6.43032e-07	7.42005
PTOV1	1.11104	8.11597	5.30845	5.13173e-07	4.18015e-06	5.41861
PSMG3	1.11007	8.28991	5.86666	4.01085e-08	4.0994e-07	7.89968
ZNF165	1.10919	4.18894	3.79397	0.000233559	0.00107034	-0.458336
FAM64A	1.1091	3.9584	4.29724	3.53124e-05	0.00019777	1.3384
CACNA1D	1.10906	3.61603	3.73385	0.000289584	0.00130144	-0.661377
HSD17B7	1.10799	9.00345	5.82189	4.94494e-08	4.97216e-07	7.69543
IRF3	1.10751	7.11501	6.14849	1.0545e-08	1.19343e-07	9.20467
CACNA2D2	1.1063	4.49072	3.40373	0.000903735	0.00359491	-1.7298
MISP	1.10603	5.22347	4.24665	4.29976e-05	0.000235686	1.15019
SYCP2	1.10512	3.72636	6.35582	3.87264e-09	4.72522e-08	10.1849
ASB13	1.10484	7.9321	4.05443	8.95883e-05	0.000455202	0.45036
GBAP1	1.1045	8.32234	5.75385	6.78641e-08	6.62833e-07	7.38675
HIP1R	1.10433	6.0033	6.63361	9.88652e-10	1.34686e-08	11.523
PPP2R4	1.10417	7.8328	8.575	4.04325e-14	1.10017e-12	21.4751
C15orf52	1.10389	4.86296	4.12247	6.92641e-05	0.000361459	0.695321
MED1	1.10301	6.52569	3.37128	0.00100669	0.00395578	-1.83045
CDCP1	1.10223	3.73279	6.05871	1.61926e-08	1.77184e-07	8.7854
BIRC5	1.10184	3.80905	4.69243	7.21033e-06	4.68077e-05	2.86312
SLX4IP	1.10133	5.67212	6.26062	6.14606e-09	7.2947e-08	9.73276
RFC4	1.10049	6.34144	4.89666	3.06744e-06	2.15542e-05	3.68731
AP1G2	1.09845	5.09101	9.2165	1.24255e-15	4.16805e-14	24.9176
JAG2	1.09842	6.21818	4.53986	1.34545e-05	8.29485e-05	2.26321
HOMER1	1.09841	5.22337	4.87171	3.40905e-06	2.37246e-05	3.58536
NEK5	1.0966	4.82117	3.07997	0.00256602	0.00906838	-2.69792
HTRA4	1.09599	4.2461	3.38523	0.000961147	0.00379892	-1.78728
TACSTD2	1.09541	4.499	8.51453	5.60015e-14	1.48626e-12	21.1533
SMKR1	1.09488	3.87258	4.05798	8.83995e-05	0.000449519	0.463068
INPP4B	1.09468	4.80005	4.24128	4.39019e-05	0.000240257	1.13031
CKAP4	1.09373	7.0362	7.83673	2.073e-12	4.33719e-11	17.5894
DCUN1D2	1.09275	5.59987	5.14726	1.04361e-06	7.95321e-06	4.73025
DUSP5	1.09195	4.72856	3.49296	0.000669218	0.00276135	-1.44889
ZNF827	1.09144	5.79169	6.68712	7.57837e-10	1.05417e-08	11.7838
ACTN4	1.0912	7.10675	5.73267	7.4862e-08	7.2564e-07	7.29109
CDK1	1.09116	4.42922	5.83955	4.55331e-08	4.60325e-07	7.77592
PTDSS1	1.09066	8.57768	3.69209	0.000335759	0.00148515	-0.800888
CCDC137	1.09027	5.46771	5.27711	5.89704e-07	4.72271e-06	5.28371
HES6	1.09025	4.8558	4.58726	1.10995e-05	6.9434e-05	2.44809
GCAT	1.08911	5.42647	5.63305	1.18488e-07	1.09607e-06	6.84375
TYMS	1.08862	4.21135	6.87245	2.99699e-10	4.49263e-09	12.6945
NEURL1B	1.08832	7.05639	3.79136	0.000235754	0.00107895	-0.467179
CP	1.08826	4.96727	2.07373	0.0402392	0.0938212	-5.15878
CDCA5	1.08791	5.13011	4.54383	1.32402e-05	8.16765e-05	2.27863
SNRNP200	1.08769	4.86404	6.04056	1.76528e-08	1.92134e-07	8.70104
GOLM1	1.08696	5.01918	5.06918	1.46515e-06	1.08662e-05	4.4017
C1orf35	1.08695	5.93625	6.37597	3.51063e-09	4.31438e-08	10.281
RNF44	1.08681	5.73356	4.77015	5.2219e-06	3.48161e-05	3.17397
MAGEF1	1.0864	5.0105	6.71175	6.70321e-10	9.36874e-09	11.9042
PEG10	1.08474	4.41521	2.69557	0.00803403	0.0243364	-3.73911
LDB1	1.08443	5.74811	7.19135	5.93509e-11	9.94626e-10	14.286
CORO2A	1.08436	4.2542	5.58331	1.4878e-07	1.34348e-06	6.62212
MIR3682	1.0843	5.52016	4.40862	2.27711e-05	0.000133546	1.75839
MGME1	1.08411	7.43495	5.58909	1.44904e-07	1.3108e-06	6.64781
KCNE4	1.08381	4.85739	2.03434	0.0441168	0.101463	-5.23722
P2RX4	1.08292	4.7666	4.18308	5.49479e-05	0.000293489	0.916073
CMTM4	1.0826	5.71446	5.77247	6.22449e-08	6.13218e-07	7.47101
RAB38	1.08233	4.56493	2.97661	0.00352492	0.0119713	-2.98969
GALNT10	1.08222	5.42457	4.65315	8.4768e-06	5.42377e-05	2.70735
POGK	1.08166	4.94317	7.17671	6.39676e-11	1.06588e-09	14.2123
CCNL2	1.08122	6.71346	5.78821	5.78508e-08	5.73683e-07	7.5424
BACE2	1.08108	6.74469	3.12762	0.0022109	0.00795348	-2.56055
CORO1B	1.08077	5.4627	4.07112	8.41309e-05	0.000430694	0.510162
PIGW	1.08041	6.38385	4.77148	5.19311e-06	3.4658e-05	3.1793
CRB3	1.07989	6.84187	4.81937	4.24979e-06	2.90445e-05	3.37262
ATP13A2	1.07987	4.81997	4.87937	3.30039e-06	2.30172e-05	3.61663
ZBTB48	1.07942	5.60885	5.62977	1.20286e-07	1.11097e-06	6.82909
E4F1	1.07849	6.41428	6.5111	1.811e-09	2.3528e-08	10.9295
MAN1B1	1.07713	7.14048	6.80233	4.26223e-10	6.19856e-09	12.3487
PRRT2	1.07713	4.31118	4.07684	8.23341e-05	0.00042213	0.530709
LOC100130987	1.07564	5.92109	4.28695	3.67599e-05	0.000204898	1.29998
SPDYE2	1.07561	5.89211	6.41217	2.94199e-09	3.6662e-08	10.4541
PTPRK	1.07447	6.74163	4.33233	3.07781e-05	0.000174745	1.46986
BHLHE40	1.07446	6.22853	4.78289	4.95138e-06	3.32726e-05	3.22526
FKBP4	1.07435	4.87218	6.64904	9.15791e-10	1.2568e-08	11.5981
LINC01341	1.07412	4.88016	4.48539	1.67583e-05	0.000101335	2.0524
GPR56	1.07381	5.31949	6.47472	2.16559e-09	2.76434e-08	10.7543
JADE3	1.07268	6.89875	3.57042	0.000513352	0.00217839	-1.20026
PRO2852	1.07246	4.80849	4.44708	1.95363e-05	0.00011614	1.90526
FZD6	1.07193	5.92279	2.64912	0.00915409	0.027178	-3.85666
MPZL2	1.07148	4.76999	4.51919	1.46263e-05	8.94571e-05	2.18301
NAA25	1.06993	5.65977	6.80788	4.14535e-10	6.05325e-09	12.376
TTC6	1.06992	3.62497	3.95102	0.000131731	0.000642698	0.0840365
PVRL2	1.0695	4.99265	6.37561	3.51675e-09	4.31672e-08	10.2793
PRSS16	1.06925	3.8345	3.52564	0.000598689	0.00249753	-1.34454
MOGS	1.06861	5.52346	5.3683	3.93049e-07	3.276e-06	5.67754
ANO1	1.06811	4.40716	4.81454	4.3369e-06	2.95023e-05	3.35305
PDIK1L	1.06715	6.61089	4.39303	2.42233e-05	0.000140892	1.69916
SH3BP4	1.06715	5.66359	5.90099	3.41425e-08	3.53555e-07	8.05684
ABCC10	1.06667	6.32853	6.51044	1.81693e-09	2.35902e-08	10.9263
SH2B2	1.06666	5.68413	5.02041	1.80823e-06	1.32228e-05	4.19812
COL1A1	1.06589	7.20407	4.95109	2.43354e-06	1.74273e-05	3.91096
WNK4	1.06585	3.47492	3.3413	0.00111148	0.00430821	-1.92274
MST4	1.06575	4.76526	6.38356	3.38301e-09	4.18267e-08	10.3173
BLM	1.06535	4.45595	3.89494	0.000161911	0.000771546	-0.111587
RAD9A	1.06409	4.89487	5.15597	1.00464e-06	7.6791e-06	4.76712
PRAME	1.06264	3.31554	2.4118	0.0173863	0.0468227	-4.42871
METTL1	1.06201	5.1719	6.629	1.01153e-09	1.37345e-08	11.5006
HLA-DQB2	1.06168	3.95686	2.99236	0.00336002	0.0114741	-2.94576
C6orf141	1.06135	3.70352	2.89768	0.00446863	0.0146832	-3.20669
ARHGAP39	1.06072	4.70511	6.58507	1.25733e-09	1.68044e-08	11.2872
TBC1D9	1.06051	7.65278	2.46095	0.015277	0.0421233	-4.3142
FBXO32	1.06011	5.49613	4.19499	5.24887e-05	0.000281453	0.95976
FAM160A2	1.05862	6.39022	4.8004	4.60167e-06	3.11271e-05	3.29589
SYT17	1.05781	6.22101	2.90847	0.0043272	0.0142651	-3.17733
SDR16C5	1.0578	4.09417	2.41765	0.0171221	0.046239	-4.41517
PDDC1	1.05752	7.03506	6.25529	6.30656e-09	7.46356e-08	9.70754
EXOSC4	1.05737	7.41375	4.1455	6.34468e-05	0.000334256	0.778924
CMYA5	1.05694	4.1664	3.88189	0.000169825	0.000805132	-0.156802
EBPL	1.05691	8.62289	3.72264	0.000301355	0.00134659	-0.698965
MGAT4A	1.05628	4.54436	4.6246	9.52967e-06	6.04264e-05	2.59472
KRT6B	1.05619	5.03836	2.53769	0.0124374	0.0353612	-4.13125
ZBTB41	1.05596	7.96726	4.26248	4.04351e-05	0.000222534	1.2089
RASSF6	1.05583	4.17252	3.41683	0.000865027	0.00346315	-1.68892
C3orf14	1.05466	5.34497	5.94104	2.82762e-08	2.97169e-07	8.24088
CDC42SE1	1.05365	7.42326	7.50034	1.2053e-11	2.25438e-10	15.8549
KIF3A	1.05313	5.6308	5.98855	2.25919e-08	2.41397e-07	8.46004
ITGA2	1.05276	4.03804	3.40695	0.000894061	0.00356475	-1.71975
RAB27B	1.05266	4.49082	5.57506	1.5449e-07	1.39014e-06	6.58546
ATAD3A	1.05217	5.97311	7.37441	2.31449e-11	4.12536e-10	15.2125
HIST1H4H	1.0519	4.62752	2.8082	0.00581536	0.0184401	-3.44656
POLR2J4	1.05105	4.60632	9.2533	1.0162e-15	3.47716e-14	25.1165
NCAPD2	1.05037	6.43646	3.95614	0.000129263	0.000632163	0.101988
CXorf40B	1.05028	8.48424	3.62199	0.000429332	0.00185259	-1.03232
ATXN7L3B	1.0495	7.2878	6.52428	1.69726e-09	2.21347e-08	10.9931
APP	1.04903	8.41974	5.20232	8.20067e-07	6.40305e-06	4.96387
ST8SIA6-AS1	1.04887	4.13779	2.30093	0.0231181	0.0593977	-4.67925
TSEN54	1.04836	5.67507	8.1171	4.69834e-13	1.08758e-11	19.0534
SETD1B	1.04721	8.85227	7.93726	1.21954e-12	2.65188e-11	18.1125
ST5	1.04565	6.61136	4.6993	7.00857e-06	4.56446e-05	2.89045
CCDC24	1.04522	4.39249	5.25883	6.3935e-07	5.08646e-06	5.20528
LCMT1	1.04517	8.76114	5.62514	1.22865e-07	1.13144e-06	6.80843
CDT1	1.04406	3.87914	5.1368	1.09229e-06	8.29641e-06	4.68608
HPN	1.04379	5.22552	3.53827	0.000573368	0.00240366	-1.30402
KLF5	1.04275	5.26288	2.70764	0.00776413	0.0236237	-3.70827
EEF1A2	1.04259	4.60999	2.45274	0.0156124	0.0428691	-4.33346
LY75	1.04172	6.547	2.48282	0.0144138	0.0400835	-4.26257
TMEM200A	1.04077	5.46251	3.10789	0.00235198	0.00840925	-2.61763
EMC3-AS1	1.04065	5.31302	4.62931	9.34764e-06	5.9309e-05	2.61327
MCM5	1.04041	5.50846	4.04894	9.14564e-05	0.000464132	0.430728
FNBP1L	1.04038	9.41157	3.42022	0.00085528	0.00342682	-1.67834
TMEM9	1.03982	7.69879	4.34642	2.91195e-05	0.000165973	1.52287
PCYOX1L	1.03906	4.37089	4.85702	3.62715e-06	2.50739e-05	3.52549
SRSF6	1.03891	7.31537	5.25592	6.47613e-07	5.15019e-06	5.19283
RFX5	1.03826	6.87063	5.02263	1.7911e-06	1.31313e-05	4.20733
LINC01000	1.03819	6.16158	5.525	1.94017e-07	1.72084e-06	6.36378
RNPEP	1.03812	7.59426	3.93385	0.000140348	0.000679718	0.0239146
MTHFD2	1.03772	5.938	8.49716	6.14859e-14	1.61298e-12	21.061
ETV6	1.03763	5.1849	6.2428	6.69867e-09	7.85941e-08	9.64851
VPS37C	1.03716	7.12012	7.76005	3.10297e-12	6.31143e-11	17.1918
PMAIP1	1.03705	5.20823	2.69206	0.0081141	0.024539	-3.74806
ZNF432	1.03676	7.35827	4.60348	1.03891e-05	6.54906e-05	2.51168
KIAA0319L	1.03657	6.45438	4.86216	3.54926e-06	2.4627e-05	3.54645
MICALL2	1.03615	5.16396	7.00657	1.52195e-10	2.39187e-09	13.3602
KLHDC7B	1.036	3.52071	2.87412	0.00479227	0.0156046	-3.27048
BRMS1	1.03595	7.25773	6.13979	1.09944e-08	1.2354e-07	9.16387
THBS2	1.03562	9.03414	2.92624	0.00410314	0.0136274	-3.12874
NUP210	1.03487	4.70749	6.54695	1.51783e-09	1.99857e-08	11.1026
SAC3D1	1.03447	8.57729	5.51847	1.99861e-07	1.76731e-06	6.33492
RCAN3	1.03436	4.78918	6.37599	3.51033e-09	4.31438e-08	10.2811
HN1L	1.03408	6.20007	8.90208	6.88814e-15	2.08807e-13	23.2241
GSDMD	1.03327	6.95247	6.06533	1.56906e-08	1.71966e-07	8.81618
SGOL2	1.03324	4.28645	5.62794	1.21295e-07	1.119e-06	6.82095
ABHD17C	1.03302	5.42711	5.15822	9.94811e-07	7.62105e-06	4.77665
AGRN	1.03241	3.97366	9.03607	3.32401e-15	1.05615e-13	23.9444
CTBP2	1.0308	8.31233	7.36623	2.41442e-11	4.28852e-10	15.1709
NSUN5	1.02939	8.65536	6.92914	2.25201e-10	3.46471e-09	12.9752
LUC7L	1.02931	6.21918	5.88591	3.66463e-08	3.76813e-07	7.98778
MRPS30	1.02911	6.55736	2.35867	0.0199536	0.0526419	-4.55011
VDR	1.02889	4.68752	9.01512	3.72561e-15	1.17644e-13	23.8317
COL16A1	1.02729	7.94014	3.76309	0.000260905	0.00118399	-0.562936
BANF1	1.02724	9.10393	5.39964	3.41602e-07	2.88123e-06	5.81382
YTHDF1	1.02667	9.05399	7.15273	7.23138e-11	1.19041e-09	14.0917
REPS2	1.02561	4.25036	3.12737	0.00221261	0.00795684	-2.56126
MAP7	1.02433	5.67758	5.15024	1.03011e-06	7.85327e-06	4.74286
USP21	1.02392	6.13838	3.81791	0.000214251	0.000990065	-0.376761
MATR3	1.0238	4.54282	3.70431	0.000321572	0.00142702	-0.760196
BRD2	1.02377	7.80339	7.8118	2.36377e-12	4.92541e-11	17.46
TRAF4	1.02345	4.50391	6.77609	4.861e-10	6.96539e-09	12.2196
ZNF281	1.02322	8.11026	5.52221	1.96498e-07	1.74058e-06	6.35143
RUVBL1	1.02288	5.71845	4.02999	9.8193e-05	0.000494761	0.363138
GALE	1.02268	4.95206	6.59718	1.18421e-09	1.58789e-08	11.346
RRS1	1.02239	7.27219	5.05723	1.54283e-06	1.13927e-05	4.35171
RSAD2	1.02043	4.97636	2.64489	0.00926286	0.0274253	-3.86728
SCYL3	1.01997	6.86203	5.88542	3.67315e-08	3.7731e-07	7.98551
FEN1	1.01996	6.1565	4.40558	2.30474e-05	0.000134973	1.74683
COL27A1	1.01992	4.67423	5.16821	9.52307e-07	7.32836e-06	4.81896
SDF2L1	1.01972	6.24576	5.29361	5.48111e-07	4.42598e-06	5.35468
SLC44A3	1.01841	3.70804	3.38883	0.000949701	0.00375949	-1.7761
KIAA1804	1.01796	3.8469	3.305	0.00125206	0.00479139	-2.03359
NOXA1	1.01735	5.89247	5.52708	1.92193e-07	1.70688e-06	6.37298
KIF15	1.01552	3.57369	3.23995	0.0015463	0.00578645	-2.22965
PAQR6	1.01543	3.53242	3.91377	0.000151108	0.000725987	-0.0461377
GORAB	1.01525	5.44602	5.34138	4.43235e-07	3.66295e-06	5.56084
TTC14	1.01437	5.89205	5.0999	1.28251e-06	9.64455e-06	4.53059
TSTD1	1.01412	9.96483	3.81018	0.000220312	0.00101555	-0.40314
PRKX	1.0138	4.22296	3.24611	0.00151592	0.00568943	-2.21125
MTG1	1.01358	6.23852	4.65225	8.50835e-06	5.44195e-05	2.70378
SP6	1.01342	4.17399	5.08185	1.38699e-06	1.03579e-05	4.45477
CDH11	1.01249	5.22473	3.70326	0.000322768	0.0014314	-0.763695
KCNN4	1.01212	4.13108	2.60634	0.0103088	0.030087	-3.96335
SRD5A1	1.01202	5.18179	2.83925	0.00531101	0.0170469	-3.36409
TNC	1.01083	4.73225	3.61181	0.000444815	0.00191335	-1.06563
ZNF767P	1.00994	5.0426	5.76966	6.30619e-08	6.2067e-07	7.4583
PPFIA3	1.0098	4.7494	4.98783	2.07974e-06	1.50427e-05	4.06283
CAPN13	1.0087	4.10208	4.59365	1.0814e-05	6.78346e-05	2.47314
FADD	1.00776	5.95086	3.95152	0.000131487	0.000641816	0.0857929
LOC100289019	1.00768	4.17905	5.60451	1.35038e-07	1.22861e-06	6.71646
RALY	1.0076	8.77216	6.48296	2.07967e-09	2.67301e-08	10.7939
LSG1	1.00753	6.67281	6.91795	2.38288e-10	3.66055e-09	12.9197
FBXO45	1.00729	5.98489	6.56205	1.4088e-09	1.87431e-08	11.1757
EMP2	1.00719	7.11933	4.73635	6.01092e-06	3.95611e-05	3.03836
GOLGA2P5	1.00689	4.50454	6.15411	1.02649e-08	1.16366e-07	9.231
KDM4B	1.0064	5.52997	6.87913	2.8979e-10	4.36649e-09	12.7275
SLC11A2	1.00634	5.15441	10.3797	2.0713e-18	1.03373e-16	31.2497
ZNF207	1.00611	5.8952	7.4052	1.97391e-11	3.55861e-10	15.3692
ADNP	1.00563	8.20927	5.52612	1.93037e-07	1.71363e-06	6.36871
KCNK6	1.00461	4.51924	3.62443	0.000425694	0.00183883	-1.02432
NINL	1.00438	5.6217	4.62309	9.58879e-06	6.0763e-05	2.58877
FBP1	1.00317	7.16552	2.09629	0.0381531	0.0898582	-5.11323
FGD3	1.00298	5.16281	3.58035	0.000496061	0.0021129	-1.16809
SAMD12	1.00287	4.46974	5.68285	9.42378e-08	8.938e-07	7.06679
TP53BP2	1.00234	6.52825	3.47912	0.000701408	0.00287735	-1.49287
HAGHL	1.00211	5.92826	5.38085	3.71593e-07	3.1111e-06	5.73206
PCNA	1.00194	9.25545	4.70871	6.74099e-06	4.40122e-05	2.92793
TES	1.00188	5.86464	6.21931	7.50268e-09	8.75755e-08	9.53761
MSI2	1.00126	4.62856	6.14639	1.06517e-08	1.20473e-07	9.19483
NR2C2AP	1.00126	5.69485	5.70311	8.58294e-08	8.21825e-07	7.15785
LOC100129917	1.0012	3.53005	4.3595	2.76565e-05	0.000158562	1.57222
SMC4	1.00082	5.35	5.7565	6.70362e-08	6.56313e-07	7.39871
F11R	1.00062	7.53093	5.59209	1.42929e-07	1.29465e-06	6.66116
AGAP4	1.00029	5.1127	5.96747	2.49603e-08	2.63947e-07	8.36267
NRIP3	0.999988	4.39165	2.47472	0.0147282	0.0408302	-4.28174
WDR52	0.999553	3.91953	4.88997	3.15553e-06	2.21352e-05	3.65997
ARRDC1	0.99937	4.55982	8.50758	5.81334e-14	1.54045e-12	21.1164
SLC4A2	0.999023	6.09208	5.29968	5.33556e-07	4.3221e-06	5.3808
TMEM45A	0.999015	7.48897	2.55689	0.0118057	0.0338	-4.08471
NONO	0.998813	8.47948	6.05243	1.66837e-08	1.82363e-07	8.75621
ZNF444	0.998379	6.2322	6.06568	1.56643e-08	1.71771e-07	8.81782
PPM1J	0.997257	4.41045	3.89529	0.000161708	0.000770757	-0.110397
HCRP1	0.997195	4.02418	5.59187	1.43073e-07	1.29538e-06	6.66019
PAPD4	0.996615	6.21314	4.81775	4.27879e-06	2.92134e-05	3.36606
CASZ1	0.99614	4.48858	7.46821	1.42413e-11	2.63001e-10	15.6906
TTI1	0.994996	6.5358	4.86552	3.49937e-06	2.4322e-05	3.56011
EPHB3	0.994977	4.82392	4.58027	1.14198e-05	7.1307e-05	2.42074
STK11IP	0.994894	5.58974	6.89938	2.6168e-10	3.97513e-09	12.8277
KIAA1217	0.994214	4.84391	7.47005	1.41056e-11	2.6073e-10	15.7
DSC2	0.993863	4.92989	2.95882	0.00371994	0.0125234	-3.03903
LOC102724275	0.993311	3.75527	3.91	0.000153219	0.000735602	-0.0592898
PPP1R26	0.993108	6.40641	4.96712	2.27251e-06	1.63617e-05	3.97713
ZNF83	0.992772	6.11755	4.90652	2.94183e-06	2.075e-05	3.72769
IRX2	0.992064	4.20223	3.75267	0.000270802	0.00122348	-0.598091
RBM10	0.991726	7.42345	6.60127	1.16048e-09	1.56016e-08	11.3659
QSOX1	0.98921	4.54558	4.40125	2.3447e-05	0.000137039	1.73036
DNAJC7	0.989107	6.18219	7.02631	1.37692e-10	2.17228e-09	13.4586
SBSPON	0.988737	4.061	2.24978	0.0262823	0.0660349	-4.79122
PLEKHS1	0.988506	3.88189	3.50333	0.000646031	0.00267647	-1.41586
THOP1	0.988243	4.66712	5.61804	1.2693e-07	1.16678e-06	6.77674
ATG101	0.987782	7.06014	3.81108	0.0002196	0.00101249	-0.400078
SMS	0.986243	8.82426	4.2938	3.57901e-05	0.000200202	1.32554
SEPHS2	0.983799	9.87463	4.24409	4.3426e-05	0.00023778	1.14072
ITGA3	0.983747	4.64416	4.17311	5.70893e-05	0.000303734	0.879604
SMARCC1	0.983364	6.23219	8.28168	1.95311e-13	4.74639e-12	19.9198
RHNO1	0.982703	4.2139	4.91075	2.88939e-06	2.03942e-05	3.74507
SLC35B1	0.982483	6.9764	2.81188	0.00575347	0.0182693	-3.43684
SGSM2	0.98244	5.68369	5.77512	6.14826e-08	6.06001e-07	7.48303
CHSY1	0.982051	9.99256	6.22765	7.20689e-09	8.43635e-08	9.57696
HLA-F	0.981975	7.65035	3.46977	0.000723945	0.00295617	-1.52247
COG2	0.981863	5.6487	6.91465	2.42289e-10	3.71365e-09	12.9033
GNPNAT1	0.98172	8.36806	4.8259	4.13485e-06	2.83442e-05	3.39907
SLC22A18	0.980464	5.67274	3.47646	0.00070775	0.00289813	-1.5013
B3GALNT1	0.980334	4.30859	5.34086	4.44266e-07	3.67e-06	5.55859
MST1	0.979524	4.94497	4.34824	2.8911e-05	0.00016506	1.52975
SHMT2	0.979353	6.8679	4.2925	3.59724e-05	0.000201002	1.32069
SHB	0.979078	4.12993	8.04273	6.97527e-13	1.57536e-11	18.6636
SSR2	0.97785	10.5814	5.5101	2.07594e-07	1.83163e-06	6.29799
POLR1C	0.977564	6.10857	5.67777	9.64683e-08	9.13859e-07	7.044
RORC	0.977175	3.78452	5.05995	1.52484e-06	1.12722e-05	4.36305
NEK8	0.976858	6.57135	4.23479	4.50177e-05	0.000245641	1.10634
PPT1	0.976852	10.1282	4.27393	3.86728e-05	0.000214103	1.25149
GINS2	0.976764	4.49586	8.807	1.15377e-14	3.37747e-13	22.7142
MKI67	0.976486	4.44905	4.70653	6.80202e-06	4.43965e-05	2.91925
MYO10	0.976081	4.6371	4.77602	5.09566e-06	3.4052e-05	3.19757
F2RL2	0.9746	3.79829	4.76881	5.25121e-06	3.49773e-05	3.16858
ANK3	0.972213	5.11989	5.78815	5.78673e-08	5.73683e-07	7.54212
CPNE1	0.971831	7.63126	4.68815	7.33896e-06	4.75823e-05	2.84609
DPCD	0.971438	6.86192	3.83454	0.000201743	0.000937984	-0.319858
H1F0	0.971375	7.77224	3.5302	0.000589423	0.0024644	-1.32991
PRCC	0.971198	6.63429	3.99994	0.000109858	0.000548274	0.256444
CLNS1A	0.971101	7.71437	5.20078	8.2561e-07	6.43812e-06	4.95734
C17orf96	0.970916	4.53871	2.61779	0.00998749	0.0292911	-3.93494
UBQLN4	0.969609	6.93803	8.67623	2.34132e-14	6.58983e-13	22.0148
SEC14L1P1	0.968703	4.79064	5.02033	1.80888e-06	1.32228e-05	4.19778
FRAT2	0.968433	5.20181	4.5193	1.46201e-05	8.94571e-05	2.18342
ZYG11A	0.967742	3.43673	3.72728	0.000296425	0.00132694	-0.683407
SUSD2	0.967524	4.05543	4.28379	3.72153e-05	0.000206985	1.28821
PCAT6	0.967032	5.76866	3.19064	0.00181104	0.00666741	-2.37611
C17orf62	0.966278	8.99826	4.18307	5.49484e-05	0.000293489	0.916064
SUDS3	0.966229	6.92307	3.95064	0.000131916	0.000643139	0.082707
CHD8	0.964805	6.73042	7.47009	1.41028e-11	2.6073e-10	15.7002
SYT13	0.962547	3.5699	2.4876	0.0142312	0.0396244	-4.25124
MZB1	0.962016	5.46821	2.22795	0.0277435	0.0690619	-4.83829
ACP5	0.961035	6.06926	2.47799	0.0146005	0.0405629	-4.27401
SNAPC4	0.960953	5.38923	5.78198	5.95537e-08	5.88121e-07	7.51411
SPATS2	0.960849	4.91464	9.24278	1.07638e-15	3.65254e-14	25.0596
RAB6A	0.958824	4.19633	4.32524	3.16468e-05	0.000179329	1.44323
BCL11A	0.958673	4.05564	2.2882	0.0238724	0.0609783	-4.70733
ULK3	0.958461	5.21598	5.35187	4.2298e-07	3.50974e-06	5.60626
HHAT	0.957785	6.01986	5.40681	3.30794e-07	2.80278e-06	5.84505
FKBP11	0.956474	6.79025	4.30485	3.4278e-05	0.000192639	1.36683
PPRC1	0.955997	6.29421	5.92525	3.04604e-08	3.18162e-07	8.16824
MIR34A	0.955899	5.61485	8.28389	1.93011e-13	4.70166e-12	19.9315
CCNO	0.95494	3.50505	3.25893	0.00145438	0.00547857	-2.17278
THEM6	0.953921	4.46423	3.23216	0.00158559	0.00591726	-2.25293
TMEM54	0.953693	4.69192	3.40408	0.000902657	0.00359132	-1.72868
ACTL6A	0.953602	8.04874	4.51725	1.47414e-05	9.0038e-05	2.17549
IFI44	0.953131	5.4694	2.31448	0.0223383	0.0577444	-4.64921
CAPS	0.952905	4.93467	4.28223	3.74425e-05	0.000208136	1.28239
PTK6	0.952415	4.07773	4.78208	4.96824e-06	3.33421e-05	3.22198
RAB3D	0.952403	4.76027	7.49835	1.2178e-11	2.2736e-10	15.8447
SSRP1	0.951891	7.53968	5.80222	5.41981e-08	5.40449e-07	7.606
PCGF2	0.951885	5.54388	3.85103	0.000190032	0.000888582	-0.263264
DUS1L	0.950977	8.2305	4.88728	3.19168e-06	2.23658e-05	3.64897
SEMA3F	0.95073	5.63479	6.26002	6.16407e-09	7.31184e-08	9.7299
HLA-B	0.950497	10.6911	2.72071	0.00748098	0.0229214	-3.67472
ZNF48	0.949617	6.05057	8.1618	3.70345e-13	8.67048e-12	19.2882
LRRC56	0.948994	5.19797	5.87718	3.81788e-08	3.9139e-07	7.9478
RAD54B	0.948617	4.48918	3.97815	0.000119137	0.000589118	0.179424
SCO2	0.946978	9.17653	4.16691	5.84616e-05	0.000310631	0.856949
SECTM1	0.946906	4.97846	2.92689	0.00409522	0.0136055	-3.12697
LOC80154	0.945921	5.20678	6.9131	2.44191e-10	3.74e-09	12.8956
KDF1	0.945213	5.31734	6.54365	1.54269e-09	2.0261e-08	11.0867
R3HDM4	0.944964	6.53841	5.09236	1.32519e-06	9.92533e-06	4.4989
PPP1R13B	0.944031	6.3842	4.79224	4.76167e-06	3.20927e-05	3.26293
ALDH8A1	0.943875	3.74675	2.95079	0.00381125	0.0127951	-3.06123
HNRNPAB	0.943275	9.98266	4.34925	2.87959e-05	0.000164504	1.53357
SALL4	0.943205	5.16976	4.05279	9.0143e-05	0.000457641	0.444487
HLA-C	0.941616	10.9619	3.45156	0.000769841	0.00311684	-1.57997
DDX17	0.941412	7.69211	5.89705	3.478e-08	3.58704e-07	8.03879
THSD4	0.941339	3.87644	4.80219	4.56724e-06	3.09351e-05	3.30314
SLC22A15	0.939789	3.69667	3.74149	0.000281815	0.0012682	-0.635718
TMEM154	0.939682	5.81797	3.59912	0.000464849	0.0019924	-1.10704
GAK	0.939558	8.31722	6.4503	2.44116e-09	3.09295e-08	10.6369
DCBLD1	0.93947	5.94581	4.81592	4.31185e-06	2.93999e-05	3.35864
UBAP2L	0.93832	6.19753	7.03237	1.33515e-10	2.11291e-09	13.4888
TLE3	0.937501	5.81403	5.70205	8.62474e-08	8.25056e-07	7.15312
RBM39	0.93698	9.04902	7.17215	6.54801e-11	1.0877e-09	14.1893
ZNF750	0.93638	3.35195	3.51542	0.000619953	0.00257704	-1.37725
YARS	0.936367	6.71744	6.10609	1.2918e-08	1.43578e-07	9.00623
FAM98C	0.935641	5.83222	3.85682	0.000186074	0.000871103	-0.243338
CLDN12	0.935557	6.55018	4.2709	3.91326e-05	0.000216355	1.24019
ATP2C2	0.934689	4.66786	5.43523	2.91135e-07	2.49569e-06	5.96916
YY1AP1	0.934383	8.80362	5.65015	1.09538e-07	1.01973e-06	6.92024
KRT7	0.934282	3.79788	5.85163	4.30323e-08	4.3742e-07	7.83103
PAXIP1	0.93392	6.89678	4.65219	8.51052e-06	5.44195e-05	2.70353
UBE2L6	0.933048	8.87114	3.03561	0.00294338	0.0102399	-2.82418
RHBDD3	0.932518	6.73207	7.4312	1.7253e-11	3.13805e-10	15.5017
C14orf80	0.932022	5.09195	5.65678	1.06253e-07	9.93217e-07	6.9499
SND1-IT1	0.930174	4.41317	5.34619	4.33834e-07	3.59252e-06	5.58166
H2AFY	0.929594	6.96754	7.71997	3.8295e-12	7.68228e-11	16.9844
MTL5	0.92953	3.29204	5.36966	3.90675e-07	3.25754e-06	5.68342
CDR2L	0.929451	6.3289	4.09549	7.67311e-05	0.000396282	0.597805
TXNDC11	0.929014	7.23382	5.46179	2.58295e-07	2.23666e-06	6.0855
SMARCD2	0.928854	7.42371	4.89545	3.08316e-06	2.16572e-05	3.68237
PIAS4	0.92782	5.5324	6.48026	2.10745e-09	2.70023e-08	10.7809
COL18A1	0.926446	7.54703	4.63808	9.01793e-06	5.73059e-05	2.64781
POLE	0.925851	5.49911	4.96425	2.30059e-06	1.65454e-05	3.96526
ARSG	0.925207	4.43112	3.407	0.000893904	0.00356475	-1.71959
TCF19	0.92513	5.34532	5.23611	7.06775e-07	5.57518e-06	5.10804
COL9A3	0.924554	4.96494	2.31117	0.0225265	0.0581019	-4.65656
PRRC1	0.924065	7.19798	4.45914	1.86176e-05	0.00011113	1.95146
SLC39A7	0.923845	6.38077	4.37295	2.62266e-05	0.000151169	1.62305
IER5	0.92372	8.25673	4.08279	8.0505e-05	0.000413784	0.552093
CHI3L1	0.922563	5.63903	2.12563	0.0355799	0.0847332	-5.05331
CASP6	0.922238	7.48697	5.40884	3.27792e-07	2.77964e-06	5.85391
FAM46C	0.921692	5.31349	3.03632	0.00293695	0.0102231	-2.82217
DONSON	0.921201	5.99033	4.0046	0.000107968	0.00053976	0.272938
WNT5A	0.92087	5.87402	2.16237	0.0325699	0.0787574	-4.97717
NXN	0.920015	8.12043	3.21387	0.0016815	0.00622861	-2.30737
TMEM184A	0.919944	4.67313	4.30265	3.45742e-05	0.000194037	1.3586
SLCO2A1	0.919654	6.17839	3.38135	0.000973607	0.00384075	-1.79929
PMM2	0.918311	7.35768	5.00847	1.90354e-06	1.38613e-05	4.14844
APOA1BP	0.91826	9.08953	3.3118	0.00122449	0.00470085	-2.01288
RALGPS2	0.918233	4.82941	4.80787	4.45983e-06	3.02476e-05	3.32609
SFPQ	0.918211	7.28803	7.35516	2.55653e-11	4.52916e-10	15.1146
CHST15	0.917969	5.12045	5.85701	4.19626e-08	4.28036e-07	7.85559
LOC441124	0.917562	4.32008	5.48639	2.31125e-07	2.02019e-06	6.19357
QPRT	0.916789	6.08382	2.14171	0.0342344	0.0820262	-5.02014
WDR73	0.916448	7.19518	5.91864	3.14231e-08	3.27216e-07	8.13786
YIF1A	0.916417	8.06767	3.51416	0.00062263	0.00258685	-1.38129
PRPF38B	0.916399	6.53032	6.34955	3.9927e-09	4.85614e-08	10.155
MZT2B	0.915939	8.50162	3.96809	0.000123668	0.000609172	0.143984
EFHC1	0.915573	5.04048	4.60806	1.01968e-05	6.43116e-05	2.52965
C1orf226	0.915497	3.94974	2.81974	0.00562312	0.0179138	-3.41602
HIST1H4J	0.915356	7.52288	2.6605	0.00886746	0.0264576	-3.82804
COMTD1	0.915339	6.41032	4.47953	1.71566e-05	0.000103131	2.02986
HIST3H2A	0.913825	4.47503	4.27786	3.80856e-05	0.000211236	1.26611
LOC339988	0.913575	5.10324	5.68279	9.42636e-08	8.938e-07	7.06653
TESK2	0.913373	4.88638	3.65863	0.000377724	0.00165185	-0.911818
PSMD3	0.913064	6.24685	2.97339	0.00355944	0.0120645	-2.99862
LINC00537	0.912813	4.08284	4.59354	1.08192e-05	6.78363e-05	2.47268
SLC4A11	0.912751	4.6438	3.24414	0.00152559	0.00571629	-2.21715
MEX3A	0.912368	5.72259	4.51108	1.51128e-05	9.20899e-05	2.1516
ARPC5L	0.911365	8.29318	5.38663	3.6211e-07	3.03792e-06	5.75718
CYFIP2	0.911274	5.24305	3.22167	0.00163996	0.00609129	-2.28419
EPS8L2	0.911259	4.07304	9.68334	9.62007e-17	3.79931e-15	27.4491
C16orf93	0.911189	4.999	5.39625	3.46832e-07	2.92173e-06	5.79905
OVOL1	0.911103	3.87343	6.4458	2.49554e-09	3.15208e-08	10.6153
LCN2	0.910845	3.9026	2.05995	0.0415615	0.0964266	-5.18639
ZBTB5	0.909892	6.05774	5.23278	7.1723e-07	5.64895e-06	5.09379
VOPP1	0.909876	8.71636	3.99404	0.000112301	0.000558965	0.235551
PTP4A3	0.909416	4.85957	4.75719	5.51188e-06	3.65115e-05	3.12188
PRRC2A	0.909304	6.2793	5.68867	9.17408e-08	8.73929e-07	7.09296
CRELD2	0.909115	9.00775	4.64866	8.63453e-06	5.5159e-05	2.68961
BPIFB1	0.908796	3.19027	2.11015	0.0369187	0.0873936	-5.08503
ZNF251	0.908203	5.79094	4.6574	8.32992e-06	5.33647e-05	2.72417
CTSH	0.907892	10.374	3.6153	0.000439439	0.00189261	-1.0542
2019-09-09	0.907746	5.91681	7.84986	1.93441e-12	4.06519e-11	17.6576
NOP58	0.907394	10.3008	5.84193	4.50308e-08	4.56567e-07	7.78674
NTHL1	0.906737	6.55353	4.76702	5.29052e-06	3.51933e-05	3.16139
ZDHHC23	0.906321	3.31031	4.08386	8.01803e-05	0.000412431	0.55594
POLE2	0.906291	3.80773	4.51013	1.51704e-05	9.23858e-05	2.14795
PSMB8	0.90612	7.19253	2.12549	0.0355915	0.084742	-5.05359
CCNA2	0.905768	4.21769	4.44656	1.95776e-05	0.000116351	1.90324
DDX41	0.905654	8.2157	3.86285	0.000182036	0.000854119	-0.222564
ORC2	0.903093	5.58171	5.75179	6.85165e-08	6.68248e-07	7.37742
PLEKHG4	0.902271	4.6825	3.67152	0.000360998	0.00158786	-0.869169
ZNF606	0.901905	5.74461	4.51604	1.48137e-05	9.04288e-05	2.17079
DCAF7	0.901582	4.97095	8.11709	4.69859e-13	1.08758e-11	19.0534
TIA1	0.9008	6.39182	6.62083	1.05334e-09	1.42455e-08	11.4609
PAK6	0.900758	3.59701	4.02757	9.90887e-05	0.000498906	0.354505
TMEM63A	0.900304	5.03663	6.5399	1.57148e-09	2.06125e-08	11.0686
MBOAT7	0.899872	5.24562	6.87738	2.92358e-10	4.40193e-09	12.7188
SLC30A8	0.899872	3.11749	2.14435	0.0340178	0.0816604	-5.01468
LINGO1	0.899757	5.32365	3.18783	0.00182735	0.00672019	-2.38441
MYBL1	0.899051	5.546	3.57245	0.000509782	0.00216459	-1.19371
LOC284837	0.899046	4.63185	3.3938	0.000934128	0.00370429	-1.76067
CCAR1	0.898381	7.02528	6.02985	1.85747e-08	2.0159e-07	8.6513
ENTPD6	0.897618	5.73248	6.37578	3.51383e-09	4.31572e-08	10.2801
MYEF2	0.896866	3.9768	5.43757	2.88084e-07	2.47264e-06	5.9794
H1FX	0.896292	8.36199	4.31674	3.27181e-05	0.000184892	1.41138
RHBDF1	0.896154	4.33085	6.46189	2.30629e-09	2.93113e-08	10.6926
GMDS	0.895738	5.51405	4.54313	1.32776e-05	8.18827e-05	2.27592
THOC6	0.89543	4.38032	4.81149	4.39268e-06	2.98417e-05	3.34072
CLN3	0.895111	5.99489	3.88989	0.00016493	0.000784108	-0.129095
MIR205HG	0.894867	3.21857	2.99803	0.00330255	0.0113118	-2.92993
AHSA2	0.893509	6.17045	4.47522	1.74562e-05	0.000104748	2.01325
PABPN1	0.893037	4.93378	5.66256	1.03464e-07	9.71582e-07	6.97581
ATPIF1	0.892959	8.03821	5.4665	2.52853e-07	2.19325e-06	6.1062
IRF1	0.892098	6.66363	2.66561	0.00874144	0.0261387	-3.81516
MALAT1	0.891991	10.3564	4.5704	1.18874e-05	7.39558e-05	2.38218
MATN3	0.891513	3.45369	3.10009	0.00241007	0.00858099	-2.64014
NREP	0.891161	4.87755	6.72939	6.13868e-10	8.6402e-09	11.9906
ETNK2	0.889862	4.00012	3.40464	0.000900997	0.00358681	-1.72696
IFITM1	0.889583	9.79915	2.98546	0.00343133	0.0116903	-2.96502
GTF2IRD1	0.888764	4.64826	4.7865	4.87737e-06	3.28184e-05	3.23978
MZF1	0.888561	5.77732	5.11806	1.1852e-06	8.96217e-06	4.60701
WDR90	0.888175	4.50645	9.76631	6.09581e-17	2.48967e-15	27.9007
SSBP3-AS1	0.88798	5.12395	4.65957	8.25622e-06	5.29422e-05	2.73273
PUF60	0.887736	8.17845	3.9842	0.000116487	0.000577553	0.200788
RDH13	0.887682	4.81364	7.6402	5.81443e-12	1.13852e-10	16.5729
TSEN34	0.886946	8.08126	4.47468	1.74936e-05	0.000104941	2.0112
MAP3K1	0.885807	6.75177	3.76535	0.000258806	0.00117577	-0.555309
PNPLA6	0.885238	6.21312	5.02189	1.79678e-06	1.31541e-05	4.20427
GTF2H4	0.884154	3.97794	4.44795	1.94687e-05	0.000115805	1.90859
PAN2	0.882968	6.54368	3.62879	0.000419274	0.0018134	-1.01002
FCGBP	0.882876	6.51386	2.46106	0.0152722	0.0421216	-4.31393
TELO2	0.882793	5.18135	6.54477	1.53418e-09	2.01789e-08	11.0921
SNRPA1	0.882548	7.11087	5.58669	1.465e-07	1.32406e-06	6.63715
INADL	0.88203	4.03837	6.71496	6.59681e-10	9.23914e-09	11.9199
SLC25A39	0.88191	6.148	3.69447	0.000332955	0.00147371	-0.792984
GTF2IRD2	0.881423	6.48642	4.39475	2.40584e-05	0.000140171	1.7057
MTMR4	0.881211	7.50116	4.44814	1.9454e-05	0.000115751	1.90931
RPL39L	0.880629	4.02311	3.53968	0.000570596	0.00239351	-1.29947
ARSD	0.880232	5.74498	5.17991	9.04767e-07	6.99673e-06	4.86859
LBH	0.879737	6.58711	3.58039	0.000495996	0.0021129	-1.16797
JARID2	0.879524	5.70034	8.98693	4.34322e-15	1.35681e-13	23.68
HS3ST3A1	0.879244	5.47951	3.24038	0.00154418	0.00578066	-2.22838
FZD3	0.879074	4.04145	3.90919	0.000153672	0.000737267	-0.0620898
SCG5	0.879003	4.68075	2.24095	0.0268649	0.0672674	-4.8103
LRRC8D	0.877941	8.04684	4.40458	2.31388e-05	0.00013547	1.74304
CACFD1	0.877034	6.28204	5.84922	4.35203e-08	4.42161e-07	7.82003
DSG2	0.876956	6.21068	3.37455	0.000995836	0.00391861	-1.82035
MORC2	0.876099	6.38131	6.25405	6.34455e-09	7.50417e-08	9.70166
BANP	0.87602	8.09932	4.81556	4.31842e-06	2.94196e-05	3.35717
SALL2	0.875839	5.21664	3.23132	0.0015899	0.00593117	-2.25544
METRN	0.875477	4.45904	4.22531	4.6699e-05	0.000253732	1.07132
SKIV2L	0.874776	5.9917	5.9348	2.91203e-08	3.05099e-07	8.21216
KIF16B	0.874727	5.68213	3.30373	0.00125723	0.00480851	-2.03742
FLJ35934	0.874314	4.83089	4.84911	3.75009e-06	2.58452e-05	3.49332
STC1	0.874255	4.18076	2.54874	0.0120701	0.0344701	-4.10449
GDAP1	0.874087	4.25946	2.73933	0.00709406	0.0218909	-3.62671
TOMM40	0.874036	7.51931	6.72563	6.2551e-10	8.78544e-09	11.9721
SLC4A8	0.873253	3.92197	4.52459	1.43112e-05	8.77276e-05	2.20393
ASRGL1	0.872915	4.65813	2.47684	0.0146456	0.0406509	-4.27674
GALNT14	0.872569	3.38116	3.04884	0.00282576	0.00987208	-2.78668
KRI1	0.871669	5.69261	5.15394	1.01361e-06	7.73608e-06	4.75851
RAPH1	0.871293	6.61386	4.75788	5.49614e-06	3.64427e-05	3.12464
TPD52L1	0.871265	6.17379	2.72424	0.00740629	0.0227174	-3.66566
TMEM123	0.870987	9.77986	3.41077	0.000882717	0.0035257	-1.70783
SEC23B	0.870814	7.08999	3.94267	0.000135856	0.000660934	0.0547765
SDSL	0.870154	5.82077	3.34394	0.00110188	0.00427991	-1.91466
DNMT3A	0.869822	5.01575	6.91529	2.41506e-10	3.70443e-09	12.9065
ITPA	0.868676	6.92941	4.52162	1.44839e-05	8.87331e-05	2.19241
IKBKB	0.868486	4.92254	5.16328	9.73062e-07	7.46842e-06	4.79807
UBN1	0.8684	7.52485	8.3081	1.69565e-13	4.16522e-12	20.0593
LEF1	0.867784	3.54897	5.32607	4.74519e-07	3.89631e-06	5.49463
SLAMF8	0.867672	4.41833	2.44955	0.0157446	0.0431683	-4.34094
GRTP1	0.866919	4.5659	4.77398	5.13918e-06	3.43205e-05	3.18937
FAM185A	0.865915	4.08484	6.68318	7.72829e-10	1.07138e-08	11.7646
ZNF205	0.865857	4.40862	5.0668	1.48032e-06	1.09668e-05	4.39174
NCAPG2	0.865652	5.16532	4.82108	4.21937e-06	2.88812e-05	3.37955
LOC145837	0.864817	3.35716	2.58075	0.0110606	0.0319754	-4.0264
APEX2	0.864419	4.77299	5.37485	3.81716e-07	3.18803e-06	5.70596
BRI3BP	0.864315	6.99234	3.44021	0.000799809	0.00322477	-1.61568
LINC01355	0.864146	3.34719	4.47401	1.75408e-05	0.000105101	2.00861
INTS8	0.863907	8.36801	4.54532	1.31603e-05	8.12325e-05	2.28444
PAICS	0.863747	6.30589	5.74748	6.99006e-08	6.8045e-07	7.35793
RFWD3	0.863441	5.66417	5.93543	2.90339e-08	3.0435e-07	8.21506
TSPYL4	0.863304	7.9857	4.05798	8.84012e-05	0.000449519	0.46305
MRPL14	0.863138	9.24264	3.7594	0.000264366	0.00119811	-0.575381
KANSL2	0.862029	6.21032	4.4385	2.02174e-05	0.000119736	1.87241
CCNF	0.861931	4.15244	7.09514	9.70203e-11	1.57184e-09	13.8027
NAT9	0.861597	6.24743	5.41348	3.21031e-07	2.72683e-06	5.87416
ITFG2	0.861263	5.9307	5.89684	3.4814e-08	3.58873e-07	8.03784
CCDC130	0.861091	6.71179	6.37735	3.48712e-09	4.29323e-08	10.2876
KCTD3	0.860501	7.82953	2.93841	0.00395602	0.0132203	-3.09535
RET	0.860382	4.00767	2.69172	0.00812201	0.0245556	-3.74893
IDH2	0.860294	6.636	3.38972	0.000946904	0.00374914	-1.77335
PROM2	0.859825	4.2232	9.1314	1.97716e-15	6.44213e-14	24.4582
TCTEX1D2	0.859456	5.64569	4.44907	1.93824e-05	0.000115426	1.91285
CLASRP	0.858922	7.00814	5.54478	1.77342e-07	1.58255e-06	6.45121
SPDL1	0.858892	4.57592	3.87189	0.000176135	0.000829668	-0.191361
HSPB1	0.858354	10.8627	2.04525	0.0430123	0.0992913	-5.21564
ENAH	0.857714	6.06678	4.81603	4.30991e-06	2.93965e-05	3.35907
FDXR	0.857309	4.94785	4.5736	1.17338e-05	7.30666e-05	2.39468
LAMP5	0.857277	4.04478	3.2669	0.00141735	0.00535583	-2.14883
SRPRB	0.857002	6.753	4.26792	3.95889e-05	0.000218642	1.22911
SLC29A3	0.856648	4.69103	3.18794	0.00182673	0.00672019	-2.3841
CCDC64	0.856608	4.38428	6.59343	1.20641e-09	1.61555e-08	11.3278
CCDC85C	0.856205	5.33582	9.73696	7.16378e-17	2.88768e-15	27.7409
ZNF493	0.856193	4.88141	5.98308	2.3184e-08	2.47079e-07	8.43477
KIAA0556	0.856165	6.54177	5.81497	5.10721e-08	5.12273e-07	7.66394
ABHD2	0.855333	4.81121	3.89058	0.000164516	0.000782503	-0.126713
EIF4A3	0.855157	9.35378	3.92008	0.000147648	0.000711197	-0.0241705
SEPT7P2	0.855145	5.22369	5.39319	3.51622e-07	2.95721e-06	5.78573
GLTSCR1	0.855092	6.85347	6.68102	7.81173e-10	1.08075e-08	11.7541
ZMYND8	0.854798	5.36137	5.25042	6.63553e-07	5.26468e-06	5.16924
TC2N	0.85459	5.20251	3.9444	0.000134994	0.00065721	0.0608153
DNAJB2	0.85447	7.5433	5.0969	1.29935e-06	9.75207e-06	4.51797
TRIM27	0.853503	5.99515	5.05782	1.53894e-06	1.13681e-05	4.35415
CMTM8	0.853311	5.08247	2.66532	0.00874853	0.0261523	-3.81589
PARN	0.853029	7.60007	3.4828	0.000692698	0.0028479	-1.48118
EPB41L5	0.852517	4.53243	4.36213	2.73713e-05	0.000157103	1.58214
DPM2	0.851464	6.05243	4.84683	3.78635e-06	2.60775e-05	3.48403
ALYREF	0.851434	6.92752	2.83392	0.00539467	0.0172775	-3.37831
TMEM79	0.851198	5.07707	4.64471	8.77584e-06	5.59238e-05	2.67399
GMPPA	0.850613	6.26823	4.03762	9.54256e-05	0.000482242	0.390322
ZKSCAN1	0.85031	6.82513	4.42364	2.14507e-05	0.000126455	1.81564
INO80E	0.850216	6.29066	4.50688	1.53707e-05	9.35779e-05	2.13535
PP12719	0.850081	4.01998	4.86189	3.5533e-06	2.46466e-05	3.54535
SMG5	0.849977	6.73113	5.30411	5.23165e-07	4.24802e-06	5.39989
DPH7	0.849359	5.916	7.18526	6.12311e-11	1.0253e-09	14.2553
MIEN1	0.848394	9.90375	2.14976	0.0335773	0.0807543	-5.00344
SLC50A1	0.847715	5.44281	5.64559	1.1186e-07	1.03851e-06	6.89981
DHCR7	0.847661	5.86513	2.73117	0.00726136	0.022323	-3.64779
PP14571	0.847367	3.58726	2.96329	0.00367006	0.012382	-3.02666
CXXC1	0.847303	6.68865	6.38172	3.41353e-09	4.21785e-08	10.3085
STK32B	0.847223	3.70394	2.32674	0.0216529	0.0563764	-4.6219
RBM4	0.845871	5.66431	3.05913	0.00273734	0.00960252	-2.75743
USP37	0.845869	5.7658	6.13929	1.10207e-08	1.23768e-07	9.16153
MOV10	0.845815	4.24637	5.8232	4.91472e-08	4.94663e-07	7.70141
ABAT	0.84531	6.23736	2.74425	0.00699471	0.021617	-3.61396
SH2D3A	0.845142	3.8458	5.89316	3.54204e-08	3.64757e-07	8.02098
GRAMD1A	0.844658	4.7948	5.78698	5.81843e-08	5.76545e-07	7.53679
SPC25	0.844634	3.61163	3.63073	0.00041645	0.00180309	-1.00367
ZNF184	0.844267	6.9188	4.7828	4.95328e-06	3.32745e-05	3.22489
POGZ	0.84422	6.72858	6.16813	9.59678e-09	1.09276e-07	9.29682
DDX27	0.844152	8.52465	6.06596	1.56435e-08	1.71634e-07	8.81912
ZNF793	0.843952	5.24323	4.61891	9.75414e-06	6.1735e-05	2.57233
MAP1S	0.843684	4.88312	3.72737	0.000296328	0.0013268	-0.683098
CNTNAP2	0.843552	4.10531	3.05995	0.00273038	0.00957973	-2.75509
HLA-DRB4	0.843519	4.56839	2.14623	0.0338643	0.0813873	-5.01078
KMO	0.843231	4.13317	2.10056	0.0377687	0.089035	-5.10455
GDPD3	0.843221	3.70366	2.86493	0.00492432	0.0159609	-3.29525
AMMECR1	0.843185	4.18922	6.11824	1.21886e-08	1.35914e-07	9.06305
CDK12	0.843135	5.12656	3.12946	0.00219815	0.00791459	-2.55521
EWSR1	0.842992	6.35093	8.4222	9.19881e-14	2.33242e-12	20.6632
MXD3	0.841353	6.16469	6.02676	1.88489e-08	2.04066e-07	8.63698
OAS2	0.841128	4.12662	3.27759	0.00136903	0.00519337	-2.11661
IL2RB	0.840541	4.29598	2.69764	0.00798707	0.0242192	-3.73382
GPR27	0.840521	4.57743	4.232	4.5507e-05	0.00024798	1.09602
IGSF3	0.840107	3.77402	8.72987	1.75187e-14	5.02761e-13	22.3014
GANAB	0.839631	6.84081	4.88306	3.2493e-06	2.27151e-05	3.63169
KIF22	0.839576	4.38943	6.042	1.75326e-08	1.90928e-07	8.70771
MANF	0.839439	8.44083	4.13332	6.64643e-05	0.000348537	0.734638
STYK1	0.839271	3.91044	2.99847	0.0032981	0.0113004	-2.92869
CXorf40A	0.839021	8.75236	2.98878	0.0033969	0.0115845	-2.95577
AKAP8	0.837391	6.91957	7.56591	8.56865e-12	1.63556e-10	16.1909
USP31	0.837228	4.78858	5.18027	9.03341e-07	6.99363e-06	4.87012
TOB1	0.837079	10.1587	2.78786	0.00616931	0.019412	-3.50019
FLJ22184	0.836987	3.06238	3.04146	0.00289085	0.0100788	-2.80763
PTBP3	0.836947	5.84785	7.39705	2.05897e-11	3.6892e-10	15.3277
LRP5L	0.836461	4.87808	4.61818	9.78367e-06	6.19028e-05	2.56942
ANKRD13A	0.835921	6.82144	4.77653	5.08469e-06	3.4001e-05	3.19964
MAP3K9	0.835769	3.83602	8.15186	3.9048e-13	9.08988e-12	19.236
WWC1	0.83568	4.0427	6.05214	1.67069e-08	1.82421e-07	8.75485
ASNS	0.835179	4.56418	5.40061	3.40115e-07	2.86987e-06	5.81805
GPR137B	0.834809	7.37807	2.69207	0.00811402	0.024539	-3.74805
GMEB2	0.834767	5.85431	5.67682	9.68923e-08	9.1745e-07	7.03973
KDM2B	0.834333	6.97658	4.19062	5.33781e-05	0.000285847	0.943728
EME1	0.832656	4.5813	4.49929	1.58476e-05	9.62521e-05	2.10603
MTF2	0.83238	5.61171	4.40423	2.31714e-05	0.000135622	1.74169
PPIB	0.832322	11.0832	4.00424	0.000108112	0.000540351	0.271667
HERC6	0.831721	3.793	3.70798	0.00031743	0.0014114	-0.747973
CARKD	0.831218	8.34769	4.31508	3.29326e-05	0.000185932	1.40512
PHACTR4	0.831161	5.56705	4.85223	3.70116e-06	2.55337e-05	3.506
FKBPL	0.831076	4.34973	4.7808	4.99494e-06	3.34774e-05	3.21681
CAMK2N1	0.831	4.92288	3.32556	0.0011705	0.00451135	-1.97091
EIF3B	0.830516	6.95367	6.2072	7.95311e-09	9.22543e-08	9.48057
CELSR3	0.830437	3.36881	3.10179	0.00239733	0.00854899	-2.63525
ADPRHL2	0.830424	8.69745	4.30491	3.42694e-05	0.000192639	1.36707
MUS81	0.830319	7.64555	5.47118	2.47571e-07	2.15017e-06	6.12673
PAK4	0.82943	4.95306	7.16578	6.76488e-11	1.11812e-09	14.1573
CCS	0.828977	6.6401	3.82585	0.000208188	0.000965537	-0.34961
TOP1MT	0.828853	4.30896	6.4838	2.07118e-09	2.66376e-08	10.798
HIST1H3E	0.828534	4.02096	5.22648	7.3741e-07	5.80565e-06	5.06689
RUVBL2	0.82815	7.16232	5.68461	9.34737e-08	8.88263e-07	7.07473
LTBP1	0.828068	6.56302	3.17036	0.00193175	0.00706101	-2.43582
UPF1	0.827907	6.45893	5.89877	3.44992e-08	3.56347e-07	8.0467
ALMS1	0.827695	7.2212	6.04659	1.71537e-08	1.86901e-07	8.72906
RHOD	0.827641	6.29229	3.46851	0.000727041	0.00296704	-1.52646
ABCA3	0.827358	6.2877	2.75027	0.00687518	0.021299	-3.59836
LRRC69	0.827283	4.75511	3.88145	0.000170096	0.000806232	-0.158314
ZNF260	0.826611	7.1666	4.43124	2.08111e-05	0.000122932	1.84466
TIGD5	0.826341	7.03481	4.84049	3.88881e-06	2.67472e-05	3.45827
MFSD6	0.825967	5.20478	3.71672	0.000307745	0.00137341	-0.718756
ATP6V0E2	0.825738	8.20578	3.02346	0.00305536	0.0105838	-2.8585
LOC644656	0.824924	4.25889	5.04071	1.65687e-06	1.22085e-05	4.28269
PHLDA2	0.824671	4.32011	5.69866	8.76094e-08	8.3652e-07	7.13785
ZBTB8A	0.824561	6.93603	4.12046	6.97975e-05	0.000364057	0.688012
ZGPAT	0.824526	6.82183	3.89993	0.000158982	0.000759003	-0.0942858
LINC00173	0.824514	3.82222	3.39511	0.000930053	0.00368956	-1.75659
RAP1GAP	0.823636	4.35146	5.02668	1.76014e-06	1.29229e-05	4.2242
PBX1	0.823505	7.88293	2.77719	0.00636257	0.019919	-3.52817
H2AFY2	0.823343	7.16718	3.72995	0.000293621	0.00131583	-0.67444
SLC27A4	0.823108	4.89261	4.7105	6.69132e-06	4.37297e-05	2.93506
NDC1	0.822797	5.24434	4.45787	1.87119e-05	0.000111595	1.94662
ERBB4	0.822066	4.8267	2.70482	0.00782644	0.023785	-3.71549
RPN2	0.822007	10.9667	4.23168	4.55626e-05	0.000248216	1.09485
DNA2	0.821681	4.25434	4.53071	1.39618e-05	8.57919e-05	2.22766
LOC494150	0.821352	3.79501	5.60105	1.37191e-07	1.24598e-06	6.70106
FUS	0.821263	5.30668	9.18333	1.48926e-15	4.90711e-14	24.7384
OPN3	0.82094	6.46991	2.83642	0.00535529	0.0171701	-3.37164
SPA17	0.820912	4.87615	3.18656	0.00183479	0.00674515	-2.38817
BRD1	0.820247	7.3969	4.34788	2.89518e-05	0.000165201	1.5284
DHX33	0.819147	5.69402	5.66156	1.03943e-07	9.75183e-07	6.97131
CCDC78	0.81879	3.72096	2.86745	0.00488772	0.0158524	-3.28846
LOC100131564	0.818609	5.99739	7.07287	1.08673e-10	1.74542e-09	13.6912
ZNF124	0.817876	4.18337	5.36285	4.02741e-07	3.3486e-06	5.65388
AUTS2	0.817442	5.29438	5.89977	3.43384e-08	3.55094e-07	8.05126
HMGA1	0.816867	4.86061	5.36517	3.98599e-07	3.31955e-06	5.66392
ZNF26	0.81659	4.22716	4.82094	4.22193e-06	2.88812e-05	3.37897
SFXN2	0.816476	4.96389	3.94565	0.000134369	0.000654635	0.0652171
BEND3	0.816402	4.88108	5.18878	8.70251e-07	6.75522e-06	4.90629
MFSD5	0.815546	5.83399	2.79595	0.00602632	0.0190265	-3.47891
FAM83B	0.815212	3.07694	3.87016	0.000177254	0.000833594	-0.197357
ELF4	0.815203	5.00496	3.81195	0.000218911	0.00100954	-0.397106
MMP10	0.814781	3.39648	2.17836	0.0313304	0.0763719	-4.94366
ZNF513	0.814377	4.79558	5.24441	6.81388e-07	5.39573e-06	5.14351
PSME4	0.813386	6.66188	4.47444	1.75108e-05	0.000105014	2.01025
FAP	0.813046	5.76288	2.54529	0.0121837	0.0347558	-4.11286
PNISR	0.812868	7.71139	4.09907	7.56975e-05	0.000391537	0.610719
FBXW9	0.81278	5.83944	4.89212	3.12693e-06	2.19497e-05	3.66876
PIGM	0.812634	4.58779	5.25937	6.37837e-07	5.0764e-06	5.20758
HIST1H2AM	0.812574	4.00904	2.84069	0.00528856	0.0169801	-3.36023
LOC101928245	0.812411	3.09621	2.38617	0.0185853	0.049556	-4.48756
FCGR1B	0.812356	4.37948	2.64723	0.00920274	0.0272868	-3.86143
PRKD2	0.811476	6.45573	6.06943	1.53864e-08	1.69358e-07	8.83531
PPFIBP2	0.811292	6.48371	3.16524	0.00196334	0.00715731	-2.45083
CEP170B	0.811142	6.93228	5.71023	8.30531e-08	7.96734e-07	7.18989
EPHX4	0.810943	3.03757	2.43179	0.0164987	0.0448156	-4.38237
TRIM14	0.810215	4.99693	7.05334	1.20025e-10	1.91125e-09	13.5935
WDYHV1	0.809242	6.85883	3.19842	0.00176668	0.0065217	-2.35315
ABCG1	0.808654	5.60171	3.18579	0.00183925	0.00675788	-2.39042
PP7080	0.808648	4.25034	3.72259	0.000301406	0.00134659	-0.699126
KLHL42	0.808454	6.81264	5.51997	1.98502e-07	1.75605e-06	6.34156
STEAP3	0.808452	4.80231	3.32127	0.00118711	0.0045685	-1.98403
P4HB	0.807956	8.26052	3.05995	0.00273038	0.00957973	-2.75509
TCEAL4	0.806766	10.6962	2.95769	0.00373265	0.0125621	-3.04215
RAF1	0.806627	7.13716	5.82234	4.93453e-08	4.96413e-07	7.69749
SLC9A7	0.806554	3.62986	6.37835	3.47014e-09	4.2749e-08	10.2924
PMS2L2	0.805867	3.30894	4.04253	9.36827e-05	0.000474489	0.407852
FAM102A	0.805753	4.69861	6.54389	1.54087e-09	2.025e-08	11.0879
ADCK5	0.805751	4.81539	4.98335	2.12002e-06	1.5307e-05	4.04428
TBC1D30	0.805687	3.43684	4.60249	1.0431e-05	6.56936e-05	2.50781
TNFRSF10A	0.805191	4.00132	5.61374	1.29453e-07	1.1857e-06	6.75758
CDCA7L	0.804691	7.96631	2.58215	0.0110182	0.031871	-4.02297
SDCCAG3	0.804519	4.73465	8.55738	4.44604e-14	1.20337e-12	21.3813
SLC2A6	0.804387	4.20739	2.95642	0.00374707	0.0126044	-3.04568
PRRC2C	0.804083	8.46413	4.37826	2.56824e-05	0.000148324	1.64313
DPP7	0.803727	5.21755	5.99456	2.19577e-08	2.35235e-07	8.48785
GRAMD3	0.803497	5.54593	3.08943	0.00249155	0.00883267	-2.67079
FZD2	0.80316	5.15767	5.30608	5.18612e-07	4.21774e-06	5.40838
PLAU	0.803049	5.08523	2.87162	0.00482785	0.015683	-3.27722
SPATA17	0.803039	3.26357	3.14109	0.00211909	0.00766092	-2.52138
KCNK5	0.802516	4.58322	2.49	0.0141402	0.0394354	-4.24554
NPM3	0.802087	5.03887	3.28997	0.00131496	0.00500589	-2.07916
CNNM3	0.801691	4.66799	4.80276	4.55646e-06	3.08723e-05	3.30541
MCM10	0.801354	3.66524	3.44497	0.000787106	0.00317919	-1.60071
RIBC2	0.800979	3.60338	4.17509	5.66585e-05	0.000301756	0.886829
PLCB4	0.800888	5.22744	2.12648	0.0355077	0.0845819	-5.05156
POLG2	0.800223	5.57713	4.6768	7.69077e-06	4.96588e-05	2.80101
ZDHHC9	0.799819	5.25474	3.66931	0.000363811	0.00159886	-0.87648
FRK	0.799752	4.2107	3.52698	0.000595952	0.00248834	-1.34024
GAS2L3	0.798607	5.58716	3.22755	0.00160925	0.00599364	-2.26666
CRIPAK	0.798139	5.05455	4.45048	1.92735e-05	0.00011481	1.91826
DNAJC5	0.798046	5.28754	4.73156	6.13165e-06	4.02779e-05	3.0192
CADPS2	0.797597	6.63352	2.35202	0.0202975	0.0534128	-4.56514
GABPB1-AS1	0.797138	4.10188	4.28852	3.65349e-05	0.000203921	1.30585
ZNF8	0.797063	5.61677	4.58968	1.09904e-05	6.88357e-05	2.45759
ANKRD36	0.796772	5.93918	4.48206	1.69836e-05	0.000102382	2.03959
BORA	0.79649	5.65441	3.82901	0.00020582	0.000955203	-0.338787
APOL1	0.796241	5.95982	2.57688	0.0111785	0.0322551	-4.03589
ESCO1	0.79572	6.28512	5.18074	9.01464e-07	6.98174e-06	4.87214
CCDC125	0.795516	4.59517	3.75697	0.000266673	0.00120749	-0.583583
NLK	0.795313	6.00762	4.69929	7.00886e-06	4.56446e-05	2.89041
SNRNP25	0.795255	8.6923	2.99136	0.00337031	0.0115035	-2.94856
ENGASE	0.794889	6.89894	5.97442	2.4154e-08	2.56215e-07	8.39474
VANGL1	0.794416	5.68641	4.99128	2.0492e-06	1.4848e-05	4.07713
ANKRD23	0.794166	4.54653	4.77762	5.06168e-06	3.38758e-05	3.20402
GABBR1	0.794084	4.29893	4.57714	1.15662e-05	7.21106e-05	2.40851
HEATR6	0.79301	6.19189	4.64888	8.62686e-06	5.51289e-05	2.69047
DNALI1	0.792616	4.48228	2.11685	0.0363342	0.0862895	-5.07133
GCNT1	0.792504	4.10774	3.43016	0.000827266	0.0033263	-1.64722
LRP8	0.79233	3.89634	3.05678	0.00275732	0.00965936	-2.76412
BATF	0.792132	6.68691	3.5393	0.000571334	0.00239611	-1.30068
PLIN3	0.791967	8.32109	3.61195	0.000444598	0.00191282	-1.06517
B3GALT6	0.791875	4.86956	6.79726	4.37203e-10	6.34922e-09	12.3237
ST3GAL1	0.791745	6.20318	2.31863	0.0221043	0.0572965	-4.63999
GCNT2	0.791389	4.66468	3.45044	0.000772735	0.0031267	-1.58348
WDR11	0.791272	7.55115	3.95111	0.000131688	0.000642642	0.0843454
DUSP2	0.791188	4.08257	2.32401	0.0218039	0.0566901	-4.62799
PADI2	0.791085	3.70121	3.60661	0.000452922	0.00194495	-1.08261
PNKP	0.790422	6.7266	2.90568	0.00436338	0.0143727	-3.18493
ELP2	0.790243	5.7678	2.9711	0.00358428	0.0121426	-3.005
MCM4	0.790119	4.08687	6.32639	4.46869e-09	5.39141e-08	10.0447
XPO5	0.790105	4.85001	4.37013	2.652e-05	0.000152645	1.61239
CABYR	0.789984	3.98536	4.3949	2.40445e-05	0.000140131	1.70625
CCNB2	0.78986	3.9272	6.99469	1.61642e-10	2.52676e-09	13.301
LNX2	0.788681	7.39073	4.39154	2.43668e-05	0.00014146	1.6935
SERPINA1	0.787876	4.81568	2.37583	0.0190898	0.0507293	-4.51116
WDR45B	0.787202	8.68635	3.77154	0.000253131	0.00115178	-0.534369
KIAA0753	0.786628	5.10544	5.24747	6.72244e-07	5.32951e-06	5.15662
DEPDC1	0.78562	3.3401	4.39151	2.43694e-05	0.00014146	1.6934
AJUBA	0.785508	4.1314	4.58618	1.11482e-05	6.97174e-05	2.44388
LSM7	0.785453	8.85847	3.35796	0.00105205	0.00411134	-1.87154
RPS21	0.785074	11.2097	4.3922	2.43032e-05	0.000141276	1.696
KIAA1147	0.784683	6.28074	5.86962	3.95568e-08	4.04503e-07	7.9132
GALNT2	0.784504	6.08348	4.65026	8.57806e-06	5.48342e-05	2.69593
PRR14	0.784417	6.08243	5.9927	2.21526e-08	2.36951e-07	8.47922
FBXL2	0.784409	5.00231	5.36369	4.0124e-07	3.34019e-06	5.65751
ISG20L2	0.784093	5.66704	5.25326	6.55285e-07	5.20716e-06	5.1814
TET3	0.783548	4.41886	9.34804	6.05279e-16	2.13171e-14	25.629
SEMA4D	0.783352	3.89995	4.64812	8.65381e-06	5.52494e-05	2.68747
RAD54L	0.783269	3.64633	3.62688	0.000422069	0.00182395	-1.01627
TEAD4	0.783086	4.53027	2.93868	0.00395279	0.0132117	-3.0946
TTC39A	0.78262	3.69042	5.24137	6.90558e-07	5.45778e-06	5.13055
CHST11	0.782425	4.45321	3.42678	0.000836692	0.00336023	-1.65781
BDP1	0.78237	6.12857	3.90116	0.000158263	0.000756278	-0.0899931
PPAPDC2	0.7819	5.39546	2.82781	0.005492	0.0175589	-3.39457
MAZ	0.781787	5.00451	7.23465	4.75365e-11	8.05876e-10	14.5043
NOTCH2NL	0.779542	11.6844	3.97205	0.000121866	0.000601161	0.157926
DYNLL1-AS1	0.779468	3.87047	4.16096	5.98084e-05	0.000317293	0.835228
DNAL4	0.779157	5.12515	4.91929	2.78652e-06	1.97157e-05	3.78008
AEN	0.778279	4.7958	5.11316	1.21071e-06	9.13476e-06	4.58639
FARSA	0.777376	5.99278	4.52876	1.40721e-05	8.64178e-05	2.2201
SGK223	0.777222	8.77886	3.02921	0.00300187	0.010425	-2.84227
UBP1	0.777039	8.79792	4.94773	2.46868e-06	1.76438e-05	3.8971
COL8A2	0.776955	4.27395	3.44107	0.000797496	0.00321671	-1.61297
GDI1	0.776843	8.4461	3.67136	0.000361209	0.00158845	-0.86972
URB2	0.776109	4.95498	3.95082	0.000131831	0.000642883	0.0833117
INPPL1	0.775467	6.00994	5.58272	1.49181e-07	1.3465e-06	6.61949
AFTPH	0.77533	7.91922	5.15588	1.00502e-06	7.67915e-06	4.76675
ADAM8	0.775272	3.91236	5.48673	2.30771e-07	2.01796e-06	6.19506
GYLTL1B	0.77526	4.78088	2.92959	0.00406221	0.0135134	-3.11957
HLA-A	0.775081	12.2598	3.37469	0.000995354	0.00391747	-1.8199
GON4L	0.774721	5.72291	6.83879	3.54966e-10	5.22541e-09	12.5283
WISP1	0.774637	3.23156	6.03228	1.83609e-08	1.99523e-07	8.66261
ZNF738	0.774613	4.27733	4.74998	5.67981e-06	3.75146e-05	3.09296
WDR6	0.774487	5.61051	8.4494	7.94863e-14	2.03306e-12	20.8074
FAM193A	0.774323	6.24936	5.66395	1.02804e-07	9.66715e-07	6.98204
PSENEN	0.774118	7.35097	2.91609	0.00422981	0.0139846	-3.15653
KIF21A	0.773656	6.35558	3.72482	0.000299027	0.00133771	-0.691651
SLC4A3	0.77359	3.77932	3.16314	0.00197647	0.0071969	-2.45699
FUBP1	0.772933	5.38566	6.24994	6.47176e-09	7.62817e-08	9.68223
SLC45A4	0.772517	5.55499	3.54862	0.000553363	0.00232709	-1.2707
GOLT1A	0.771987	3.21704	3.10433	0.00237837	0.00848731	-2.62793
AQP5	0.771265	3.00765	2.03799	0.0437446	0.100732	-5.23001
ARHGEF5	0.771033	6.60926	4.20631	5.02516e-05	0.00027102	1.00133
FDPS	0.77067	9.38159	3.95831	0.000128229	0.000628009	0.109607
NCEH1	0.770633	5.04942	2.05565	0.0419817	0.0972528	-5.19497
MCM7	0.770598	7.34182	3.74408	0.000279226	0.00125793	-0.627007
RBM6	0.770496	6.28417	4.17464	5.67556e-05	0.000302194	0.885196
TMEM181	0.770461	7.97619	2.71582	0.00758584	0.0231882	-3.6873
POU2F3	0.770351	3.39895	4.44278	1.98748e-05	0.000117843	1.8888
TOP1	0.770107	9.56347	5.77894	6.04012e-08	5.96203e-07	7.50033
NOMO3	0.769667	5.54566	4.31663	3.27327e-05	0.000184907	1.41095
ANAPC2	0.769615	5.7627	4.73351	6.08238e-06	3.998e-05	3.02697
GBP5	0.769433	3.53438	2.33536	0.0211817	0.0553536	-4.60259
TMEM99	0.769337	8.36613	2.44668	0.0158646	0.043416	-4.34767
THBS3	0.769245	6.53911	4.32069	3.22164e-05	0.000182355	1.42616
IQGAP3	0.769241	3.40423	7.88656	1.59402e-12	3.39406e-11	17.8484
NUP85	0.769232	7.49641	4.1114	7.224e-05	0.000375457	0.655245
LOC100289333	0.768702	7.81685	3.95648	0.000129097	0.000631506	0.103201
MIAT	0.768649	3.95534	3.55499	0.000541369	0.00228308	-1.25014
TMEM25	0.768513	4.05833	4.05843	8.82502e-05	0.000449086	0.464676
MRPS34	0.76825	7.81695	3.84285	0.000195759	0.000913064	-0.291364
ACYP1	0.766709	7.51355	3.81264	0.000218367	0.00100749	-0.394755
JPH1	0.76663	3.97592	3.85852	0.000184925	0.000866287	-0.237476
CNOT6	0.76642	6.89201	4.68825	7.33605e-06	4.75785e-05	2.84647
GRAMD2	0.766155	3.89955	2.48798	0.0142166	0.0395983	-4.25033
GOLGA8A	0.765562	7.08172	2.32303	0.0218579	0.056809	-4.63016
SIAH2	0.765335	5.38552	2.10263	0.0375838	0.0886808	-5.10034
LOC100288152	0.764786	4.43392	3.04027	0.00290144	0.0101123	-2.81099
FXYD5	0.764172	5.96912	2.08121	0.0395371	0.0925401	-5.14373
LOC388692	0.763991	3.34542	4.86037	3.57624e-06	2.47806e-05	3.53914
MLST8	0.763884	6.6601	3.71244	0.000312448	0.00139167	-0.733058
NAA60	0.7634	7.25442	3.80825	0.000221852	0.0010215	-0.409725
ZNF766	0.763331	6.61706	5.38965	3.57237e-07	3.00197e-06	5.77034
LOC102724387	0.763095	4.34333	2.43594	0.0163196	0.0444353	-4.37271
TEFM	0.763031	6.9103	3.83383	0.000202264	0.000939978	-0.322298
AUP1	0.763027	9.00427	4.20756	5.00092e-05	0.000269855	1.00594
KCTD15	0.76292	3.73302	7.51572	1.11266e-11	2.09451e-10	15.9336
CHD1L	0.762545	5.6131	5.6425	1.1346e-07	1.05241e-06	6.88598
SSX2IP	0.761923	3.56914	5.78547	5.8594e-08	5.80044e-07	7.52995
TRUB2	0.761835	6.35	4.39537	2.39999e-05	0.000139911	1.70803
OAS1	0.761702	5.20448	2.08323	0.0393497	0.0921357	-5.13967
TRIM25	0.761634	5.6467	6.81106	4.07983e-10	5.96296e-09	12.3916
MDC1	0.761538	5.31942	5.08782	1.35155e-06	1.01153e-05	4.47983
ZNF439	0.761476	4.28515	3.02978	0.00299663	0.0104086	-2.84066
PCP2	0.760959	3.54344	3.195	0.00178603	0.00658483	-2.36324
IRF2BP2	0.760669	8.19384	6.64831	9.19083e-10	1.25879e-08	11.5946
DAZAP1	0.760452	8.7051	7.91083	1.40236e-12	3.02372e-11	17.9748
ODF2	0.760286	3.97225	5.1808	9.01237e-07	6.98174e-06	4.87238
SIPA1L2	0.759421	5.16605	4.14611	6.32995e-05	0.000333658	0.78114
ACIN1	0.759174	6.35615	4.51115	1.51082e-05	9.20896e-05	2.15189
PDGFA	0.759073	5.99058	2.7701	0.00649408	0.0202718	-3.54671
CDCA7	0.758791	4.32353	2.62704	0.00973459	0.0286315	-3.91191
C4orf48	0.757071	7.86895	2.17057	0.0319293	0.0776027	-4.96002
ZNF324	0.75593	4.27941	4.67929	7.61221e-06	4.92603e-05	2.8109
ZDHHC16	0.755523	8.59384	4.2136	4.88592e-05	0.000264276	1.02815
ZFYVE27	0.755355	3.98841	5.89099	3.57843e-08	3.68134e-07	8.01101
TPM4	0.755199	7.22158	5.18012	9.03927e-07	6.99552e-06	4.86949
CD8A	0.754985	4.86646	2.01751	0.0458689	0.104693	-5.27031
HAPLN3	0.75497	3.87518	2.44829	0.0157971	0.0432783	-4.34389
CCDC6	0.754668	7.95047	4.55238	1.27895e-05	7.92065e-05	2.3119
SHQ1	0.754446	7.73941	4.3357	3.03729e-05	0.000172636	1.48254
FAM222B	0.754348	5.58014	3.87633	0.000173305	0.000818598	-0.176019
CHPF	0.754049	5.75576	5.32733	4.71854e-07	3.87598e-06	5.5001
TMEM14A	0.753876	8.98677	2.68958	0.00817117	0.0246824	-3.75438
TSC22D4	0.753563	4.65673	5.6676	1.01095e-07	9.51521e-07	6.99837
TP53RK	0.753127	5.29149	3.34589	0.0010948	0.00425727	-1.90865
GID8	0.752526	7.13199	5.47782	2.40258e-07	2.09287e-06	6.15588
AGPAT5	0.752446	4.73685	4.86998	3.43409e-06	2.38845e-05	3.57829
DHTKD1	0.75243	7.49405	2.71193	0.00767022	0.0233971	-3.69729
SNRNP70	0.75239	4.95524	5.66919	1.00357e-07	9.46314e-07	7.00551
DAP	0.751493	7.14832	3.10123	0.00240152	0.00855799	-2.63686
HMG20B	0.750412	5.32909	5.4948	2.22492e-07	1.94973e-06	6.23059
PPM1G	0.750253	7.57967	3.5269	0.000596121	0.00248834	-1.34051
RNPS1	0.750244	8.60415	6.21234	7.75877e-09	9.02559e-08	9.50477
ECT2	0.749746	4.07074	6.87461	2.96464e-10	4.45393e-09	12.7051
SERINC2	0.749663	3.68254	9.65555	1.12074e-16	4.36811e-15	27.2979
ATP7B	0.749655	3.18507	2.4973	0.0138667	0.0387572	-4.22817
COL5A2	0.749537	9.40295	2.04691	0.0428469	0.0989877	-5.21235
TNFSF4	0.748701	4.11406	2.73733	0.00713463	0.0219929	-3.63187
RTN4RL1	0.74814	4.89492	2.45712	0.0154325	0.0424491	-4.32319
DCAF13	0.747457	5.53503	5.16812	9.52672e-07	7.32841e-06	4.81859
SKAP1	0.747397	3.75886	2.8123	0.00574647	0.0182499	-3.43573
RAB11FIP4	0.747137	3.77523	5.60723	1.3337e-07	1.21451e-06	6.72856
C19orf10	0.746904	7.66197	3.42798	0.000833332	0.00334871	-1.65405
ANKS3	0.746079	4.85213	4.36352	2.7221e-05	0.000156316	1.58742
TRAF5	0.745816	4.87697	4.88905	3.16796e-06	2.22148e-05	3.65617
TMEM205	0.745655	8.04012	2.53557	0.0125093	0.0355161	-4.13639
CD2BP2	0.745626	7.59269	5.42542	3.04268e-07	2.5963e-06	5.92628
SEC24C	0.744745	7.925	4.72109	6.40391e-06	4.19721e-05	2.97734
GTSE1	0.744422	4.72989	4.9463	2.48383e-06	1.77458e-05	3.89119
DIABLO	0.744241	8.34446	4.02814	9.8878e-05	0.000497967	0.356529
TTC13	0.74418	6.19812	3.58342	0.00049083	0.00209411	-1.15813
FSIP1	0.744057	3.21528	2.22968	0.0276253	0.0688428	-4.83457
RAB11FIP1	0.743613	6.92651	2.87188	0.00482422	0.0156772	-3.27654
ILF2	0.743579	8.49821	2.62889	0.00968471	0.0285052	-3.9073
SNRPF	0.743129	7.02741	4.65724	8.3356e-06	5.33676e-05	2.72352
ATG4D	0.742402	5.97011	4.28255	3.73964e-05	0.000207936	1.28357
LOC286052	0.742393	5.10843	2.94239	0.00390893	0.0130951	-3.08439
KIF14	0.742221	3.42553	3.38049	0.000976406	0.00384956	-1.80197
ABCC3	0.741866	4.01692	3.24551	0.00151886	0.00569732	-2.21304
SNHG19	0.741846	8.56235	2.37971	0.0188993	0.0502824	-4.50233
RBBP4	0.741298	6.15529	5.96237	2.55682e-08	2.69678e-07	8.33918
CRTC2	0.741236	4.58138	5.08385	1.37501e-06	1.02797e-05	4.46317
TARBP2	0.741167	5.40668	5.3879	3.60049e-07	3.02311e-06	5.76272
PRELID1	0.74066	8.47864	3.28491	0.00133682	0.00507874	-2.09449
SRRM2	0.740614	6.4039	4.34261	2.95584e-05	0.000168381	1.50855
VARS2	0.740209	8.31155	4.06346	8.65937e-05	0.000441645	0.482705
VPS28	0.740086	9.3422	3.05691	0.00275617	0.00965698	-2.76374
TAPBP	0.74005	4.74287	6.16979	9.52083e-09	1.08472e-07	9.30459
NAA40	0.739576	5.04153	6.09522	1.36061e-08	1.50981e-07	8.9555
AKT1	0.739218	6.58355	2.82725	0.00550091	0.0175783	-3.39604
ZC3H8	0.739204	5.33342	4.40926	2.27132e-05	0.000133283	1.76083
KIF26B	0.738996	3.38943	6.82872	3.73378e-10	5.48461e-09	12.4786
NSUN2	0.738956	7.67422	4.05915	8.80112e-05	0.000447982	0.467256
TTC19	0.738939	7.25481	2.73015	0.00728239	0.0223799	-3.65041
DDX58	0.738532	5.19738	3.01628	0.00312337	0.0107884	-2.87872
CCDC114	0.738522	3.29178	2.73582	0.00716557	0.0220684	-3.63579
M6PR	0.738518	7.02074	2.72052	0.00748508	0.0229281	-3.67522
NKAIN1	0.738322	3.43414	2.79046	0.00612289	0.0192956	-3.49334
EFNA3	0.738202	5.38348	4.13407	6.62725e-05	0.000347761	0.737393
NMU	0.738045	3.55115	2.79998	0.00595608	0.0188367	-3.46827
FNBP1	0.737198	6.3839	4.48128	1.70366e-05	0.00010256	2.0366
SLC37A1	0.737165	4.07512	6.7901	4.53179e-10	6.55332e-09	12.2885
SUSD3	0.736378	3.23605	3.51404	0.000622893	0.00258742	-1.38169
GADD45G	0.735506	5.58984	3.17483	0.0019045	0.0069701	-2.42268
GNB2	0.735387	9.2045	3.52054	0.000609228	0.00253684	-1.3609
LEPRE1	0.734857	7.09277	4.15361	6.15125e-05	0.000325321	0.808441
ANKRD22	0.73428	4.63686	3.08237	0.00254691	0.00900552	-2.69104
FAM111A	0.734088	4.73028	5.82648	4.83999e-08	4.87622e-07	7.71636
CHDH	0.732857	4.40046	5.24186	6.89076e-07	5.44817e-06	5.13263
TRMU	0.732856	4.93776	5.86008	4.13649e-08	4.2257e-07	7.86959
TUG1	0.732789	6.60833	5.87776	3.80759e-08	3.90531e-07	7.95043
ASAP1-IT1	0.732674	4.27518	4.20413	5.06749e-05	0.000272943	0.993323
ZNF195	0.732218	6.44834	3.46578	0.000733776	0.00299094	-1.53509
FBXO16	0.731815	4.05173	2.93483	0.00399871	0.0133347	-3.10517
DEDD2	0.731712	7.60696	4.21324	4.89276e-05	0.000264576	1.02682
PPIL1	0.730807	6.16373	2.64847	0.00917094	0.0272241	-3.85832
TMEM8A	0.730709	6.35292	4.27219	3.89353e-05	0.000215498	1.24502
CSNK1A1	0.73044	6.41374	5.82348	4.90838e-08	4.94268e-07	7.70267
LOC155060	0.730431	4.98763	3.8711	0.000176643	0.000831296	-0.194089
ZNF823	0.730048	5.90983	3.12853	0.00220456	0.00793485	-2.5579
CPLX1	0.729586	3.36521	2.46483	0.0151204	0.0417931	-4.30507
SCAMP3	0.729352	8.18625	2.66412	0.00877799	0.0262289	-3.81891
ST6GALNAC5	0.729236	3.12938	2.94492	0.0038792	0.0130061	-3.07741
ZNF211	0.729004	5.22265	3.58147	0.00049414	0.00210648	-1.16445
SF3B4	0.728197	6.92014	4.632	9.24543e-06	5.86787e-05	2.62385
SLC39A10	0.728154	7.62725	2.56346	0.0115962	0.0332699	-4.0687
ZNF431	0.72765	4.09408	4.94072	2.5436e-06	1.81475e-05	3.86821
BCAS4	0.727427	4.18075	4.24534	4.32157e-05	0.000236755	1.14536
SMPD2	0.727329	5.66915	5.17322	9.31662e-07	7.17488e-06	4.8402
PHKA1	0.727219	3.89648	3.98226	0.00011733	0.000581189	0.193942
TFCP2L1	0.72694	3.8916	2.68418	0.00829657	0.0249985	-3.76811
NME7	0.726328	6.96037	2.49918	0.0137972	0.0385997	-4.2237
PGF	0.7259	7.87439	5.32833	4.69763e-07	3.86191e-06	5.50441
GPR39	0.72507	3.8927	4.36028	2.75714e-05	0.000158143	1.57517
SOCS7	0.7243	5.99986	4.14357	6.39159e-05	0.000336294	0.771902
SGPL1	0.724255	5.66605	4.39404	2.41268e-05	0.00014049	1.70298
TBCD	0.724125	4.91532	6.47865	2.12419e-09	2.71827e-08	10.7732
UBE2I	0.723631	5.55199	7.38604	2.17953e-11	3.89839e-10	15.2716
NARFL	0.723363	6.98308	4.93252	2.63403e-06	1.87535e-05	3.83445
SPPL3	0.723313	5.12779	6.023	1.91879e-08	2.07517e-07	8.61957
CSNK1G2	0.723247	6.94414	5.45	2.72397e-07	2.3528e-06	6.03382
PAXBP1	0.722687	5.29471	4.08305	8.04256e-05	0.000413485	0.553033
B4GALT3	0.722403	4.4946	6.21183	7.7778e-09	9.04257e-08	9.50238
MFSD12	0.722142	4.6816	4.49551	1.60905e-05	9.76693e-05	2.09143
GRB7	0.72112	4.98309	2.31414	0.0223578	0.0577851	-4.64998
PTMA	0.721094	11.82	8.67416	2.36766e-14	6.65482e-13	22.0038
HYAL2	0.720895	7.25028	3.20306	0.0017407	0.00643159	-2.33943
CUTA	0.720845	10.9428	4.03361	9.68714e-05	0.000488583	0.376022
PRAF2	0.720675	4.78359	3.16673	0.00195409	0.00713372	-2.44645
PGM2L1	0.72059	4.3687	4.5488	1.29762e-05	8.01929e-05	2.29798
PRR24	0.720471	6.26396	2.97566	0.00353508	0.0119929	-2.99233
NFE2L3	0.719965	3.7718	2.65363	0.00903967	0.0268773	-3.84535
DDOST	0.719702	8.9836	3.3639	0.00103159	0.00403989	-1.85324
TTC9	0.719083	3.90391	4.69369	7.17289e-06	4.66238e-05	2.86813
PAWR	0.719007	4.77271	4.88485	3.22475e-06	2.25666e-05	3.63902
NHP2	0.718943	10.3615	2.83803	0.00533002	0.0170998	-3.36734
SPATC1L	0.718713	4.27264	2.68726	0.00822483	0.0248188	-3.76028
MNX1	0.71867	3.51999	3.19211	0.00180262	0.0066388	-2.3718
PIDD1	0.718325	4.89345	4.89816	3.04796e-06	2.14542e-05	3.69346
LYPLA1	0.718118	8.93396	3.02768	0.00301597	0.0104651	-2.84658
RAB31	0.717455	8.69077	2.19442	0.0301274	0.073979	-4.90979
KLC2	0.717346	5.21468	4.07685	8.23307e-05	0.00042213	0.530748
THAP9-AS1	0.71634	7.88892	2.87244	0.00481615	0.01566	-3.27501
LOC100310756	0.716244	5.86663	5.35514	4.16844e-07	3.46022e-06	5.62046
ZIC2	0.716134	3.03136	2.19357	0.0301902	0.0740977	-4.91159
SEZ6L2	0.715897	4.42465	3.75539	0.000268185	0.00121273	-0.588922
CIC	0.71586	5.0903	5.38002	3.72987e-07	3.12022e-06	5.72843
LIPH	0.715655	3.75423	3.88075	0.000170532	0.000808111	-0.160739
CBFA2T2	0.715477	4.24483	11.3037	1.25496e-20	8.82442e-19	36.3094
LIG3	0.715253	3.94455	5.47613	2.42098e-07	2.1071e-06	6.14847
GAPDH	0.715171	12.1071	2.97661	0.00352488	0.0119713	-2.98968
XIST	0.715044	8.10023	2.7909	0.00611511	0.01928	-3.49219
ARHGEF18	0.714926	8.37876	3.93571	0.000139391	0.000675723	0.0304048
PARP14	0.714792	4.26346	5.05237	1.57558e-06	1.16262e-05	4.33138
ARHGEF19	0.714491	4.61831	4.50101	1.57382e-05	9.57015e-05	2.11267
SLC44A4	0.713719	3.21198	3.75997	0.000263834	0.00119596	-0.57348
SCAF4	0.713627	4.61853	5.72644	7.70524e-08	7.44052e-07	7.26298
EVPL	0.712846	3.31392	3.3174	0.00120226	0.00462159	-1.99583
CBS	0.712475	3.65725	3.14955	0.00206328	0.00747767	-2.49672
KIAA0485	0.712358	5.80453	3.33008	0.00115329	0.00445507	-1.95712
TEAD3	0.711488	5.35492	4.9515	2.4293e-06	1.74117e-05	3.91264
LOC101928152	0.711209	3.25905	2.33573	0.021162	0.0553236	-4.60178
MYD88	0.710536	8.31087	3.12031	0.0022622	0.00811663	-2.58172
CYP2J2	0.709511	3.93597	2.4287	0.0166334	0.0451217	-4.38956
LOC100133130	0.709165	5.37722	4.62699	9.43688e-06	5.98566e-05	2.60413
AKAP10	0.708366	4.8752	5.17995	9.04609e-07	6.99673e-06	4.86876
PARP1	0.708264	7.38402	3.35088	0.00107693	0.00419495	-1.89332
TLDC1	0.707862	3.9522	5.15672	1.00135e-06	7.65971e-06	4.7703
TYK2	0.707766	7.79056	3.63037	0.000416971	0.00180496	-1.00484
TBC1D10B	0.707461	6.06626	3.8003	0.000228298	0.00104764	-0.436804
RBM8A	0.707337	6.29831	5.51056	2.07161e-07	1.82949e-06	6.30002
HSPH1	0.706684	6.58218	3.82453	0.000209182	0.000969488	-0.354116
CAMSAP3	0.706081	3.45131	4.92098	2.76653e-06	1.96082e-05	3.78704
LOC100288860	0.706047	3.41917	3.5418	0.000566474	0.00237768	-1.29267
MYOF	0.705904	6.61948	2.9549	0.00376423	0.01266	-3.04987
ZFP62	0.705548	7.91244	3.41006	0.000884834	0.00353347	-1.71006
TARDBP	0.704671	8.60678	3.6649	0.000369494	0.00161917	-0.891076
NAIP	0.70462	4.47939	3.40464	0.000900986	0.00358681	-1.72695
SSR4	0.704305	11.1778	3.47865	0.000702525	0.00288135	-1.49436
KCNJ3	0.702562	3.04856	1.98225	0.0497318	0.112084	-5.33879
CEP85	0.702123	4.23735	5.44209	2.82279e-07	2.42688e-06	5.99919
SRPK1	0.701974	5.97043	6.41964	2.83641e-09	3.5476e-08	10.4899
ITGB2-AS1	0.701938	4.68951	2.42678	0.0167174	0.0453315	-4.39402
RAB24	0.701614	7.84973	3.92903	0.000142862	0.00069026	0.00707528
COL3A1	0.701458	11.136	2.01977	0.0456301	0.104322	-5.26588
TMEM106C	0.701175	6.67072	5.4456	2.77854e-07	2.39488e-06	6.01454
RNF24	0.701053	4.46593	4.15865	6.03395e-05	0.000319613	0.826798
CHFR	0.70004	6.03754	4.45343	1.90475e-05	0.000113531	1.92957
KIAA0100	0.699677	6.83422	3.6102	0.000447305	0.00192325	-1.07088
LOC93622	0.699663	6.60641	3.15205	0.00204702	0.00742662	-2.48941
SYNGR2	0.699637	5.12472	4.67873	7.62963e-06	4.93418e-05	2.8087
SLC2A1	0.699356	3.9666	3.8844	0.000168273	0.000798145	-0.148105
CLIC3	0.699311	4.13991	2.12138	0.0359429	0.0854496	-5.06203
ITPR3	0.699121	4.22627	5.9059	3.33631e-08	3.46009e-07	8.07938
CRNKL1	0.699098	6.36532	2.19515	0.0300734	0.0738641	-4.90823
OGT	0.698804	6.10253	4.4823	1.69675e-05	0.000102325	2.0405
RABIF	0.698608	5.61379	4.41784	2.19511e-05	0.000129218	1.79354
ARPC1B	0.69809	8.5272	2.53695	0.0124624	0.0354076	-4.13304
NAGK	0.697108	7.82901	2.4306	0.0165503	0.0449321	-4.38514
CCT6A	0.695648	9.20333	4.34736	2.9012e-05	0.000165453	1.52641
C17orf75	0.695384	4.55709	3.55229	0.00054642	0.00230201	-1.25886
PODXL	0.695378	7.71411	2.59858	0.0105318	0.0306547	-3.98253
FAF2	0.695275	7.30275	4.96418	2.30125e-06	1.65454e-05	3.96498
SDR42E1	0.694997	3.56046	4.1276	6.7926e-05	0.000355655	0.713909
SLC35A2	0.694838	4.35418	8.17144	3.51802e-13	8.2458e-12	19.3389
PERP	0.694808	5.15568	3.8054	0.000224137	0.00103086	-0.419414
WDR5	0.694536	5.57679	4.5842	1.12387e-05	7.02614e-05	2.43612
PTPRF	0.694085	7.50856	2.95784	0.00373095	0.0125584	-3.04173
GSS	0.694012	8.11735	4.88338	3.24489e-06	2.2692e-05	3.633
CECR5	0.693853	6.86344	3.96344	0.000125816	0.000617966	0.12764
NELFB	0.693619	7.27096	4.31333	3.31591e-05	0.000187018	1.39857
CAPN12	0.693479	3.71825	2.84695	0.00519227	0.0167235	-3.34351
EIF4G1	0.693444	7.58895	3.87084	0.000176814	0.00083191	-0.195006
MCM3	0.693282	6.14682	3.4557	0.000759178	0.00308342	-1.56693
PLOD3	0.693281	7.74733	2.9053	0.00436836	0.0143822	-3.18597
NECAB3	0.693152	6.39328	3.3518	0.00107368	0.00418522	-1.89051
SLC7A1	0.692997	3.78657	7.91115	1.39994e-12	3.02169e-11	17.9765
RASGEF1A	0.69284	4.04752	3.22554	0.00161969	0.00602473	-2.27266
ORAI2	0.692524	4.42152	6.14275	1.08395e-08	1.22069e-07	9.17774
C10orf82	0.692489	3.03821	2.32933	0.0215101	0.0560616	-4.61609
RPP40	0.691987	5.44188	2.67732	0.00845836	0.0254223	-3.78551
DPH2	0.691757	6.49823	4.00395	0.00010823	0.000540807	0.270632
CHMP1A	0.691465	8.33102	5.06718	1.47789e-06	1.09528e-05	4.39333
GLI3	0.69135	5.44781	3.60342	0.000457966	0.00196496	-1.09302
EOMES	0.691207	3.68453	2.28237	0.0242254	0.0617233	-4.72015
ZNF75A	0.691168	5.81765	4.60337	1.03939e-05	6.55003e-05	2.51124
PSTPIP2	0.690901	4.35644	2.87075	0.0048404	0.0157188	-3.27959
SWSAP1	0.69087	4.91065	5.43212	2.95226e-07	2.5297e-06	5.9556
ATG4B	0.690838	6.22334	6.21138	7.79465e-09	9.05702e-08	9.50026
TM4SF1	0.690813	6.13731	2.19563	0.0300382	0.0737953	-4.90722
AGBL2	0.690608	3.35541	3.56816	0.000517375	0.00219365	-1.20759
HLA-J	0.690453	7.75583	2.42631	0.0167378	0.0453541	-4.3951
GTF3C2	0.690274	6.24471	5.47552	2.42764e-07	2.11111e-06	6.14579
C3orf80	0.689857	3.64306	3.43561	0.00081226	0.0032711	-1.63012
GMNN	0.68981	7.66296	2.40561	0.0176692	0.0474597	-4.44296
PTPRCAP	0.689766	4.77427	2.11057	0.0368812	0.0873329	-5.08416
USP10	0.689506	5.73509	4.52292	1.4408e-05	8.82948e-05	2.19745
DNAJA3	0.689313	7.63926	3.40807	0.000890723	0.00355421	-1.71626
FOXD1	0.689208	2.95847	2.02507	0.045075	0.103215	-5.25548
AGAP9	0.688795	5.3904	3.7734	0.000251447	0.00114489	-0.528066
PPDPF	0.688469	5.55115	3.98115	0.000117815	0.000583427	0.190028
LOC102724362	0.688427	5.55637	3.57926	0.000497937	0.00211957	-1.17163
DNAJC22	0.688325	4.64156	4.12679	6.81353e-05	0.000356295	0.710978
ZCCHC7	0.687681	5.92015	5.41694	3.16077e-07	2.68698e-06	5.88928
RCC1	0.687443	4.9944	5.16375	9.71066e-07	7.45589e-06	4.80006
TMED3	0.687257	4.20067	8.46232	7.41563e-14	1.91348e-12	20.876
UBL4A	0.686947	5.61946	4.23202	4.55029e-05	0.00024798	1.0961
MVP	0.686604	7.57484	3.1205	0.0022609	0.0081134	-2.5812
HMGXB4	0.686506	7.2576	4.44757	1.94988e-05	0.00011595	1.90711
ZNF304	0.686356	5.36958	2.93366	0.00401286	0.0133688	-3.1084
PMF1	0.686083	7.85049	3.72892	0.000294705	0.00131982	-0.677916
SPECC1L	0.685333	7.53202	4.47321	1.75972e-05	0.000105408	2.00553
CDK20	0.685298	4.3143	4.70951	6.71877e-06	4.38951e-05	2.93111
NEFH	0.684827	3.4926	2.07779	0.0398575	0.0931222	-5.15063
SF1	0.684349	5.62455	6.12559	1.17679e-08	1.31609e-07	9.09739
H2AFZ	0.684243	10.9291	2.7068	0.00778269	0.0236626	-3.71043
WEE1	0.683713	5.12933	4.88413	3.23454e-06	2.26274e-05	3.63609
CD300LF	0.683588	3.41165	2.99166	0.00336723	0.0114949	-2.94772
FBXO15	0.683151	3.41853	2.64106	0.00936243	0.0276732	-3.87689
SMAD1	0.682674	7.41814	3.93851	0.000137959	0.000670049	0.0402051
RBBP8	0.682542	7.95006	2.20141	0.0296165	0.0729208	-4.89497
CCR7	0.682505	3.92966	2.18762	0.0306321	0.0749575	-4.92417
PRKCI	0.682021	5.65676	6.14136	1.09117e-08	1.22679e-07	9.17125
ARF3	0.681476	7.24124	3.08727	0.00250835	0.00888758	-2.67698
WFDC2	0.681142	3.43934	3.33065	0.00115112	0.0044484	-1.95537
SULT2B1	0.681133	4.65071	2.84526	0.00521803	0.0167932	-3.34801
KCTD1	0.680875	4.20939	4.80696	4.47699e-06	3.03439e-05	3.32238
OSBPL3	0.680855	5.23849	2.37655	0.0190542	0.0506478	-4.50952
TRAPPC6A	0.680844	6.30701	2.89223	0.00454167	0.0148953	-3.22149
RPS16P5	0.680405	7.00697	2.20423	0.0294123	0.0725278	-4.88898
PPP4R1	0.679662	9.33335	4.26553	3.99584e-05	0.000220266	1.22023
MIS18A	0.679585	4.62117	3.71457	0.000310098	0.0013824	-0.725937
DENND4B	0.678774	6.31333	2.86303	0.00495201	0.0160456	-3.30036
MRGBP	0.678696	5.70174	4.39185	2.43368e-05	0.000141391	1.69468
ZNF574	0.678215	4.54676	4.43287	2.06764e-05	0.000122263	1.85089
S100A11	0.678175	10.2132	2.21476	0.0286613	0.071018	-4.86654
VASP	0.677848	8.34544	3.05038	0.00281239	0.00982873	-2.78232
ZNF296	0.677758	3.93351	2.83509	0.0053761	0.0172261	-3.37517
DDX11	0.677562	3.99882	5.65521	1.07021e-07	9.99028e-07	6.94288
TMEM65	0.67744	5.61665	3.40362	0.000904069	0.00359554	-1.73014
NLRP2	0.677191	3.39015	2.49188	0.0140696	0.0392704	-4.24108
COQ4	0.677179	6.15005	4.01246	0.000104847	0.000525958	0.30081
HGS	0.676546	5.28529	4.78519	4.90405e-06	3.29762e-05	3.23452
BAZ1A	0.676501	7.78967	3.61459	0.000440532	0.00189692	-1.05653
ZBTB9	0.676198	4.32777	5.59671	1.39943e-07	1.26929e-06	6.68172
KLHDC9	0.675971	6.56616	2.07132	0.0404679	0.0941349	-5.16362
FAM109B	0.675696	5.06625	3.89452	0.000162162	0.000772384	-0.113057
ASPSCR1	0.675276	5.38201	3.35309	0.0010691	0.00417002	-1.88652
LAD1	0.674659	3.88895	3.65361	0.000384419	0.00167718	-0.928357
CD82	0.674567	4.86269	2.99738	0.0033091	0.0113263	-2.93175
ADNP2	0.674487	6.93268	5.16165	9.8e-07	7.51321e-06	4.79119
CBR4	0.674299	6.18934	4.06437	8.62979e-05	0.000440451	0.485961
MROH6	0.674192	5.83366	3.37521	0.000993641	0.00391156	-1.81829
PIM3	0.674038	9.65892	3.91572	0.00015003	0.000721482	-0.0393448
CARM1	0.673343	6.04468	3.17811	0.00188477	0.00690777	-2.41304
PCDH17	0.673333	5.07411	4.1969	5.21043e-05	0.000279612	0.966775
PALD1	0.673291	4.89345	3.00793	0.00320418	0.0110136	-2.90218
U2SURP	0.673133	6.17048	4.88294	3.25095e-06	2.27189e-05	3.6312
FAM83F	0.673077	3.29019	2.92775	0.00408463	0.0135747	-3.12461
ZNF791	0.673005	7.53311	4.12774	6.7891e-05	0.000355563	0.7144
SLC3A2	0.672979	7.70691	2.98966	0.00338784	0.0115575	-2.95332
PKP4	0.672898	4.69282	5.33579	4.54419e-07	3.74631e-06	5.53665
KIAA1671	0.672699	4.37028	5.59463	1.4128e-07	1.28028e-06	6.67246
UBAC2	0.672236	7.68259	3.32328	0.0011793	0.00454014	-1.97789
C9orf142	0.671415	5.94917	4.10527	7.39405e-05	0.000383321	0.633085
TRIL	0.671277	5.72652	1.98695	0.0492015	0.111109	-5.32972
GMPR	0.671245	3.36322	2.50894	0.0134407	0.0377675	-4.2004
SOX12	0.671065	3.94566	5.83069	4.74585e-08	4.78608e-07	7.73552
GGTLC1	0.670745	5.43244	2.38837	0.0184796	0.0493385	-4.48253
AP3D1	0.670401	6.90988	5.10273	1.26686e-06	9.53734e-06	4.54249
RBM47	0.670316	4.75163	6.19916	8.26706e-09	9.5679e-08	9.4427
EMC9	0.67016	6.48928	2.77695	0.00636706	0.019924	-3.52881
AQP3	0.66946	4.35509	2.85725	0.00503711	0.0163059	-3.31588
TGIF1	0.669444	4.34343	5.30555	5.19836e-07	4.22434e-06	5.40609
ZNF267	0.669033	6.44104	3.46687	0.000731069	0.00298109	-1.53163
EPM2AIP1	0.669	6.43438	3.98669	0.000115415	0.00057293	0.209574
RIIAD1	0.668772	2.95116	2.45036	0.0157111	0.0430997	-4.33905
THY1	0.668687	7.24118	2.75902	0.00670455	0.0208199	-3.5756
ZNF783	0.66815	5.73529	4.37241	2.62824e-05	0.000151448	1.62101
CHTOP	0.668045	6.97425	6.1463	1.06566e-08	1.20473e-07	9.19438
XPO6	0.667895	8.02486	5.09255	1.32408e-06	9.92067e-06	4.49971
AP1G1	0.667718	6.40024	4.02143	0.000101392	0.000510377	0.33266
DIS3L2	0.667381	4.64624	6.03381	1.82279e-08	1.98182e-07	8.66971
RBM5	0.667357	6.08505	4.50121	1.57257e-05	9.56538e-05	2.11344
ZDHHC12	0.667198	4.29036	3.9546	0.000130001	0.000635623	0.0965803
MTA1	0.667019	5.248	6.16621	9.68561e-09	1.10226e-07	9.28781
C16orf91	0.666683	6.10888	3.53996	0.000570045	0.00239169	-1.29856
ANKRD50	0.666132	5.55683	3.62978	0.000417821	0.00180788	-1.00676
ANKRD52	0.666053	4.54815	4.29319	3.58757e-05	0.000200568	1.32326
FAM134A	0.666044	7.65251	3.63743	0.000406811	0.00176547	-0.981637
TNFSF13	0.665706	6.96146	2.74852	0.00690982	0.0213869	-3.60291
HNRNPA2B1	0.665588	8.14114	4.45877	1.86449e-05	0.000111261	1.95005
NR2F2	0.665453	6.19341	3.10767	0.00235365	0.00841377	-2.61829
NCOA3	0.665281	5.1935	4.28832	3.65646e-05	0.000204032	1.30508
TBC1D10C	0.665178	4.93854	2.09441	0.0383231	0.0901314	-5.11704
RAD21	0.66496	9.54493	3.47073	0.000721595	0.00294775	-1.51943
OAS3	0.664819	3.90905	3.55548	0.000540471	0.00228023	-1.24858
OXLD1	0.664289	7.81912	3.00464	0.00323658	0.0111156	-2.91141
RPN1	0.663913	8.41174	3.45517	0.000760513	0.0030864	-1.56857
CBX5	0.663802	5.6628	6.28667	5.4182e-09	6.47967e-08	9.85613
CDK5	0.663754	4.97577	2.54536	0.0121816	0.0347546	-4.1127
LOC100507516	0.663702	3.0375	2.42881	0.0166283	0.0451143	-4.3893
GEN1	0.663397	3.76589	5.07559	1.42511e-06	1.06051e-05	4.42853
MAD2L1	0.662847	4.24955	4.73278	6.10082e-06	4.00883e-05	3.02405
CEP164	0.66272	5.50244	5.88122	3.74633e-08	3.84633e-07	7.96626
EFNB2	0.662253	6.67761	2.25366	0.0260292	0.0655278	-4.7828
[truncated: 7,095 more rows]
