# Supplementary material for: Identification of long-term survival-associated gene in breast cancer
Source: Aging (Albany NY). 2020 Oct 20;12(20):20332–49. doi: 10.18632/aging.103807 (PMC7655188; doi:10.18632/aging.103807)
Supplement: Supplementary Table 2 [file aging-12-103807-s003..xlsx]

## Sheet: Table S2_DEG_sort_0.05
Supplementary Table 2. Differential expression genes (DEGs) between patients with a survival time greater than 5 years and patients with a survival time less than 5 years (life time).
DEG	logFC	AveExpr	t	P.Value	adj.P.Val	B
SCUBE2	2.80495	6.63958	4.77418	5.97953e-06	0.00706017	3.68931
NAT1	2.0308	8.38696	3.50047	0.000687485	0.051718	-0.516081
ANKRD30A	1.96229	7.88782	3.00696	0.00331481	0.104936	-1.88
LINC00993	1.88975	8.09528	3.10677	0.00244355	0.0950569	-1.61764
FBP1	1.8598	7.30646	5.61281	1.68822e-07	0.00172722	6.88795
C6orf211	1.80702	8.44432	5.76559	8.5483e-08	0.00172722	7.49942
GATA3	1.78659	10.2595	4.864	4.14186e-06	0.00706017	4.01776
CPB1	1.77666	5.6935	2.21159	0.0292019	0.286998	-3.70611
AGR3	1.75224	7.70815	2.6113	0.0103644	0.172558	-2.84881
MLPH	1.73567	9.41661	3.64579	0.000419682	0.0438809	-0.083716
CYP2B7P	1.70287	4.54626	3.08894	0.00258169	0.0973746	-1.66503
GFRA1	1.6078	5.77508	3.34891	0.00113385	0.0676406	-0.95247
FOXA1	1.60152	6.52246	4.10706	8.04418e-05	0.0216579	1.37407
TPRG1	1.56236	5.14335	3.34148	0.00116152	0.0686906	-0.973446
NPY1R	1.55771	5.21158	3.29807	0.0013365	0.0742963	-1.09542
AGR2	1.52366	8.29142	2.97757	0.00362148	0.109296	-1.9559
TFF1	1.50139	8.51275	2.08827	0.0392364	0.32596	-3.94479
EVL	1.46322	7.88312	4.55287	1.45303e-05	0.0105217	2.89629
TBC1D9	1.45102	7.80178	4.55221	1.45686e-05	0.0105217	2.89394
CYP4X1	1.44031	7.37826	2.75059	0.00702723	0.148238	-2.52098
AGTR1	1.42975	3.90817	3.81382	0.00023333	0.0358977	0.432649
C8orf4	1.42103	7.29012	3.75846	0.000283663	0.0389348	0.260603
PDZK1	1.37398	4.14446	2.82651	0.0056527	0.133563	-2.33619
NRIP3	1.36857	4.53214	4.63822	1.03471e-05	0.00920532	3.19933
BMPR1B	1.36346	5.66577	2.97628	0.00363559	0.10956	-1.95924
CA12	1.30687	6.00042	4.46322	2.06742e-05	0.011751	2.58185
GPR160	1.30071	6.67378	3.62981	0.000443383	0.0442561	-0.131928
REEP6	1.28815	6.82085	3.41053	0.000926809	0.0608997	-0.776867
AR	1.2723	6.87977	3.82267	0.000226119	0.0355009	0.460318
STC2	1.25043	6.44271	2.7684	0.00667998	0.143381	-2.47803
ACADSB	1.23253	5.55087	4.48022	1.93429e-05	0.011751	2.64118
DNAJC12	1.23225	5.37879	3.67364	0.000381223	0.0438809	0.000677233
CLSTN2	1.23126	5.09261	3.05996	0.00282168	0.100588	-1.74157
PGR	1.2043	4.29651	3.16131	0.00206256	0.0889676	-1.47133
LRG1	1.2041	5.72677	3.61644	0.000464162	0.0448004	-0.172105
PKIB	1.20335	5.62468	3.47984	0.000736574	0.0536362	-0.576359
ZNF703	1.19983	8.71533	3.87028	0.000190826	0.0322043	0.609987
GATA3-AS1	1.19846	3.91024	3.72148	0.000322856	0.0408676	0.146735
TFF3	1.16705	8.24305	2.02433	0.0455214	0.34487	-4.06362
NELL2	1.1591	6.31627	3.03025	0.00308909	0.103621	-1.81942
UGCG	1.15487	8.37833	5.50686	2.69258e-07	0.00182401	6.46864
C15orf48	1.15228	8.70602	3.00948	0.00328971	0.104851	-1.87347
AZGP1	1.14923	11.0309	2.31237	0.0227444	0.251081	-3.5019
SIDT1	1.13559	6.24513	3.53603	0.000610026	0.0498731	-0.411522
SERPINI1	1.12903	5.87476	3.14408	0.00217653	0.0906843	-1.51779
DNALI1	1.12653	4.59364	3.90351	0.000169371	0.0317952	0.715272
RBM24	1.12111	3.62319	3.24008	0.00160893	0.0799519	-1.25638
C1orf64	1.11795	5.32482	3.04601	0.0029444	0.101599	-1.77819
GALNT6	1.11587	6.67785	3.41562	0.000911385	0.060352	-0.762235
LONRF2	1.09604	4.4252	4.16441	6.49413e-05	0.020091	1.56392
CAPN8	1.09548	6.48751	2.36094	0.0201084	0.236199	-3.40056
LRP2	1.09196	5.12354	2.74119	0.00721717	0.150692	-2.54357
SYBU	1.08141	5.5926	3.14345	0.00218078	0.0906843	-1.51947
INSM1	1.08075	3.23032	2.88827	0.00472107	0.123	-2.18272
CADPS2	1.07503	6.74558	4.32857	3.48348e-05	0.0154954	2.11732
RERG	1.05438	5.88025	3.16022	0.00206962	0.0889676	-1.47428
LOC101926959	1.04275	4.02184	2.86514	0.00505207	0.127117	-2.24052
ADRA2A	1.03769	4.65153	3.4707	0.000759352	0.0545188	-0.602964
RTN1	1.0355	5.23535	3.24464	0.00158579	0.0799519	-1.24382
KCNE4	1.03416	5.00967	2.41944	0.0172952	0.219027	-3.27603
HOXB2	1.03285	6.02597	2.68948	0.00834791	0.159789	-2.66662
RARRES3	1.03161	8.20687	3.19513	0.0018549	0.0851612	-1.37958
KIF13B	1.03052	6.77866	4.04932	9.96022e-05	0.023879	1.18478
CYP4F8	1.02913	3.41582	2.4603	0.0155438	0.209386	-3.18745
SHISA2	1.02849	5.2078	2.14551	0.0342591	0.308603	-3.83556
ABAT	1.02779	6.35612	4.43899	2.27249e-05	0.0121458	2.49758
C16orf89	1.02034	4.53921	2.24917	0.0266276	0.275179	-3.63092
SIAH2	0.966315	5.49305	3.42162	0.00089353	0.0597497	-0.744981
ANXA9	0.966194	4.29276	3.00263	0.00335849	0.105188	-1.89123
SERPINA5	0.963601	5.32052	2.36903	0.0196965	0.233641	-3.3835
P4HTM	0.960791	7.64963	3.95181	0.000142255	0.0285374	0.869418
FAM179B	0.952846	6.64775	5.03542	2.03391e-06	0.00520223	4.65457
HSPA2	0.951571	7.21147	2.75947	0.00685215	0.146051	-2.4996
SLC16A6	0.951232	5.58086	3.17455	0.00197883	0.087025	-1.43551
NBPF4	0.949333	3.60853	2.70668	0.0079551	0.156452	-2.62592
LINC01116	0.948551	5.12578	3.5324	0.000617541	0.0498731	-0.422237
TTC8	0.947273	6.41716	4.28405	4.13059e-05	0.0158584	1.96579
SH3BGRL	0.942775	9.28498	3.94447	0.00014609	0.0288134	0.845907
SLC39A6	0.940563	8.40271	2.61317	0.0103116	0.172558	-2.84452
DEGS2	0.935971	5.76076	2.91461	0.00436844	0.118964	-2.11642
ARSG	0.932704	4.56111	4.55691	1.43001e-05	0.0105217	2.91054
PREX1	0.929954	6.908	3.02584	0.00313065	0.103938	-1.83091
CACNA1D	0.928699	3.77185	4.05476	9.76263e-05	0.023879	1.20252
UGDH	0.926783	9.34845	3.74022	0.00030239	0.0396635	0.204341
FBXL7	0.924836	6.17166	3.11515	0.00238108	0.0940572	-1.59531
DHCR24	0.921907	9.47939	3.37239	0.00105028	0.0657214	-0.885837
ENPP5	0.916793	4.91412	2.62327	0.0100297	0.171465	-2.82123
SOWAHA	0.91602	3.72374	3.20666	0.00178864	0.0837507	-1.34809
CLIC6	0.908902	4.11759	2.81011	0.00592689	0.135807	-2.37647
SYTL2	0.908685	6.06069	4.15701	6.67671e-05	0.020091	1.53931
DYNLRB2	0.90476	3.65301	3.30152	0.00132175	0.0741412	-1.08578
KIAA1324	0.897672	6.93233	3.11657	0.00237065	0.0940082	-1.59152
TGFBR3	0.893921	7.5994	2.22657	0.0281507	0.283335	-3.67627
GJA1	0.889514	9.71242	2.97081	0.00369561	0.110271	-1.97327
FAM174A	0.884986	8.26765	3.906	0.000167863	0.0317952	0.72317
DACH1	0.880237	6.40204	2.17183	0.0321602	0.298847	-3.78442
NCEH1	0.871394	5.15769	3.09836	0.00250784	0.096323	-1.64003
ERBB4	0.869266	4.9422	3.67967	0.000373354	0.0438809	0.0189997
NOSTRIN	0.865293	4.8376	2.75851	0.00687078	0.146162	-2.50191
GLCE	0.863071	5.65026	3.58145	0.000523038	0.0467354	-0.276799
CFD	0.861964	9.52694	2.0168	0.0463155	0.347273	-4.0774
FLJ38379	0.85795	4.1942	2.84193	0.00540551	0.130559	-2.29813
ECI2	0.85609	7.72231	2.94225	0.00402463	0.114781	-2.04631
CYP4B1	0.85041	3.78961	2.86007	0.0051275	0.128263	-2.25316
EGR3	0.849687	6.43159	3.21739	0.00172901	0.0823727	-1.31874
GRIA2	0.848858	3.17811	2.21899	0.0286785	0.284413	-3.69139
ACOX2	0.845943	6.0492	2.8217	0.00573191	0.134503	-2.34803
REPS2	0.845711	4.39446	3.26401	0.0014908	0.077818	-1.19025
NTN4	0.845	8.44934	2.07065	0.040889	0.331223	-3.97788
KCNJ3	0.843927	3.14727	2.98573	0.0035338	0.107923	-1.93489
STK32B	0.83795	3.82297	2.88107	0.00482193	0.124352	-2.20076
GDAP1	0.837384	4.38227	3.33509	0.00118588	0.069336	-0.991503
GSTM2	0.837198	5.72232	3.1898	0.00188627	0.0851612	-1.39408
RAI2	0.835015	5.66387	2.47238	0.0150572	0.206363	-3.16101
CXXC5	0.831508	9.35309	3.38573	0.00100545	0.0639156	-0.847841
MYB	0.830574	4.97791	4.1899	5.90109e-05	0.0188669	1.64891
IGFBP4	0.820752	6.87179	3.16153	0.00206112	0.0889676	-1.47073
PCAT18	0.820124	3.30778	2.46427	0.0153823	0.208446	-3.17877
IFI35	0.816969	7.51449	2.84864	0.00530112	0.130013	-2.28153
HIST2H2BE	0.81564	7.22801	2.08839	0.0392258	0.32596	-3.94457
CRIP1	0.80934	10.0364	2.23323	0.0276944	0.281651	-3.66296
CFB	0.808814	6.49476	3.66791	0.00038886	0.0438809	-0.0167445
CORO6	0.808667	4.00219	2.40801	0.0178157	0.221082	-3.30058
WWP1	0.806204	8.96641	3.51007	0.000665697	0.0507747	-0.487922
ADAMTS15	0.803437	4.1069	3.97753	0.000129557	0.0276146	0.952084
TMEM150C	0.80131	6.06331	2.2569	0.0261234	0.272279	-3.61531
ALDH2	0.801037	8.68679	3.11093	0.00241234	0.0947433	-1.60655
PRR15	0.798381	5.95725	2.48441	0.0145862	0.204427	-3.13457
LYPD6B	0.79629	5.57162	2.67777	0.00862534	0.160447	-2.69421
CARTPT	0.793308	2.84253	1.99232	0.0489793	0.356026	-4.12185
LRBA	0.78175	7.60709	3.6517	0.000411231	0.0438809	-0.0658604
RAB31	0.78118	8.79157	3.14001	0.00220427	0.0909474	-1.52872
TTC36	0.775691	4.84673	2.2859	0.0243056	0.261209	-3.55633
CACNA2D2	0.775585	4.64615	2.99311	0.00345624	0.107361	-1.91585
GPD1L	0.77398	7.50592	3.05313	0.00288117	0.101599	-1.75952
RET	0.773467	4.12855	3.05486	0.002866	0.101599	-1.75498
ARNT2	0.772361	5.15338	2.20707	0.0295259	0.288243	-3.71507
C6orf141	0.771985	3.85263	2.62029	0.0101122	0.171573	-2.82812
SLC27A2	0.771171	4.22946	2.14912	0.0339644	0.307786	-3.82858
INPP5J	0.766017	3.80976	3.0403	0.00299607	0.101943	-1.79315
MICB	0.761107	6.04648	2.47436	0.0149786	0.206363	-3.15665
APOL1	0.759744	6.07168	3.23548	0.00163266	0.0805001	-1.26907
STEAP2	0.758419	5.13544	2.89317	0.00465358	0.122726	-2.17043
PHOSPHO2	0.754546	7.32899	3.12521	0.002308	0.0927057	-1.56842
MREG	0.754126	7.38145	3.97296	0.000131731	0.0277222	0.937367
FAM214A	0.752239	6.03064	3.01108	0.00327378	0.104669	-1.8693
FAM102B	0.752057	7.86541	2.81431	0.00585561	0.135234	-2.36619
UBXN10-AS1	0.749454	4.519	2.81449	0.00585257	0.135234	-2.36574
TPBG	0.748873	6.76382	3.9005	0.000171216	0.0318492	0.70571
CYP2A6	0.747077	3.49038	2.22433	0.0283062	0.283367	-3.68076
FANK1	0.746757	6.3212	2.68712	0.00840328	0.1601	-2.6722
GSTT2	0.74363	3.13433	2.87773	0.00486936	0.124636	-2.20911
GALNT7	0.742239	7.75311	2.60524	0.0105378	0.173192	-2.86274
PRRT3	0.739283	4.74522	3.2138	0.00174877	0.0826407	-1.32858
NPNT	0.73468	4.72645	3.38128	0.00102019	0.0640343	-0.860522
NUCB2	0.733316	7.13651	3.44558	0.000825469	0.0569817	-0.675858
CYB5A	0.732545	8.0564	3.85781	0.000199525	0.0329249	0.570657
SCCPDH	0.731729	5.69021	2.6715	0.00877724	0.161366	-2.70893
HSPB1	0.728372	10.9833	2.35017	0.0206684	0.238532	-3.4232
NME5	0.721577	4.29601	3.12175	0.00233288	0.0930515	-1.57767
C10orf32	0.721202	7.90741	3.58304	0.000520219	0.0466874	-0.272063
MRPS30	0.71751	6.70194	2.0392	0.0439874	0.340163	-4.03629
FAM198B	0.716503	6.21856	4.29568	3.95111e-05	0.0158525	2.00529
MAPT	0.71579	5.04301	3.32625	0.00122032	0.0701408	-1.01639
VAV3	0.714834	6.23805	3.45232	0.00080722	0.0565815	-0.656344
HIST1H2AC	0.712113	8.32044	2.04652	0.0432489	0.338111	-4.02276
SLC40A1	0.708559	8.08818	2.63063	0.00982873	0.17026	-2.80421
CELSR2	0.708447	5.14251	2.84187	0.00540643	0.130559	-2.29828
HEBP1	0.703315	9.20504	2.53247	0.0128333	0.190839	-3.02779
SMIM14	0.700645	7.15454	4.26038	4.52014e-05	0.0162934	1.88569
PLA2G16	0.70036	6.24706	3.01251	0.00325973	0.104642	-1.86561
C1orf168	0.699838	3.12697	3.78386	0.000259409	0.0377077	0.339299
GSAP	0.697922	6.69477	3.55536	0.000571456	0.0490509	-0.354348
SETBP1	0.694623	5.61472	2.7574	0.00689253	0.146176	-2.50458
RAB11FIP1	0.694042	7.03098	3.47174	0.000756742	0.0545188	-0.599956
SLC38A6	0.6927	6.23609	3.34532	0.00114715	0.0680375	-0.962618
INPP4B	0.692194	4.95385	3.44199	0.000835339	0.0569817	-0.686231
PPM1J	0.692091	4.55056	3.47517	0.000748139	0.0542852	-0.589969
C9orf91	0.689929	6.00464	3.44297	0.000832635	0.0569817	-0.683402
ADIRF	0.687499	7.38081	2.08546	0.0394961	0.326479	-3.95009
DUSP5	0.685919	4.88197	2.75698	0.00690088	0.146176	-2.50561
RSPH1	0.685196	4.74367	2.46975	0.0151619	0.207243	-3.16677
ARHGAP36	0.677146	2.78899	2.22473	0.0282782	0.283367	-3.67995
FLNB	0.676832	8.25715	3.21618	0.00173563	0.0823727	-1.32205
PCP2	0.675528	3.65035	3.66347	0.000394861	0.0438809	-0.0301939
TSPAN5	0.674554	6.17009	2.68978	0.00834096	0.159789	-2.66592
RMND1	0.671946	3.94122	3.10782	0.00243569	0.095025	-1.61486
TCEAL1	0.670956	7.15809	2.56389	0.0117923	0.182522	-2.95705
TNFSF10	0.669974	9.43909	2.64456	0.00945828	0.166888	-2.77188
CIRBP	0.666807	7.66505	3.9663	0.000134964	0.0277222	0.915931
MAGED2	0.665088	8.54118	2.7285	0.00748108	0.153078	-2.57397
PNPLA4	0.664917	5.39123	3.83245	0.000218394	0.0353123	0.490964
LOXL1-AS1	0.663271	4.52039	2.90943	0.00443586	0.119897	-2.1295
RAB26	0.662521	6.23001	2.60662	0.0104982	0.172975	-2.85958
SNX10	0.662515	7.40283	2.77037	0.0066426	0.142989	-2.47327
TCEAL3	0.661783	8.30565	2.71427	0.00778709	0.155834	-2.60788
KLHDC9	0.66111	6.66113	2.56297	0.0118216	0.182687	-2.95912
SUSD3	0.6605	3.33951	4.1461	6.95487e-05	0.020514	1.5031
THRSP	0.658285	4.27579	2.33594	0.0214293	0.243498	-3.45295
SYT17	0.657887	6.36962	2.24763	0.0267286	0.275709	-3.63401
ABLIM3	0.657621	3.92281	3.19748	0.00184123	0.0851612	-1.37317
SYNC	0.656681	4.38207	3.07563	0.00268948	0.097922	-1.70026
CYBRD1	0.656523	6.97697	2.32898	0.0218103	0.245942	-3.46745
KIAA1598	0.656112	8.53184	3.7761	0.000266602	0.0378833	0.315215
BRINP2	0.65605	2.73946	2.35396	0.0204695	0.23796	-3.41523
ENPP4	0.652767	4.89265	2.7703	0.00664385	0.142989	-2.47343
CTSO	0.651442	5.86884	3.15103	0.00212984	0.0901391	-1.49906
SELT	0.649735	6.38256	3.54462	0.000592582	0.0496943	-0.386129
AP1M2	0.6466	6.8951	2.28165	0.0245647	0.263164	-3.56501
SLC19A2	0.645487	8.52996	2.31228	0.0227497	0.251081	-3.50209
DCLK1	0.644219	5.14451	2.41097	0.0176794	0.220853	-3.29422
TMEM41B	0.643891	7.49089	3.3578	0.00110149	0.0668517	-0.927281
ACSS3	0.642303	4.32861	2.81914	0.0057745	0.134883	-2.35433
PMAIP1	0.640908	5.35393	2.14595	0.0342228	0.308603	-3.8347
RBKS	0.640535	5.29333	3.6066	0.000480058	0.0454948	-0.201635
MCCC2	0.640194	4.56793	4.53773	1.54262e-05	0.0105217	2.84292
PGLYRP2	0.639794	2.98179	3.15003	0.00213652	0.0901391	-1.50177
MAN2B2	0.637351	7.13238	3.86855	0.000192011	0.0322043	0.604527
ALDH3A2	0.637075	6.51257	3.93257	0.000152519	0.0296386	0.807848
KAL1	0.636717	3.93175	4.22347	5.19924e-05	0.0174571	1.76134
MAN1A1	0.636401	5.83667	3.05327	0.00287995	0.101599	-1.75915
ABCG1	0.634502	5.71532	3.27828	0.00142424	0.0760058	-1.15062
TXNDC16	0.634294	5.50607	3.1919	0.00187387	0.0851612	-1.38838
KIAA0232	0.633726	6.95326	4.19037	5.89084e-05	0.0188669	1.65045
FLJ33534	0.63244	2.94697	2.44747	0.0160759	0.212809	-3.2154
CHRNA9	0.632439	2.72362	2.07369	0.0405995	0.330545	-3.97218
ATP7B	0.632192	3.29039	2.6221	0.0100619	0.171465	-2.82392
P2RX4	0.631613	4.91875	3.11353	0.00239304	0.0943476	-1.59963
RAB17	0.629734	5.07171	2.9204	0.00429422	0.118103	-2.10177
OLFML3	0.628045	7.42059	2.11503	0.0368369	0.317916	-3.89406
XBP1	0.624575	7.79361	3.38474	0.00100869	0.0639156	-0.850644
BBS4	0.624497	6.7433	3.92351	0.000157594	0.0301372	0.77893
SLC7A8	0.624062	4.83824	4.43679	2.29206e-05	0.0121458	2.48994
BLNK	0.623484	7.24079	2.37718	0.0192893	0.230308	-3.36626
GSTM1	0.623237	4.04	2.98148	0.00357926	0.108663	-1.94585
ANKRA2	0.623155	5.92762	3.60167	0.000488204	0.0456104	-0.216389
DNMBP	0.621412	5.33388	2.77132	0.00662452	0.142989	-2.47096
ITPR1	0.6213	5.14846	3.48473	0.000724637	0.053436	-0.562082
PRSS23	0.621186	5.57361	3.50087	0.000686555	0.051718	-0.514898
TPST2	0.620156	7.57729	2.79531	0.00618477	0.138612	-2.41266
ACP5	0.619441	6.20428	2.13927	0.0347736	0.30978	-3.84759
LINC01137	0.619191	4.20389	4.67677	8.86524e-06	0.00907003	3.33737
GREB1L	0.619142	3.57354	2.86482	0.00505687	0.127117	-2.24133
RAB30	0.617466	4.57331	2.96636	0.00374528	0.110388	-1.98471
NOVA1	0.6164	3.21859	2.95525	0.00387166	0.112852	-2.01314
ALCAM	0.616346	7.06764	2.9804	0.00359093	0.108856	-1.94864
LRRC6	0.61614	4.34073	2.94892	0.00394541	0.113754	-2.02929
FBXL16	0.612579	4.69928	3.88538	0.000180776	0.0322043	0.657741
TTC6	0.610068	3.77529	2.85021	0.0052769	0.130013	-2.27763
ZCCHC24	0.608327	6.29095	2.99155	0.00347251	0.107461	-1.91988
GLRB	0.606682	3.05626	2.6784	0.00861018	0.160447	-2.69272
MYO5C	0.604446	7.87054	2.58078	0.0112646	0.179065	-2.91869
GBP3	0.604183	7.71563	2.09093	0.0389926	0.325276	-3.93979
OGN	0.602786	3.55717	2.21724	0.0288018	0.284844	-3.69488
RTN4RL1	0.602656	5.00003	2.48229	0.0146684	0.204737	-3.13924
IER3	0.601685	11.3477	2.72981	0.00745343	0.152971	-2.57084
NME3	0.601312	9.45376	3.08349	0.00262535	0.0976189	-1.67948
ASPN	0.600014	6.00157	2.41643	0.0174311	0.219576	-3.28251
C17orf58	0.599797	9.01252	2.7872	0.00633038	0.140796	-2.43242
NEK5	0.598488	4.97524	2.19623	0.0303157	0.292053	-3.73652
MEIS3P1	0.597647	6.70012	2.83097	0.00558012	0.132922	-2.3252
WNK4	0.596976	3.62467	2.30924	0.0229243	0.252469	-3.50836
CRYZ	0.595928	6.58581	2.29872	0.0235381	0.256206	-3.53004
PBX3	0.593434	5.79415	2.19011	0.0307695	0.293934	-3.74858
AGL	0.592902	8.30412	2.13926	0.0347749	0.30978	-3.84762
PRIMPOL	0.592301	5.34098	2.96998	0.00370484	0.110271	-1.97541
DNAH5	0.590507	4.45142	2.63039	0.00983518	0.17026	-2.80476
MUM1L1	0.589669	4.07891	2.17845	0.0316503	0.297214	-3.77147
SPR	0.588988	6.57635	3.08679	0.00259886	0.0973952	-1.67074
IRS1	0.588725	5.76207	2.75715	0.0068975	0.146176	-2.5052
SLC22A4	0.587896	2.79369	3.09407	0.00254126	0.0968327	-1.65143
OSCP1	0.587438	4.83251	3.27316	0.00144776	0.0767461	-1.16484
ABCC5	0.587325	4.83595	3.22103	0.00170923	0.0823128	-1.30877
HEPACAM2	0.586634	2.91883	2.30706	0.0230499	0.253574	-3.51285
RNASE4	0.586402	6.13473	2.46573	0.0153235	0.207924	-3.17558
HPN	0.584251	5.37217	2.52972	0.0129282	0.191833	-3.03395
C5orf30	0.58333	7.63542	2.3731	0.0194923	0.232125	-3.3749
SDSL	0.583198	5.94302	2.94463	0.00399624	0.114686	-2.04025
MAOA	0.58312	4.31351	2.21278	0.0291175	0.286857	-3.70375
ENPP1	0.582171	4.6803	2.95322	0.00389518	0.1131	-2.01832
LINC00173	0.582051	3.93806	3.04027	0.00299636	0.101943	-1.79323
SDC4	0.579665	9.47999	2.98902	0.00349901	0.107872	-1.9264
ELOVL2	0.57934	3.7598	2.85716	0.00517111	0.128896	-2.26037
APH1B	0.578144	4.6567	3.86935	0.00019146	0.0322043	0.607064
SARAF	0.577902	11.3472	3.0142	0.00324307	0.104506	-1.86121
APBB2	0.57764	4.62318	4.76485	6.21068e-06	0.00706017	3.6554
SUMF1	0.57682	7.82578	3.28421	0.0013974	0.0756443	-1.13411
COQ10A	0.576349	4.48018	3.21258	0.00175553	0.0827686	-1.33192
KIAA1377	0.575632	4.0884	3.38241	0.00101644	0.063995	-0.857311
METTL25	0.574575	6.02816	3.30134	0.00132253	0.0741412	-1.08629
PLEKHF2	0.573266	6.37894	2.55844	0.0119671	0.183424	-2.96936
THSD4	0.572334	4.00869	3.80896	0.000237385	0.0362491	0.417464
TESK2	0.572307	5.01471	2.92563	0.00422823	0.117392	-2.08853
SMOC2	0.572034	5.45443	2.43583	0.0165725	0.215344	-3.24065
C4orf32	0.571831	5.4054	3.29011	0.00137116	0.0745084	-1.11766
PPP1R3C	0.571707	4.28998	3.04284	0.00297304	0.10173	-1.78651
PLCD4	0.570877	2.97048	2.57029	0.0115896	0.18112	-2.94252
CYB5D1	0.570395	5.42828	3.03941	0.00300418	0.101943	-1.79547
CXorf40A	0.569002	8.87024	2.52938	0.01294	0.191868	-3.03471
BCAS1	0.567578	4.8194	2.23586	0.027516	0.280534	-3.65769
MTERF2	0.56492	5.81391	2.87056	0.00497264	0.126085	-2.22701
ATP6AP1	0.564356	8.67676	2.33752	0.0213438	0.243172	-3.44966
NBEA	0.564316	4.87269	2.58676	0.0110826	0.177444	-2.90504
IGF1R	0.564078	5.04812	2.77592	0.00653815	0.142475	-2.45983
CXorf40B	0.564062	8.6318	2.43491	0.0166126	0.215428	-3.24265
LOC145837	0.563301	3.47866	2.0897	0.0391047	0.325401	-3.94209
SHOC2	0.562714	6.93666	3.03831	0.00301434	0.102118	-1.79837
TRIL	0.5626	5.82083	2.13675	0.0349836	0.310367	-3.85245
NPTN	0.562354	10.5296	2.95222	0.00390686	0.1131	-2.02089
SLC16A4	0.559245	4.29518	3.00867	0.00329779	0.104936	-1.87558
FGD3	0.558767	5.30372	2.5021	0.0139176	0.199707	-3.09548
LINC00893	0.556955	3.48884	2.45389	0.0158076	0.211092	-3.20143
HMGCL	0.556504	8.00697	4.13086	7.36221e-05	0.0206364	1.45262
RALGPS2	0.554035	4.95842	3.88658	0.000179995	0.0322043	0.661561
EAF1	0.553941	6.52226	3.40804	0.000934421	0.0608997	-0.783998
BRI3BP	0.552902	7.11378	2.82293	0.00571158	0.134249	-2.34501
MISP	0.551375	5.37886	2.65432	0.00920609	0.164663	-2.74913
NEK10	0.550958	3.62683	2.85351	0.00522649	0.129341	-2.26945
GLUL	0.550098	8.37993	2.93656	0.00409336	0.115237	-2.0608
GREB1	0.549984	3.363	3.763	0.000279177	0.0389348	0.274636
F3	0.549937	6.25378	2.02029	0.0459464	0.34641	-4.07103
MRFAP1L1	0.549889	8.88105	3.32139	0.00123968	0.0706581	-1.03008
GSTM3	0.549884	6.90346	2.04371	0.0435315	0.338368	-4.02797
ABHD2	0.549605	4.93138	3.16312	0.00205096	0.0889124	-1.46646
KIAA1324L	0.54934	3.75388	4.26683	4.41063e-05	0.0162934	1.90749
NFKBIZ	0.548923	9.30873	2.05197	0.0427059	0.337109	-4.01267
CPLX1	0.548901	3.46772	2.29557	0.0237246	0.256889	-3.53651
POLI	0.547568	5.36003	2.72553	0.00754395	0.153749	-2.58105
DLG5	0.547167	7.42773	2.27573	0.0249299	0.265133	-3.57709
PTPRN2	0.546796	3.02983	3.12421	0.00231515	0.0927057	-1.57108
TSPAN15	0.546505	6.69899	2.17079	0.0322408	0.299189	-3.78645
BIK	0.545363	7.13199	2.0725	0.0407124	0.330545	-3.97441
ZNF844	0.544945	3.67259	5.05999	1.83478e-06	0.00520223	4.74689
ASAH1	0.543766	7.99088	3.59506	0.000499342	0.0456381	-0.236164
CRNKL1	0.543455	6.46354	2.22696	0.028124	0.283335	-3.6755
CAMK2N1	0.541812	5.03964	2.76191	0.00680476	0.145192	-2.49372
COL6A3	0.541473	11.3298	2.38514	0.0188987	0.228241	-3.34937
RABEP1	0.541454	6.25825	3.1332	0.00225142	0.0922831	-1.54699
SPOPL	0.541318	7.5546	2.68208	0.00852232	0.160447	-2.68407
WFS1	0.541202	4.68599	3.36829	0.00106446	0.0662308	-0.897513
KIAA1522	0.540778	7.50582	2.57533	0.0114324	0.179807	-2.93108
MGST2	0.540311	8.09127	3.33506	0.00118598	0.069336	-0.991577
SHROOM2	0.539161	3.96859	3.08802	0.00258903	0.0973746	-1.66748
ATG16L1	0.538964	4.95361	3.65159	0.000411387	0.0438809	-0.0661918
SLC9A3R1	0.537058	9.29936	2.13503	0.0351272	0.310619	-3.85576
ARHGEF3	0.536738	7.27546	3.18238	0.00193077	0.0862607	-1.41425
NR4A2	0.535036	6.14909	2.10086	0.038091	0.321542	-3.92099
TVP23B	0.534719	8.33318	3.87133	0.00019011	0.0322043	0.613307
ARRDC4	0.534632	6.02934	2.39253	0.0185427	0.225577	-3.33365
BHLHE40	0.534427	6.37949	3.24916	0.00156311	0.0791694	-1.23134
AGBL2	0.534391	3.45243	3.58641	0.00051429	0.0463586	-0.262017
PLSCR4	0.532603	6.20588	2.3341	0.0215294	0.244199	-3.45679
GMPR2	0.531836	6.82776	2.25275	0.0263926	0.273718	-3.62369
C3orf52	0.531548	4.12489	3.20887	0.00177624	0.0835529	-1.34207
PDIK1L	0.530908	6.76082	2.79355	0.00621602	0.13916	-2.41694
APMAP	0.529867	10.2876	2.84753	0.00531819	0.130013	-2.28427
AK5	0.529584	3.61747	2.01741	0.0462509	0.347172	-4.07628
TMEM87B	0.528094	6.47318	3.45847	0.000790888	0.0559971	-0.638499
FAAH2	0.527988	4.3309	3.10879	0.00242839	0.095025	-1.61227
ZNF559	0.527447	6.09356	2.66329	0.00897988	0.16333	-2.72817
STXBP1	0.525936	6.41699	2.49174	0.0143057	0.20272	-3.1184
KCTD6	0.525478	5.17932	3.35898	0.00109725	0.0668517	-0.923922
KIAA0319L	0.525059	6.60001	3.25235	0.00154729	0.0787577	-1.22251
BTG2	0.523738	5.32671	2.6174	0.0101928	0.171659	-2.83478
COL1A2	0.52367	11.4258	2.11689	0.0366745	0.317916	-3.8905
HIGD1A	0.522929	7.76901	2.88626	0.0047491	0.12332	-2.18777
WDR54	0.520507	6.63713	2.32606	0.0219721	0.247	-3.47352
SHC2	0.519519	5.57651	2.03265	0.0446578	0.342591	-4.04835
GRAMD1C	0.518529	5.62618	2.53466	0.0127583	0.190442	-3.02289
CMYA5	0.518071	4.31489	2.37282	0.0195064	0.232125	-3.3755
FPGT	0.517334	4.82678	3.76993	0.00027245	0.0384473	0.296109
PAN2	0.515655	6.66774	2.7269	0.00751495	0.153617	-2.57779
SYTL4	0.515236	3.76534	4.13615	7.21828e-05	0.020514	1.47013
TMEM181	0.515133	8.08444	2.33797	0.021319	0.243024	-3.44871
IL6ST	0.514496	5.5985	3.07052	0.00273193	0.0986202	-1.71375
HOOK1	0.513287	6.80508	2.69179	0.0082942	0.159744	-2.66117
TSPAN13	0.512884	12.4883	2.89322	0.00465287	0.122726	-2.1703
PPP1R36	0.512505	3.20768	2.70856	0.00791333	0.156452	-2.62147
GPC4	0.512499	4.33873	2.14409	0.0343753	0.308603	-3.83829
RBBP8	0.512381	8.04596	2.13654	0.0350005	0.310367	-3.85284
GP2	0.511916	3.56335	2.93403	0.00412417	0.11576	-2.06721
PAPD4	0.511676	6.35316	3.22534	0.00168603	0.0815591	-1.29694
LINC00959	0.511587	4.95801	2.7256	0.00754257	0.153749	-2.5809
SMAP2	0.51029	6.19127	2.19086	0.0307134	0.293895	-3.7471
DPY19L2P2	0.508056	3.25836	2.6157	0.0102404	0.172129	-2.8387
ZNF680	0.507555	6.06454	2.64376	0.00947907	0.16692	-2.77373
PTP4A2	0.507067	10.038	3.27968	0.00141784	0.0759475	-1.14672
ESR1	0.507012	3.52302	4.93457	3.09569e-06	0.00703823	4.27835
ZBED5-AS1	0.506736	5.48642	2.85635	0.00518342	0.129031	-2.2624
MS4A7	0.506479	4.88293	2.11037	0.0372453	0.319099	-3.90294
PRKCD	0.506452	4.79245	2.49246	0.0142786	0.202613	-3.11681
MDM1	0.505196	4.76044	4.54152	1.51973e-05	0.0105217	2.85625
FAM174B	0.50504	7.31345	2.52236	0.0131857	0.192947	-3.05041
PEX12	0.50446	5.02335	3.00286	0.0033561	0.105188	-1.89062
ETNK2	0.503742	4.12515	2.42952	0.0168476	0.216542	-3.2543
ACSL5	0.503027	4.82971	2.08757	0.0393007	0.326103	-3.94611
NPEPPS	0.502896	6.82487	3.75578	0.00028634	0.0389348	0.252335
SHROOM1	0.502867	4.57063	3.18975	0.00188655	0.0851612	-1.39421
PTGR1	0.501592	6.23265	3.00613	0.00332316	0.104936	-1.88216
PHYHD1	0.499156	5.3951	2.2448	0.0269162	0.276763	-3.63972
KCNK6	0.498896	4.66039	2.32664	0.02194	0.246803	-3.47232
ASTN2	0.498174	3.93989	3.80363	0.000241903	0.0362816	0.400852
SLC7A2	0.497966	3.8304	3.00647	0.00331975	0.104936	-1.88127
TMEM205	0.497309	8.14488	2.27549	0.0249447	0.265152	-3.57757
BAG3	0.495732	8.41876	2.6129	0.0103192	0.172558	-2.84514
TMBIM6	0.494253	9.37422	2.67523	0.00868674	0.161016	-2.70019
PEX7	0.494065	5.21469	3.1972	0.00184285	0.0851612	-1.37394
FBXL5	0.493111	7.88396	3.15886	0.00207841	0.0891583	-1.47795
C7orf63	0.492659	3.58396	2.7119	0.00783931	0.156343	-2.61352
EDEM1	0.492229	6.39872	3.01165	0.00326823	0.104655	-1.86785
DDHD2	0.491004	7.60197	2.25983	0.0259344	0.270749	-3.60938
KIF3A	0.490551	5.77876	3.66902	0.000387363	0.0438809	-0.0133554
MEGF9	0.490436	5.41516	2.62955	0.00985807	0.170389	-2.80671
RPS16P5	0.490342	7.10256	2.06066	0.0418523	0.334113	-3.99652
SEMA3C	0.490078	5.65781	2.54482	0.0124146	0.187487	-3.00007
SLC29A3	0.489875	4.81139	2.32744	0.0218957	0.246441	-3.47066
CTSF	0.489194	7.8499	2.18754	0.0309621	0.294753	-3.75365
SERP1	0.488936	8.88666	2.44985	0.0159759	0.212409	-3.21022
CYP4F22	0.488634	2.80216	2.20587	0.029613	0.28868	-3.71747
FMO5	0.488495	3.87526	2.11078	0.0372097	0.319099	-3.90217
JKAMP	0.487945	7.4507	2.68211	0.0085217	0.160447	-2.68401
RAB11FIP2	0.486942	5.38383	3.19779	0.00183943	0.0851612	-1.37233
CCDC176	0.486758	4.45926	4.1366	7.20595e-05	0.020514	1.47165
NUDT18	0.486536	4.41445	2.63954	0.00959032	0.167724	-2.78355
SFXN2	0.486236	5.0786	2.97251	0.00367687	0.110127	-1.96891
COL4A5	0.486057	4.96623	3.12665	0.00229774	0.0927057	-1.56457
LIMA1	0.485893	6.94931	2.43068	0.0167968	0.216161	-3.25179
ABCA3	0.48418	6.40394	2.02195	0.0457713	0.345697	-4.06798
PNMA1	0.4838	8.28606	2.73356	0.00737478	0.151814	-2.56186
TMEM25	0.483382	4.1663	3.25041	0.00155691	0.0790507	-1.22789
DPCD	0.483085	6.9984	2.43154	0.0167593	0.216047	-3.24994
SRSF6	0.482584	7.46133	3.12873	0.00228291	0.0924906	-1.55898
PARP3	0.482308	4.21476	2.93679	0.00409047	0.115237	-2.0602
FBXO15	0.482263	3.51451	2.31821	0.0224119	0.24937	-3.4898
ITGAV	0.481682	9.97964	2.40655	0.017883	0.221082	-3.30369
CTR9	0.481379	7.89088	2.2249	0.0282665	0.283367	-3.67961
LRRN4CL	0.48065	3.30244	2.19103	0.0307012	0.293895	-3.74678
MAST4	0.480243	5.36903	3.01551	0.00323027	0.104506	-1.85782
CYP2A7	0.480192	3.04687	2.06107	0.041813	0.334113	-3.99577
CHURC1	0.47989	6.93853	2.73412	0.0073631	0.151805	-2.56052
ELOVL2-AS1	0.479635	2.75649	3.03997	0.00299912	0.101943	-1.79402
PTPLAD1	0.479231	9.20093	2.22722	0.0281064	0.283335	-3.67499
PTHLH	0.478855	3.02216	2.21739	0.0287914	0.284844	-3.69459
PSME1	0.477797	10.2986	2.28076	0.0246194	0.263345	-3.56683
HOXB3	0.477602	5.15003	2.16684	0.0325498	0.300692	-3.79417
SLC1A4	0.477495	5.96051	2.31339	0.0226857	0.25077	-3.49978
TNFSF13	0.47673	7.05499	2.5701	0.0115955	0.18112	-2.94295
DMXL1	0.475962	7.13649	2.87825	0.00486191	0.124636	-2.2078
AMPD3	0.472924	6.04754	2.18064	0.0314832	0.296734	-3.76718
SERINC1	0.472688	8.20947	2.35674	0.0203249	0.237234	-3.40939
MAST3	0.471983	5.5591	3.29773	0.00133796	0.0742963	-1.09637
ITGB5	0.471771	6.28561	3.07258	0.00271473	0.0984909	-1.70831
SH3BGR	0.470645	4.97936	2.02298	0.0456626	0.3453	-4.06609
RTN2	0.469813	4.52416	2.39178	0.0185785	0.225868	-3.33525
DDX60L	0.469553	5.06446	2.9423	0.00402402	0.114781	-2.04618
PEX11G	0.469005	4.8967	2.96599	0.00374937	0.110388	-1.98564
SLC4A8	0.467722	4.04466	3.08863	0.00258414	0.0973746	-1.66585
ECM2	0.467442	4.17246	2.90376	0.00451067	0.121087	-2.14379
RGL2	0.467226	8.5481	3.0686	0.00274802	0.0988224	-1.7188
LOC439911	0.466067	5.29208	2.70852	0.00791415	0.156452	-2.62155
C2CD5	0.465637	9.39637	2.67224	0.00875926	0.161325	-2.7072
LETMD1	0.465404	7.23846	2.67782	0.00862411	0.160447	-2.69409
OCEL1	0.464728	5.3136	2.38472	0.0189193	0.228241	-3.35027
SUDS3	0.464132	7.05882	2.44678	0.016105	0.212809	-3.2169
FAM13B	0.46348	7.4641	2.28501	0.0243598	0.261516	-3.55815
TMEM30B	0.462854	4.35479	3.60133	0.000488777	0.0456104	-0.217418
SALL2	0.462439	5.33969	2.12938	0.0356035	0.313206	-3.86662
FAM110B	0.462152	4.36167	2.73394	0.00736696	0.151805	-2.56096
NRIP1	0.462004	9.23623	2.0655	0.0413837	0.33309	-3.98751
TMEM128	0.461821	6.67369	2.9001	0.00455963	0.121642	-2.15301
FAM122B	0.461483	6.53059	3.46649	0.000770074	0.0550953	-0.61521
NUAK1	0.461416	7.95322	2.22501	0.0282592	0.283367	-3.6794
UBR7	0.460084	8.18562	2.29924	0.0235075	0.256206	-3.52897
STX18	0.458386	6.71513	3.16369	0.00204728	0.0889124	-1.46491
DYNLT3	0.457856	9.29913	3.07638	0.00268327	0.097922	-1.69827
TMEM101	0.457816	5.95412	2.18906	0.030848	0.294134	-3.75065
IRF2BPL	0.45716	11.6098	3.61647	0.000464116	0.0448004	-0.172018
LYPLA1	0.457158	9.03485	2.42347	0.017115	0.217656	-3.26735
RRM2B	0.457125	7.78546	2.57163	0.0115476	0.180825	-2.93949
LOC93622	0.457111	6.70471	2.65176	0.00927178	0.165254	-2.75512
STON2	0.456518	3.53314	3.72086	0.000323553	0.0408676	0.144838
FAAH	0.45543	5.46203	2.06421	0.0415082	0.333467	-3.98991
KLHDC2	0.455316	8.5448	2.43135	0.0167674	0.216047	-3.25034
TCEAL4	0.454202	10.8095	2.29066	0.024018	0.25907	-3.54658
PPAPDC1B	0.454128	6.71788	2.08276	0.0397466	0.327677	-3.95516
LOC100129550	0.453975	5.96161	2.57771	0.0113589	0.179757	-2.92568
BCAR3	0.452236	5.62399	2.11794	0.0365841	0.31787	-3.88852
LEAP2	0.451855	4.07649	2.39386	0.0184792	0.22523	-3.33082
LINC00472	0.45091	3.20242	2.0043	0.0476592	0.352951	-4.10015
SULF2	0.450903	5.72913	2.16814	0.0324477	0.300292	-3.79163
ARMCX1	0.450831	9.2135	1.99404	0.0487876	0.355874	-4.11873
IKBKB	0.450444	5.04456	3.41892	0.000901535	0.0599876	-0.752759
SLC22A18	0.449563	5.81049	2.0185	0.0461349	0.347063	-4.07429
LIN7A	0.449394	3.04516	2.79673	0.00615961	0.138406	-2.4092
MINOS1	0.448879	7.3689	3.62016	0.000458285	0.0446544	-0.160929
DPY19L3	0.448062	7.71872	2.55911	0.0119457	0.183424	-2.96786
CASP7	0.44742	7.05674	2.50825	0.0136918	0.197297	-3.08184
CDHR3	0.447115	2.60882	2.61826	0.0101687	0.171659	-2.83279
SIGIRR	0.446212	6.81698	2.14508	0.0342941	0.308603	-3.83638
YIPF1	0.446119	7.6618	3.07648	0.00268249	0.097922	-1.69802
XPA	0.445869	7.59322	2.70669	0.00795485	0.156452	-2.62589
MED13L	0.445544	6.49538	2.88041	0.00483124	0.124352	-2.20241
RASA1	0.444947	6.61888	2.16664	0.0325655	0.300702	-3.79456
NBL1	0.444946	6.55743	2.17465	0.0319422	0.297951	-3.77891
MKNK2	0.444536	10.1708	2.79939	0.00611263	0.137901	-2.40269
RAB11A	0.444303	7.67052	2.49174	0.0143059	0.20272	-3.11841
C14orf79	0.444052	5.81692	3.27006	0.0014622	0.0771124	-1.17345
WDR52	0.443842	4.05996	2.71149	0.00784829	0.15637	-2.61449
HAGH	0.443387	7.52014	2.41105	0.0176757	0.220853	-3.29405
FAR1	0.44285	4.83487	2.89317	0.00465362	0.122726	-2.17044
PSMA5	0.4425	7.17135	2.6265	0.00994097	0.170935	-2.81376
POLR3GL	0.441876	7.4719	2.45892	0.0156004	0.209775	-3.19047
STARD13	0.441345	3.34255	4.15988	6.60517e-05	0.020091	1.54887
PRRT2	0.44026	4.46251	2.06623	0.0413128	0.33309	-3.98613
APPL2	0.439509	3.94263	3.15391	0.00211078	0.089813	-1.4913
SPARC	0.439261	10.843	2.04605	0.0432959	0.338111	-4.02363
ATPAF1	0.439018	6.14174	2.73232	0.00740075	0.152195	-2.56484
CTBS	0.438736	6.00434	2.70825	0.00792017	0.156452	-2.6222
ABCC13	0.438659	2.80606	2.35752	0.0202844	0.2372	-3.40775
CDKN1B	0.438645	9.36944	2.08889	0.0391797	0.325892	-3.94363
CERS2	0.437542	9.19103	2.01187	0.0468421	0.349428	-4.08639
ETFDH	0.437201	4.93259	3.58729	0.000512741	0.0463586	-0.259374
CELSR3	0.436813	3.48548	2.00092	0.0480286	0.353813	-4.10628
GADD45G	0.436482	5.69318	2.58357	0.0111794	0.178432	-2.91233
DNM3OS	0.435821	3.59445	2.53326	0.0128062	0.190773	-3.02603
CIPC	0.4358	5.55945	2.13164	0.0354123	0.31233	-3.86228
AKR7A2	0.435707	8.40055	2.08117	0.0398956	0.328508	-3.95816
CELSR1	0.435415	3.94683	3.87153	0.000189975	0.0322043	0.613933
PAXIP1	0.435388	7.02799	2.78302	0.00640664	0.141004	-2.44258
ABCC8	0.435147	2.6377	3.72849	0.000315057	0.0402918	0.168243
ZNF542P	0.433643	4.85774	2.17129	0.0322023	0.298986	-3.78548
CCDC53	0.433588	6.25951	2.62456	0.00999411	0.171342	-2.81824
DGAT1	0.43331	6.69591	2.19749	0.0302232	0.291573	-3.73404
SLK	0.432744	8.20281	2.72391	0.00757851	0.153841	-2.58492
KIAA1467	0.432508	3.58447	3.62106	0.000456888	0.0446544	-0.15825
HTT	0.432323	5.94838	2.80781	0.0059663	0.136101	-2.3821
CPEB2	0.432241	5.05098	4.65074	9.84134e-06	0.00915334	3.24408
TMEM170B	0.431949	3.89693	2.3954	0.0184057	0.22498	-3.32752
FRAT1	0.431097	4.96432	2.48243	0.014663	0.204737	-3.13893
FAM221A	0.430533	4.36889	2.11502	0.036838	0.317916	-3.89408
PRDX3	0.429915	5.925	3.64989	0.000413801	0.0438809	-0.0713283
SPPL2A	0.429497	6.57964	3.13508	0.0022383	0.091968	-1.54195
CAPN13	0.429461	4.2438	2.43419	0.0166435	0.21568	-3.24419
UNC5A	0.42922	3.14855	2.42585	0.0170095	0.217371	-3.26223
ENTPD5	0.428798	4.09109	3.04894	0.00291823	0.101599	-1.77051
EFCAB7	0.428281	4.64936	2.67278	0.00874613	0.161228	-2.70594
MLH1	0.427994	7.62484	2.37775	0.0192613	0.230213	-3.36506
OLFML2A	0.427753	6.01983	2.29774	0.0235957	0.256543	-3.53204
ERO1LB	0.427296	4.38672	2.2384	0.0273439	0.27995	-3.65258
ZXDA	0.426795	5.5231	3.11181	0.00240583	0.0946692	-1.60422
SERPINB1	0.425907	6.02164	2.72937	0.0074627	0.153008	-2.57189
LOC101926967	0.425749	3.22283	3.02829	0.00310746	0.103834	-1.82452
LOC100507535	0.425576	3.68492	2.60208	0.0106294	0.174256	-2.87
VEZT	0.425564	6.33182	3.45018	0.000812968	0.0565815	-0.662539
SCP2	0.424811	10.3404	2.8202	0.00575688	0.134856	-2.35173
HEXIM1	0.424626	7.13615	3.408	0.000934537	0.0608997	-0.784107
MYRIP	0.424501	3.15356	4.07136	9.18239e-05	0.0229134	1.2568
MEAF6	0.424475	5.40709	3.83145	0.000219171	0.0353123	0.487835
MYOF	0.423801	6.71866	2.36629	0.0198353	0.234607	-3.38929
HS3ST2	0.423568	3.4165	2.2499	0.0265798	0.274981	-3.62946
TTC14	0.423484	6.03456	2.70716	0.00794436	0.156452	-2.62477
POC1B	0.423281	5.97674	2.54675	0.0123504	0.187334	-2.99573
TMEM167B	0.422633	8.08696	2.68251	0.00851199	0.160447	-2.68305
GLI3	0.422625	5.54494	2.7923	0.00623851	0.139443	-2.42001
SHQ1	0.421864	7.84541	3.14284	0.0021849	0.0906843	-1.5211
ZSWIM6	0.420854	6.42249	2.77884	0.00648368	0.142044	-2.45273
FAM69A	0.420396	4.49907	3.15007	0.00213626	0.0901391	-1.50166
TMEM263	0.419658	8.83769	2.0177	0.0462202	0.347172	-4.07576
PCLO	0.419004	4.11539	3.14572	0.00216543	0.0906843	-1.51338
LOC102724275	0.418502	3.89483	2.06377	0.0415501	0.333542	-3.99072
ASCL1	0.418332	2.83079	2.39642	0.0183574	0.224672	-3.32535
TRAK1	0.417857	5.29576	3.7475	0.000294777	0.0392489	0.226778
SLC44A1	0.417528	6.19051	3.53354	0.000615176	0.0498731	-0.418879
PARD6B	0.416117	4.24283	3.27122	0.00145678	0.0770246	-1.17023
ENOX1	0.41572	4.34265	2.942	0.00402761	0.114781	-2.04694
SLC25A35	0.41537	4.5263	3.64199	0.000425209	0.0438809	-0.0952011
KCND3	0.414442	3.08195	3.45197	0.000808155	0.0565815	-0.657355
CYB5R1	0.414254	4.44131	3.70897	0.000337239	0.0415697	0.108411
RWDD4	0.413406	7.0566	2.66139	0.00902738	0.163587	-2.73262
LCOR	0.412338	6.99442	3.05683	0.00284877	0.101377	-1.74979
DGKD	0.412227	6.71928	2.22462	0.0282856	0.283367	-3.68016
COPZ1	0.411655	8.4689	2.22728	0.0281018	0.283335	-3.67485
PRICKLE2	0.409865	5.47648	2.03129	0.0447977	0.342788	-4.05085
KIAA1279	0.409648	5.75708	2.17735	0.031735	0.297278	-3.77364
PDRG1	0.409406	7.10874	2.44087	0.0163557	0.214164	-3.22972
RPA3OS	0.409022	5.57434	2.83885	0.00545404	0.130868	-2.30574
UPRT	0.407769	4.67607	2.53644	0.0126975	0.189786	-3.01891
SPA17	0.406803	4.99148	2.00327	0.0477722	0.353106	-4.10203
HCAR3	0.406784	3.1333	1.98529	0.0497677	0.358699	-4.13451
PHF21B	0.406761	2.63635	2.43257	0.0167143	0.215848	-3.24771
CROT	0.406532	4.50166	3.29589	0.00134593	0.0742963	-1.10153
C9orf64	0.40648	8.52953	3.86362	0.000195424	0.0325104	0.588979
VPS39	0.40639	6.21013	2.81642	0.00582009	0.135023	-2.36101
PNPO	0.405685	6.02214	2.30923	0.0229248	0.252469	-3.50838
COL1A1	0.405664	7.35382	2.54369	0.0124524	0.187685	-3.00261
CORO2A	0.405595	4.40655	2.60736	0.010477	0.172888	-2.85788
UBXN10	0.404817	3.89881	3.66562	0.000391946	0.0438809	-0.0236848
CCDC28A	0.404525	6.32498	2.11337	0.0369816	0.318612	-3.89722
TNNI3K	0.404154	2.98715	3.51582	0.000652969	0.0507747	-0.47104
PEBP4	0.403609	2.62919	2.20639	0.0295749	0.28849	-3.71642
KLHDC1	0.403097	4.1822	4.55369	1.44831e-05	0.0105217	2.89919
CHAD	0.40291	2.96233	2.22319	0.0283852	0.283817	-3.68302
PLGRKT	0.402609	5.46446	2.06582	0.041353	0.33309	-3.98691
EFHD2	0.402222	6.63956	2.47159	0.0150887	0.206657	-3.16275
MOAP1	0.402036	8.90648	2.46161	0.0154902	0.209121	-3.18458
TPPP3	0.401896	3.53418	2.1194	0.0364577	0.317311	-3.88573
ERMARD	0.401647	6.43624	2.46607	0.0153096	0.207873	-3.17483
IFT88	0.400431	7.4117	2.58933	0.0110055	0.176836	-2.89918
TSPYL4	0.400271	8.10699	2.408	0.0178163	0.221082	-3.3006
MTL5	0.399449	3.42264	2.8961	0.00461366	0.122604	-2.16307
KIAA0040	0.398841	5.65138	2.33631	0.0214091	0.243498	-3.45218
CRYL1	0.398751	5.60841	2.08588	0.0394574	0.326345	-3.9493
PIGK	0.397187	4.76203	3.9563	0.000139957	0.0283544	0.883816
KDM4B	0.396903	5.67136	3.52586	0.000631296	0.050263	-0.441512
LOC158960	0.39675	6.65139	2.82346	0.00570289	0.134249	-2.34371
G6PC3	0.396352	5.73135	2.18688	0.0310115	0.295005	-3.75494
TMEM144	0.395659	3.13131	4.50245	1.77269e-05	0.0113353	2.71894
KIF5C	0.395059	3.85502	2.3406	0.0211774	0.242345	-3.44322
MYO6	0.394495	7.81259	2.14564	0.0342488	0.308603	-3.83531
YPEL5	0.393959	8.56667	2.84195	0.00540515	0.130559	-2.29808
MINPP1	0.39351	6.5217	2.1152	0.0368221	0.317916	-3.89374
THAP1	0.393246	4.84321	2.66782	0.00886772	0.1623	-2.71758
MEIS3	0.392794	4.64317	3.10067	0.00249007	0.0963172	-1.6339
RAP1B	0.390993	9.74793	2.80035	0.00609586	0.137675	-2.40036
ACOT4	0.390296	4.46211	2.04911	0.04299	0.33771	-4.01797
ECHDC2	0.389504	7.19603	2.07425	0.0405469	0.330545	-3.97114
LINC01420	0.389384	5.69094	2.8089	0.00594757	0.135977	-2.37943
SERINC3	0.38932	7.675	2.7917	0.00624912	0.139443	-2.42145
FBXO8	0.388826	6.69987	2.68442	0.00846692	0.160447	-2.67857
NXPE3	0.388775	3.66324	3.13129	0.00226484	0.0922831	-1.55213
TMEM9B	0.388588	6.41424	2.6075	0.010473	0.172888	-2.85757
NDFIP1	0.388307	7.4338	2.88974	0.00470071	0.123	-2.17903
BZRAP1	0.388083	4.92451	2.1132	0.0369964	0.318612	-3.89754
CX3CR1	0.387549	3.9687	2.23343	0.0276808	0.281651	-3.66256
TRERF1	0.387462	4.07015	3.73461	0.00030838	0.0399372	0.187084
TLE3	0.387445	5.94574	3.0122	0.00326272	0.104642	-1.8664
LOC101927204	0.385444	5.13996	2.9034	0.00451553	0.121087	-2.14471
MICAL2	0.384877	5.27957	2.58918	0.0110101	0.176836	-2.89954
PRLR	0.384449	4.59104	2.51441	0.0134686	0.195143	-3.06813
RAP2C	0.383788	7.74429	2.08503	0.0395357	0.326597	-3.95089
SLTM	0.383212	9.01533	2.66357	0.00897289	0.16333	-2.72751
CMBL	0.382623	7.68431	2.87959	0.00484292	0.124492	-2.20446
CHST15	0.38231	5.24942	3.22995	0.00166156	0.0811427	-1.28427
GAMT	0.382306	5.17392	1.99969	0.0481639	0.353965	-4.10852
ELOVL5	0.381866	5.61391	3.08073	0.00264767	0.0976189	-1.68677
TBK1	0.381545	7.49759	3.15239	0.00212087	0.0900356	-1.49542
PDCD6IP	0.380818	7.61641	2.51793	0.0133427	0.194125	-3.0603
RBBP7	0.380314	9.5457	2.54591	0.0123782	0.187478	-2.99761
CCDC92	0.380175	7.51805	2.48558	0.014541	0.20437	-3.13198
PARK7	0.379853	12.0594	3.04869	0.00292049	0.101599	-1.77118
EFHC1	0.379076	5.16911	2.41154	0.0176536	0.220853	-3.29301
ERLIN2	0.379028	5.28941	2.18804	0.0309245	0.294589	-3.75266
THBS1	0.378402	4.9876	2.43489	0.0166135	0.215428	-3.2427
AMT	0.378037	4.90091	2.00355	0.047741	0.353106	-4.10151
HSD17B4	0.377853	6.07132	3.99738	0.000120508	0.0262324	1.01613
SEC23IP	0.377547	4.92525	4.08747	8.65081e-05	0.0226939	1.30964
SLC25A46	0.376846	6.63843	1.99032	0.0492028	0.356699	-4.12546
ACADVL	0.376556	9.16023	2.54203	0.0125081	0.188066	-3.00634
ARF3	0.376112	7.33698	2.15853	0.0332063	0.304012	-3.81033
ZNF30	0.375975	4.90405	2.0656	0.0413735	0.33309	-3.98731
ECHS1	0.375573	10.034	2.63177	0.00979799	0.170192	-2.80157
FAM134B	0.375557	3.7942	2.71477	0.00777631	0.155834	-2.6067
EIF3H	0.374167	8.54406	2.12633	0.0358623	0.314807	-3.87246
KIAA1407	0.374143	3.22308	3.25309	0.00154366	0.0787577	-1.22047
COPRS	0.373444	7.80564	2.32369	0.0221042	0.247427	-3.47845
YPEL2	0.372865	5.5349	2.8257	0.00566604	0.133724	-2.3382
PRR13	0.37285	7.70773	3.09098	0.00256556	0.0970358	-1.65963
NICN1	0.372733	6.04132	2.52272	0.0131728	0.192947	-3.04959
ABCD3	0.372631	6.21569	3.322	0.00123721	0.0706581	-1.02834
CACFD1	0.371976	6.40526	3.26238	0.00149858	0.0780076	-1.19477
GOLGA2P5	0.371833	4.646	2.88244	0.00480263	0.124237	-2.19734
MUM1	0.371816	6.55568	3.36816	0.0010649	0.0662308	-0.897869
PINK1	0.371257	6.63335	2.91121	0.00441261	0.119749	-2.12501
ZMAT1	0.371037	4.2618	2.61474	0.0102673	0.172346	-2.8409
RETSAT	0.371012	7.23692	2.09315	0.0387893	0.324227	-3.93559
NDUFAF1	0.370953	6.47737	2.15407	0.0335636	0.305643	-3.81898
PIGV	0.370862	7.03892	2.50938	0.0136506	0.196943	-3.07933
AFF3	0.370808	3.24522	3.35612	0.00110755	0.0668517	-0.932054
COQ5	0.370503	7.24734	2.14613	0.0342083	0.308603	-3.83436
BNIP3L	0.370232	8.08665	2.35726	0.020298	0.2372	-3.4083
CISH	0.369567	4.42604	2.20767	0.0294827	0.287959	-3.71389
EFR3A	0.369452	8.71615	2.40589	0.0179138	0.221082	-3.30512
RPGR	0.368732	5.41456	2.54623	0.0123676	0.187456	-2.9969
RUNDC1	0.36855	5.60672	2.92211	0.00427253	0.117664	-2.09744
RAB2B	0.367573	6.52601	2.21774	0.0287664	0.284769	-3.69388
PEF1	0.367356	7.64471	2.20084	0.0299776	0.29085	-3.72741
FUCA1	0.366867	5.13798	2.95166	0.00391335	0.1131	-2.02231
RHBDD2	0.366723	4.6719	3.09164	0.00256028	0.0970358	-1.65786
CYB561D2	0.366274	4.41788	2.29705	0.0236369	0.256719	-3.53347
NBPF1	0.366069	7.43869	2.62663	0.00993751	0.170935	-2.81346
FUT8	0.365957	4.46709	2.4738	0.0150009	0.206363	-3.15789
IGDCC3	0.365636	3.18463	2.27383	0.0250483	0.265722	-3.58096
SLC25A20	0.365179	5.16709	2.41021	0.0177145	0.220913	-3.29586
KCNK3	0.365168	2.60718	2.06036	0.0418813	0.334113	-3.99707
RASEF	0.364991	7.62889	2.18176	0.0313984	0.296496	-3.76499
ADCY1	0.364783	2.9993	2.77793	0.00650061	0.142251	-2.45494
CHN2	0.364061	2.75067	4.02391	0.000109353	0.0245887	1.10209
SEC14L2	0.363882	3.25536	2.00301	0.0478009	0.353106	-4.1025
MCC	0.36384	4.33729	2.50005	0.0139934	0.200654	-3.10001
DNAJC16	0.363726	4.30592	3.5116	0.0006623	0.0507747	-0.483448
UBL3	0.363278	6.71749	2.63956	0.0095897	0.167724	-2.7835
QDPR	0.362998	5.00135	1.99721	0.0484366	0.354601	-4.113
PJA2	0.36267	7.64355	2.32393	0.0220907	0.247427	-3.47794
ATP8B1	0.361295	8.7176	2.19073	0.0307232	0.293895	-3.74736
MPP3	0.361169	3.79663	2.37987	0.0191564	0.229797	-3.36055
DLX2	0.361059	3.60289	2.20633	0.0295793	0.28849	-3.71654
NT5DC1	0.361	5.5808	2.59003	0.0109845	0.176836	-2.89758
KIAA0485	0.360923	5.90461	2.13662	0.0349942	0.310367	-3.8527
CDYL2	0.3609	3.94237	3.17473	0.00197772	0.087025	-1.43503
C1orf21	0.360817	4.66604	2.74313	0.00717765	0.150173	-2.53892
GLDN	0.360494	3.16085	2.51218	0.0135488	0.195993	-3.07309
H2AFJ	0.360151	7.75042	2.0375	0.0441609	0.340552	-4.03943
ZNF626	0.360089	5.03722	2.66359	0.0089725	0.16333	-2.72748
CPT2	0.359989	5.99889	2.68094	0.00854951	0.160447	-2.68676
CYB5D2	0.359942	2.87918	2.48346	0.014623	0.204737	-3.13666
NXF1	0.359918	6.8337	2.42399	0.0170919	0.217497	-3.26623
RNF139	0.359778	8.64282	2.06578	0.041356	0.33309	-3.98697
PLEKHA7	0.358802	4.10565	2.54963	0.0122551	0.18658	-2.98926
C14orf132	0.358111	4.05292	2.04313	0.04359	0.338368	-4.02904
NFIA	0.357799	5.61909	2.10665	0.0375747	0.319594	-3.91002
ATAD1	0.357504	5.57315	3.40886	0.000931907	0.0608997	-0.78165
TMBIM4	0.357416	8.44942	3.96916	0.000133567	0.0277222	0.925127
DMXL2	0.356797	3.974	3.23457	0.00163736	0.0805376	-1.27156
PPP2CA	0.356228	5.17149	3.66593	0.000391526	0.0438809	-0.0227433
TMEM63C	0.356084	2.78251	2.73822	0.00727826	0.151427	-2.55071
EPB41L5	0.354946	4.6522	2.30994	0.0228841	0.252292	-3.50692
LOC101927391	0.354347	2.82466	2.85436	0.00521347	0.129341	-2.26732
CETN3	0.353814	8.20857	2.11654	0.0367052	0.317916	-3.89118
DYNLL1-AS1	0.353575	3.97998	2.33921	0.0212522	0.242418	-3.44613
PGGT1B	0.353254	5.44999	3.51868	0.000646718	0.0507747	-0.462626
AMN1	0.352663	4.26006	2.20827	0.02944	0.287745	-3.71271
SIL1	0.352171	7.62605	2.08248	0.0397727	0.32776	-3.95569
CREBL2	0.35164	6.25457	2.78322	0.00640299	0.141004	-2.4421
KIF12	0.351429	2.98361	2.47917	0.0147898	0.205689	-3.1461
IL20RA	0.350903	3.22753	2.20042	0.030008	0.291007	-3.72824
GNPDA2	0.350899	3.11345	2.9451	0.00399063	0.114686	-2.03905
CETN2	0.349548	9.62758	2.00111	0.0480076	0.353813	-4.10593
HMGN2	0.349351	11.5841	2.36043	0.0201347	0.236372	-3.40164
WBP1L	0.34929	8.23712	2.73712	0.00730096	0.151427	-2.55334
ARX	0.349257	3.04019	2.09083	0.0390016	0.325276	-3.93997
LOC692247	0.348898	3.70378	2.83382	0.00553432	0.132294	-2.31818
PLA2G4C	0.348194	4.33671	2.76208	0.00680148	0.145192	-2.49331
PEBP1	0.347514	9.62351	2.23832	0.0273493	0.27995	-3.65274
AHSA2	0.347144	6.29599	2.18381	0.0312429	0.29568	-3.76097
CEP290	0.346553	6.45605	2.1356	0.0350792	0.310367	-3.85465
MLEC	0.346319	9.06245	2.4374	0.0165047	0.215015	-3.23725
WDR47	0.34627	7.1661	2.92348	0.00425532	0.117664	-2.09399
DNAJB14	0.346208	6.66243	2.8169	0.00581187	0.134989	-2.35981
COMMD3	0.346145	9.04277	2.29883	0.0235317	0.256206	-3.52981
ZNF84	0.34607	6.70784	2.69609	0.00819484	0.159394	-2.651
COQ6	0.345869	4.77805	2.38891	0.0187162	0.226878	-3.34135
SEPN1	0.345385	5.33077	2.28325	0.0244665	0.262274	-3.56173
MAP7D1	0.345056	6.60434	2.45527	0.0157506	0.210784	-3.19843
ACAA1	0.344654	7.48109	2.56625	0.0117172	0.182187	-2.9517
FLVCR1-AS1	0.344559	4.75862	2.02738	0.0452034	0.344276	-4.05804
SLC43A1	0.344008	3.34905	2.10415	0.037797	0.320592	-3.91476
TENC1	0.34354	5.01358	2.25457	0.0262741	0.27299	-3.62001
SLC38A1	0.343256	7.28483	2.15334	0.0336227	0.306044	-3.8204
IDNK	0.342719	4.6763	2.06809	0.0411339	0.332286	-3.98266
CCDC125	0.342713	4.70693	2.03253	0.0446698	0.342591	-4.04857
RAB27B	0.342314	4.63871	2.41221	0.0176226	0.220853	-3.29156
SMIM15	0.34216	8.38431	2.40723	0.0178515	0.221082	-3.30223
TNFRSF19	0.342071	3.22015	4.04233	0.000102197	0.023879	1.162
KLHL5	0.341841	5.0561	2.43349	0.016674	0.215692	-3.24571
DIS3L	0.341586	5.10619	2.34169	0.0211189	0.242228	-3.44095
GNPDA1	0.340848	7.47662	2.00638	0.0474334	0.352683	-4.09637
CDC42-IT1	0.340739	3.86613	2.49971	0.0140061	0.200695	-3.10076
MIS12	0.340188	6.80973	2.31957	0.0223351	0.248651	-3.48698
FAM114A1	0.340108	7.93555	2.17695	0.0317653	0.297278	-3.77441
ARL1	0.339929	7.50408	2.03971	0.0439357	0.339891	-4.03535
SRI	0.339413	6.89358	2.05547	0.0423603	0.33518	-4.00617
LINC00938	0.339312	4.10306	3.28249	0.00140515	0.0758632	-1.13891
CCDC153	0.338962	3.341	2.75847	0.00687167	0.146162	-2.50202
LOC400768	0.338915	2.59558	2.72181	0.00762356	0.154296	-2.58993
STXBP5	0.338662	3.64675	2.18281	0.0313189	0.29614	-3.76294
GRIK3	0.338526	2.82046	2.74663	0.00710669	0.149296	-2.53051
KITLG	0.33845	4.41238	3.42849	0.000873489	0.0586011	-0.725195
PVRL2	0.33801	5.14291	2.52217	0.0131924	0.192947	-3.05084
CBFA2T3	0.337673	4.17486	2.16773	0.0324795	0.30045	-3.79242
CDK17	0.337622	5.48307	4.30686	3.7858e-05	0.0158092	2.04329
SGSH	0.33758	6.72876	3.22547	0.0016853	0.0815591	-1.29656
PQLC3	0.337542	5.37429	2.409	0.0177701	0.221082	-3.29846
MGC24103	0.337197	4.78093	2.20232	0.0298699	0.290356	-3.72449
ZNF500	0.336945	5.65303	2.72881	0.00747451	0.153078	-2.57323
NFIC	0.335935	6.68908	2.01728	0.0462645	0.347172	-4.07652
DAAM2	0.335689	4.09509	2.01464	0.0465457	0.348488	-4.08134
STXBP3	0.335195	5.87254	3.40304	0.000949912	0.0616247	-0.79833
PARP11	0.334878	3.8118	4.04386	0.000101625	0.023879	1.16697
CCDC96	0.334872	2.69043	2.17321	0.0320534	0.298181	-3.78173
TCTN1	0.334803	5.11291	3.51576	0.000653105	0.0507747	-0.471222
TRAK2	0.334561	6.73253	1.99245	0.0489643	0.356026	-4.1216
ZNF738	0.334279	4.38616	2.594	0.0108665	0.175632	-2.88852
KHNYN	0.334217	6.75099	2.06672	0.0412656	0.333087	-3.98522
GNG10	0.333328	9.93682	2.37174	0.0195601	0.232562	-3.37776
MRFAP1	0.33324	12.757	2.73402	0.00736528	0.151805	-2.56077
MEGF10	0.333064	3.11844	2.22255	0.0284299	0.28391	-3.68431
ZNF44	0.331838	4.11446	3.1075	0.00243809	0.095025	-1.61571
LYPD6	0.33133	2.82205	2.65029	0.00930949	0.165254	-2.75854
KCNMA1	0.33127	3.83995	2.58329	0.011188	0.178432	-2.91297
ATP6V1G1	0.330904	7.79921	2.37863	0.0192175	0.230093	-3.36318
SLC35A3	0.329627	6.30813	2.07572	0.0404071	0.330412	-3.96838
LRRC17	0.329404	3.90558	2.05631	0.0422779	0.334917	-4.00461
LMAN2L	0.327781	7.7585	2.23792	0.0273766	0.27995	-3.65355
GLOD4	0.327404	8.19663	2.04257	0.043646	0.338418	-4.03007
ZNF385B	0.327036	3.34696	2.13775	0.0349004	0.310367	-3.85053
TMEM57	0.326551	5.45281	2.60995	0.0104029	0.172558	-2.85192
F8	0.326525	4.26481	2.22441	0.0283002	0.283367	-3.68058
NAIP	0.325377	4.57838	2.03154	0.0447723	0.342788	-4.0504
STARD5	0.325061	2.83994	3.43172	0.000864234	0.0581709	-0.715903
TTC39A	0.322631	3.80038	2.81167	0.00590039	0.135702	-2.37266
C6orf120	0.322069	6.89505	1.99143	0.0490786	0.356284	-4.12345
SPATA7	0.322021	3.10224	3.09447	0.00253811	0.0968327	-1.65037
CRIPAK	0.32199	5.16669	2.24459	0.0269301	0.276767	-3.64014
RBM47	0.32181	4.8458	4.02601	0.000108514	0.0245887	1.1089
CENPC	0.320491	4.64746	2.2144	0.0290025	0.286	-3.70053
IVD	0.319911	5.07147	2.76349	0.0067742	0.144954	-2.48991
BCAS3	0.319604	4.37552	2.35352	0.0204928	0.23796	-3.41617
IGBP1	0.31958	7.90544	2.26618	0.0255292	0.268437	-3.59651
TXLNB	0.319555	3.31028	2.21965	0.0286326	0.28427	-3.69009
CASC1	0.318749	2.6019	2.96475	0.00376332	0.110639	-1.98883
LEF1	0.318166	3.67089	2.5899	0.0109886	0.176836	-2.89789
EXOC8	0.316962	7.17039	2.09955	0.0382092	0.321611	-3.92348
CLASP2	0.316771	4.03259	3.83469	0.000216663	0.0353123	0.497982
TMED10	0.316279	7.5328	2.42766	0.0169295	0.217091	-3.25832
LOC100506100	0.316257	3.15031	2.75154	0.00700846	0.147995	-2.51872
PIP5K1C	0.313028	7.07141	2.3622	0.0200439	0.236083	-3.39791
ZNF493	0.312398	5.0017	2.84886	0.00529773	0.130013	-2.28098
TTC12	0.312244	3.77148	2.98747	0.00351536	0.107923	-1.9304
PPM1H	0.312095	4.68149	2.21186	0.0291831	0.286998	-3.70558
ZMYND8	0.311073	5.48146	2.40993	0.0177274	0.220913	-3.29646
MN1	0.310846	3.59094	2.13013	0.0355395	0.312913	-3.86517
ATPIF1	0.310834	8.16366	2.38498	0.0189064	0.228241	-3.3497
TMEM185A	0.310318	4.48511	2.01508	0.0464982	0.348293	-4.08053
SOCS2	0.310271	3.64474	2.1211	0.0363109	0.316977	-3.88248
CS	0.309625	8.20149	2.107	0.0375431	0.319594	-3.90934
TMEM106B	0.309615	6.42557	3.12466	0.00231196	0.0927057	-1.56989
CCDC159	0.309234	5.05195	2.35682	0.0203207	0.237234	-3.40922
LAMTOR3	0.309129	6.11591	2.19639	0.0303038	0.292053	-3.7362
DPEP2	0.30898	2.62845	2.13843	0.0348439	0.310259	-3.84922
ELOF1	0.30856	7.35612	2.37824	0.0192371	0.230193	-3.36402
FLJ35934	0.308099	4.95373	2.16572	0.0326371	0.300921	-3.79634
BZW1	0.307931	9.41524	2.02513	0.0454375	0.344704	-4.06215
NUDT12	0.307737	3.79151	2.61158	0.0103566	0.172558	-2.84818
LGALS8	0.307558	6.41815	2.07756	0.0402338	0.330225	-3.96493
C1orf123	0.307485	7.6543	2.45747	0.0156599	0.210258	-3.19363
ZNF587	0.306644	6.83484	2.03724	0.0441875	0.340552	-4.03991
ERP29	0.306339	9.31317	1.98457	0.0498489	0.358913	-4.13581
EIF4E3	0.306254	4.19305	2.83876	0.00545548	0.130868	-2.30597
CNIH3	0.306084	3.62702	3.29465	0.0013513	0.0742963	-1.10498
R3HDM4	0.305866	6.67117	2.0531	0.0425946	0.336644	-4.01058
HADHB	0.305556	9.51366	2.64791	0.00937111	0.165875	-2.76409
SLC20A1	0.305125	7.6945	2.07858	0.040138	0.329874	-3.96302
TRIQK	0.305008	4.82194	2.62113	0.0100888	0.171465	-2.82616
NUDT6	0.304873	4.41133	1.99926	0.0482113	0.353965	-4.1093
SLC30A9	0.304699	6.15341	2.34854	0.020754	0.238897	-3.4266
SLC22A5	0.303922	3.30856	2.96794	0.00372759	0.110388	-1.98065
2019-03-05	0.303668	5.96192	2.39665	0.0183465	0.224672	-3.32486
ATG14	0.303587	6.48937	2.71014	0.00787812	0.156452	-2.6177
CASD1	0.303309	3.48111	2.91979	0.00430206	0.118159	-2.10333
CARKD	0.303301	8.46447	1.98632	0.0496511	0.358468	-4.13265
PPM1E	0.303266	2.58172	2.04444	0.0434582	0.338246	-4.02662
NR2E3	0.303185	2.78355	2.90253	0.00452702	0.121087	-2.14688
MICU2	0.302198	9.07143	2.46101	0.0155148	0.209134	-3.1859
TNFRSF14	0.302099	6.97759	2.31326	0.0226931	0.25077	-3.50004
PPP6C	0.301954	7.25104	2.28353	0.0244498	0.262274	-3.56117
BLVRA	0.301652	5.9541	2.61789	0.0101791	0.171659	-2.83365
CCP110	0.301578	4.8146	3.2181	0.00172511	0.0823727	-1.31678
SREBF1	0.301404	5.36482	2.33219	0.0216337	0.244839	-3.46076
ZFYVE16	0.301144	4.85712	3.30201	0.00131967	0.0741412	-1.08441
TMED8	0.30101	5.23108	2.53956	0.0125916	0.188755	-3.01191
RPS27L	0.300668	7.47045	2.12479	0.0359939	0.315421	-3.87541
CD63	0.299905	12.0405	2.00444	0.047644	0.352951	-4.09989
INTU	0.299806	3.87735	2.15635	0.0333807	0.304876	-3.81456
RNF103	0.299731	5.8421	3.57197	0.000540164	0.0476416	-0.305027
WDR78	0.299663	2.93136	4.05142	9.88358e-05	0.023879	1.19162
FKTN	0.299338	4.45241	2.19794	0.0301898	0.291527	-3.73314
ZNF281	0.299122	8.25402	2.05791	0.0421214	0.334873	-4.00165
KIAA1958	0.298765	3.67386	3.22095	0.00170965	0.0823128	-1.30899
WDR19	0.298372	3.69244	4.78285	5.77231e-06	0.00706017	3.72085
CHMP4B	0.298326	6.14747	2.85265	0.00523964	0.129485	-2.27159
BCL2	0.298252	4.35552	3.12576	0.0023041	0.0927057	-1.56695
JADE2	0.298087	4.93497	2.55656	0.0120281	0.184221	-2.97362
CDK5RAP3	0.298052	8.59683	2.00653	0.0474178	0.352683	-4.09611
FCHO2	0.297905	5.55945	2.51053	0.0136088	0.196516	-3.07677
RBMXL1	0.297588	4.48251	2.18617	0.0310651	0.295104	-3.75634
TTC1	0.297131	6.4937	2.05724	0.0421863	0.334873	-4.00288
GNG12	0.296991	5.99525	2.02817	0.0451212	0.344246	-4.05658
GOLGB1	0.296658	7.36744	2.30328	0.0232701	0.255125	-3.52065
SETD1B	0.296634	8.9994	2.888	0.00472484	0.123	-2.1834
LCORL	0.296555	4.76509	2.88757	0.00473077	0.123	-2.18447
PEX11A	0.296266	5.11594	2.84523	0.00535397	0.13042	-2.28998
PNRC2	0.295638	8.50581	2.47387	0.014998	0.206363	-3.15773
ARL15	0.294853	5.21689	2.37713	0.0192917	0.230308	-3.36636
SNAP29	0.294435	5.33835	2.39911	0.0182305	0.223775	-3.31962
PRKAR1A	0.294039	7.41996	2.04908	0.0429936	0.33771	-4.01803
LEO1	0.293818	6.35034	2.05895	0.0420191	0.334551	-3.9997
ZBTB1	0.293763	5.38511	2.11678	0.0366845	0.317916	-3.89072
LOC101928762	0.293577	4.87088	2.65903	0.00908687	0.163845	-2.73815
GRTP1	0.293183	4.6877	2.0727	0.0406938	0.330545	-3.97404
ALAD	0.293008	5.51281	2.46143	0.0154976	0.209121	-3.18497
TRIM66	0.292861	3.44053	3.19167	0.00187522	0.0851612	-1.389
FRY	0.292826	3.71972	2.3616	0.0200745	0.236083	-3.39917
FBXO21	0.292783	5.51518	2.58341	0.0111841	0.178432	-2.91268
CUL3	0.29205	5.7508	2.67658	0.00865401	0.160688	-2.69701
UBP1	0.291377	8.9071	2.40759	0.017835	0.221082	-3.30147
ZNF516	0.290608	4.11656	2.17467	0.0319408	0.297951	-3.77888
PHLDB2	0.290468	4.22748	2.25845	0.0260234	0.271541	-3.61218
SLC30A1	0.289693	4.33267	2.80592	0.00599886	0.136416	-2.38673
HNRNPA0	0.289445	7.36056	2.18742	0.0309705	0.294753	-3.75387
ZDHHC17	0.289281	4.98175	2.97803	0.00361656	0.109296	-1.95474
GRIPAP1	0.289065	4.73559	2.49439	0.0142055	0.202393	-3.11254
SLC25A14	0.288503	4.99111	3.94379	0.000146447	0.0288134	0.843748
JMJD8	0.287998	7.13117	2.69829	0.00814455	0.158718	-2.6458
ATXN10	0.28728	6.79321	2.03586	0.0443288	0.340742	-4.04245
ULK1	0.286848	3.56414	2.5069	0.0137408	0.197863	-3.08482
KIAA0753	0.286476	5.21596	2.52494	0.0130951	0.192947	-3.04466
ALDH6A1	0.285232	4.70136	2.34064	0.0211752	0.242345	-3.44314
TBC1D12	0.285068	4.42903	2.98202	0.00357343	0.108663	-1.94445
ZFC3H1	0.284433	4.49796	2.81126	0.00590736	0.135702	-2.37367
FAH	0.283893	4.7337	2.35121	0.0206137	0.238169	-3.42101
SLC35E3	0.283877	4.98662	3.38467	0.00100893	0.0639156	-0.850853
BCAS4	0.283727	4.28295	2.11601	0.0367519	0.317916	-3.8922
CYP4V2	0.283489	3.71662	2.98587	0.00353237	0.107923	-1.93454
SYTL5	0.283067	2.97741	2.04072	0.0438335	0.33954	-4.03349
THAP10	0.283057	3.41105	2.1244	0.0360275	0.31558	-3.87616
TMEM219	0.282991	5.95878	2.48177	0.0146884	0.204877	-3.14038
DYNC1I2	0.282895	6.2514	2.62116	0.010088	0.171465	-2.8261
GDPGP1	0.282823	2.57889	3.63093	0.00044167	0.0442561	-0.128532
NAV3	0.282482	2.63264	3.47322	0.000753026	0.0544467	-0.595656
GPR39	0.282451	3.99457	2.16987	0.032313	0.299723	-3.78826
EIF3A	0.282409	8.5286	2.14069	0.0346563	0.309127	-3.84487
MBD6	0.282384	4.53922	3.04489	0.00295447	0.101604	-1.78113
STRADB	0.282149	6.21865	2.06287	0.0416378	0.333853	-3.99241
TSPYL1	0.281938	5.09976	2.99576	0.00342879	0.106788	-1.90901
ME3	0.281721	4.2886	2.7641	0.00676231	0.14489	-2.48842
H2AFV	0.281674	7.48378	2.19443	0.0304486	0.293057	-3.74007
EXOC6	0.281106	3.76407	3.96524	0.000135482	0.0277222	0.912545
PIAS1	0.28102	6.14257	2.18394	0.0312331	0.29568	-3.76071
LZTFL1	0.280962	3.92446	3.16597	0.00203271	0.0884964	-1.45873
SLC25A3	0.280408	9.61964	2.51966	0.0132811	0.19356	-3.05643
GSDMD	0.280262	7.09764	2.07308	0.0406576	0.330545	-3.97333
GNPTG	0.279892	7.02223	2.06556	0.041378	0.33309	-3.9874
ZBTB2	0.279497	6.44269	2.12062	0.036352	0.317065	-3.88339
DZIP3	0.27936	4.6154	2.55861	0.0119616	0.183424	-2.96898
CNNM3	0.279281	4.78062	2.10746	0.0375022	0.319568	-3.90847
IGSF22	0.279264	3.90043	2.09271	0.0388293	0.324428	-3.93642
TMEM19	0.27907	3.94211	2.77338	0.00658559	0.142989	-2.46596
MR1	0.278934	4.32417	2.35133	0.0206074	0.238169	-3.42076
UBE2K	0.27888	7.71084	2.07542	0.0404356	0.330412	-3.96894
AKIP1	0.278822	5.06856	2.38569	0.0188722	0.228229	-3.34821
TP53INP1	0.278358	4.58937	3.51383	0.000657351	0.0507747	-0.476889
RSBN1	0.277746	6.53671	2.12538	0.0359434	0.315382	-3.87428
TXNDC15	0.276759	8.08834	2.45884	0.0156034	0.209775	-3.19063
RELL1	0.276201	6.1165	2.69993	0.00810721	0.158292	-2.64192
RNF4	0.275981	8.50522	2.03979	0.0439284	0.339891	-4.03521
REEP3	0.275899	5.96562	3.0923	0.00255513	0.0970358	-1.65613
GNS	0.275894	6.25916	2.32384	0.0220957	0.247427	-3.47813
NAPB	0.275186	4.14846	2.89045	0.00469088	0.123	-2.17724
LMBRD2	0.274525	3.93211	3.68462	0.000367001	0.0438809	0.0340789
NANOG	0.274315	3.39977	2.66492	0.0089393	0.163172	-2.72435
TIGD6	0.27418	3.30099	2.60526	0.0105372	0.173192	-2.86269
DAZAP2	0.273941	7.3557	3.81908	0.000229016	0.0355009	0.449097
RIPK3	0.273935	3.04961	2.16705	0.0325332	0.300675	-3.79376
MAP2K4	0.273626	5.21844	2.02077	0.0458956	0.346154	-4.07015
TMEM33	0.273563	6.73187	2.2508	0.0265205	0.274627	-3.62763
MADD	0.27336	6.15123	2.99886	0.00339686	0.106064	-1.90098
DOK1	0.272814	4.84774	2.93648	0.00409429	0.115237	-2.06099
ZC3H7A	0.272702	6.18517	2.04538	0.0433637	0.338111	-4.02488
HNRNPK	0.27269	10.6953	2.42642	0.0169842	0.217343	-3.26099
CRY1	0.272663	7.62412	2.15516	0.0334766	0.305258	-3.81688
FAM63A	0.272428	8.48653	2.13166	0.0354107	0.31233	-3.86224
DENND2D	0.27228	5.65898	2.03091	0.044837	0.342846	-4.05155
ERICH3	0.271707	2.52228	2.17897	0.0316107	0.297214	-3.77046
SLC25A45	0.271627	4.08827	2.20478	0.0296911	0.289166	-3.71961
SERGEF	0.271389	3.90853	3.04309	0.00297073	0.10173	-1.78584
TADA2B	0.271326	6.43871	2.17675	0.0317809	0.297278	-3.77481
STH	0.271016	2.73298	2.60928	0.010422	0.172558	-2.85346
CAMTA2	0.270774	5.39084	2.1864	0.0310473	0.295072	-3.75587
VAMP3	0.270771	6.74005	2.11711	0.0366562	0.317916	-3.8901
LOC100506730	0.270256	2.8407	2.91166	0.00440666	0.119747	-2.12386
NAGS	0.269474	2.71389	2.77188	0.00661388	0.142989	-2.4696
LOC646762	0.269324	3.42546	2.68123	0.00854246	0.160447	-2.68606
TGFB3	0.269298	3.33215	2.77259	0.00660051	0.142989	-2.46788
ITFG3	0.269078	6.78239	2.23857	0.0273326	0.27995	-3.65224
2019-09-08	0.268821	5.32627	3.14029	0.00220232	0.0909474	-1.52796
KANSL1	0.268795	8.0619	2.04718	0.0431829	0.338111	-4.02154
C16orf93	0.268644	5.12702	2.11057	0.0372279	0.319099	-3.90256
KLHL3	0.268498	3.52983	3.09152	0.00256126	0.0970358	-1.65819
AAGAB	0.268408	4.32658	3.6931	0.000356363	0.0434042	0.0599261
AHCYL1	0.26759	6.87985	2.87139	0.00496057	0.126085	-2.22494
RNF10	0.267518	6.89116	2.11571	0.0367773	0.317916	-3.89276
LNX2	0.267504	7.50154	2.00509	0.0475736	0.352951	-4.09872
SETD7	0.267429	5.33754	2.8169	0.00581202	0.134989	-2.35983
MTFR1L	0.266889	6.25503	2.32868	0.0218269	0.245942	-3.46807
ISCU	0.266643	9.98598	2.04676	0.0432248	0.338111	-4.02232
SERPINB6	0.266563	4.75061	3.27781	0.00142636	0.0760058	-1.15192
TTC18	0.266301	3.35913	2.41643	0.0174307	0.219576	-3.28249
RAB5B	0.266018	6.05474	2.14786	0.0340672	0.308307	-3.83102
SGPL1	0.265587	5.7678	2.13623	0.0350266	0.310367	-3.85344
SLC4A7	0.26535	4.92467	2.51206	0.0135534	0.195993	-3.07337
ARSD	0.264704	5.86865	1.99664	0.0485002	0.35494	-4.11404
SNX1	0.26305	5.60536	2.00432	0.0476578	0.352951	-4.10012
SUOX	0.262783	4.9096	2.43558	0.0165836	0.215344	-3.2412
CPEB3	0.262493	3.24001	4.43424	2.31495e-05	0.0121458	2.48109
DFNB31	0.262451	3.51768	2.41938	0.0172978	0.219027	-3.27615
NMNAT3	0.262329	4.34724	2.67317	0.00873659	0.161198	-2.70502
SESN2	0.261366	5.09353	2.80213	0.00606466	0.137122	-2.396
C1QTNF3	0.261038	4.34681	2.61384	0.0102927	0.172558	-2.84298
SEL1L	0.260582	4.86738	2.45555	0.0157391	0.210784	-3.19782
NFE2L1	0.260555	8.20012	2.43121	0.0167734	0.216047	-3.25064
GALC	0.260194	4.82172	2.35311	0.0205142	0.23796	-3.41703
CAPN7	0.260065	5.3405	2.15454	0.0335259	0.305435	-3.81807
PAWR	0.259984	4.87373	2.24513	0.0268945	0.276679	-3.63906
CXorf23	0.259302	3.8473	2.26729	0.0254586	0.268246	-3.59425
KLHL28	0.258724	5.59383	3.0507	0.00290261	0.101599	-1.76589
SMPDL3A	0.258517	3.54711	2.71505	0.00777023	0.155834	-2.60604
ITPK1-AS1	0.258153	3.32386	3.44283	0.000833022	0.0569817	-0.683807
MOCS2	0.256483	3.48022	2.38154	0.0190747	0.229322	-3.35702
CCDC170	0.256282	3.19509	2.62287	0.0100408	0.171465	-2.82216
PACRGL	0.255964	3.11274	3.6692	0.000387133	0.0438809	-0.0128347
ZNF563	0.255454	3.08886	2.62108	0.0100902	0.171465	-2.82628
ERAP2	0.254822	3.31698	2.04694	0.0432071	0.338111	-4.02199
FBXL2	0.254779	5.11252	2.19769	0.0302082	0.291566	-3.73364
LMBRD1	0.254424	4.61529	2.09641	0.0384927	0.32267	-3.92942
ULK2	0.254373	3.99801	2.00244	0.0478626	0.353306	-4.10353
PCBP2	0.254304	6.92243	2.69508	0.00821815	0.159499	-2.6534
MTX3	0.254065	4.60002	2.37528	0.0193834	0.231133	-3.37028
RAB11FIP4	0.253772	3.8802	2.41494	0.0174984	0.219934	-3.2857
CACNA2D1	0.253199	3.46007	2.29584	0.0237083	0.256889	-3.53594
FAM73A	0.253063	5.01738	2.89052	0.00468997	0.123	-2.17708
SLC30A7	0.252894	5.69799	2.57571	0.0114206	0.179807	-2.93022
LIAS	0.25231	3.39227	2.09004	0.0390742	0.325401	-3.94147
ACADS	0.251809	4.75339	2.60374	0.0105811	0.17375	-2.86618
SEC62	0.251385	7.67873	2.26636	0.0255178	0.268437	-3.59615
C5orf15	0.251058	6.0913	3.14344	0.00218086	0.0906843	-1.51951
HTR7P1	0.250571	2.71964	2.3203	0.0222939	0.248328	-3.48547
TM2D1	0.250264	4.97217	2.82961	0.00560213	0.133098	-2.32855
TULP4	0.249551	4.84165	2.47244	0.0150548	0.206363	-3.16087
NEIL2	0.249436	3.99073	2.45844	0.0156198	0.209857	-3.1915
SNRNP70	0.249411	5.06095	2.45444	0.0157848	0.210966	-3.20023
USP33	0.249295	6.58473	3.08048	0.00264969	0.0976189	-1.68743
ANKRD10	0.249017	5.36523	2.34625	0.0208755	0.23984	-3.43141
SPATA2	0.248956	4.03149	2.55228	0.0121677	0.185665	-2.98327
PBLD	0.248779	4.34624	2.44575	0.0161483	0.212809	-3.21914
GDPD1	0.248724	3.44543	2.36988	0.0196536	0.233403	-3.3817
DHFRL1	0.248461	5.68819	2.43993	0.0163961	0.214346	-3.23177
HCFC2	0.248196	4.84635	2.98878	0.00350156	0.107872	-1.92703
ATP6V0A1	0.247327	4.01726	3.78071	0.000262304	0.0377077	0.329526
MPP7	0.247047	3.97984	2.40872	0.0177828	0.221082	-3.29904
S100PBP	0.246863	6.04968	2.18406	0.0312242	0.29568	-3.76048
AGPAT6	0.246567	4.40789	2.35612	0.0203571	0.237348	-3.41069
ERMAP	0.246562	2.86485	2.91433	0.00437206	0.118964	-2.11713
KIAA1107	0.246346	3.71386	2.78253	0.00641554	0.141004	-2.44376
CTDSP2	0.24595	6.74074	2.11417	0.0369115	0.318148	-3.89569
C10orf88	0.245746	4.09977	2.52745	0.0130074	0.192449	-3.03905
MKL2	0.245466	4.68665	2.35175	0.0205855	0.238112	-3.41989
AIG1	0.24342	5.03526	2.42399	0.0170917	0.217497	-3.26622
FAM208A	0.24341	5.87496	2.90438	0.00450248	0.121087	-2.14224
ATP6V0C	0.243392	5.54382	2.09823	0.0383283	0.322084	-3.92599
LRRFIP1	0.242947	6.82762	2.64164	0.00953481	0.167469	-2.77867
IGIP	0.242827	4.99603	2.32146	0.0222291	0.247884	-3.48308
BECN1	0.242802	5.82531	2.38974	0.0186762	0.226528	-3.33958
R3HDM2	0.242794	7.11483	2.39064	0.0186332	0.226275	-3.33768
ERAP1	0.242001	4.10844	2.785	0.00637038	0.140848	-2.43777
PPM1A	0.241691	5.80243	2.16093	0.0330159	0.302946	-3.80568
SMARCC2	0.241493	4.98983	3.21996	0.00171501	0.0823727	-1.3117
ZNF18	0.241359	5.13674	2.48973	0.0143821	0.2031	-3.12283
TMEM62	0.241122	4.65471	2.92847	0.0041928	0.117044	-2.08133
DNAJC14	0.240949	4.2421	2.50568	0.0137856	0.198369	-3.08753
H2AFY	0.24034	7.09815	2.62586	0.00995867	0.171095	-2.81525
SAR1B	0.240133	5.24155	2.10387	0.0378217	0.320592	-3.91529
BUB3	0.24	6.64368	2.36341	0.0199816	0.235895	-3.39535
FITM2	0.239655	3.97475	2.36136	0.0200865	0.236083	-3.39967
GCC2	0.239509	4.3609	2.3795	0.019175	0.229797	-3.36135
ZNF100	0.239173	3.34307	2.29143	0.0239718	0.258709	-3.545
SRR	0.238965	3.44542	2.74314	0.00717743	0.150173	-2.5389
LCMT2	0.23886	4.58874	2.91742	0.00433228	0.118512	-2.10931
GAK	0.238639	8.44922	2.1214	0.0362845	0.316977	-3.88189
TMTC2	0.238456	3.69895	2.58494	0.0111378	0.178048	-2.9092
C2orf50	0.238123	2.53218	1.99403	0.0487888	0.355874	-4.11875
CBX4	0.237993	5.7345	2.3797	0.0191648	0.229797	-3.36091
FAM222A	0.23783	3.02599	2.18657	0.0310343	0.295072	-3.75554
RNFT1	0.237263	4.10787	2.20166	0.0299177	0.290544	-3.72579
CAMLG	0.237009	9.88953	2.10327	0.0378755	0.320824	-3.91643
FAM111A	0.236662	4.83342	2.44177	0.0163175	0.214032	-3.22779
C16orf46	0.236483	3.88542	3.36225	0.00108565	0.0667104	-0.914669
PPIP5K1	0.236265	4.30979	2.33441	0.0215124	0.244141	-3.45614
TMEM59	0.235946	6.33255	2.17848	0.0316485	0.297214	-3.77142
NEDD1	0.235758	5.72812	2.08813	0.0392491	0.32596	-3.94505
TACC1	0.235093	4.25578	2.02515	0.0454359	0.344704	-4.06212
ZNF585B	0.234972	3.69012	3.54921	0.000583473	0.0493348	-0.372569
SH3D19	0.23491	4.24726	2.22073	0.028557	0.284209	-3.68794
LAMP1	0.234812	8.30586	2.07713	0.0402745	0.330225	-3.96574
RNASEL	0.23409	4.69756	2.14498	0.0343022	0.308603	-3.83657
PTGER2	0.231484	3.08942	2.13431	0.0351875	0.31075	-3.85714
PPP1R3E	0.231381	4.03736	2.04319	0.0435835	0.338368	-4.02892
ANKS1B	0.230831	3.20491	2.62082	0.0100975	0.171465	-2.82689
DYX1C1	0.230774	3.61625	2.09381	0.0387291	0.323988	-3.93434
MKNK1	0.230738	4.98964	2.34846	0.0207585	0.238897	-3.42678
AGTRAP	0.230103	5.05322	2.22899	0.0279841	0.28304	-3.67144
2019-03-08	0.229884	4.37454	2.94521	0.00398935	0.114686	-2.03877
PRKAB1	0.22948	4.14896	2.59669	0.0107868	0.175207	-2.88234
BTF3	0.229191	9.28808	2.01946	0.0460336	0.346683	-4.07253
TRAF3IP1	0.229012	4.94	2.79569	0.00617809	0.138612	-2.41174
HSPA12A	0.228937	3.09367	3.29083	0.00136802	0.0745084	-1.11566
CASQ2	0.228914	2.77355	2.04943	0.0429584	0.337693	-4.01738
ZNF236	0.228688	4.62238	2.39553	0.0183996	0.22498	-3.32725
SEPSECS	0.228684	3.16848	4.00806	0.000115892	0.0254988	1.05068
IFT81	0.228238	4.3053	2.86415	0.00506676	0.12721	-2.243
HHEX	0.22814	2.8577	2.42116	0.017218	0.218693	-3.27232
DCAF11	0.227317	4.72572	2.85396	0.00521969	0.129341	-2.26834
C9orf156	0.226667	4.31202	3.56023	0.000562103	0.0485306	-0.339897
SLC46A1	0.226137	3.36649	2.62442	0.00999814	0.171342	-2.81858
C4orf29	0.226025	4.96422	3.00803	0.00330416	0.104936	-1.87723
TMEM245	0.2256	5.45321	2.44067	0.0163645	0.214164	-3.23017
LRIG1	0.225327	3.70708	3.34729	0.0011398	0.0677984	-0.95703
LIN52	0.225243	4.42123	2.33644	0.0214022	0.243498	-3.45191
LMLN	0.225146	3.64021	2.83638	0.00549327	0.131544	-2.31185
BCL9	0.224916	2.90055	2.1435	0.0344242	0.308722	-3.83944
PEX5L	0.224063	2.47689	1.98907	0.0493418	0.356789	-4.1277
TMEM135	0.223636	4.58562	2.36813	0.0197422	0.233892	-3.38541
ATG2B	0.223612	4.42533	2.59241	0.0109136	0.176254	-2.89215
ATP6AP2	0.222511	6.91948	2.33047	0.0217286	0.245407	-3.46436
TIAL1	0.222508	5.85853	2.8328	0.00555074	0.132531	-2.3207
VPS37C	0.2224	7.26584	2.09073	0.0390102	0.325276	-3.94015
FAM114A2	0.222221	5.39922	2.41613	0.0174445	0.219576	-3.28315
USP40	0.221691	5.28563	2.10971	0.0373033	0.319105	-3.90419
ZNF664	0.220386	4.37278	3.39858	0.000963936	0.0620253	-0.811103
INADL	0.220286	4.16229	2.10216	0.0379747	0.321121	-3.91854
AP3M2	0.220189	5.25788	1.99825	0.0483227	0.354433	-4.11113
TRAFD1	0.220055	4.85612	2.35323	0.0205076	0.23796	-3.41676
SNX24	0.220014	3.45874	3.41443	0.000914964	0.0603935	-0.765652
RAB21	0.21986	5.06874	3.13174	0.00226169	0.0922831	-1.55092
ADCY9	0.218874	4.22236	2.49537	0.0141686	0.202062	-3.11037
ZC3H13	0.218696	5.58994	2.24037	0.0272119	0.279103	-3.64863
TRMT10A	0.21849	3.57755	2.52486	0.0130979	0.192947	-3.04483
ZNF264	0.218035	4.63982	2.09803	0.0383462	0.322102	-3.92636
FSD1L	0.217942	3.05713	2.29598	0.0236999	0.256889	-3.53565
C11orf58	0.217875	6.55672	2.97393	0.00366121	0.110079	-1.96525
RNF34	0.217268	4.94173	2.56413	0.0117844	0.182522	-2.95648
TLR3	0.216957	3.26588	2.02842	0.0450955	0.344179	-4.05613
PTGER3	0.216321	3.31447	2.42861	0.0168877	0.216922	-3.25627
BAIAP3	0.216199	4.14492	2.1611	0.0330021	0.302946	-3.80534
MAP3K12	0.215472	4.42104	2.68724	0.00840032	0.1601	-2.6719
PCGF5	0.215322	4.35376	2.70751	0.0079366	0.156452	-2.62395
WDR7	0.215072	4.26818	2.36793	0.019752	0.233892	-3.38582
ARID1A	0.214893	4.94326	2.60856	0.0104426	0.172737	-2.85512
TMEM192	0.214654	3.30703	2.18167	0.0314052	0.296496	-3.76517
NEK11	0.214572	3.68128	2.50487	0.0138152	0.198656	-3.08932
MFSD7	0.214515	2.97343	2.47764	0.0148494	0.205999	-3.14945
WDR17	0.214452	2.52656	2.59744	0.010765	0.175207	-2.88064
MYSM1	0.214099	3.84371	3.1205	0.00234194	0.0932311	-1.58101
DYNC2H1	0.213969	3.78484	2.22017	0.0285962	0.28427	-3.68905
ZC3H6	0.213745	4.90336	2.1442	0.0343663	0.308603	-3.83808
ALG13	0.213692	5.19205	2.23703	0.0274366	0.280115	-3.65533
MESDC2	0.213691	5.96221	2.18885	0.0308639	0.294149	-3.75107
PLIN5	0.213454	3.44586	2.64403	0.00947198	0.16692	-2.7731
ZCCHC8	0.213253	6.19663	2.06085	0.0418337	0.334113	-3.99616
FGD5-AS1	0.21317	5.4786	2.70591	0.00797231	0.156452	-2.62774
LOC100286925	0.212823	3.17243	1.98604	0.0496831	0.358468	-4.13316
LINC01087	0.211842	2.56627	2.01153	0.0468781	0.349442	-4.087
UBQLN2	0.211676	6.92106	2.02556	0.045393	0.344704	-4.06137
RNF141	0.211251	4.17138	3.0991	0.00250211	0.096323	-1.63806
CLCN7	0.2109	6.18878	2.22215	0.0284575	0.284047	-3.6851
DPP8	0.210812	6.80278	2.1003	0.0381414	0.321588	-3.92206
WIBG	0.209939	4.80851	3.34997	0.00112992	0.0676035	-0.949453
HECTD2	0.209415	3.41716	2.5946	0.0108486	0.175621	-2.88714
SLC48A1	0.209248	3.72471	2.483	0.0146408	0.204737	-3.13767
FAM200B	0.209222	5.51413	2.27026	0.0252713	0.267412	-3.58821
C4orf47	0.20908	3.16902	2.08982	0.0390939	0.325401	-3.94187
CSRNP2	0.209036	5.97269	2.02957	0.0449757	0.343485	-4.05401
BBIP1	0.208955	5.17932	2.40146	0.01812	0.222686	-3.31459
MOSPD2	0.208873	4.54384	2.2288	0.0279969	0.28304	-3.67181
CCPG1	0.20881	3.37086	2.60562	0.010527	0.173192	-2.86188
DHRS4-AS1	0.208218	4.72689	2.18008	0.0315259	0.296999	-3.76828
ZMYND10	0.208215	3.88504	2.08636	0.0394129	0.326158	-3.94839
GOLGA1	0.207931	4.85761	2.07272	0.0406919	0.330545	-3.974
ARHGAP6	0.207589	3.38112	2.21002	0.0293147	0.287664	-3.70924
PER3	0.207457	3.3218	3.12813	0.00228718	0.0924906	-1.56059
AP1AR	0.206932	3.58589	3.33784	0.00117533	0.0693073	-0.983731
SENP7	0.206739	3.93939	2.93924	0.00406079	0.115086	-2.05397
MAGI3	0.206582	3.79437	2.8196	0.00576673	0.134856	-2.35318
DENND4A	0.206265	4.28099	2.93873	0.00406693	0.1151	-2.05526
CCDC64	0.206197	4.50463	2.03838	0.0440712	0.340425	-4.0378
C2orf27A	0.206134	4.45389	2.17366	0.0320188	0.298075	-3.78085
DERL2	0.205997	6.13681	2.12239	0.0361997	0.316785	-3.88001
SNRK	0.205926	4.25423	3.40151	0.000954698	0.0616247	-0.802711
TSC22D3	0.205369	4.07472	2.78119	0.00644018	0.141394	-2.44702
SFMBT1	0.204798	4.1295	2.09582	0.0385463	0.322855	-3.93054
DYNC2LI1	0.203857	4.89257	2.23803	0.0273694	0.27995	-3.65334
LNPEP	0.203662	4.63095	2.40532	0.0179402	0.221274	-3.30634
IRF2	0.203358	6.45793	2.74924	0.00705437	0.148657	-2.52425
ZDHHC24	0.202805	4.88997	2.04818	0.043083	0.338111	-4.0197
TSPAN3	0.20261	4.39822	2.53461	0.01276	0.190442	-3.02301
NNT	0.201979	3.51694	2.44721	0.0160866	0.212809	-3.21596
PHF2	0.201942	4.25403	2.68644	0.00841924	0.160106	-2.6738
KIAA1211L	0.201843	4.18949	2.20416	0.0297366	0.289472	-3.72085
BRE	0.201681	5.94231	2.11278	0.0370336	0.318717	-3.89835
ZNF792	0.201254	4.02128	2.16941	0.0323489	0.299855	-3.78916
ATP6V1H	0.20122	4.97955	2.40643	0.0178885	0.221082	-3.30395
KANK2	0.201204	4.85712	3.4989	0.000691113	0.0518006	-0.520683
GPC3	0.201098	2.92712	1.99531	0.0486468	0.355377	-4.11644
GLCCI1	0.200944	4.10325	2.6155	0.010246	0.172129	-2.83916
ATP5S	0.200685	4.67849	2.23085	0.0278565	0.282329	-3.66771
SRSF5	0.20066	7.26655	2.04526	0.0433759	0.338111	-4.02511
STRN3	0.200132	4.91865	2.11858	0.0365287	0.317523	-3.88729
ELMOD2	0.19937	3.99923	2.71759	0.0077148	0.155811	-2.59999
STAMBPL1	0.199141	3.58486	2.27716	0.0248414	0.264641	-3.57418
ADCY6	0.198523	4.95753	2.14416	0.0343699	0.308603	-3.83816
NEK9	0.198511	4.20846	4.30964	3.74571e-05	0.0158092	2.05276
LHPP	0.198371	4.44044	2.41669	0.0174191	0.219576	-3.28194
RAB28	0.198257	5.83551	3.02064	0.00318039	0.10429	-1.84445
METTL14	0.197156	4.99366	2.92369	0.00425262	0.117664	-2.09345
FRS2	0.196499	3.74562	2.16125	0.0329904	0.302946	-3.80505
CMTM6	0.195274	5.7172	2.119	0.0364917	0.317344	-3.88648
IDUA	0.195209	2.99452	3.14746	0.00215372	0.0906777	-1.50869
SEC24D	0.195131	4.14659	2.09478	0.0386405	0.323379	-3.9325
PLXNC1	0.194869	4.16825	2.13235	0.0353525	0.312072	-3.86092
TMEM120B	0.193914	3.36394	2.45357	0.0158208	0.211092	-3.20212
IL1RN	0.193053	3.06576	2.67825	0.00861389	0.160447	-2.69309
HIPK2	0.19305	4.79766	2.03685	0.0442267	0.340597	-4.04062
MPP2	0.192875	2.58286	2.1196	0.0364398	0.31729	-3.88533
CLCN6	0.192502	2.66836	2.70094	0.00808437	0.157997	-2.63953
NEGR1	0.192476	2.71951	2.47873	0.014807	0.205689	-3.14707
ICE2	0.192356	4.45734	2.78627	0.00634729	0.140848	-2.43468
EIF4G3	0.192114	4.75418	2.54173	0.0125181	0.188066	-3.00701
ALG14	0.191362	4.13378	2.25663	0.0261405	0.272279	-3.61585
DICER1	0.190895	5.32354	2.84175	0.0054083	0.130559	-2.29857
DCUN1D3	0.190593	4.61609	2.68078	0.00855316	0.160447	-2.68712
CDKN2AIPNL	0.190429	3.09043	2.32405	0.0220839	0.247427	-3.47769
SLC25A24	0.189731	4.91603	2.16623	0.0325974	0.300861	-3.79535
PWWP2A	0.189295	4.25123	3.04334	0.00296848	0.10173	-1.78519
BBS1	0.188189	3.84527	2.74628	0.00711385	0.149296	-2.53136
SLC35D2	0.188153	4.98387	2.57155	0.0115501	0.180825	-2.93966
SCAMP1	0.187628	5.61702	1.99567	0.0486067	0.355338	-4.11578
PPP1R2	0.187458	5.00488	2.0384	0.0440693	0.340425	-4.03777
PRDM10	0.186936	3.78739	2.43365	0.0166673	0.215692	-3.24538
BRAP	0.186885	5.46377	2.05127	0.0427758	0.337164	-4.01398
TAPT1	0.186833	3.67929	3.20773	0.0017826	0.0836594	-1.34517
EEA1	0.186706	4.86803	2.08434	0.0396	0.32688	-3.95219
RNF170	0.186458	4.32885	2.04981	0.0429204	0.33764	-4.01667
SLC25A4	0.186344	4.56818	2.20823	0.0294426	0.287745	-3.71278
ATP2A2	0.186249	5.76219	2.86552	0.00504649	0.127117	-2.23958
TXLNA	0.186074	4.14001	2.17746	0.0317261	0.297278	-3.77341
KIAA0141	0.185834	4.38853	2.71729	0.00772123	0.155811	-2.60069
MAT2B	0.185613	5.14308	2.14932	0.0339481	0.307786	-3.82819
SIRT3	0.185584	4.18238	2.89185	0.00467174	0.123	-2.17375
METTL10	0.185527	4.09828	2.06035	0.0418825	0.334113	-3.9971
KCTD18	0.184932	3.83087	2.60658	0.0104992	0.172975	-2.85966
LARP4	0.184878	4.36308	2.70679	0.00795263	0.156452	-2.62565
AFF1	0.183989	4.70944	3.49441	0.000701572	0.0523913	-0.533812
RALB	0.183885	6.6036	2.17599	0.0318389	0.297619	-3.77629
FAM199X	0.183534	5.92759	2.23085	0.0278564	0.282329	-3.66771
SMAD3	0.183373	3.71854	2.89312	0.00465424	0.122726	-2.17055
VPS13D	0.181947	4.67428	2.24873	0.0266565	0.275199	-3.63181
STXBP6	0.181566	2.58623	2.03262	0.0446607	0.342591	-4.04841
RSG1	0.181295	3.68842	2.77896	0.00648141	0.142044	-2.45243
LOC102724927	0.18099	2.56167	2.29259	0.0239022	0.258094	-3.54262
OTUD7B	0.179313	4.64786	2.21395	0.0290343	0.286175	-3.70142
XIAP	0.179272	5.16139	2.35654	0.0203357	0.237234	-3.40983
TSC22D1	0.179146	4.92122	2.82877	0.00561583	0.133153	-2.33062
FAM204A	0.1791	4.82797	2.14639	0.0341871	0.308603	-3.83386
FLYWCH1	0.178875	3.68587	2.55079	0.0122169	0.186182	-2.98664
ZNRF2	0.178405	4.29776	1.9978	0.0483721	0.35451	-4.11194
MGEA5	0.178306	5.47341	2.31324	0.0226944	0.25077	-3.50009
HECTD4	0.178124	3.54417	3.70495	0.000341995	0.0419036	0.0960985
ALKBH1	0.175804	4.05067	2.44109	0.0163463	0.214164	-3.22925
TMF1	0.175284	5.393	2.06823	0.0411209	0.332286	-3.98241
NUP62CL	0.175107	2.54839	2.28691	0.0242444	0.260824	-3.55426
SIN3A	0.174829	4.97058	2.17749	0.031724	0.297278	-3.77336
PRKCH	0.174567	3.62862	2.14964	0.0339222	0.307786	-3.82757
IDS	0.173731	4.50285	2.8813	0.00481873	0.124352	-2.20019
RALGPS1	0.172987	3.20252	3.80245	0.000242918	0.0362816	0.397163
HIP1	0.172924	3.58766	2.73533	0.00733792	0.151805	-2.55762
RSPH3	0.172603	3.6907	2.3366	0.0213933	0.243498	-3.45157
PIGQ	0.172345	4.36533	2.4594	0.0155807	0.209745	-3.18942
GARNL3	0.172263	3.78044	2.27587	0.0249209	0.265133	-3.57679
PELI2	0.171667	2.72905	2.49418	0.0142136	0.202393	-3.11301
IKZF2	0.171096	3.40462	2.24716	0.0267603	0.275759	-3.63498
SLC22A23	0.170828	3.55577	2.32775	0.0218782	0.246379	-3.47
SLC25A21-AS1	0.170744	3.61382	2.10462	0.0377552	0.320559	-3.91387
RMST	0.170543	2.44192	2.05464	0.0424427	0.335573	-4.00772
SFXN5	0.170475	3.72244	2.41704	0.0174033	0.219576	-3.28119
CCAR2	0.17046	4.63291	2.23325	0.0276931	0.281651	-3.66292
IFT27	0.169481	3.32018	2.46128	0.0155037	0.209121	-3.1853
RASGRF2	0.169455	3.39441	2.3578	0.0202701	0.2372	-3.40717
C12orf76	0.16923	3.8157	2.957	0.00385155	0.112426	-2.00868
FYCO1	0.169098	4.96206	2.08659	0.039392	0.326158	-3.94797
TRIM8	0.168893	5.48731	3.15815	0.00208302	0.0891691	-1.47986
ABR	0.168564	4.74267	2.2017	0.0299146	0.290544	-3.7257
IFT80	0.167946	5.23588	2.18433	0.0312036	0.29568	-3.75995
ARL3	0.167696	5.02922	2.54393	0.0124444	0.187685	-3.00208
SLC25A40	0.167691	4.16224	2.25677	0.0261318	0.272279	-3.61558
ARMC9	0.167159	3.43269	2.58679	0.0110818	0.177444	-2.90498
FBXO38	0.166898	5.73928	2.42615	0.0169962	0.21736	-3.26158
STK36	0.166829	3.28153	2.02274	0.0456878	0.345339	-4.06653
GTF2A1	0.166475	4.93412	1.99158	0.0490619	0.356284	-4.12318
ING2	0.166096	4.63936	2.1099	0.037287	0.319099	-3.90384
UNKL	0.165981	4.39742	2.4929	0.0142619	0.202613	-3.11584
ZSCAN32	0.16425	3.28893	2.61768	0.0101849	0.171659	-2.83413
PQLC2	0.164076	3.05075	2.13031	0.0355248	0.312913	-3.86484
LINC00663	0.163319	3.52235	2.39395	0.0184749	0.22523	-3.33063
PGPEP1	0.162013	3.54224	2.84567	0.00534707	0.130407	-2.28888
NEK4	0.161078	4.48913	2.11127	0.0371664	0.319077	-3.90123
DCTN4	0.160964	4.65188	2.33589	0.0214319	0.243498	-3.45305
SMPD3	0.160771	2.53303	2.47662	0.0148895	0.206135	-3.15169
FDXACB1	0.160471	2.45402	2.27021	0.0252749	0.267412	-3.58833
ERLIN1	0.159735	5.53485	2.04588	0.0433132	0.338111	-4.02395
NBPF3	0.158672	3.68271	2.34554	0.0209131	0.240137	-3.43289
RNLS	0.158234	4.14522	1.99328	0.0488717	0.356003	-4.1201
WDR90	0.158135	4.63124	2.27128	0.0252073	0.266973	-3.58614
MAT2A	0.157666	6.62395	2.25449	0.0262792	0.27299	-3.62017
HIPK1	0.157098	4.00226	3.08131	0.00264296	0.0976189	-1.68524
TMCO3	0.156887	3.88216	2.01822	0.0461653	0.347164	-4.07481
ABCD4	0.156669	4.60174	2.28903	0.0241157	0.259851	-3.5499
HERC4	0.156218	3.81408	2.07964	0.0400383	0.329418	-3.96102
TAOK3	0.156133	6.14115	2.07837	0.0401582	0.329874	-3.96342
SEMA3E	0.155598	2.48317	2.10996	0.0372816	0.319099	-3.90372
CAPS2	0.154526	2.54489	3.00396	0.00334499	0.105161	-1.88778
MTHFR	0.152976	4.16102	2.36007	0.020153	0.236451	-3.40239
MFSD8	0.152966	3.82061	2.02721	0.0452209	0.344276	-4.05834
IPPK	0.152703	4.02876	3.00992	0.00328533	0.104851	-1.87233
PCSK6	0.151598	2.87185	2.07034	0.0409192	0.331326	-3.97847
HKR1	0.151154	3.4831	2.86916	0.00499306	0.126289	-2.2305
CDON	0.151052	3.20702	2.41202	0.0176317	0.220853	-3.29198
DUSP18	0.150326	3.67021	2.47342	0.015016	0.206363	-3.15873
MDM2	0.149756	3.56419	3.19601	0.00184977	0.0851612	-1.37718
RHOB	0.14885	3.42244	2.30229	0.0233281	0.255125	-3.52269
ZNF180	0.148284	3.19473	2.40807	0.0178129	0.221082	-3.30044
CCDC30	0.148069	2.47772	3.03684	0.00302784	0.102406	-1.80221
2019-03-06	0.147115	5.5119	2.26478	0.0256181	0.269096	-3.59936
ECE1	0.146989	4.58826	2.20021	0.0300239	0.291023	-3.72867
FBXO4	0.146545	3.21169	3.08039	0.00265047	0.0976189	-1.68768
LOC283788	0.146119	3.53238	1.99388	0.0488051	0.355874	-4.11902
UEVLD	0.145744	4.50333	2.32145	0.0222295	0.247884	-3.48309
RPF1	0.145459	4.32788	2.47467	0.0149664	0.206363	-3.15597
DDO	0.145218	3.04834	3.20183	0.00181611	0.084843	-1.36129
ZNF326	0.145137	4.13357	2.22076	0.0285549	0.284209	-3.68788
SLC23A1	0.145081	2.42471	2.23687	0.0274475	0.280115	-3.65566
FAM160B1	0.144166	4.98213	2.02423	0.0455321	0.34487	-4.06381
WDR6	0.143817	5.71932	2.0127	0.046753	0.349077	-4.08488
ANAPC13	0.143281	5.88379	2.02183	0.0457844	0.345697	-4.06821
BTRC	0.143077	2.95646	2.78524	0.00636607	0.140848	-2.43719
FBXO42	0.142868	5.03196	2.7141	0.00779094	0.155834	-2.60829
SLC12A6	0.142836	3.56133	2.36154	0.0200774	0.236083	-3.39929
TMEM229B	0.14261	2.66922	2.68469	0.00846041	0.160447	-2.67792
ZNF718	0.142117	2.88027	2.22491	0.0282659	0.283367	-3.6796
LOC100499489	0.141527	3.08103	2.44301	0.0162645	0.213748	-3.22509
ARSA	0.140939	3.3717	2.21984	0.0286188	0.28427	-3.6897
CERS5	0.140612	4.95063	2.4802	0.0147494	0.205308	-3.14382
CHM	0.140399	3.90156	2.6844	0.00846732	0.160447	-2.67861
DNAL1	0.140167	3.37628	2.08693	0.0393603	0.326158	-3.94732
FAM175A	0.139956	3.87008	2.52411	0.0131241	0.192947	-3.04651
BRPF3	0.139301	2.82497	2.55876	0.0119567	0.183424	-2.96863
PPP3CC	0.138402	3.19963	2.11743	0.0366283	0.317916	-3.88949
UHRF1BP1L	0.138374	3.45323	2.58122	0.0112509	0.179065	-2.91767
RCBTB1	0.137825	3.85719	2.29747	0.0236121	0.256585	-3.53261
IKZF4	0.137595	3.84819	2.73696	0.00730418	0.151427	-2.55372
TBRG1	0.137301	4.09464	2.1654	0.0326628	0.300921	-3.79698
TAB3	0.136524	4.09309	3.08013	0.00265253	0.0976189	-1.68835
FAM63B	0.135631	3.75097	2.06334	0.0415918	0.333615	-3.99152
LEKR1	0.135419	2.64991	2.03639	0.0442746	0.34063	-4.04148
BAZ2A	0.135316	4.36776	2.88847	0.00471831	0.123	-2.18222
ACAT1	0.134661	4.46502	2.11478	0.0368586	0.31796	-3.89453
PHC3	0.13397	4.55713	2.64936	0.00933354	0.165496	-2.76071
DDAH1	0.132934	4.49462	2.60047	0.0106762	0.174679	-2.87369
LOC101928896	0.132348	2.53278	2.32144	0.0222298	0.247884	-3.4831
MAATS1	0.132036	2.71517	2.30631	0.0230939	0.253922	-3.51441
TMCC1	0.131421	4.69799	2.04319	0.0435843	0.338368	-4.02893
C9orf41	0.131327	4.49399	2.5291	0.0129499	0.191876	-3.03535
PRND	0.131041	2.554	2.18386	0.0312393	0.29568	-3.76087
VPS33A	0.129982	3.69894	2.71217	0.00783329	0.156343	-2.61288
C5orf42	0.129386	3.22199	2.37004	0.0196458	0.233403	-3.38137
KIAA1430	0.126996	4.4852	3.1459	0.00216422	0.0906843	-1.51289
CACUL1	0.126133	3.99781	2.60183	0.0106366	0.174256	-2.87057
NHLRC2	0.124675	3.09994	2.386	0.018857	0.22818	-3.34754
CILP2	0.124463	2.62741	2.15857	0.0332037	0.304012	-3.81026
ERVK13-1	0.124189	3.67752	2.15177	0.0337498	0.306722	-3.82345
EXOC4	0.123861	4.44669	2.09885	0.0382725	0.321879	-3.92481
ATE1	0.122799	3.35427	3.13077	0.00226852	0.0922831	-1.55352
PDE4A	0.122356	3.26561	2.10156	0.0380288	0.321341	-3.91968
SLITRK4	0.122231	2.49956	2.01233	0.0467922	0.349184	-4.08555
VAPA	0.120882	5.98479	2.04551	0.0433505	0.338111	-4.02464
SERP2	0.120288	2.84213	1.98448	0.0498594	0.358913	-4.13597
STAM2	0.119764	4.39867	2.11969	0.0364324	0.31729	-3.88517
FAM120A	0.119614	5.03204	2.8761	0.00489262	0.124829	-2.21318
SMUG1	0.119106	4.2217	2.10748	0.0375011	0.319568	-3.90844
LRIG2	0.11802	3.97293	2.51422	0.0134756	0.195143	-3.06856
SLC6A6	0.117912	3.63062	2.87004	0.0049802	0.12612	-2.22831
TWF1	0.117524	3.93665	2.65094	0.00929284	0.165254	-2.75703
ABHD4	0.115735	3.81459	2.00988	0.0470553	0.350508	-4.09001
CASP9	0.114552	4.02158	2.60036	0.0106795	0.174679	-2.87395
TNKS	0.114393	3.61228	2.22121	0.0285231	0.284209	-3.68697
PIH1D2	0.114057	2.42545	2.09833	0.0383195	0.322084	-3.9258
LOC100130691	0.113998	2.45445	2.09984	0.0381825	0.321588	-3.92292
PDE1A	0.113855	2.58755	2.6867	0.00841296	0.160106	-2.67317
CTC1	0.113621	3.27682	1.99941	0.0481946	0.353965	-4.10902
NMNAT1	0.113336	3.036	2.59401	0.0108662	0.175632	-2.88849
CDK9	0.113185	3.79045	2.1748	0.031931	0.297951	-3.77863
ZMYM6	0.112071	3.42238	2.48972	0.0143824	0.2031	-3.12285
PGM5	0.111277	2.80978	2.16398	0.0327746	0.30168	-3.79974
SYNJ1	0.109746	3.66541	1.99397	0.0487953	0.355874	-4.11886
ELMOD3	0.108847	3.61805	2.06458	0.0414723	0.33344	-3.98922
POLR2A	0.108813	3.44735	2.54082	0.0125489	0.188342	-3.00907
PTPN1	0.108677	3.29721	2.46501	0.0153523	0.208176	-3.17714
FGGY	0.108226	3.10009	1.98751	0.0495174	0.357777	-4.13051
GIPR	0.107988	2.92519	2.2365	0.0274726	0.280231	-3.6564
RERE	0.107241	3.54275	2.18966	0.0308031	0.294118	-3.74947
GLYR1	0.107181	4.19113	2.52584	0.0130633	0.192858	-3.04263
ADAL	0.105985	2.91634	2.08984	0.0390917	0.325401	-3.94183
MFN2	0.104082	4.14816	2.03855	0.0440538	0.340425	-4.03749
N4BP2L1	0.103432	3.31305	2.37427	0.0194341	0.231602	-3.37243
METTL20	0.103333	2.5783	2.40909	0.0177659	0.221082	-3.29826
TENM3	0.103126	2.88337	2.00175	0.0479376	0.353477	-4.10477
PITHD1	0.102957	3.96481	2.00267	0.047837	0.353245	-4.10311
TSC22D1-AS1	0.101282	2.71577	2.04266	0.0436371	0.338418	-4.0299
SLC24A1	0.0982946	3.32074	2.92264	0.00426589	0.117664	-2.09611
LOC102725383	0.0968993	2.47494	2.1612	0.0329944	0.302946	-3.80515
SP2	0.09557	3.29275	2.39651	0.0183531	0.224672	-3.32516
TMEM67	0.094255	2.85237	2.50918	0.0136576	0.196943	-3.07975
GLS2	0.0897981	2.48445	2.02758	0.0451825	0.344276	-4.05767
USP22	0.0897138	4.05205	2.65957	0.00907312	0.163845	-2.73687
PCNXL4	0.0882133	3.51674	2.31033	0.0228612	0.252175	-3.5061
TOR2A	0.084859	2.87911	2.07164	0.0407948	0.330814	-3.97603
PTPN9	0.0839023	2.69779	1.99794	0.0483563	0.35451	-4.11168
SGK2	0.0821166	2.65623	2.02501	0.0454506	0.344704	-4.06238
VIP	0.0813698	2.37308	2.33255	0.021614	0.244839	-3.46001
C1orf101	0.080451	2.37957	2.20986	0.0293259	0.287664	-3.70955
NPHP4	0.0778556	2.87725	2.23755	0.0274016	0.280065	-3.65429
APOF	0.0776701	2.3693	2.16548	0.0326559	0.300921	-3.79681
LINC01089	0.0773066	4.18385	2.16094	0.0330151	0.302946	-3.80566
BTBD9	0.0756286	3.00714	2.17726	0.0317413	0.297278	-3.7738
ANKFY1	0.0745658	3.55051	2.07986	0.0400177	0.329381	-3.96061
ZNF407	0.0714786	3.34917	2.16266	0.0328785	0.302364	-3.8023
C4orf33	0.0673836	2.53131	2.05687	0.0422233	0.334873	-4.00358
PASD1	0.0658779	2.37022	2.06083	0.041836	0.334113	-3.99621
TNRC6C	0.0657297	2.58779	2.12766	0.035749	0.314216	-3.86991
DSCR10	0.064301	2.37525	2.14153	0.0345862	0.309041	-3.84323
NUDT4	0.0618942	2.36722	2.40288	0.0180538	0.222139	-3.31156
MCHR1	0.0567297	2.35762	2.41345	0.0175663	0.220652	-3.28891
2019-03-10	0.0495251	2.35415	2.04544	0.0433572	0.338111	-4.02476
LOC285500	0.0456598	2.34261	2.06239	0.0416844	0.333965	-3.9933
ARMC2	0.0452759	2.35268	1.98356	0.0499638	0.359479	-4.13763
IQCH	0.0387121	2.36835	2.26819	0.0254018	0.268239	-3.59242
OTUD7A	0.0293049	2.3391	2.24171	0.0271223	0.278324	-3.64594
LOC100507562	-0.0146587	2.32173	-2.07464	0.0405102	0.330545	-3.97042
C5orf58	-0.0151949	2.32149	-1.99247	0.0489618	0.356026	-4.12156
LOC151760	-0.0152382	2.31954	-2.07262	0.0407013	0.330545	-3.97419
IMPG1	-0.01772	2.31963	-1.99759	0.0483948	0.354549	-4.11231
LOC100506071	-0.0183091	2.32094	-1.9999	0.0481403	0.353965	-4.10813
LOC101929460	-0.0189102	2.32653	-2.01725	0.0462681	0.347172	-4.07658
CSHL1	-0.0191326	2.33574	-2.07787	0.0402046	0.330123	-3.96435
LOC100505685	-0.0222995	2.327	-2.06059	0.0418593	0.334113	-3.99665
AQP8	-0.0225861	2.3215	-2.04966	0.0429352	0.33764	-4.01695
C18orf61	-0.025638	2.33104	-2.30266	0.0233064	0.255125	-3.52193
RANBP3L	-0.0267547	2.32452	-2.07439	0.0405334	0.330545	-3.97088
CPXCR1	-0.0270155	2.32821	-2.6752	0.00868743	0.161016	-2.70026
PSG1	-0.0284287	2.33392	-2.65051	0.00930371	0.165254	-2.75801
OSTCP1	-0.0302132	2.32868	-2.1594	0.0331375	0.303691	-3.80865
LOC100131763	-0.0305767	2.32892	-2.03115	0.0448127	0.342788	-4.05112
COX6A2	-0.0313332	2.32649	-2.38281	0.0190124	0.228842	-3.35432
ANKRD24	-0.0316937	2.33603	-2.46934	0.0151784	0.207283	-3.16767
MYH13	-0.0317732	2.33022	-2.08386	0.039645	0.327103	-3.95311
MCF2	-0.0343611	2.34	-2.6612	0.00903222	0.163587	-2.73307
PCDHAC1	-0.0349913	2.33756	-2.66167	0.00902032	0.163587	-2.73196
LOC100128239	-0.0353697	2.32871	-2.11899	0.0364925	0.317344	-3.8865
NCR1	-0.0361899	2.34331	-2.28074	0.0246202	0.263345	-3.56686
CHIA	-0.0364066	2.33432	-2.48102	0.0147175	0.205143	-3.14203
C15orf62	-0.0376447	2.33079	-2.31697	0.0224822	0.249786	-3.49237
DRD2	-0.0378423	2.36795	-1.99138	0.0490844	0.356284	-4.12355
BSND	-0.037898	2.35896	-2.91867	0.00431628	0.118232	-2.10615
LRRC3	-0.0379889	2.33501	-2.14077	0.0346496	0.309127	-3.84471
IGFBP1	-0.039126	2.33575	-2.57073	0.0115757	0.181088	-2.94152
SPERT	-0.0398011	2.35183	-2.28516	0.0243503	0.261516	-3.55783
LOC400965	-0.0412771	2.34474	-2.14305	0.0344609	0.308804	-3.8403
LINC00687	-0.041924	2.33155	-2.26332	0.025711	0.269518	-3.60232
KLF17	-0.042043	2.33364	-2.32221	0.0221868	0.247884	-3.48151
HRH3	-0.0426966	2.4431	-2.01504	0.0465026	0.348293	-4.08061
SIGLECL1	-0.0435303	2.33166	-2.10212	0.0379783	0.321121	-3.91861
FLT4	-0.0437952	2.50729	-2.46774	0.0152425	0.207513	-3.17118
MTSS1L	-0.0439797	2.35537	-2.21036	0.0292899	0.287586	-3.70855
LOC285819	-0.0441749	2.33435	-2.628	0.0099001	0.170806	-2.81029
CUBN	-0.0448879	2.3358	-2.49845	0.0140533	0.201023	-3.10357
ZNF428	-0.0450271	2.34865	-2.63198	0.0097923	0.170192	-2.80109
OR1D2	-0.0453937	2.33577	-2.32419	0.022076	0.247427	-3.4774
LOC100507283	-0.0454907	2.34013	-2.27689	0.0248578	0.264641	-3.57472
ZIC4	-0.045871	2.34706	-2.26195	0.0257985	0.269744	-3.60509
TAAR8	-0.0458736	2.33158	-2.26849	0.0253826	0.268239	-3.59181
GUCA1A	-0.0462834	2.55576	-2.19843	0.0301536	0.291461	-3.73217
TMEM114	-0.0472556	2.34362	-2.22527	0.0282406	0.283367	-3.67887
KLF14	-0.0476629	2.3327	-2.54856	0.0122905	0.186702	-2.99167
SERPINB12	-0.0480913	2.34956	-2.0625	0.0416732	0.333965	-3.99309
CTB-113P19.1	-0.0481295	2.33934	-2.02312	0.0456488	0.3453	-4.06585
LINC01449	-0.0489583	2.35088	-2.12362	0.0360941	0.316028	-3.87765
TMEM95	-0.049068	2.33758	-2.3657	0.0198651	0.234824	-3.39053
KCNK9	-0.0495532	2.35231	-2.01345	0.0466728	0.349077	-4.08351
ASIP	-0.04996	2.33277	-2.68728	0.00839932	0.1601	-2.6718
LOC101929524	-0.0509936	2.34391	-2.43732	0.0165081	0.215015	-3.23742
LINC00310	-0.0512632	2.347	-2.32325	0.0221285	0.247563	-3.47935
RDH12	-0.0521031	2.33386	-2.64586	0.00942421	0.166527	-2.76885
TRPV3	-0.0526757	2.37286	-2.03565	0.0443499	0.340776	-4.04283
ADGB	-0.0528105	2.34043	-2.5682	0.0116556	0.181599	-2.94728
SNX32	-0.052976	2.34884	-2.13587	0.0350566	0.310367	-3.85414
ADRA1D	-0.0530678	2.35244	-2.20817	0.0294467	0.287745	-3.71289
LMX1A	-0.0531125	2.33563	-2.2184	0.0287199	0.284584	-3.69257
TMEM51-AS1	-0.0548764	2.37547	-2.2674	0.0254518	0.268246	-3.59403
CADM3	-0.0548875	2.41047	-2.52348	0.0131462	0.192947	-3.04791
LOC284661	-0.0549533	2.36502	-1.9854	0.0497555	0.358699	-4.13432
TLR8-AS1	-0.055221	2.3341	-2.48529	0.0145522	0.20437	-3.13262
FGF13-AS1	-0.0553898	2.33495	-2.57407	0.0114714	0.180172	-2.93394
TRPM6	-0.055443	2.36268	-2.81527	0.00583941	0.135234	-2.36383
LOC101927550	-0.0555093	2.36113	-2.01537	0.0464682	0.34829	-4.08002
LINC01146	-0.0556319	2.33513	-2.66904	0.0088375	0.161892	-2.7147
KRT12	-0.0560311	2.33893	-2.66085	0.009041	0.163587	-2.73389
SYT3	-0.0562983	2.33998	-2.41045	0.0177033	0.220913	-3.29534
ACOT6	-0.0563616	2.3412	-2.30473	0.0231855	0.254791	-3.51766
SFTA2	-0.0564796	2.35843	-2.06501	0.0414309	0.333238	-3.98842
SSMEM1	-0.0568227	2.34988	-2.50456	0.0138266	0.19868	-3.09001
LOC100287704	-0.0571385	2.34429	-2.05184	0.0427194	0.337109	-4.01292
HIF3A	-0.0581259	2.38071	-2.52213	0.0131937	0.192947	-3.05092
NTSR1	-0.0582589	2.34127	-2.29869	0.0235396	0.256206	-3.53009
TTLL11	-0.0587991	2.63518	-2.3964	0.0183585	0.224672	-3.3254
DAOA	-0.0588493	2.35966	-2.36286	0.0200099	0.23599	-3.39652
NEUROG2	-0.0591779	2.33633	-2.8093	0.0059408	0.135974	-2.37847
TBX18	-0.0595583	2.37616	-2.11589	0.036762	0.317916	-3.89242
ALX1	-0.0599641	2.35765	-2.21885	0.0286887	0.284413	-3.69168
FLJ31356	-0.0599707	2.34671	-2.44767	0.0160672	0.212809	-3.21496
NLRP8	-0.0599748	2.34846	-2.21491	0.0289664	0.285915	-3.69952
PCYT1B	-0.059992	2.63174	-2.01276	0.0467463	0.349077	-4.08476
NEUROD2	-0.0604606	2.39282	-2.17715	0.0317503	0.297278	-3.77403
DNTT	-0.0607546	2.47013	-2.10097	0.0380811	0.321542	-3.92078
ZNF821	-0.0608843	2.52104	-2.22322	0.0283832	0.283817	-3.68297
RNF152	-0.0610369	2.37182	-2.21676	0.0288353	0.2849	-3.69583
PCDHB11	-0.0615009	2.34354	-2.07716	0.0402721	0.330225	-3.96569
C9orf50	-0.0620053	2.36113	-2.30329	0.0232693	0.255125	-3.52062
CMTM2	-0.0628166	2.35103	-2.8614	0.00510758	0.127921	-2.24984
USP27X-AS1	-0.0628555	2.43037	-2.36847	0.0197248	0.233841	-3.38468
LINC00689	-0.0629222	2.41211	-2.45498	0.0157626	0.210807	-3.19906
PATE1	-0.0636055	2.38217	-2.01998	0.0459792	0.346529	-4.07159
GABRG1	-0.0638783	2.35972	-2.15292	0.0336564	0.306215	-3.82121
KIF9-AS1	-0.0644377	2.41257	-2.11015	0.0372646	0.319099	-3.90335
TMEM132D	-0.0654227	2.34595	-2.07842	0.040153	0.329874	-3.96332
KRTAP4-4	-0.0661359	2.33891	-2.49532	0.0141706	0.202062	-3.11049
LOC101927701	-0.0673609	2.3553	-2.0863	0.0394189	0.326158	-3.94852
KRTAP7-1	-0.0675507	2.35973	-2.62927	0.00986548	0.170389	-2.80735
PRKACG	-0.0677584	2.37149	-1.99858	0.0482864	0.354389	-4.11053
TEX15	-0.0690449	2.35052	-2.52853	0.0129698	0.192032	-3.03663
ADCY10	-0.0701921	2.38676	-2.65054	0.00930307	0.165254	-2.75795
IDI2-AS1	-0.0704193	2.34472	-2.30271	0.0233032	0.255125	-3.52181
LRRC74	-0.0704253	3.13629	-2.07591	0.04039	0.330412	-3.96804
OCR1	-0.0705301	2.37088	-2.04668	0.0432329	0.338111	-4.02247
MIP	-0.0706395	2.36366	-2.22621	0.0281758	0.283367	-3.677
AGAP6	-0.0709627	2.53991	-2.49255	0.014275	0.202613	-3.11661
RSPH9	-0.0712584	2.36169	-2.06083	0.0418356	0.334113	-3.9962
GPR37L1	-0.0712601	2.42123	-2.65869	0.00909525	0.163845	-2.73893
KRTAP5-9	-0.0715518	2.35665	-2.4769	0.0148787	0.206126	-3.15109
PPIEL	-0.0717757	2.39044	-2.61168	0.0103539	0.172558	-2.84795
LINC00337	-0.0730132	2.35327	-2.0451	0.0433917	0.338111	-4.0254
RLBP1	-0.0740143	2.34294	-2.3821	0.0190474	0.229128	-3.35584
ESYT3	-0.0740564	2.35593	-2.53835	0.0126324	0.189089	-3.01461
LOC390705	-0.0749566	3.12182	-2.08724	0.0393315	0.326158	-3.94673
LOC374890	-0.0752585	2.36084	-2.19984	0.0300505	0.291143	-3.72939
KLHL17	-0.0764913	3.00328	-2.1288	0.0356526	0.313504	-3.86773
GRM5	-0.0765254	2.6417	-2.17313	0.0320593	0.298181	-3.78188
IFNW1	-0.0765544	2.35794	-2.65435	0.00920543	0.164663	-2.74907
TRPM2-AS	-0.0766386	2.34727	-2.10292	0.0379068	0.320837	-3.9171
DSCR9	-0.0780033	2.36114	-2.36135	0.020087	0.236083	-3.39969
E2F2	-0.0781545	3.08942	-2.04155	0.0437498	0.339094	-4.03196
FLJ30679	-0.0791339	2.36398	-2.07378	0.0405917	0.330545	-3.97203
GPR110	-0.0813551	2.38566	-2.03056	0.0448736	0.342997	-4.0522
LPPR1	-0.0823853	2.39336	-2.09614	0.038517	0.322742	-3.92993
TRIML2	-0.0826596	2.35008	-2.55623	0.0120388	0.184247	-2.97436
PNMA3	-0.0842704	2.46546	-2.00347	0.0477501	0.353106	-4.10166
NKPD1	-0.0844224	2.57741	-2.8804	0.0048314	0.124352	-2.20243
LOC400692	-0.0846937	2.35531	-3.23562	0.00163191	0.0805001	-1.26867
ZNF71	-0.0848181	2.8536	-2.14176	0.0345675	0.309009	-3.84279
SLC6A1	-0.0852292	2.38092	-2.16734	0.0325103	0.300599	-3.79319
LOC101928099	-0.0854095	2.354	-2.42768	0.0169286	0.217091	-3.25828
GRIA4	-0.0855084	2.36501	-2.05708	0.0422021	0.334873	-4.00318
TTBK1	-0.0855422	3.75694	-2.19163	0.030656	0.293895	-3.74558
CWF19L1	-0.0856558	4.16534	-2.09894	0.0382642	0.321879	-3.92464
CCDC116	-0.0856602	2.34754	-2.73451	0.00735495	0.151805	-2.55958
CCDC129	-0.0862707	2.36648	-2.96972	0.00370769	0.110271	-1.97607
SRSF12	-0.0866979	2.3554	-3.15385	0.00211123	0.089813	-1.49148
ZNF835	-0.0868987	2.37775	-2.21227	0.0291539	0.286939	-3.70477
CNTFR	-0.0869996	2.8509	-2.62201	0.0100646	0.171465	-2.82415
C7orf61	-0.0872406	2.64475	-3.22543	0.00168557	0.0815591	-1.2967
CLDN19	-0.0880397	3.23999	-2.65224	0.00925947	0.165254	-2.754
DNAH17	-0.0885437	2.3882	-2.58002	0.0112877	0.179065	-2.92041
LOC100132686	-0.0906727	2.49125	-2.003	0.047801	0.353106	-4.10251
ADIRF-AS1	-0.0907511	2.38304	-2.39455	0.0184463	0.225208	-3.32934
GFRA3	-0.0910122	2.37262	-2.2773	0.0248326	0.264641	-3.57389
DPYS	-0.0911523	2.35661	-2.109	0.0373664	0.319512	-3.90555
ACTRT3	-0.0916161	2.72627	-2.47536	0.0149392	0.206363	-3.15446
GTPBP1	-0.0917106	3.35372	-2.36393	0.0199553	0.235753	-3.39426
HOXA-AS2	-0.0919899	2.43462	-2.77021	0.0066456	0.142989	-2.47365
C10orf90	-0.0921245	2.47979	-2.1908	0.0307181	0.293895	-3.74723
NF2	-0.0921304	3.25219	-2.00363	0.0477323	0.353106	-4.10136
SLC29A2	-0.0921845	2.51256	-2.37798	0.0192499	0.230211	-3.36457
MIR146A	-0.0921905	2.41411	-2.76322	0.00677943	0.144954	-2.49056
NFKBIL1	-0.0932664	2.61641	-1.99273	0.0489334	0.356026	-4.1211
CDC42BPG	-0.093458	2.45535	-2.16857	0.0324141	0.300116	-3.79079
KCNN1	-0.0937286	2.44552	-2.38011	0.0191449	0.229797	-3.36006
MORN5	-0.0941852	2.38984	-2.24699	0.0267714	0.275759	-3.63532
ERCC8	-0.0944007	2.76241	-2.14216	0.0345345	0.30891	-3.84202
UCN2	-0.0947025	2.41122	-2.17761	0.0317151	0.297278	-3.77313
IDH1-AS1	-0.0948955	2.40785	-2.12169	0.0362597	0.316977	-3.88134
ZNF358	-0.0952234	4.10956	-1.9996	0.0481736	0.353965	-4.10868
LINC00896	-0.0960013	2.40333	-2.32589	0.0219816	0.247	-3.47387
LINC00920	-0.0960386	2.36114	-2.03036	0.0448945	0.343029	-4.05257
INTS4	-0.0962474	3.91533	-2.73016	0.00744592	0.15297	-2.56998
SNHG22	-0.0974611	2.40713	-3.05268	0.00288514	0.101599	-1.7607
ALPL	-0.0977113	2.54872	-2.28085	0.0246137	0.263345	-3.56664
TLX1	-0.097889	2.35463	-2.46251	0.0154538	0.208861	-3.18262
IGF2-AS	-0.0980996	2.47352	-2.06537	0.0413961	0.33309	-3.98775
POLDIP3	-0.0981542	4.02965	-2.09724	0.0384174	0.322434	-3.92785
LOC101927841	-0.0988495	2.36693	-2.0316	0.0447656	0.342788	-4.05028
SYT15	-0.0991388	3.27235	-2.10012	0.0381575	0.321588	-3.9224
LOC729683	-0.0996946	2.44798	-2.05692	0.0422184	0.334873	-4.00349
CACNB4	-0.0997617	2.41495	-2.49831	0.0140584	0.201023	-3.10387
HHIP-AS1	-0.0999121	2.44276	-2.13461	0.0351622	0.31066	-3.85656
FAM104B	-0.101031	4.53824	-2.03293	0.0446293	0.342591	-4.04784
ARHGAP42	-0.101214	2.57248	-2.70512	0.00799005	0.156602	-2.62962
ACER1	-0.101309	2.35292	-2.84884	0.00529806	0.130013	-2.28104
UBE3D	-0.1015	2.90793	-2.03649	0.0442636	0.34063	-4.04128
FAM186B	-0.101713	2.47379	-2.14208	0.0345414	0.30891	-3.84218
SLC25A41	-0.101789	2.39905	-2.18458	0.0311847	0.29568	-3.75946
UNC13D	-0.101939	3.0338	-2.16931	0.0323565	0.299855	-3.78935
BOLA3-AS1	-0.101947	2.41161	-2.11271	0.0370399	0.318717	-3.89848
RNF186	-0.102388	2.35925	-2.46339	0.0154178	0.208512	-3.18068
C19orf44	-0.1025	3.04256	-2.09175	0.0389175	0.3249	-3.93824
CCDC140	-0.103022	2.3871	-2.0833	0.0396971	0.327401	-3.95416
EVC2	-0.103153	2.4331	-2.40598	0.0179097	0.221082	-3.30493
OR5L2	-0.104185	2.42775	-2.1066	0.0375788	0.319594	-3.91011
DLG5-AS1	-0.104794	3.33226	-2.69193	0.00829096	0.159744	-2.66084
CAPN14	-0.104936	2.3719	-2.48033	0.0147443	0.205308	-3.14354
TEC	-0.105188	2.38032	-2.8431	0.00538724	0.130559	-2.29525
LOC646482	-0.105214	2.40463	-2.3031	0.0232805	0.255125	-3.52101
CDH4	-0.105409	2.38866	-2.18135	0.031429	0.296496	-3.76578
DIP2A	-0.106618	4.24882	-2.4175	0.0173828	0.219576	-3.28021
NDUFV2-AS1	-0.108044	3.06244	-2.14415	0.0343706	0.308603	-3.83818
TEPP	-0.108179	2.36051	-2.35504	0.0204132	0.237867	-3.41296
RPL37	-0.108434	14.5524	-2.22279	0.0284128	0.283878	-3.68382
TACR1	-0.109644	2.43135	-2.9266	0.00421609	0.1173	-2.08607
CRHR1	-0.109825	2.45124	-2.62919	0.00986763	0.170389	-2.80753
SYDE1	-0.110571	3.65674	-2.3322	0.0216332	0.244839	-3.46074
MAP7D3	-0.110668	2.99025	-2.92434	0.00424445	0.117664	-2.0918
RBL1	-0.111061	3.03727	-2.09988	0.0381793	0.321588	-3.92285
CCSAP	-0.111496	3.59392	-2.22001	0.0286069	0.28427	-3.68936
ZNF496	-0.11211	3.12569	-2.24987	0.0265816	0.274981	-3.62951
IPO9-AS1	-0.112383	2.80443	-2.716	0.00774927	0.155834	-2.60376
ABHD17B	-0.113213	4.19066	-2.46611	0.0153079	0.207873	-3.17474
DDN	-0.113322	2.36662	-2.82275	0.00571456	0.134249	-2.34545
ASGR2	-0.113648	2.82788	-2.59909	0.0107165	0.174916	-2.87686
RNGTT	-0.113822	4.57177	-2.63096	0.0098197	0.17026	-2.80344
LOC101927543	-0.113847	2.60109	-2.16499	0.0326947	0.30108	-3.79777
GPATCH4	-0.113938	4.30723	-2.03632	0.0442809	0.34063	-4.04159
ZNF777	-0.11404	3.32029	-2.30309	0.0232813	0.255125	-3.52104
MADCAM1	-0.114448	2.87021	-2.01971	0.0460075	0.346615	-4.07208
CACNA1B	-0.11463	2.3737	-2.33041	0.0217318	0.245407	-3.46448
OPRK1	-0.114733	2.39177	-2.07354	0.0406141	0.330545	-3.97247
NRG1	-0.115761	2.99944	-1.98324	0.0499992	0.359555	-4.13819
OSBP2	-0.116095	3.30122	-2.08803	0.039259	0.32596	-3.94525
WNT6	-0.116176	2.70221	-3.67838	0.000375024	0.0438809	0.0150793
TBX1	-0.116217	3.08247	-2.22118	0.0285252	0.284209	-3.68703
C1orf145	-0.116307	2.36809	-3.45575	0.000798083	0.0563116	-0.646406
DHODH	-0.116331	2.74894	-2.66109	0.009035	0.163587	-2.73333
BAAT	-0.116708	2.53838	-2.87703	0.00487944	0.124648	-2.21087
RAPGEF5	-0.117552	3.31917	-1.99734	0.0484221	0.354601	-4.11276
ZNF710	-0.117595	3.77659	-2.43817	0.0164716	0.21495	-3.23558
USP42	-0.117686	4.26607	-2.47262	0.0150475	0.206363	-3.16047
PHOX2A	-0.118479	2.59656	-2.17666	0.031788	0.297278	-3.77499
LOC101559451	-0.120423	2.45535	-2.67372	0.00872326	0.161198	-2.70373
COL26A1	-0.12094	3.56582	-2.0681	0.0411333	0.332286	-3.98265
SDCCAG8	-0.12147	3.95872	-2.3525	0.0205459	0.238055	-3.4183
PIF1	-0.121631	2.51828	-2.33955	0.021234	0.242418	-3.44542
NSD1	-0.122271	3.86021	-2.59731	0.0107687	0.175207	-2.88094
LOC101928647	-0.122539	2.8271	-2.63544	0.00969934	0.169341	-2.79306
NLN	-0.122548	4.95686	-2.65134	0.00928247	0.165254	-2.75609
MPRIP	-0.122744	4.95648	-2.71632	0.0077424	0.155834	-2.60301
GPX2	-0.122876	2.61682	-2.04713	0.0431883	0.338111	-4.02164
CEBPZOS	-0.125058	3.01453	-1.99376	0.0488192	0.355874	-4.11925
CEP152	-0.125194	2.69944	-2.28971	0.0240749	0.259548	-3.54852
KIAA1328	-0.125232	2.9634	-2.39359	0.0184922	0.22523	-3.3314
CAMKMT	-0.126354	3.20424	-2.57672	0.0113894	0.179807	-2.92793
ZNF397	-0.12678	3.71545	-2.12988	0.0355607	0.312965	-3.86565
LOC200609	-0.126959	2.4641	-2.14657	0.0341726	0.308603	-3.83351
LIN9	-0.127667	3.25121	-3.28158	0.00140924	0.0758836	-1.14143
RBM33	-0.128015	3.75603	-2.61805	0.0101744	0.171659	-2.83326
MUC5AC	-0.128667	2.47554	-2.64825	0.00936213	0.16586	-2.76328
NACAD	-0.128716	2.42933	-2.60988	0.0104049	0.172558	-2.85209
SBF2-AS1	-0.128779	2.45583	-2.13592	0.0350528	0.310367	-3.85405
SIX3-AS1	-0.129075	2.42786	-2.45241	0.0158689	0.211399	-3.20464
MYRF	-0.131668	2.47127	-3.08312	0.0026283	0.0976189	-1.68045
SAMD4B	-0.132735	4.43616	-2.25445	0.0262824	0.27299	-3.62027
HSF1	-0.13292	4.58893	-2.12148	0.0362779	0.316977	-3.88174
NCAPH2	-0.133032	4.03199	-2.47319	0.0150251	0.206363	-3.15923
FOLH1B	-0.133849	2.42676	-1.98512	0.0497864	0.358708	-4.13481
WDR3	-0.133953	5.26905	-2.04979	0.0429228	0.33764	-4.01672
BUB1	-0.134363	2.59727	-2.62482	0.00998703	0.171342	-2.81764
KLHDC4	-0.13461	3.71501	-1.98942	0.0493026	0.356789	-4.12707
GPT	-0.135071	3.42529	-2.44322	0.0162556	0.213748	-3.22463
LOC101927886	-0.135343	2.40555	-2.6945	0.0082314	0.159499	-2.65476
TARS	-0.13547	5.58358	-2.02534	0.0454155	0.344704	-4.06177
DLX4	-0.135582	2.53535	-2.22528	0.0282399	0.283367	-3.67885
MTAP	-0.135586	2.93042	-2.17855	0.031643	0.297214	-3.77128
KIFC3	-0.135664	2.51208	-2.39492	0.0184286	0.225125	-3.32855
HIST1H2AL	-0.135995	2.69771	-2.94003	0.00405127	0.114994	-2.05196
STK38	-0.136233	3.83614	-3.03125	0.00307972	0.10357	-1.81681
DDA1	-0.136336	2.98614	-2.58756	0.0110586	0.177337	-2.90322
SMOX	-0.136356	3.50289	-2.44569	0.016151	0.212809	-3.21927
CEP89	-0.13661	3.62911	-2.48562	0.0145395	0.20437	-3.1319
LOC101929181	-0.136881	3.01229	-2.73895	0.00726309	0.151427	-2.54894
PRKAR1B	-0.137503	3.33169	-2.47263	0.0150471	0.206363	-3.16045
ZNF853	-0.138412	3.51563	-2.05899	0.0420154	0.334551	-3.99963
RNF8	-0.139452	4.28059	-2.53409	0.0127778	0.190568	-3.02417
LYRM2	-0.139647	4.59449	-2.48752	0.0144666	0.203892	-3.12771
C19orf82	-0.139711	2.91982	-2.52296	0.0131644	0.192947	-3.04906
ZNF544	-0.139787	5.25146	-2.22659	0.0281493	0.283335	-3.67623
CAPNS2	-0.140011	2.38244	-2.23201	0.0277775	0.282076	-3.6654
LOC101928545	-0.140163	2.4203	-2.20931	0.0293653	0.28769	-3.71064
SIKE1	-0.140799	3.99877	-2.26558	0.0255671	0.268697	-3.59773
ARL10	-0.14116	2.99698	-2.62277	0.0100434	0.171465	-2.82237
NCAN	-0.141541	2.39949	-2.00483	0.0476019	0.352951	-4.09919
DHX57	-0.141633	2.91933	-2.06438	0.0414915	0.333464	-3.98959
LRRC18	-0.142074	2.4916	-2.34631	0.0208722	0.23984	-3.43128
TCF20	-0.142297	4.84409	-2.42058	0.0172439	0.218751	-3.27357
DIAPH3	-0.142341	3.34629	-2.34928	0.0207152	0.238802	-3.42506
LINC00958	-0.143119	2.64498	-2.97211	0.0036813	0.110127	-1.96994
FBXO18	-0.143566	4.76602	-2.71605	0.00774833	0.155834	-2.60366
LOC100506282	-0.14376	4.0624	-2.597	0.0107778	0.175207	-2.88164
GRHL3	-0.143763	2.40038	-2.82328	0.00570577	0.134249	-2.34414
HSD17B12	-0.14525	4.31871	-2.81754	0.00580124	0.134989	-2.35826
ATP11A	-0.145283	3.30611	-2.92232	0.00426999	0.117664	-2.09693
WDR59	-0.145329	3.97111	-2.59495	0.0108383	0.175593	-2.88634
SLC35B4	-0.145359	4.00906	-2.08195	0.0398228	0.328041	-3.9567
LRFN1	-0.145761	3.41054	-2.03593	0.0443208	0.340742	-4.04231
RASGEF1C	-0.146105	2.40267	-2.43345	0.016676	0.215692	-3.24581
ZC3H18	-0.146254	3.47202	-2.15562	0.033439	0.305187	-3.81597
EXOSC2	-0.146446	3.80156	-2.26676	0.0254922	0.268437	-3.59533
TMEM223	-0.146821	4.17376	-2.56225	0.0118447	0.182687	-2.96076
RPRM	-0.14713	2.45623	-2.03738	0.0441726	0.340552	-4.03964
ZNF280B	-0.147177	2.4722	-2.07335	0.0406326	0.330545	-3.97283
TEAD2	-0.147423	3.83245	-2.019	0.0460826	0.346925	-4.07338
PRPF40A	-0.148208	6.70488	-2.29651	0.0236684	0.256789	-3.53456
NKX2-5	-0.150351	2.4318	-2.7764	0.00652902	0.142475	-2.45864
TSLP	-0.150822	2.43317	-2.01427	0.0465851	0.348656	-4.08202
DMPK	-0.151177	3.24033	-2.53314	0.0128102	0.190773	-3.02629
KLHL25	-0.151384	3.53791	-1.99547	0.0486288	0.355373	-4.11615
LPIN3	-0.15145	2.42424	-2.71347	0.00780464	0.155956	-2.60978
KCNK2	-0.152002	2.37682	-2.32186	0.0222066	0.247884	-3.48224
PPARGC1B	-0.152221	2.88188	-2.64308	0.00949691	0.16709	-2.77531
TCF3	-0.15223	5.08189	-2.68016	0.00856816	0.160447	-2.6886
TNFRSF10D	-0.152552	3.29848	-2.09652	0.038483	0.32267	-3.92922
MYBPC3	-0.152562	2.56006	-2.24259	0.0270634	0.277858	-3.64417
NHSL1	-0.152984	3.35255	-2.21125	0.0292262	0.287098	-3.70678
H2AFX	-0.153215	4.38628	-2.06984	0.0409664	0.331326	-3.97939
CNOT3	-0.154212	2.94116	-2.59898	0.0107196	0.174916	-2.8771
ZNF557	-0.154389	2.72971	-2.61129	0.0103647	0.172558	-2.84884
LOC101928973	-0.154529	3.25933	-2.37936	0.0191815	0.229797	-3.36163
DAP3	-0.154849	7.95717	-2.66081	0.009042	0.163587	-2.73398
HMGCS1	-0.155087	5.01624	-2.02716	0.045226	0.344276	-4.05843
NOXO1	-0.155116	2.48746	-2.19215	0.0306177	0.293717	-3.74457
REXO4	-0.156161	5.12853	-2.05599	0.0423097	0.335039	-4.00521
DLX6-AS1	-0.156234	2.4124	-2.21568	0.0289117	0.285517	-3.69798
POLR1B	-0.15628	5.86112	-2.49049	0.0143533	0.203098	-3.12116
POLR3G	-0.156366	2.93564	-2.56752	0.011677	0.181699	-2.94881
ZNF146	-0.156494	6.40988	-2.27379	0.0250502	0.265722	-3.58103
GUCA2A	-0.156549	2.94145	-2.41001	0.0177235	0.220913	-3.29628
HS3ST1	-0.156858	3.30902	-2.37978	0.0191611	0.229797	-3.36075
NUP62	-0.156904	4.38302	-2.22034	0.0285837	0.28427	-3.6887
GSTA1	-0.15703	2.90896	-2.19263	0.0305818	0.293715	-3.74362
AP1S1	-0.157412	3.70198	-2.35425	0.0204543	0.23796	-3.41462
RBM48	-0.157536	3.03886	-2.24689	0.0267781	0.275759	-3.63552
DUSP9	-0.157779	2.41637	-2.35473	0.0204294	0.23792	-3.41361
PRR7	-0.157781	2.60343	-2.3132	0.022697	0.25077	-3.50018
UCN3	-0.158818	2.50936	-3.56872	0.000546159	0.0479636	-0.314695
XPO4	-0.159122	3.29267	-2.55069	0.0122199	0.186182	-2.98685
RAD51	-0.15919	3.42134	-2.00212	0.0478973	0.353435	-4.10411
CELF4	-0.159505	2.43954	-3.63985	0.000428346	0.0438809	-0.101652
DUOXA1	-0.159729	2.5624	-3.50832	0.000669624	0.0507747	-0.493066
IPO9	-0.1602	4.68936	-2.19862	0.0301402	0.291461	-3.73181
ZC4H2	-0.160225	2.74546	-3.21703	0.00173096	0.0823727	-1.31971
RCOR2	-0.160838	2.77815	-2.12225	0.0362115	0.316785	-3.88027
CAPN10-AS1	-0.160841	2.96257	-2.03762	0.0441482	0.340552	-4.0392
RIOK3	-0.160949	6.02254	-2.18526	0.0311331	0.295476	-3.75811
TUSC8	-0.160998	2.79997	-2.229	0.0279835	0.28304	-3.67142
CCL17	-0.161147	2.70074	-2.07588	0.0403921	0.330412	-3.96808
LOC100507564	-0.161403	2.62038	-2.77045	0.00664109	0.142989	-2.47308
FAM167B	-0.161878	2.77461	-2.13483	0.0351439	0.310633	-3.85614
SLC12A9	-0.161918	3.7366	-2.81077	0.00591564	0.135702	-2.37486
RPL35A	-0.161945	8.09949	-2.65994	0.00906385	0.163838	-2.73601
2019-09-07	-0.162171	5.41239	-2.56051	0.0119004	0.183019	-2.96468
WDR12	-0.162421	4.47074	-2.66653	0.00889947	0.162735	-2.72059
CASKIN2	-0.162783	3.71491	-2.33074	0.0217133	0.245407	-3.46378
TUB	-0.162829	2.79282	-2.56826	0.0116536	0.181599	-2.94714
ZC3H15	-0.16318	6.79339	-2.40451	0.0179778	0.221383	-3.30807
IBA57	-0.163399	3.60278	-2.49375	0.0142296	0.20248	-3.11395
SLC35G1	-0.163417	2.47705	-3.01633	0.00322226	0.104506	-1.85568
DSTYK	-0.163945	3.84132	-2.67067	0.00879754	0.161594	-2.71088
DMRTA2	-0.164208	2.4276	-2.37593	0.0193513	0.230884	-3.36891
HYAL1	-0.16422	2.42492	-2.05158	0.0427445	0.337152	-4.01339
ATP5O	-0.164372	7.7019	-2.25449	0.0262793	0.27299	-3.62017
LOC389906	-0.164848	3.22659	-2.18093	0.0314614	0.296665	-3.76662
APBA1	-0.165041	2.57124	-2.44654	0.0161151	0.212809	-3.21742
KCTD15	-0.165051	3.8402	-2.03228	0.044696	0.342664	-4.04904
CCDC82	-0.165343	3.63571	-2.38452	0.018929	0.228241	-3.35069
LINC00853	-0.165574	2.48877	-2.19801	0.0301848	0.291527	-3.73301
PRKCQ-AS1	-0.165825	2.55645	-2.3169	0.0224859	0.249786	-3.49251
DDX28	-0.165983	3.53022	-2.44055	0.0163695	0.214164	-3.23042
TLE4	-0.166004	4.00241	-2.28861	0.0241416	0.259885	-3.55078
UTP11L	-0.166776	4.31717	-2.52398	0.0131285	0.192947	-3.04679
SREBF2	-0.166847	5.9301	-2.13746	0.0349242	0.310367	-3.85108
CAD	-0.167406	4.78523	-2.15623	0.03339	0.304876	-3.81479
C6orf123	-0.167787	2.50026	-2.61336	0.0103062	0.172558	-2.84408
TROVE2	-0.168202	6.01419	-2.5448	0.0124155	0.187487	-3.00013
HLA-F-AS1	-0.168212	2.98152	-2.57617	0.0114063	0.179807	-2.92917
ZNF292	-0.168231	5.41071	-2.20819	0.0294459	0.287745	-3.71287
C4BPA	-0.168326	2.4013	-2.22085	0.0285483	0.284209	-3.68769
DHX36	-0.168649	5.72243	-2.19842	0.0301546	0.291461	-3.7322
C7orf26	-0.168731	4.88471	-2.15689	0.0333377	0.304852	-3.81352
CTU2	-0.168743	3.90722	-3.02795	0.00311066	0.103834	-1.82541
DNAH14	-0.169176	3.02388	-2.67832	0.00861207	0.160447	-2.69291
RFC3	-0.169454	3.61267	-2.64721	0.00938928	0.166053	-2.76572
PDCD11	-0.170217	5.82031	-2.01314	0.0467058	0.349077	-4.08407
DNAJC2	-0.170546	4.99737	-2.14295	0.0344692	0.308804	-3.84049
BRCA2	-0.171264	2.71057	-2.84886	0.00529776	0.130013	-2.28099
MATN4	-0.171644	2.97777	-2.13131	0.0354401	0.312441	-3.86291
ZNF571-AS1	-0.17227	2.38646	-2.9414	0.0040348	0.114826	-2.04847
IL3RA	-0.173052	3.29038	-1.98441	0.0498675	0.358913	-4.1361
CNOT1	-0.17348	5.3799	-2.09707	0.0384331	0.322434	-3.92818
RRP1	-0.173794	5.77234	-2.568	0.0116617	0.181599	-2.94772
CDK10	-0.173861	5.45501	-2.0343	0.0444886	0.341714	-4.04533
RANBP1	-0.173933	4.77776	-3.5546	0.000572923	0.0490509	-0.356593
OBSCN	-0.174494	2.83646	-2.02555	0.0453941	0.344704	-4.06139
TCF25	-0.174814	6.91136	-2.26308	0.0257264	0.269532	-3.6028
C2orf82	-0.174831	2.44549	-2.41819	0.0173513	0.219432	-3.27871
WAC	-0.175439	6.45067	-2.17939	0.0315784	0.297214	-3.76963
PTMA	-0.175892	11.9213	-2.93147	0.00415566	0.116324	-2.07372
FAM20C	-0.176435	3.7446	-2.57316	0.0115	0.180316	-2.93602
MRPL47	-0.176601	5.92001	-2.61898	0.0101486	0.171659	-2.83113
LHX6	-0.17776	3.19157	-2.78497	0.00637088	0.140848	-2.43783
ZNF565	-0.177896	4.08184	-2.05638	0.0422711	0.334917	-4.00449
RCL1	-0.178901	4.29202	-2.01263	0.0467608	0.349077	-4.08501
ST3GAL4	-0.179739	3.81343	-2.7479	0.00708119	0.148916	-2.52746
AMOTL1	-0.180665	4.17073	-2.29358	0.0238431	0.257863	-3.54059
RRBP1	-0.181359	4.30217	-2.36917	0.0196897	0.233641	-3.38321
MGA	-0.182962	4.4308	-2.29436	0.0237964	0.257494	-3.53898
SKA3	-0.183753	4.08274	-2.00446	0.047642	0.352951	-4.09986
CLCN2	-0.183759	3.56513	-2.02718	0.0452246	0.344276	-4.05841
C1orf100	-0.183807	2.4085	-2.21169	0.0291954	0.286998	-3.70592
USB1	-0.183848	4.27647	-2.42062	0.0172422	0.218751	-3.27348
DTNA	-0.184116	3.15075	-2.112	0.0371019	0.318983	-3.89983
TAF5L	-0.184376	5.18614	-2.02597	0.0453502	0.344704	-4.06062
ECE2	-0.184909	3.08101	-2.49694	0.0141097	0.201474	-3.1069
ADORA1	-0.185524	3.8762	-2.30147	0.0233758	0.255511	-3.52436
ABCF2	-0.185662	4.3502	-2.19326	0.0305353	0.293615	-3.74238
PDE7A	-0.185898	3.99726	-2.04976	0.0429262	0.33764	-4.01678
KIAA1731	-0.18709	4.56501	-1.99352	0.048846	0.355943	-4.11968
SDAD1	-0.187641	4.67363	-2.18258	0.0313358	0.296163	-3.76337
FOXL1	-0.188158	2.47223	-2.84988	0.00528196	0.130013	-2.27844
KATNB1	-0.188763	4.14134	-2.14624	0.034199	0.308603	-3.83414
PYGB	-0.188984	4.81435	-2.27421	0.0250246	0.265722	-3.58019
RASAL2	-0.189101	4.10234	-3.07565	0.00268929	0.097922	-1.7002
FOXG1	-0.18934	2.49552	-2.05702	0.0422083	0.334873	-4.0033
CNTD2	-0.189926	3.52114	-2.46377	0.0154025	0.208512	-3.17986
FIP1L1	-0.190717	5.04354	-2.80546	0.0060069	0.136416	-2.38787
CREB3L2	-0.191525	4.86878	-2.13567	0.0350735	0.310367	-3.85452
PTPN2	-0.192271	4.16636	-4.23263	5.02217e-05	0.0174176	1.79212
NUCKS1	-0.192524	7.98307	-2.40693	0.0178655	0.221082	-3.30289
PLEKHG2	-0.193127	3.93635	-3.01786	0.00320732	0.104506	-1.85169
SLITRK5	-0.193747	2.47119	-2.31454	0.0226204	0.2506	-3.49741
UBQLN4	-0.193783	7.07425	-2.35762	0.0202794	0.2372	-3.40754
GPATCH11	-0.193975	4.19443	-2.20925	0.0293697	0.28769	-3.71076
TCP11L1	-0.194559	3.19569	-2.19926	0.0300934	0.29142	-3.73054
LOC101929122	-0.194707	2.52645	-2.34138	0.0211355	0.242283	-3.44159
CCDC59	-0.194729	8.33816	-2.06134	0.0417858	0.334113	-3.99525
KLC3	-0.195057	3.44151	-2.38826	0.0187475	0.227123	-3.34273
GRIP1	-0.195694	3.59928	-2.05929	0.0419864	0.33455	-3.99908
TANC1	-0.195843	4.95697	-2.02297	0.0456642	0.3453	-4.06612
RASIP1	-0.196074	3.52502	-2.09975	0.0381907	0.321588	-3.92309
RAD18	-0.196413	3.31843	-2.86579	0.00504251	0.127117	-2.23891
NGEF	-0.196488	3.88108	-2.18923	0.0308351	0.294134	-3.75031
RASAL1	-0.196541	2.76221	-3.63282	0.00043882	0.0442322	-0.122851
BRD7	-0.196587	4.79551	-2.40234	0.0180788	0.222313	-3.3127
FAM69B	-0.196784	3.16287	-2.49884	0.0140389	0.201023	-3.10271
DDX19A	-0.19727	4.12421	-3.0982	0.00250905	0.096323	-1.64044
TROAP	-0.197291	4.25083	-2.14458	0.0343352	0.308603	-3.83735
PHLPP1	-0.197707	3.24582	-2.26428	0.0256496	0.269288	-3.60036
FAM189B	-0.197885	4.84288	-2.18588	0.0310865	0.295171	-3.7569
NUFIP1	-0.198286	4.32632	-2.97323	0.00366894	0.110079	-1.96706
NDUFAF7	-0.198387	4.79759	-2.39925	0.0182238	0.223775	-3.31931
TFAM	-0.199088	5.32692	-2.29551	0.0237279	0.256889	-3.53662
LRP3	-0.199471	3.53212	-2.43244	0.0167197	0.215848	-3.24798
DMRT1	-0.199686	2.40568	-2.35385	0.0204755	0.23796	-3.41547
ANP32B	-0.199821	11.3715	-2.02594	0.0453532	0.344704	-4.06067
FAM212A	-0.200207	4.49707	-2.59511	0.0108334	0.175593	-2.88596
DDX6	-0.200348	6.48809	-2.45543	0.0157437	0.210784	-3.19806
AURKB	-0.200384	2.82164	-2.01168	0.0468627	0.349442	-4.08674
2019-09-04	-0.200476	3.01618	-3.51076	0.000664161	0.0507747	-0.485903
SF3B6	-0.20049	6.26275	-2.42693	0.0169617	0.217327	-3.2599
WDR74	-0.200527	5.17532	-2.41581	0.0174592	0.219576	-3.28384
RPS10	-0.200895	11.896	-2.13788	0.0348888	0.310367	-3.85026
ITGB4	-0.201598	3.12317	-3.26807	0.00147156	0.0772078	-1.17899
CHST2	-0.201602	3.83555	-2.14085	0.0346424	0.309127	-3.84454
KIAA1549	-0.201953	2.95469	-2.51578	0.0134193	0.194741	-3.06507
AGFG1	-0.201981	5.5592	-2.04588	0.0433133	0.338111	-4.02395
GNAS	-0.202088	8.17775	-2.62144	0.0100803	0.171465	-2.82546
KRBA1	-0.202255	5.43615	-2.1204	0.0363706	0.317092	-3.8838
ARHGAP22	-0.202388	2.51971	-2.70644	0.00796048	0.156452	-2.62649
LOC257152	-0.20338	2.65895	-2.04018	0.0438885	0.339783	-4.03449
ITGA9	-0.204086	3.43105	-2.31642	0.0225136	0.249959	-3.49352
ZNF567	-0.204113	4.33632	-2.05818	0.0420943	0.334873	-4.00113
CCNB2	-0.204211	4.03817	-2.68142	0.00853802	0.160447	-2.68562
POLR2C	-0.204587	6.01326	-2.03811	0.0440984	0.340506	-4.0383
FIRRE	-0.205165	2.51518	-2.0169	0.0463046	0.347273	-4.07721
GGA3	-0.205363	5.04746	-2.49025	0.0143624	0.203098	-3.12169
CTDNEP1	-0.205428	6.77655	-2.1369	0.034971	0.310367	-3.85216
RBM17	-0.20585	6.20058	-2.48943	0.0143938	0.203121	-3.12351
EHMT1	-0.206102	5.87524	-2.13746	0.0349245	0.310367	-3.85109
POLR2F	-0.20615	5.98985	-2.56547	0.011742	0.182404	-2.95347
QSOX2	-0.206384	3.08874	-2.47516	0.0149472	0.206363	-3.15491
DTNB	-0.206934	3.44294	-3.0047	0.00333754	0.105161	-1.88586
TMPRSS2	-0.206945	3.627	-2.11117	0.0371752	0.319077	-3.90142
ZCCHC14	-0.207314	4.43707	-2.47875	0.0148063	0.205689	-3.14703
MYL12B	-0.207345	12.1938	-2.42027	0.0172579	0.218792	-3.27424
GALK2	-0.20743	3.85092	-2.89743	0.00459565	0.122284	-2.15973
SUN1	-0.207703	5.20916	-3.03154	0.00307696	0.10357	-1.81604
SURF2	-0.208156	4.79147	-2.56525	0.011749	0.182404	-2.95397
TPM2	-0.208237	4.28136	-2.41125	0.0176667	0.220853	-3.29362
POLR2D	-0.208682	4.64527	-2.53128	0.0128745	0.191174	-3.03047
HOXA6	-0.208941	3.27469	-2.72411	0.00757437	0.153841	-2.58445
RFPL3S	-0.209356	2.46906	-2.84667	0.00533163	0.130186	-2.28641
NCS1	-0.209364	2.90261	-2.75593	0.00692141	0.146424	-2.50813
HEATR2	-0.209733	5.07523	-1.9893	0.0493169	0.356789	-4.1273
ZNF786	-0.210804	4.51994	-2.46693	0.015275	0.207679	-3.17295
TANK	-0.211458	5.17882	-2.34089	0.0211619	0.242345	-3.44262
CARHSP1	-0.211583	4.30514	-2.95412	0.00388471	0.113071	-2.01602
GAL3ST2	-0.213145	2.73015	-2.05499	0.042408	0.335428	-4.00707
MSL3	-0.213296	4.0775	-2.64445	0.00946097	0.166888	-2.77212
LINC00667	-0.213367	3.7186	-2.1894	0.0308222	0.294134	-3.74997
LOC642852	-0.213554	4.56434	-2.00034	0.0480921	0.353965	-4.10733
GTPBP8	-0.214254	5.29893	-2.38986	0.0186704	0.226528	-3.33932
COL11A2	-0.214372	3.70484	-3.40188	0.000953541	0.0616247	-0.801654
BLOC1S3	-0.214376	4.38209	-2.58771	0.0110543	0.177337	-2.90289
LMNA	-0.214732	6.73291	-2.26288	0.0257387	0.269532	-3.6032
PLD1	-0.214923	2.82818	-2.29262	0.0239004	0.258094	-3.54255
DESI2	-0.215017	4.42685	-2.8756	0.00489992	0.12486	-2.21445
TXNL4A	-0.215342	6.42902	-2.13946	0.0347583	0.30978	-3.84724
ADCY8	-0.215931	2.42098	-2.56079	0.0118914	0.183019	-2.96405
ACTN1	-0.216335	7.03417	-1.99473	0.0487114	0.355722	-4.11749
LOXL4	-0.217994	3.60807	-2.0576	0.0421518	0.334873	-4.00222
C16orf87	-0.220327	3.63262	-2.31563	0.0225582	0.250318	-3.49515
SNAPC3	-0.220332	4.08576	-2.23889	0.0273112	0.27995	-3.6516
EIF5B	-0.220743	7.00486	-2.04599	0.0433027	0.338111	-4.02376
GATAD2B	-0.221349	4.85425	-2.08536	0.0395056	0.326479	-3.95028
CHRM5	-0.221553	2.67785	-2.677	0.0086438	0.160644	-2.69601
PRB3	-0.222442	3.65958	-2.23224	0.0277618	0.282056	-3.66494
CCDC102A	-0.223025	2.54551	-2.11595	0.0367567	0.317916	-3.89231
JRKL	-0.223694	4.32135	-1.98996	0.0492424	0.356732	-4.1261
CWC27	-0.223812	6.56746	-2.01133	0.0469002	0.34948	-4.08738
RSU1	-0.224417	5.14623	-3.59491	0.000499606	0.0456381	-0.236628
TCOF1	-0.224568	3.98748	-3.1364	0.00222918	0.0917775	-1.53843
ZNF408	-0.224706	6.43669	-2.6502	0.00931181	0.165254	-2.75875
CENPJ	-0.225429	4.07845	-2.69643	0.00818721	0.159394	-2.65021
TGFA	-0.225596	2.77249	-2.3727	0.019512	0.232125	-3.37573
ZNF630	-0.226564	2.63301	-2.66606	0.0089112	0.162804	-2.7217
RCC1	-0.227115	5.09099	-2.15665	0.0333564	0.304852	-3.81398
TICRR	-0.227345	2.8768	-2.72399	0.00757687	0.153841	-2.58473
ASB6	-0.227572	4.8553	-2.14879	0.0339912	0.307892	-3.82922
CHRM1	-0.227917	2.45359	-2.9331	0.00413565	0.115923	-2.06959
SS18	-0.228234	4.42086	-2.5767	0.0113898	0.179807	-2.92796
RANBP17	-0.228292	3.4073	-3.59498	0.000499482	0.0456381	-0.23641
BARX1	-0.228473	2.44828	-2.64224	0.0095191	0.167337	-2.77728
TPR	-0.228595	6.05951	-2.05017	0.0428848	0.33764	-4.01601
PLCH1	-0.228822	2.98735	-2.69074	0.00831865	0.159789	-2.66366
CENPA	-0.22951	3.04291	-2.04733	0.0431678	0.338111	-4.02127
C12orf73	-0.22959	6.20822	-2.00071	0.0480523	0.353813	-4.10667
DARS2	-0.229672	2.76627	-2.82713	0.0056426	0.133478	-2.33467
RPS19	-0.23007	10.8162	-2.69255	0.00827667	0.159744	-2.65939
IL20RB	-0.230242	2.52016	-2.19225	0.0306099	0.293717	-3.74436
CENPO	-0.230487	3.22585	-2.58974	0.0109932	0.176836	-2.89824
CHD7	-0.230995	4.72551	-2.28014	0.0246571	0.263602	-3.56808
MFSD4	-0.231412	2.77651	-3.16084	0.0020656	0.0889676	-1.4726
EFNB3	-0.23221	2.60657	-2.77268	0.00659883	0.142989	-2.46766
DDX27	-0.232353	8.64325	-2.22308	0.0283928	0.283817	-3.68324
AFG3L2	-0.232518	6.86043	-2.43967	0.0164071	0.214346	-3.23233
SMARCB1	-0.232809	4.34902	-3.24173	0.00160054	0.0799519	-1.25185
LOC100507006	-0.23292	2.87712	-2.27979	0.0246786	0.263694	-3.5688
FBXO11	-0.233127	6.31942	-2.72581	0.00753793	0.153749	-2.58037
LOC284578	-0.233339	2.46916	-2.49791	0.0140734	0.201097	-3.10476
CWC22	-0.233561	7.27245	-2.17126	0.0322043	0.298986	-3.78553
SPTBN5	-0.233945	2.78833	-2.21795	0.0287518	0.284763	-3.69347
SLC26A7	-0.234056	2.59709	-2.26619	0.0255281	0.268437	-3.59648
ANKS6	-0.234124	2.58491	-4.22322	5.2042e-05	0.0174571	1.76049
TMEM177	-0.23423	4.13397	-2.70455	0.00800278	0.156701	-2.63097
SLC7A6	-0.234307	5.06211	-2.28856	0.0241443	0.259885	-3.55088
MAPRE2	-0.235442	3.92103	-2.51794	0.0133423	0.194125	-3.06027
[truncated: 847 more rows]
