# Supplementary material for: Identification of long-term survival-associated gene in breast cancer
Source: Aging (Albany NY). 2020 Oct 20;12(20):20332–49. doi: 10.18632/aging.103807 (PMC7655188; doi:10.18632/aging.103807)
Supplement: Supplementary Table 3 [file aging-12-103807-s004..xlsx]

## Sheet: Sheet1
Supplementary Table 3. Common genes were significantly related to the overall survival of breast cancer patients.
DEG	logFC	pValue
AAGAB	0.268408	0.00721015
ABAT	1.02779	0.000183987
ABCA3	0.48418	0.0467381
ABCC5	0.587325	0.0407083
ABCD3	0.372631	0.00832344
ABCG1	0.634502	0.0291398
ABHD2	0.549605	0.0147881
ABLIM3	0.657621	0.0488439
ABTB2	-0.257512	0.000755683
ACAA1	0.344654	0.000197059
ACOX2	0.845943	0.0471241
ACSS3	0.642303	0.0480326
ADRA2A	1.03769	0.00121664
AFF1	0.183989	0.0327517
AGBL2	0.534391	3.50821e-05
AGO2	-0.45128	0.0409022
AGPAT6	0.246567	0.00645626
AGR2	1.52366	0.00914675
AGR3	1.75224	0.00594376
AGTR1	1.42975	0.0102742
AHSA2	0.347144	0.00709542
ALCAM	0.616346	8.69691e-05
ALDH2	0.801037	0.0336612
ALDH3A2	0.637075	0.00120306
ALDH6A1	0.285232	0.00903347
ALX1	-0.0599641	0.00139688
ANAPC13	0.143281	0.0346566
ANKRD10	0.249017	0.0126063
ANKRD11	-0.323116	0.00020559
ANKRD30A	1.96229	0.00129154
ANKS1B	0.230831	0.00430058
ANKS6	-0.234124	0.0158789
ANXA9	0.966194	0.0164986
AP1AR	0.206932	0.00650323
APBA2	-0.568391	0.0441073
APBB2	0.57764	9.95216e-06
APOL1	0.759744	0.0337487
AQP8	-0.0225861	0.00440806
ARHGAP6	0.207589	0.0302
ARHGEF3	0.536738	0.0268303
ARID1A	0.214893	0.0297831
ARSG	0.932704	0.00245032
ASAH1	0.543766	4.03709e-05
ASPM	-0.799105	0.020775
ASS1	-0.955631	0.00249575
ASTN2	0.498174	0.000312632
ATAD1	0.357504	0.00152043
ATE1	0.122799	0.000364928
ATG16L1	0.538964	0.0255912
ATP6AP1	0.564356	0.0266498
ATP8B1	0.361295	0.00200059
ATPAF1	0.439018	0.0320677
AUP1	-0.324827	0.00136117
AURKA	-0.321268	0.0146978
AURKB	-0.200384	0.0243068
B4GALT2	-0.379954	0.00192965
BAIAP2L1	-0.846869	0.0120998
BBIP1	0.208955	0.00950026
BBS4	0.624497	0.00407427
BCL11A	-1.4488	0.00368607
BCL2	0.298252	0.00383436
BCL2L12	-0.366637	0.0239961
BLNK	0.623484	0.0344338
BNIP3L	0.370232	1.8106e-05
BRAP	0.186885	0.00515973
BRCA2	-0.171264	0.00343273
BRD7	-0.196587	0.0452588
BRI3	-0.377134	0.00298857
BRPF3	0.139301	0.0255204
BTF3	0.229191	3.6949e-05
BUB3	0.24	0.000979744
BYSL	-0.340858	6.10328e-05
BZW2	-0.301694	0.0345466
C10orf32	0.721202	0.0028796
C11orf58	0.217875	0.026542
C12orf73	-0.22959	0.0389915
C12orf76	0.16923	0.0036048
C16orf89	1.02034	0.0302826
C16orf95	-0.253265	0.00811209
C18orf21	-0.342152	0.015932
C1orf116	-0.678285	0.0317524
C1orf123	0.307485	0.00501826
C1orf168	0.699838	0.0324663
C1orf64	1.11795	0.00107627
C1orf74	-0.335403	0.0114292
C3orf52	0.531548	0.0126618
C4orf29	0.226025	0.000500236
C4orf33	0.0673836	0.0423361
C5orf34	-0.299988	0.0403548
C5orf46	-0.713587	0.00344011
C6orf120	0.322069	0.00486884
C9orf156	0.226667	0.00693948
C9orf64	0.40648	0.00012196
C9orf91	0.689929	0.0455078
CA12	1.30687	0.0183527
CACNA1D	0.928699	0.00365002
CACNA2D1	0.253199	0.00940273
CAD	-0.167406	0.00602965
CADPS2	1.07503	0.0372069
CALB2	-0.530642	0.0079865
CALML5	-1.48088	0.0419576
CAMLG	0.237009	0.00552435
CAPN12	-0.391683	0.0304661
CAPN7	0.260065	0.0065148
CASKIN2	-0.162783	7.33086e-05
CBS	-0.465595	0.00448301
CCAR2	0.17046	0.0015712
CCDC125	0.342713	0.0417598
CCDC28A	0.404525	0.024758
CCDC53	0.433588	0.00341623
CCDC59	-0.194729	0.0301769
CCNA2	-0.351535	0.0333931
CCNB2	-0.204211	0.0382341
CCNE1	-0.385435	0.000136044
CD24	-0.682975	0.00217673
CDC20	-1.00387	1.51552e-05
CDC42-IT1	0.340739	0.0311063
CDCA2	-0.384728	0.00644784
CDCA3	-0.557284	0.0380812
CDCA5	-0.546432	0.0125585
CDCA7	-1.03329	0.00264124
CDCA7L	-0.695123	0.035439
CDH3	-1.14323	0.00646104
CDK17	0.337622	0.00251456
CDON	0.151052	0.00725952
CDT1	-0.581086	8.94676e-05
CELSR1	0.435415	0.00228242
CELSR2	0.708447	0.0498184
CENPC	0.320491	0.031311
CENPF	-0.403902	0.0317457
CENPO	-0.230487	0.00151728
CENPW	-0.644131	0.00277457
CEP89	-0.13661	0.0110353
CERS5	0.140612	0.00595961
CETN3	0.353814	6.78508e-05
CGREF1	-0.443474	0.00267055
CHAD	0.40291	0.00843257
CHD7	-0.230995	0.00917583
CHM	0.140399	6.43385e-05
CHML	-0.253512	0.0138246
CHST3	-0.40732	0.00560214
CHURC1	0.47989	0.0053302
CIB2	-0.247232	0.00214017
CIRBP	0.666807	0.000647689
CIRH1A	-0.51634	0.0365593
CLASP2	0.316771	1.07959e-05
CLCN6	0.192502	0.00833497
CLSTN2	1.23126	0.000314972
CMTM6	0.195274	0.0242829
CNOT3	-0.154212	6.21184e-05
COL4A5	0.486057	0.00185051
COLEC11	-0.409065	0.00150615
COMTD1	-0.397331	4.72534e-05
COQ10A	0.576349	0.000162546
COQ5	0.370503	0.0147612
CPNE2	-0.825983	0.00774735
CREBL2	0.35164	0.0248185
CRIPAK	0.32199	0.00119762
CROT	0.406532	0.00346099
CRYZ	0.595928	0.0198312
CSNK1E	-0.300022	0.000329078
CSRNP2	0.209036	0.0357869
CTDSP2	0.24595	0.0166032
CTTN	-0.27381	0.000555738
CYB5A	0.732545	0.0486842
CYB5D2	0.359942	0.0308838
CYP2B7P	1.70287	0.000305239
CYP4B1	0.85041	0.0166907
CYP4V2	0.283489	1.36103e-05
DAP3	-0.154849	0.028408
DBI	-0.339592	0.0277787
DCLK1	0.644219	0.0111702
DCTN4	0.160964	0.0101878
DDAH1	0.132934	0.027088
DDX27	-0.232353	0.0381483
DDX39A	-0.471251	0.00126777
DEFB1	-0.951166	0.0194157
DEGS2	0.935971	0.0199062
DHCR24	0.921907	0.0238862
DIS3L	0.341586	0.0103397
DNAJC12	1.23225	0.00101593
DNALI1	1.12653	0.00216181
DNMT3A	-0.248805	2.32102e-05
DPP8	0.210812	0.0457303
DSC2	-1.20794	0.00220404
DTNB	-0.206934	0.0495873
DYNC1I2	0.282895	0.0376147
DYNC2H1	0.213969	0.00128426
DYNLL1-AS1	0.353575	0.0291079
DYNLT3	0.457856	0.00161918
DZIP3	0.27936	1.1512e-05
E2F3	-0.303383	0.00179376
ECE2	-0.184909	0.00423458
ECM2	0.467442	0.00181004
EDC4	-0.390442	8.29434e-06
EEA1	0.186706	0.0296677
EFHC1	0.379076	0.0210331
EFNA3	-0.415458	0.0122012
EFNA4	-0.669911	0.00871518
EFS	-0.694753	0.00278768
EGR3	0.849687	0.00290155
EIF3A	0.282409	0.000110889
EIF3B	-0.276956	0.000625759
EIF3H	0.374167	0.0417964
EIF4E3	0.306254	0.000394639
ELOVL5	0.381866	0.0481184
EMC3-AS1	-0.513768	0.00118009
ENPP4	0.652767	0.000447079
ENPP5	0.916793	8.69118e-05
EPB41L5	0.354946	0.0217084
EPHB3	-0.630691	0.0265811
ERAP1	0.242001	0.0039307
ERBB4	0.869266	0.000577692
ERMAP	0.246562	0.00151202
ESR1	0.507012	0.00128478
ETFDH	0.437201	0.00032856
EVL	1.46322	5.51065e-06
EXO1	-0.256322	0.000751851
EXOC6	0.281106	2.1005e-05
F12	-0.510224	0.0273287
F3	0.549937	0.00411163
FAAH2	0.527988	0.00361273
FAH	0.283893	0.0393864
FAHD2CP	-0.362069	0.0272743
FAM111A	0.236662	0.00945152
FAM111B	-0.338939	0.00759151
FAM114A2	0.222221	0.00391394
FAM120A	0.119614	0.000234376
FAM122B	0.461483	0.0109231
FAM160B1	0.144166	0.00347676
FAM175A	0.139956	0.0308783
FAM200B	0.209222	0.0316207
FAM204A	0.1791	0.00454851
FAM60A	-0.674384	0.000449008
FAM63A	0.272428	0.0106448
FAM64A	-0.515642	0.0173656
FAM69A	0.420396	0.00143415
FAM73A	0.253063	0.0145269
FAM83B	-0.588702	0.000465061
FANCA	-0.263497	0.0454354
FANCE	-0.396517	0.000267681
FANCI	-0.316483	0.0306625
FBP1	1.8598	0.00313269
FBXL16	0.612579	0.000991211
FBXL2	0.254779	0.00304645
FBXL5	0.493111	0.0030394
FBXL7	0.924836	0.016062
FBXO15	0.482263	0.0346617
FBXO21	0.292783	0.0163386
FBXO42	0.142868	0.038698
FBXO8	0.388826	0.00667568
FCN3	-0.245106	0.00692019
FDPS	-0.486179	0.00747671
FGD3	0.558767	0.00411396
FGD5-AS1	0.21317	0.00254156
FITM2	0.239655	0.0125081
FJX1	-0.490383	0.00512635
FLAD1	-0.388111	0.00721762
FLJ35934	0.308099	0.0362629
FLJ38379	0.85795	0.000295601
FLNB	0.676832	0.00397679
FMNL2	-0.448041	0.0136861
FOXA1	1.60152	0.000345519
FSD1L	0.217942	0.0167968
FUCA1	0.366867	0.00815764
FYCO1	0.169098	0.000860735
GATA3	1.78659	0.000920001
GATA3-AS1	1.19846	0.0282999
GDAP1	0.837384	0.00428309
GINS3	-0.272235	0.0122594
GLRB	0.606682	0.00995188
GLYATL2	-1.03299	0.0385318
GNG10	0.333328	0.000625975
GNPDA2	0.350899	0.000716666
GOLGA2P5	0.371833	0.0404125
GPC2	-0.376024	0.0375133
GPD1L	0.77398	0.000518983
GPR160	1.30071	0.0278131
GPR56	-0.256866	0.000785762
GPSM1	-0.312341	0.000360652
GPT2	-0.535325	0.013174
GRAMD1C	0.518529	0.0120885
GREB1	0.549984	0.000961915
GRIP1	-0.195694	0.0191991
GRK6	-0.304694	0.000376508
GRTP1	0.293183	0.0265325
GSTM1	0.623237	0.0334311
GSTM2	0.837198	0.0257491
GSTP1	-1.03592	0.0390478
GTSE1	-0.348962	0.00082642
GYLTL1B	-0.627483	0.00970347
H2AFX	-0.153215	0.00215823
H2BFXP	-0.333228	0.0045295
HADHB	0.305556	0.0115892
HAUS7	-0.357142	0.0259924
HCFC2	0.248196	0.00853823
HEATR2	-0.209733	0.0207346
HES4	-0.348868	0.00673846
HIPK1	0.157098	0.000368954
HKR1	0.151154	0.00438299
HMGCL	0.556504	0.0146195
HNRNPK	0.27269	0.0179477
HOOK1	0.513287	0.0314835
HPN	0.584251	0.0363156
HRCT1	-0.856212	0.0335163
HSD17B4	0.377853	4.37614e-05
HSPA12A	0.228937	0.0326595
HSPA2	0.951571	0.0266817
HTT	0.432323	0.000636636
ICE2	0.192356	0.0357997
IFT81	0.228238	0.00512891
IGBP1	0.31958	0.000316514
IGF1R	0.564078	0.000336542
IGFBP1	-0.039126	0.0165095
IGIP	0.242827	0.00198385
IKBKB	0.450444	0.00573407
IL6ST	0.514496	0.000106777
ING2	0.166096	0.0467817
INPP4B	0.692194	0.0231664
ITGB4	-0.201598	0.0487399
JADE2	0.298087	0.0243564
JMJD4	-0.241908	0.0016959
KAL1	0.636717	7.44462e-05
KANK2	0.201204	0.00839126
KANSL1	0.268795	0.00177553
KCND3	0.414442	0.00291539
KCNK6	0.498896	0.00903529
KCTD18	0.184932	0.000197888
KDM4B	0.396903	0.0384171
KHDRBS3	-0.658702	0.0137403
KIAA0319L	0.525059	0.00776526
KIAA0753	0.286476	0.00221269
KIAA1107	0.246346	0.00152781
KIAA1279	0.409648	0.0302456
KIAA1324	0.897672	0.000524902
KIAA1324L	0.54934	0.00199876
KIAA1328	-0.125232	0.00881425
KIAA1377	0.575632	0.00754215
KIAA1407	0.374143	0.00875979
KIAA1430	0.126996	0.00744489
KIAA1467	0.432508	0.00878709
KIAA1522	0.540778	0.0073355
KIAA1549	-0.201953	0.0456876
KIAA1598	0.656112	0.000308721
KIAA1614-AS1	-0.319157	0.0025021
KIF2C	-0.443105	0.0090178
KIF3A	0.490551	9.63822e-05
KIFC1	-0.448559	0.0032427
KLC3	-0.195057	0.0321009
KLF14	-0.0476629	0.0262404
KLHDC1	0.403097	1.80408e-06
KLHDC9	0.66111	0.0263348
KLHL17	-0.0764913	0.0141479
KLHL28	0.258724	0.00037089
KLHL5	0.341841	2.14319e-05
KRT80	-0.527055	0.00377863
KRTCAP2	-0.254512	0.00194546
LAD1	-0.42394	0.00164509
LAMTOR3	0.309129	0.00837435
LARP4	0.184878	0.0354064
LCOR	0.412338	0.000115791
LCORL	0.296555	0.00064531
LEO1	0.293818	0.0153874
LETMD1	0.465404	0.00534046
LIAS	0.25231	0.0180775
LIMA1	0.485893	0.00892018
LIN7A	0.449394	0.0194388
LIN9	-0.127667	0.00188251
LINC00173	0.582051	0.00389839
LINC00993	1.88975	5.38044e-05
LINC01137	0.619191	8.3836e-05
LINC01354	-0.331659	0.0148643
LMBRD1	0.254424	0.000170726
LMLN	0.225146	0.0234896
LNPEP	0.203662	3.75574e-05
LOC100288860	-0.466179	0.00200976
LOC100289092	-0.25344	0.0307128
LOC100507535	0.425576	0.0228688
LOC101926959	1.04275	0.00735103
LOC101927204	0.385444	0.00469323
LOC101927391	0.354347	0.00674279
LOC101929460	-0.0189102	0.0208588
LOC145837	0.563301	0.0035244
LOC283788	0.146119	0.000142194
LOC284837	-0.446155	0.020617
LOC390705	-0.0749566	0.0212305
LOC93622	0.457111	0.00526286
LOXL1-AS1	0.663271	0.0300066
LRBA	0.78175	0.000387024
LRIG2	0.11802	0.00164981
LRP2	1.09196	0.0498576
LRP3	-0.199471	9.46211e-05
LRP8	-0.573966	0.00919238
LSM7	-0.370588	0.00998608
LSR	-0.432496	0.000554152
LYPD6	0.33133	0.016553
MAGED2	0.665088	0.00434181
MAGI3	0.206582	5.85064e-05
MAGOHB	-0.258924	0.0324092
MAOA	0.58312	0.0168921
MAT2A	0.157666	0.0245492
MAT2B	0.185613	0.0266709
MBD6	0.282384	0.00850734
MCM10	-0.484863	0.000227833
MCM6	-0.239342	0.00489273
MDM2	0.149756	0.00267975
ME3	0.281721	0.0291305
MEAF6	0.424475	0.000388611
MED13L	0.445544	0.000795863
MEIS3	0.392794	0.00264971
MEX3A	-0.707	2.4501e-05
MGA	-0.182962	0.037228
MICAL2	0.384877	0.0131321
MINOS1	0.448879	0.00359322
MNX1	-0.39997	0.00471791
MORN5	-0.0941852	8.63271e-05
MOSPD2	0.208873	0.000686073
MPP3	0.361169	0.0112785
MPRIP	-0.122744	0.00892185
MPST	-0.386495	0.00061636
MPZL1	-0.346455	0.0164443
MR1	0.278934	0.0327005
MREG	0.754126	0.00202654
MRPL55	-0.242339	2.38363e-05
MS4A7	0.506479	0.00698274
MT1H	-0.508679	0.00976242
MT1HL1	-0.445562	0.0189729
MT1X	-0.715168	0.0179609
MTHFR	0.152976	0.021492
MTL5	0.399449	0.0495467
MXD3	-0.258117	2.42406e-05
MYB	0.830574	5.44755e-05
MYBL2	-0.731352	0.000362443
MYO5C	0.604446	0.000687045
MYOF	0.423801	0.000612203
MYRIP	0.424501	5.47254e-05
MYSM1	0.214099	0.00014307
N4BP2L1	0.103432	0.00581857
NAA10	-0.255946	0.00483587
NAPB	0.275186	1.82038e-05
NAT1	2.0308	0.000870822
NAT9	-0.361448	0.0480346
NAV3	0.282482	0.0307817
NBPF4	0.949333	0.00437575
NCAPD2	-0.55873	0.0322983
NCAPG	-0.588534	0.0308107
NDFIP1	0.388307	8.24396e-05
NDUFAF1	0.370953	0.00345837
NDUFAF2	-0.327461	0.000176022
NDUFV3	-0.319769	0.00136194
NEDD1	0.235758	0.0302866
NEGR1	0.192476	0.0486873
NEK5	0.598488	0.00941381
NEK9	0.198511	0.000500724
NELL2	1.1591	0.0324018
NFIA	0.357799	0.00476564
NGEF	-0.196488	0.00609202
NHLRC2	0.124675	0.0011478
NMB	-0.354301	0.00515479
NMNAT1	0.113336	0.00199834
NMT2	-0.384812	0.010042
NMU	-0.925227	0.00651719
NNT	0.201979	0.00175301
NOP2	-0.59078	0.00411865
NOVA1	0.6164	0.00217666
NPAS2	-0.309827	0.00703755
NPM3	-0.848264	0.00518893
NPNT	0.73468	0.00257384
NPY1R	1.55771	0.00668216
NRIP3	1.36857	1.66151e-06
NT5DC1	0.361	0.0105845
NUAK1	0.461416	0.0325474
NUP62	-0.156904	0.0160933
NUP93	-0.345005	0.00217213
NXF1	0.359918	0.0441325
NXN	-0.896923	0.000142188
NXPE3	0.388775	0.00122006
OBSCN	-0.174494	0.00448457
OR7E37P	-0.509149	0.012218
P4HTM	0.960791	0.00331245
PADI2	-0.515811	0.0103038
PAN2	0.515655	0.00113979
PAPD4	0.511676	2.77229e-06
PARD6B	0.416117	0.000601487
PATE1	-0.0636055	0.0485108
PAWR	0.259984	0.0346784
PBLD	0.248779	0.00748986
PCBP2	0.254304	0.00636008
PCGF5	0.215322	0.000552746
PCNXL4	0.0882133	0.00455396
PCP2	0.675528	0.002661
PCSK1N	-0.827629	0.0225972
PDAP1	-0.376407	0.00234378
PDCD11	-0.170217	0.0447574
PDE1A	0.113855	0.0348459
PDIK1L	0.530908	0.00282643
PELI2	0.171667	0.0148949
PER3	0.207457	0.00460046
PEX11A	0.296266	0.000505124
PGGT1B	0.353254	8.92579e-05
PHF19	-0.549904	0.0011468
PHF2	0.201942	0.0124304
PHGDH	-0.729575	0.0214464
PHYHD1	0.499156	0.0120813
PIGK	0.397187	0.000300236
PJA2	0.36267	0.000341059
PLA2G16	0.70036	0.0119434
PLCB4	-0.984513	0.00895073
PLCH1	-0.228822	0.00686341
PLEKHF2	0.573266	0.0376205
PLOD3	-0.392797	0.022911
PLSCR4	0.532603	0.0213437
PNMA1	0.4838	0.00651707
PNPLA4	0.664917	0.00222873
PNPO	0.405685	0.0386639
POLD1	-0.471162	0.0051869
POLI	0.547568	0.0405568
POLR2D	-0.208682	0.0189766
POLR3GL	0.441876	0.0200112
PPFIA1	-0.449441	0.016682
PPM1A	0.241691	0.0233184
PPP1R13L	-0.526706	0.00236601
PPP1R14B	-0.639813	0.00367758
PPP3CC	0.138402	0.0386074
PPP6C	0.301954	0.0446091
PRAME	-1.23693	0.000141721
PRDX3	0.429915	0.00128955
PRIM2	-0.237684	0.0109614
PRIMA1	-0.508577	0.0248379
PRIMPOL	0.592301	7.2212e-05
PRKAR1B	-0.137503	0.0020182
PRKCD	0.506452	0.0112663
PRMT1	-0.262665	0.00533934
PRR11	-0.259639	0.0140787
PRSS23	0.621186	0.008375
PSME4	-0.444042	0.030922
PTGER3	0.216321	0.0423352
PTGR1	0.501592	0.014878
PTP4A2	0.507067	0.0310386
PTPN14	-0.535224	0.012033
PYCR1	-0.302096	0.0166793
QDPR	0.362998	0.00590073
RAB11FIP1	0.694042	0.00736305
RAB11FIP2	0.486942	0.000194273
RAB21	0.21986	0.00391189
RAB27B	0.342314	0.00208074
RAB28	0.198257	0.0146368
RAB31	0.78118	0.00705545
RAB6B	-0.247793	0.0273413
RAD51	-0.15919	0.0320089
RAI2	0.835015	0.013963
RALBP1	-0.284571	0.0119925
RALGPS1	0.172987	0.0132245
RALGPS2	0.554035	0.00927774
RANBP17	-0.228292	0.0279207
RAP1B	0.390993	0.00109691
RARRES3	1.03161	0.00946059
RASA1	0.444947	0.00852253
RASEF	0.364991	0.0101165
RASGRF2	0.169455	0.00874013
RBM38	-0.355673	6.02429e-05
RBM47	0.32181	0.0113869
RCC1	-0.227115	0.00354286
RDH10	-0.512261	0.0293563
RECQL4	-0.419965	0.00320426
REEP3	0.275899	0.00155376
REPS2	0.845711	0.00151914
RET	0.773467	0.000388951
RGL2	0.467226	0.0249303
RHBDD2	0.366723	0.0178625
RHOV	-0.438771	0.033891
RIPK4	-0.419352	0.0135533
RNF103	0.299731	0.000930139
RNF141	0.211251	0.04483
RNF145	-0.626019	0.0326393
RNF34	0.217268	0.00378345
RNF8	-0.139452	0.0360619
RP9	-0.261224	0.00382666
RPS19	-0.23007	0.0315121
RPS21	-0.359607	0.035567
RPS6KB2	-0.421147	0.0224577
RRAS2	-0.493072	0.0143498
RRBP1	-0.181359	0.00557896
RRP1	-0.173794	0.00592062
RRP1B	-0.286189	0.00881736
RRP7A	-0.348908	0.00813873
RSU1	-0.224417	0.0192864
RTN1	1.0355	0.0024173
RUNDC1	0.36855	0.0102797
S100A10	-0.525059	0.0278008
S100A11	-0.474377	0.000378722
SALL2	0.462439	0.0363492
SAMD4B	-0.132735	0.046674
SCP2	0.424811	0.00272784
SDC1	-0.631211	0.00147884
SDSL	0.583198	0.044879
SEC14L2	0.363882	0.0309393
SEC62	0.251385	0.0377298
SEMA3C	0.490078	0.0157489
SEPSECS	0.228684	2.02213e-05
2019-09-08	0.268821	0.0118141
SERINC1	0.472688	0.00185417
SETD7	0.267429	0.0199692
SF3B3	-0.433433	8.51528e-05
SFXN2	0.486236	0.00599733
SH2D3A	-0.299531	0.00523566
SH3BGR	0.470645	0.00383099
SH3D19	0.23491	0.00288274
SHOC2	0.562714	1.72119e-05
SHQ1	0.421864	3.58729e-05
SIAH2	0.966315	0.00346541
SIDT1	1.13559	0.0164866
SIRT3	0.185584	0.0138671
SKA3	-0.183753	0.0339875
SLC12A6	0.142836	0.002517
SLC12A9	-0.161918	0.00469904
SLC16A6	0.951232	0.0261525
SLC1A4	0.477495	0.00665294
SLC22A5	0.303922	0.000893757
SLC25A14	0.288503	0.000164515
SLC25A40	0.167691	0.017121
SLC25A46	0.376846	0.000692648
SLC30A1	0.289693	0.0361611
SLC30A7	0.252894	0.00380905
SLC35D2	0.188153	0.00332819
SLC35E3	0.283877	0.00110405
SLC38A1	0.343256	0.00260687
SLC39A6	0.940563	0.00791045
SLC4A7	0.26535	0.0176019
SLC4A8	0.467722	0.027668
SLC6A6	0.117912	0.0392639
SLC7A5	-1.01858	0.0127939
SLC7A6	-0.234307	0.0488544
SLC7A6OS	-0.362805	0.0106451
SLK	0.432744	2.32347e-05
SMIM14	0.700645	0.0176462
SMOC2	0.572034	0.00729552
SMPDL3A	0.258517	0.000642755
SNAPC4	-0.261512	0.00375766
SNRK	0.205926	0.00244687
SNRNP70	0.249411	0.023921
SNX1	0.26305	0.0392681
SNX10	0.662515	0.0324275
SOX11	-1.34646	0.00011547
SOX4	-0.325061	0.000330693
SOX6	-0.242697	0.024272
SPATA2L	-0.311727	3.58057e-05
SPHK1	-0.592964	0.0234119
SPNS1	-0.35672	0.00189981
SRI	0.339413	0.0174037
SRPK1	-0.345779	0.000703308
SRR	0.238965	0.000255787
SSMEM1	-0.0568227	0.0333236
ST14	-0.279554	0.00405709
ST8SIA6-AS1	-1.3209	0.00153193
STAMBPL1	0.199141	0.0173758
STARD13	0.441345	0.0123202
STC2	1.25043	0.0415699
STIL	-0.539086	0.0111541
STK32B	0.83795	0.0261534
STXBP6	0.181566	0.029353
SUOX	0.262783	0.0408742
SUSD3	0.6605	2.50973e-05
SYDE1	-0.110571	0.0467572
SYNC	0.656681	0.00579722
SYT17	0.657887	0.0310917
SYTL2	0.908685	0.000250231
SYTL4	0.515236	0.000381395
SYTL5	0.283067	0.0240079
TAF11	-0.269116	0.00110635
TBC1D9	1.45102	6.41629e-05
TCEAL4	0.454202	0.00743913
TCF20	-0.142297	0.0063669
TCF3	-0.15223	0.00538024
TCOF1	-0.224568	0.00244208
TEAD4	-0.458088	0.00596044
TES	-0.419727	0.00555611
TESK2	0.572307	0.00368901
TFF1	1.50139	0.0119626
TGFB3	0.269298	0.0451955
TGFBR3	0.893921	0.00402636
THAP1	0.393246	0.0182483
THSD4	0.572334	0.00117572
THUMPD2	-0.294279	0.0324356
TIGD1	-0.624601	0.00165777
TLR3	0.216957	0.00264087
TMEM128	0.461821	0.043702
TMEM135	0.223636	0.000199235
TMEM167B	0.422633	0.00647606
TMEM170B	0.431949	0.017509
TMEM177	-0.23423	0.00692469
TMEM192	0.214654	0.00311391
TMEM245	0.2256	0.00192509
TMEM25	0.483382	0.026166
TMEM30B	0.462854	0.00057983
TMEM41B	0.643891	0.00241385
TMEM63C	0.356084	0.0234791
TMEM87B	0.528094	0.00133118
TNFRSF14	0.302099	0.0224876
TNFRSF19	0.342071	0.000160188
TNPO3	-0.337003	0.000761736
TOMM40	-0.251495	2.1345e-05
TOMM40L	-0.335674	0.0140745
TP53INP1	0.278358	3.09501e-06
TPBG	0.748873	0.0177262
TPGS2	-0.309417	0.0384253
TPPP3	0.401896	0.0132679
TPRG1	1.56236	0.0206305
TRAK2	0.334561	0.045825
TRERF1	0.387462	0.00562583
TRIB2	-0.489919	0.0159013
TRIM47	-0.562577	0.00690477
TRIM66	0.292861	0.0234657
TRMT10A	0.21849	0.00406505
TROAP	-0.197291	0.0498248
TRPV6	-0.296695	0.000188521
TSC22D4	-0.310135	0.0108903
TSPAN13	0.512884	0.0262927
TSPYL1	0.281938	0.0164972
TSPYL4	0.400271	0.000314798
TTC12	0.312244	0.00570409
TTC14	0.423484	0.000716407
TTC39A	0.322631	0.0367468
TTC6	0.610068	0.00124162
TTK	-0.881643	0.00263888
TTLL4	-0.364679	0.00366285
TUB	-0.162829	0.0037796
TXLNA	0.186074	0.0194243
UBAP2	-0.332761	0.0265231
UBE2C	-0.520018	0.0065804
UBE2S	-0.521853	0.00579048
UBL3	0.363278	2.55436e-06
UBP1	0.291377	0.0135504
UBXN10	0.404817	0.0471225
UBXN10-AS1	0.749454	0.0125355
UGCG	1.15487	1.2347e-05
ULK1	0.286848	0.00963249
UNC5A	0.42922	0.0458217
USP22	0.0897138	0.00298924
USP33	0.249295	0.00565647
USP42	-0.117686	0.00108542
VAPA	0.120882	0.0394101
VASP	-0.473942	0.00298123
VAV3	0.714834	7.11402e-05
VAX2	-0.24633	0.00169225
VPS4A	-0.281008	0.00035379
VPS72	-0.425018	0.00602313
WDR12	-0.162421	0.0377092
WDR19	0.298372	1.06239e-05
WDR52	0.443842	0.00115282
WDR6	0.143817	0.000614429
WDR7	0.215072	0.0197286
WIBG	0.209939	0.00834375
XBP1	0.624575	0.0318507
XPA	0.445869	0.000394247
YBX3	-0.502531	0.000551518
YDJC	-0.245565	0.000201947
YIPF1	0.446119	0.0409236
YPEL5	0.393959	0.0026925
ZC3H13	0.218696	0.00200622
ZC3H6	0.213745	0.00299377
ZCCHC24	0.608327	0.0287852
ZCCHC8	0.213253	0.0151258
ZDHHC17	0.289281	0.000406323
ZFYVE16	0.301144	9.48094e-05
ZIC1	-0.631559	0.00234024
ZMYND10	0.208215	0.00447208
ZMYND19	-0.508162	5.1335e-07
ZNF100	0.239173	0.00248574
ZNF133	-0.452376	0.000682963
ZNF180	0.148284	0.0155939
ZNF236	0.228688	0.029143
ZNF264	0.218035	0.0151652
ZNF30	0.375975	0.00345157
ZNF408	-0.224706	0.0276776
ZNF493	0.312398	0.00333465
ZNF500	0.336945	0.00212187
ZNF567	-0.204113	0.0236522
ZNF680	0.507555	0.00413948
ZNF71	-0.0848181	0.00998721
ZNF710	-0.117595	0.00106179
ZNF777	-0.11404	0.00261051
ZNF8	-0.332955	0.0129383
ZNF84	0.34607	0.0111822
