# Supplementary material for: Identification of long-term survival-associated gene in breast cancer
Source: Aging (Albany NY). 2020 Oct 20;12(20):20332–49. doi: 10.18632/aging.103807 (PMC7655188; doi:10.18632/aging.103807)
Supplement: Supplementary Table 4 [file aging-12-103807-s005..xlsx]

## Sheet: Table S4
Supplementary Table 4. The result of GO and KEGG pathway enrichment for 10 key genes.
ID	Description	GeneRatio	BgRatio	pvalue	p.adjust	qvalue	geneID	Count
GO:0097550	transcriptional preinitiation complex	2019-01-08	6/18678	0.00256746	0.0410794	0.013513	ESR1	1
GO:0000790	nuclear chromatin	2019-02-08	309/18678	0.00715177	0.0424399	0.0139605	GATA3/ESR1	2
GO:0035327	transcriptionally active chromatin	2019-01-08	22/18678	0.00938585	0.0424399	0.0139605	ESR1	1
GO:0030057	desmosome	2019-01-08	25/18678	0.0106597	0.0424399	0.0139605	DSC2	1
GO:0044454	nuclear chromosome part	2019-02-08	469/18678	0.0159355	0.0424399	0.0139605	GATA3/ESR1	2
GO:0000785	chromatin	2019-02-08	500/18678	0.0179935	0.0424399	0.0139605	GATA3/ESR1	2
GO:0001533	cornified envelope	2019-01-08	44/18678	0.0186945	0.0424399	0.0139605	DSC2	1
GO:0014704	intercalated disc	2019-01-08	50/18678	0.0212199	0.0424399	0.0139605	DSC2	1
GO:0000932	P-body	2019-01-08	63/18678	0.0266721	0.0473551	0.0155773	MEX3A	1
GO:0044291	cell-cell contact zone	2019-01-08	70/18678	0.0295969	0.0473551	0.0155773	DSC2	1
GO:0005913	cell-cell adherens junction	2019-01-08	79/18678	0.0333461	0.0485034	0.0159551	DSC2	1
GO:0036464	cytoplasmic ribonucleoprotein granule	2019-01-08	176/18678	0.0729562	0.0888643	0.0292317	MEX3A	1
GO:0032993	protein-DNA complex	2019-01-08	187/18678	0.0773571	0.0888643	0.0292317	ESR1	1
GO:0035770	ribonucleoprotein granule	2019-01-08	188/18678	0.0777563	0.0888643	0.0292317	MEX3A	1
GO:0005911	cell-cell junction	2019-01-08	414/18678	0.164186	0.175132	0.0576092	DSC2	1
GO:0005912	adherens junction	2019-01-08	496/18678	0.193745	0.193745	0.0637319	DSC2	1
GO:0060065	uterus development	2019-02-07	22/17913	3.01e-05	0.0165599	0.00717765	GATA3/ESR1	2
GO:0033598	mammary gland epithelial cell proliferation	2019-02-07	26/17913	4.24e-05	0.0165599	0.00717765	GATA3/ESR1	2
GO:0061180	mammary gland epithelium development	2019-02-07	67/17913	0.000285936	0.0235068	0.0101887	GATA3/ESR1	2
GO:0043627	response to estrogen	2019-02-07	73/17913	0.000339484	0.0235068	0.0101887	GATA3/ESR1	2
GO:1905277	negative regulation of epithelial tube formation	2019-01-07	1/17913	0.000390778	0.0235068	0.0101887	GATA3	1
GO:2000606	regulation of cell proliferation involved in mesonephros development	2019-01-07	1/17913	0.000390778	0.0235068	0.0101887	GATA3	1
GO:2000607	negative regulation of cell proliferation involved in mesonephros development	2019-01-07	1/17913	0.000390778	0.0235068	0.0101887	GATA3	1
GO:2000699	fibroblast growth factor receptor signaling pathway involved in ureteric bud formation	2019-01-07	1/17913	0.000390778	0.0235068	0.0101887	GATA3	1
GO:2000701	glial cell-derived neurotrophic factor receptor signaling pathway involved in ureteric bud formation	2019-01-07	1/17913	0.000390778	0.0235068	0.0101887	GATA3	1
GO:2000702	regulation of fibroblast growth factor receptor signaling pathway involved in ureteric bud formation	2019-01-07	1/17913	0.000390778	0.0235068	0.0101887	GATA3	1
GO:2000703	negative regulation of fibroblast growth factor receptor signaling pathway involved in ureteric bud formation	2019-01-07	1/17913	0.000390778	0.0235068	0.0101887	GATA3	1
GO:2000733	regulation of glial cell-derived neurotrophic factor receptor signaling pathway involved in ureteric bud formation	2019-01-07	1/17913	0.000390778	0.0235068	0.0101887	GATA3	1
GO:2000734	negative regulation of glial cell-derived neurotrophic factor receptor signaling pathway involved in ureteric bud formation	2019-01-07	1/17913	0.000390778	0.0235068	0.0101887	GATA3	1
GO:0002572	pro-T cell differentiation	2019-01-07	2/17913	0.000781424	0.0305332	0.0132342	GATA3	1
GO:0060995	cell-cell signaling involved in kidney development	2019-01-07	2/17913	0.000781424	0.0305332	0.0132342	GATA3	1
GO:0061289	Wnt signaling pathway involved in kidney development	2019-01-07	2/17913	0.000781424	0.0305332	0.0132342	GATA3	1
GO:0061290	canonical Wnt signaling pathway involved in metanephric kidney development	2019-01-07	2/17913	0.000781424	0.0305332	0.0132342	GATA3	1
GO:0072204	cell-cell signaling involved in metanephros development	2019-01-07	2/17913	0.000781424	0.0305332	0.0132342	GATA3	1
GO:2000683	regulation of cellular response to X-ray	2019-01-07	2/17913	0.000781424	0.0305332	0.0132342	GATA3	1
GO:0001806	type IV hypersensitivity	2019-01-07	3/17913	0.00117194	0.0305332	0.0132342	GATA3	1
GO:0006679	glucosylceramide biosynthetic process	2019-01-07	3/17913	0.00117194	0.0305332	0.0132342	UGCG	1
GO:0035898	parathyroid hormone secretion	2019-01-07	3/17913	0.00117194	0.0305332	0.0132342	GATA3	1
GO:0060523	prostate epithelial cord elongation	2019-01-07	3/17913	0.00117194	0.0305332	0.0132342	ESR1	1
GO:1901536	negative regulation of DNA demethylation	2019-01-07	3/17913	0.00117194	0.0305332	0.0132342	GATA3	1
GO:1903575	cornified envelope assembly	2019-01-07	3/17913	0.00117194	0.0305332	0.0132342	UGCG	1
GO:2000611	positive regulation of thyroid hormone generation	2019-01-07	3/17913	0.00117194	0.0305332	0.0132342	GATA3	1
GO:0008584	male gonad development	2019-02-07	137/17913	0.00118916	0.0305332	0.0132342	GATA3/ESR1	2
GO:0030879	mammary gland development	2019-02-07	138/17913	0.00120642	0.0305332	0.0132342	GATA3/ESR1	2
GO:0046546	development of primary male sexual characteristics	2019-02-07	138/17913	0.00120642	0.0305332	0.0132342	GATA3/ESR1	2
GO:0006338	chromatin remodeling	2019-02-07	156/17913	0.00153779	0.0305332	0.0132342	GATA3/ESR1	2
GO:0033600	negative regulation of mammary gland epithelial cell proliferation	2019-01-07	4/17913	0.00156233	0.0305332	0.0132342	GATA3	1
GO:0035799	ureter maturation	2019-01-07	4/17913	0.00156233	0.0305332	0.0132342	GATA3	1
GO:0060737	prostate gland morphogenetic growth	2019-01-07	4/17913	0.00156233	0.0305332	0.0132342	ESR1	1
GO:0060750	epithelial cell proliferation involved in mammary gland duct elongation	2019-01-07	4/17913	0.00156233	0.0305332	0.0132342	ESR1	1
GO:0061209	cell proliferation involved in mesonephros development	2019-01-07	4/17913	0.00156233	0.0305332	0.0132342	GATA3	1
GO:0061218	negative regulation of mesonephros development	2019-01-07	4/17913	0.00156233	0.0305332	0.0132342	GATA3	1
GO:0071442	positive regulation of histone H3-K14 acetylation	2019-01-07	4/17913	0.00156233	0.0305332	0.0132342	GATA3	1
GO:0072106	regulation of ureteric bud formation	2019-01-07	4/17913	0.00156233	0.0305332	0.0132342	GATA3	1
GO:0072107	positive regulation of ureteric bud formation	2019-01-07	4/17913	0.00156233	0.0305332	0.0132342	GATA3	1
GO:1905278	positive regulation of epithelial tube formation	2019-01-07	4/17913	0.00156233	0.0305332	0.0132342	GATA3	1
GO:0046661	male sex differentiation	2019-02-07	160/17913	0.00161672	0.0305332	0.0132342	GATA3/ESR1	2
GO:0051897	positive regulation of protein kinase B signaling	2019-02-07	173/17913	0.00188642	0.0305332	0.0132342	GATA3/ESR1	2
GO:0042421	norepinephrine biosynthetic process	2019-01-07	5/17913	0.00195258	0.0305332	0.0132342	GATA3	1
GO:0060374	mast cell differentiation	2019-01-07	5/17913	0.00195258	0.0305332	0.0132342	GATA3	1
GO:0060751	branch elongation involved in mammary gland duct branching	2019-01-07	5/17913	0.00195258	0.0305332	0.0132342	ESR1	1
GO:0072179	nephric duct formation	2019-01-07	5/17913	0.00195258	0.0305332	0.0132342	GATA3	1
GO:0072602	interleukin-4 secretion	2019-01-07	5/17913	0.00195258	0.0305332	0.0132342	GATA3	1
GO:2000609	regulation of thyroid hormone generation	2019-01-07	5/17913	0.00195258	0.0305332	0.0132342	GATA3	1
GO:1905330	regulation of morphogenesis of an epithelium	2019-02-07	181/17913	0.00206236	0.0305332	0.0132342	GATA3/ESR1	2
GO:0006002	fructose 6-phosphate metabolic process	2019-01-07	6/17913	0.0023427	0.0305332	0.0132342	FBP1	1
GO:0045899	positive regulation of RNA polymerase II transcriptional preinitiation complex assembly	2019-01-07	6/17913	0.0023427	0.0305332	0.0132342	ESR1	1
GO:0060526	prostate glandular acinus morphogenesis	2019-01-07	6/17913	0.0023427	0.0305332	0.0132342	ESR1	1
GO:0060527	prostate epithelial cord arborization involved in prostate glandular acinus morphogenesis	2019-01-07	6/17913	0.0023427	0.0305332	0.0132342	ESR1	1
GO:0060676	ureteric bud formation	2019-01-07	6/17913	0.0023427	0.0305332	0.0132342	GATA3	1
GO:0060745	mammary gland branching involved in pregnancy	2019-01-07	6/17913	0.0023427	0.0305332	0.0132342	ESR1	1
GO:0071440	regulation of histone H3-K14 acetylation	2019-01-07	6/17913	0.0023427	0.0305332	0.0132342	GATA3	1
GO:0086073	bundle of His cell-Purkinje myocyte adhesion involved in cell communication	2019-01-07	6/17913	0.0023427	0.0305332	0.0132342	DSC2	1
GO:1901723	negative regulation of cell proliferation involved in kidney development	2019-01-07	6/17913	0.0023427	0.0305332	0.0132342	GATA3	1
GO:2000664	positive regulation of interleukin-5 secretion	2019-01-07	6/17913	0.0023427	0.0305332	0.0132342	GATA3	1
GO:2000667	positive regulation of interleukin-13 secretion	2019-01-07	6/17913	0.0023427	0.0305332	0.0132342	GATA3	1
GO:0060017	parathyroid gland development	2019-01-07	7/17913	0.0027327	0.031895	0.0138245	GATA3	1
GO:0060687	regulation of branching involved in prostate gland morphogenesis	2019-01-07	7/17913	0.0027327	0.031895	0.0138245	ESR1	1
GO:0071286	cellular response to magnesium ion	2019-01-07	7/17913	0.0027327	0.031895	0.0138245	FBP1	1
GO:0072197	ureter morphogenesis	2019-01-07	7/17913	0.0027327	0.031895	0.0138245	GATA3	1
GO:0086042	cardiac muscle cell-cardiac muscle cell adhesion	2019-01-07	7/17913	0.0027327	0.031895	0.0138245	DSC2	1
GO:1901535	regulation of DNA demethylation	2019-01-07	7/17913	0.0027327	0.031895	0.0138245	GATA3	1
GO:2000553	positive regulation of T-helper 2 cell cytokine production	2019-01-07	7/17913	0.0027327	0.031895	0.0138245	GATA3	1
GO:0042445	hormone metabolic process	2019-02-07	215/17913	0.00289406	0.0321295	0.0139261	GATA3/ESR1	2
GO:0008406	gonad development	2019-02-07	217/17913	0.00294718	0.0321295	0.0139261	GATA3/ESR1	2
GO:0045137	development of primary sexual characteristics	2019-02-07	223/17913	0.00310931	0.0321295	0.0139261	GATA3/ESR1	2
GO:0001547	antral ovarian follicle growth	2019-01-07	8/17913	0.00312256	0.0321295	0.0139261	ESR1	1
GO:0044154	histone H3-K14 acetylation	2019-01-07	8/17913	0.00312256	0.0321295	0.0139261	GATA3	1
GO:0046476	glycosylceramide biosynthetic process	2019-01-07	8/17913	0.00312256	0.0321295	0.0139261	UGCG	1
GO:0072603	interleukin-5 secretion	2019-01-07	8/17913	0.00312256	0.0321295	0.0139261	GATA3	1
GO:2000617	positive regulation of histone H3-K9 acetylation	2019-01-07	8/17913	0.00312256	0.0321295	0.0139261	GATA3	1
GO:2000662	regulation of interleukin-5 secretion	2019-01-07	8/17913	0.00312256	0.0321295	0.0139261	GATA3	1
GO:0048863	stem cell differentiation	2019-02-07	237/17913	0.00350373	0.0328094	0.0142208	GATA3/ESR1	2
GO:0002524	hypersensitivity	2019-01-07	9/17913	0.00351229	0.0328094	0.0142208	GATA3	1
GO:0006678	glucosylceramide metabolic process	2019-01-07	9/17913	0.00351229	0.0328094	0.0142208	UGCG	1
GO:0035860	glial cell-derived neurotrophic factor receptor signaling pathway	2019-01-07	9/17913	0.00351229	0.0328094	0.0142208	GATA3	1
GO:0045898	regulation of RNA polymerase II transcriptional preinitiation complex assembly	2019-01-07	9/17913	0.00351229	0.0328094	0.0142208	ESR1	1
GO:0060736	prostate gland growth	2019-01-07	9/17913	0.00351229	0.0328094	0.0142208	ESR1	1
GO:0072172	mesonephric tubule formation	2019-01-07	9/17913	0.00351229	0.0328094	0.0142208	GATA3	1
GO:0051896	regulation of protein kinase B signaling	2019-02-07	241/17913	0.00362054	0.0328094	0.0142208	GATA3/ESR1	2
GO:2000027	regulation of organ morphogenesis	2019-02-07	250/17913	0.00389004	0.0328094	0.0142208	GATA3/ESR1	2
GO:0033210	leptin-mediated signaling pathway	2019-01-07	10/17913	0.00390189	0.0328094	0.0142208	UGCG	1
GO:0042415	norepinephrine metabolic process	2019-01-07	10/17913	0.00390189	0.0328094	0.0142208	GATA3	1
GO:0060068	vagina development	2019-01-07	10/17913	0.00390189	0.0328094	0.0142208	ESR1	1
GO:0060525	prostate glandular acinus development	2019-01-07	10/17913	0.00390189	0.0328094	0.0142208	ESR1	1
GO:0061085	regulation of histone H3-K27 methylation	2019-01-07	10/17913	0.00390189	0.0328094	0.0142208	GATA3	1
GO:0071481	cellular response to X-ray	2019-01-07	10/17913	0.00390189	0.0328094	0.0142208	GATA3	1
GO:1903799	negative regulation of production of miRNAs involved in gene silencing by miRNA	2019-01-07	10/17913	0.00390189	0.0328094	0.0142208	ESR1	1
GO:2000665	regulation of interleukin-13 secretion	2019-01-07	10/17913	0.00390189	0.0328094	0.0142208	GATA3	1
GO:0016579	protein deubiquitination	2019-02-07	260/17913	0.00420026	0.0342433	0.0148423	GATA3/ESR1	2
GO:0035457	cellular response to interferon-alpha	2019-01-07	11/17913	0.00429136	0.0342433	0.0148423	GATA3	1
GO:0072611	interleukin-13 secretion	2019-01-07	11/17913	0.00429136	0.0342433	0.0148423	GATA3	1
GO:2000551	regulation of T-helper 2 cell cytokine production	2019-01-07	11/17913	0.00429136	0.0342433	0.0148423	GATA3	1
GO:2000615	regulation of histone H3-K9 acetylation	2019-01-07	11/17913	0.00429136	0.0342433	0.0148423	GATA3	1
GO:0043491	protein kinase B signaling	2019-02-07	268/17913	0.00445655	0.0351047	0.0152157	GATA3/ESR1	2
GO:0007548	sex differentiation	2019-02-07	269/17913	0.0044891	0.0351047	0.0152157	GATA3/ESR1	2
GO:0070646	protein modification by small protein removal	2019-02-07	273/17913	0.00462039	0.035537	0.015403	GATA3/ESR1	2
GO:0060442	branching involved in prostate gland morphogenesis	2019-01-07	12/17913	0.0046807	0.035537	0.015403	ESR1	1
GO:0072178	nephric duct morphogenesis	2019-01-07	12/17913	0.0046807	0.035537	0.015403	GATA3	1
GO:0032754	positive regulation of interleukin-5 production	2019-01-07	13/17913	0.00506991	0.0367099	0.0159114	GATA3	1
GO:0035745	T-helper 2 cell cytokine production	2019-01-07	13/17913	0.00506991	0.0367099	0.0159114	GATA3	1
GO:0043970	histone H3-K9 acetylation	2019-01-07	13/17913	0.00506991	0.0367099	0.0159114	GATA3	1
GO:0045820	negative regulation of glycolytic process	2019-01-07	13/17913	0.00506991	0.0367099	0.0159114	FBP1	1
GO:0072182	regulation of nephron tubule epithelial cell differentiation	2019-01-07	13/17913	0.00506991	0.0367099	0.0159114	GATA3	1
GO:0045064	T-helper 2 cell differentiation	2019-01-07	14/17913	0.00545899	0.0368797	0.015985	GATA3	1
GO:0051123	RNA polymerase II transcriptional preinitiation complex assembly	2019-01-07	14/17913	0.00545899	0.0368797	0.015985	ESR1	1
GO:0060261	positive regulation of transcription initiation from RNA polymerase II promoter	2019-01-07	14/17913	0.00545899	0.0368797	0.015985	ESR1	1
GO:0071391	cellular response to estrogen stimulus	2019-01-07	14/17913	0.00545899	0.0368797	0.015985	ESR1	1
GO:0086069	bundle of His cell to Purkinje myocyte communication	2019-01-07	14/17913	0.00545899	0.0368797	0.015985	DSC2	1
GO:1901722	regulation of cell proliferation involved in kidney development	2019-01-07	14/17913	0.00545899	0.0368797	0.015985	GATA3	1
GO:0030216	keratinocyte differentiation	2019-02-07	298/17913	0.00548136	0.0368797	0.015985	UGCG/DSC2	2
GO:0030812	negative regulation of nucleotide catabolic process	2019-01-07	15/17913	0.00584794	0.0368797	0.015985	FBP1	1
GO:0032352	positive regulation of hormone metabolic process	2019-01-07	15/17913	0.00584794	0.0368797	0.015985	GATA3	1
GO:0032736	positive regulation of interleukin-13 production	2019-01-07	15/17913	0.00584794	0.0368797	0.015985	GATA3	1
GO:0033599	regulation of mammary gland epithelial cell proliferation	2019-01-07	15/17913	0.00584794	0.0368797	0.015985	GATA3	1
GO:0051198	negative regulation of coenzyme metabolic process	2019-01-07	15/17913	0.00584794	0.0368797	0.015985	FBP1	1
GO:0071599	otic vesicle development	2019-01-07	15/17913	0.00584794	0.0368797	0.015985	GATA3	1
GO:0072160	nephron tubule epithelial cell differentiation	2019-01-07	15/17913	0.00584794	0.0368797	0.015985	GATA3	1
GO:0098856	intestinal lipid absorption	2019-01-07	15/17913	0.00584794	0.0368797	0.015985	UGCG	1
GO:1905276	regulation of epithelial tube formation	2019-01-07	15/17913	0.00584794	0.0368797	0.015985	GATA3	1
GO:0060562	epithelial tube morphogenesis	2019-02-07	313/17913	0.00603108	0.037107	0.0160835	GATA3/ESR1	2
GO:0002830	positive regulation of type 2 immune response	2019-01-07	16/17913	0.00623676	0.037107	0.0160835	GATA3	1
GO:0006590	thyroid hormone generation	2019-01-07	16/17913	0.00623676	0.037107	0.0160835	GATA3	1
GO:0060965	negative regulation of gene silencing by miRNA	2019-01-07	16/17913	0.00623676	0.037107	0.0160835	ESR1	1
GO:0072176	nephric duct development	2019-01-07	16/17913	0.00623676	0.037107	0.0160835	GATA3	1
GO:0072189	ureter development	2019-01-07	16/17913	0.00623676	0.037107	0.0160835	GATA3	1
GO:2001170	negative regulation of ATP biosynthetic process	2019-01-07	16/17913	0.00623676	0.037107	0.0160835	FBP1	1
GO:0001655	urogenital system development	2019-02-07	324/17913	0.00644985	0.037107	0.0160835	GATA3/ESR1	2
GO:0030540	female genitalia development	2019-01-07	17/17913	0.00662544	0.037107	0.0160835	ESR1	1
GO:0040037	negative regulation of fibroblast growth factor receptor signaling pathway	2019-01-07	17/17913	0.00662544	0.037107	0.0160835	GATA3	1
GO:0090185	negative regulation of kidney development	2019-01-07	17/17913	0.00662544	0.037107	0.0160835	GATA3	1
GO:1905331	negative regulation of morphogenesis of an epithelium	2019-01-07	17/17913	0.00662544	0.037107	0.0160835	GATA3	1
GO:0030809	negative regulation of nucleotide biosynthetic process	2019-01-07	18/17913	0.007014	0.037107	0.0160835	FBP1	1
GO:0044320	cellular response to leptin stimulus	2019-01-07	18/17913	0.007014	0.037107	0.0160835	UGCG	1
GO:0060749	mammary gland alveolus development	2019-01-07	18/17913	0.007014	0.037107	0.0160835	ESR1	1
GO:0061377	mammary gland lobule development	2019-01-07	18/17913	0.007014	0.037107	0.0160835	ESR1	1
GO:1900372	negative regulation of purine nucleotide biosynthetic process	2019-01-07	18/17913	0.007014	0.037107	0.0160835	FBP1	1
GO:0009913	epidermal cell differentiation	2019-02-07	346/17913	0.0073267	0.037107	0.0160835	UGCG/DSC2	2
GO:0002726	positive regulation of T cell cytokine production	2019-01-07	19/17913	0.00740243	0.037107	0.0160835	GATA3	1
GO:0003215	cardiac right ventricle morphogenesis	2019-01-07	19/17913	0.00740243	0.037107	0.0160835	GATA3	1
GO:0006677	glycosylceramide metabolic process	2019-01-07	19/17913	0.00740243	0.037107	0.0160835	UGCG	1
GO:0009713	catechol-containing compound biosynthetic process	2019-01-07	19/17913	0.00740243	0.037107	0.0160835	GATA3	1
GO:0032026	response to magnesium ion	2019-01-07	19/17913	0.00740243	0.037107	0.0160835	FBP1	1
GO:0042403	thyroid hormone metabolic process	2019-01-07	19/17913	0.00740243	0.037107	0.0160835	GATA3	1
GO:0042423	catecholamine biosynthetic process	2019-01-07	19/17913	0.00740243	0.037107	0.0160835	GATA3	1
GO:0045061	thymic T cell selection	2019-01-07	19/17913	0.00740243	0.037107	0.0160835	GATA3	1
GO:0060149	negative regulation of posttranscriptional gene silencing	2019-01-07	19/17913	0.00740243	0.037107	0.0160835	ESR1	1
GO:0060967	negative regulation of gene silencing by RNA	2019-01-07	19/17913	0.00740243	0.037107	0.0160835	ESR1	1
GO:0072079	nephron tubule formation	2019-01-07	19/17913	0.00740243	0.037107	0.0160835	GATA3	1
GO:0098911	regulation of ventricular cardiac muscle cell action potential	2019-01-07	19/17913	0.00740243	0.037107	0.0160835	DSC2	1
GO:1903798	regulation of production of miRNAs involved in gene silencing by miRNA	2019-01-07	19/17913	0.00740243	0.037107	0.0160835	ESR1	1
GO:2000696	regulation of epithelial cell differentiation involved in kidney development	2019-01-07	19/17913	0.00740243	0.037107	0.0160835	GATA3	1
GO:0002320	lymphoid progenitor cell differentiation	2019-01-07	20/17913	0.00779072	0.0372185	0.0161319	GATA3	1
GO:0002438	acute inflammatory response to antigenic stimulus	2019-01-07	20/17913	0.00779072	0.0372185	0.0161319	GATA3	1
GO:0060231	mesenchymal to epithelial transition	2019-01-07	20/17913	0.00779072	0.0372185	0.0161319	GATA3	1
GO:0060602	branch elongation of an epithelium	2019-01-07	20/17913	0.00779072	0.0372185	0.0161319	ESR1	1
GO:0070734	histone H3-K27 methylation	2019-01-07	20/17913	0.00779072	0.0372185	0.0161319	GATA3	1
GO:0032674	regulation of interleukin-5 production	2019-01-07	21/17913	0.00817889	0.0372185	0.0161319	GATA3	1
GO:0035162	embryonic hemopoiesis	2019-01-07	21/17913	0.00817889	0.0372185	0.0161319	GATA3	1
GO:0035455	response to interferon-alpha	2019-01-07	21/17913	0.00817889	0.0372185	0.0161319	GATA3	1
GO:0035743	CD4-positive, alpha-beta T cell cytokine production	2019-01-07	21/17913	0.00817889	0.0372185	0.0161319	GATA3	1
GO:0048485	sympathetic nervous system development	2019-01-07	21/17913	0.00817889	0.0372185	0.0161319	GATA3	1
GO:0060260	regulation of transcription initiation from RNA polymerase II promoter	2019-01-07	21/17913	0.00817889	0.0372185	0.0161319	ESR1	1
GO:0070920	regulation of production of small RNA involved in gene silencing by RNA	2019-01-07	21/17913	0.00817889	0.0372185	0.0161319	ESR1	1
GO:0072111	cell proliferation involved in kidney development	2019-01-07	21/17913	0.00817889	0.0372185	0.0161319	GATA3	1
GO:2000114	regulation of establishment of cell polarity	2019-01-07	21/17913	0.00817889	0.0372185	0.0161319	GATA3	1
GO:2000144	positive regulation of DNA-templated transcription, initiation	2019-01-07	21/17913	0.00817889	0.0372185	0.0161319	ESR1	1
GO:0032634	interleukin-5 production	2019-01-07	22/17913	0.00856693	0.0372185	0.0161319	GATA3	1
GO:0032656	regulation of interleukin-13 production	2019-01-07	22/17913	0.00856693	0.0372185	0.0161319	GATA3	1
GO:0044321	response to leptin	2019-01-07	22/17913	0.00856693	0.0372185	0.0161319	UGCG	1
GO:0048799	animal organ maturation	2019-01-07	22/17913	0.00856693	0.0372185	0.0161319	GATA3	1
GO:0051195	negative regulation of cofactor metabolic process	2019-01-07	22/17913	0.00856693	0.0372185	0.0161319	FBP1	1
GO:0060444	branching involved in mammary gland duct morphogenesis	2019-01-07	22/17913	0.00856693	0.0372185	0.0161319	ESR1	1
GO:0061213	positive regulation of mesonephros development	2019-01-07	22/17913	0.00856693	0.0372185	0.0161319	GATA3	1
GO:0072643	interferon-gamma secretion	2019-01-07	22/17913	0.00856693	0.0372185	0.0161319	GATA3	1
GO:0080111	DNA demethylation	2019-01-07	22/17913	0.00856693	0.0372185	0.0161319	GATA3	1
GO:0032703	negative regulation of interleukin-2 production	2019-01-07	23/17913	0.00895483	0.038058	0.0164957	GATA3	1
GO:0032753	positive regulation of interleukin-4 production	2019-01-07	23/17913	0.00895483	0.038058	0.0164957	GATA3	1
GO:0032878	regulation of establishment or maintenance of cell polarity	2019-01-07	23/17913	0.00895483	0.038058	0.0164957	GATA3	1
GO:0061436	establishment of skin barrier	2019-01-07	23/17913	0.00895483	0.038058	0.0164957	UGCG	1
GO:0006688	glycosphingolipid biosynthetic process	2019-01-07	24/17913	0.00934261	0.0394915	0.017117	UGCG	1
GO:0032616	interleukin-13 production	2019-01-07	25/17913	0.00973026	0.0404737	0.0175428	GATA3	1
GO:0060740	prostate gland epithelium morphogenesis	2019-01-07	25/17913	0.00973026	0.0404737	0.0175428	ESR1	1
GO:0070897	DNA-templated transcriptional preinitiation complex assembly	2019-01-07	25/17913	0.00973026	0.0404737	0.0175428	ESR1	1
GO:0033561	regulation of water loss via skin	2019-01-07	26/17913	0.0101178	0.0405749	0.0175866	UGCG	1
GO:0045992	negative regulation of embryonic development	2019-01-07	26/17913	0.0101178	0.0405749	0.0175866	GATA3	1
GO:0060037	pharyngeal system development	2019-01-07	26/17913	0.0101178	0.0405749	0.0175866	GATA3	1
GO:0060969	negative regulation of gene silencing	2019-01-07	26/17913	0.0101178	0.0405749	0.0175866	ESR1	1
GO:0061217	regulation of mesonephros development	2019-01-07	26/17913	0.0101178	0.0405749	0.0175866	GATA3	1
GO:1903579	negative regulation of ATP metabolic process	2019-01-07	26/17913	0.0101178	0.0405749	0.0175866	FBP1	1
GO:2000679	positive regulation of transcription regulatory region DNA binding	2019-01-07	26/17913	0.0101178	0.0405749	0.0175866	GATA3	1
GO:0043588	skin development	2019-02-07	412/17913	0.0102655	0.0409573	0.0177524	UGCG/DSC2	2
GO:0032673	regulation of interleukin-4 production	2019-01-07	27/17913	0.0105052	0.04096	0.0177536	GATA3	1
GO:0051569	regulation of histone H3-K4 methylation	2019-01-07	27/17913	0.0105052	0.04096	0.0177536	GATA3	1
GO:0060512	prostate gland morphogenesis	2019-01-07	27/17913	0.0105052	0.04096	0.0177536	ESR1	1
GO:0048732	gland development	2019-02-07	422/17913	0.0107503	0.04096	0.0177536	GATA3/ESR1	2
GO:0003180	aortic valve morphogenesis	2019-01-07	28/17913	0.0108924	0.04096	0.0177536	GATA3	1
GO:0008209	androgen metabolic process	2019-01-07	28/17913	0.0108924	0.04096	0.0177536	ESR1	1
GO:0010165	response to X-ray	2019-01-07	28/17913	0.0108924	0.04096	0.0177536	GATA3	1
GO:0035066	positive regulation of histone acetylation	2019-01-07	28/17913	0.0108924	0.04096	0.0177536	GATA3	1
GO:0035510	DNA dealkylation	2019-01-07	28/17913	0.0108924	0.04096	0.0177536	GATA3	1
GO:0071168	protein localization to chromatin	2019-01-07	28/17913	0.0108924	0.04096	0.0177536	ESR1	1
GO:1900543	negative regulation of purine nucleotide metabolic process	2019-01-07	28/17913	0.0108924	0.04096	0.0177536	FBP1	1
GO:0050673	epithelial cell proliferation	2019-02-07	425/17913	0.0108978	0.04096	0.0177536	GATA3/ESR1	2
GO:0048608	reproductive structure development	2019-02-07	426/17913	0.0109471	0.04096	0.0177536	GATA3/ESR1	2
GO:0061458	reproductive system development	2019-02-07	429/17913	0.0110958	0.0413186	0.017909	GATA3/ESR1	2
GO:0003401	axis elongation	2019-01-07	29/17913	0.0112795	0.0416066	0.0180338	ESR1	1
GO:0045980	negative regulation of nucleotide metabolic process	2019-01-07	29/17913	0.0112795	0.0416066	0.0180338	FBP1	1
GO:0002828	regulation of type 2 immune response	2019-01-07	30/17913	0.0116665	0.0422372	0.0183071	GATA3	1
GO:0032689	negative regulation of interferon-gamma production	2019-01-07	30/17913	0.0116665	0.0422372	0.0183071	GATA3	1
GO:0060603	mammary gland duct morphogenesis	2019-01-07	30/17913	0.0116665	0.0422372	0.0183071	ESR1	1
GO:2000142	regulation of DNA-templated transcription, initiation	2019-01-07	30/17913	0.0116665	0.0422372	0.0183071	ESR1	1
GO:0002724	regulation of T cell cytokine production	2019-01-07	31/17913	0.0120534	0.0432374	0.0187407	GATA3	1
GO:2000758	positive regulation of peptidyl-lysine acetylation	2019-01-07	31/17913	0.0120534	0.0432374	0.0187407	GATA3	1
GO:0008544	epidermis development	2019-02-07	452/17913	0.0122659	0.0436242	0.0189083	UGCG/DSC2	2
GO:0003176	aortic valve development	2019-01-07	32/17913	0.0124401	0.0436242	0.0189083	GATA3	1
GO:0032633	interleukin-4 production	2019-01-07	32/17913	0.0124401	0.0436242	0.0189083	GATA3	1
GO:0040036	regulation of fibroblast growth factor receptor signaling pathway	2019-01-07	32/17913	0.0124401	0.0436242	0.0189083	GATA3	1
GO:0071709	membrane assembly	2019-01-07	32/17913	0.0124401	0.0436242	0.0189083	UGCG	1
GO:0071353	cellular response to interleukin-4	2019-01-07	33/17913	0.0128267	0.0445801	0.0193226	GATA3	1
GO:2000352	negative regulation of endothelial cell apoptotic process	2019-01-07	33/17913	0.0128267	0.0445801	0.0193226	GATA3	1
GO:0071392	cellular response to estradiol stimulus	2019-01-07	34/17913	0.0132132	0.0455187	0.0197295	ESR1	1
GO:0098901	regulation of cardiac muscle cell action potential	2019-01-07	34/17913	0.0132132	0.0455187	0.0197295	DSC2	1
GO:0042092	type 2 immune response	2019-01-07	35/17913	0.0135996	0.0464405	0.020129	GATA3	1
GO:0110111	NA	2019-01-07	35/17913	0.0135996	0.0464405	0.020129	GATA3	1
GO:0050727	regulation of inflammatory response	2019-02-07	479/17913	0.0137071	0.0466041	0.0201999	GATA3/ESR1	2
GO:0050892	intestinal absorption	2019-01-07	36/17913	0.0139858	0.0467388	0.0202583	UGCG	1
GO:0070670	response to interleukin-4	2019-01-07	36/17913	0.0139858	0.0467388	0.0202583	GATA3	1
GO:0086091	regulation of heart rate by cardiac conduction	2019-01-07	36/17913	0.0139858	0.0467388	0.0202583	DSC2	1
GO:1905332	positive regulation of morphogenesis of an epithelium	2019-01-07	36/17913	0.0139858	0.0467388	0.0202583	GATA3	1
GO:0044091	membrane biogenesis	2019-01-07	37/17913	0.0143719	0.0476221	0.0206411	UGCG	1
GO:1905314	semi-lunar valve development	2019-01-07	37/17913	0.0143719	0.0476221	0.0206411	GATA3	1
GO:0002711	positive regulation of T cell mediated immunity	2019-01-07	38/17913	0.0147578	0.0480763	0.020838	GATA3	1
GO:0032350	regulation of hormone metabolic process	2019-01-07	38/17913	0.0147578	0.0480763	0.020838	GATA3	1
GO:0086005	ventricular cardiac muscle cell action potential	2019-01-07	38/17913	0.0147578	0.0480763	0.020838	DSC2	1
GO:0016055	Wnt signaling pathway	2019-02-07	498/17913	0.0147645	0.0480763	0.020838	GATA3/ESR1	2
GO:0050878	regulation of body fluid levels	2019-02-07	499/17913	0.0148211	0.0480763	0.020838	GATA3/UGCG	2
GO:0198738	cell-cell signaling by wnt	2019-02-07	500/17913	0.0148778	0.0480763	0.020838	GATA3/ESR1	2
GO:0002369	T cell cytokine production	2019-01-07	40/17913	0.0155294	0.0495672	0.0214842	GATA3	1
GO:0033146	regulation of intracellular estrogen receptor signaling pathway	2019-01-07	40/17913	0.0155294	0.0495672	0.0214842	ESR1	1
GO:0040019	positive regulation of embryonic development	2019-01-07	40/17913	0.0155294	0.0495672	0.0214842	GATA3	1
GO:0001709	cell fate determination	2019-01-07	41/17913	0.0159149	0.0499818	0.021664	GATA3	1
GO:0010677	negative regulation of cellular carbohydrate metabolic process	2019-01-07	41/17913	0.0159149	0.0499818	0.021664	FBP1	1
GO:0090184	positive regulation of kidney development	2019-01-07	41/17913	0.0159149	0.0499818	0.021664	GATA3	1
GO:1901985	positive regulation of protein acetylation	2019-01-07	41/17913	0.0159149	0.0499818	0.021664	GATA3	1
GO:0010863	positive regulation of phospholipase C activity	2019-01-07	42/17913	0.0163004	0.0505829	0.0219245	ESR1	1
GO:0046189	phenol-containing compound biosynthetic process	2019-01-07	42/17913	0.0163004	0.0505829	0.0219245	GATA3	1
GO:0086004	regulation of cardiac muscle cell contraction	2019-01-07	42/17913	0.0163004	0.0505829	0.0219245	DSC2	1
GO:0060443	mammary gland morphogenesis	2019-01-07	43/17913	0.0166857	0.0515422	0.0223403	ESR1	1
GO:0002437	inflammatory response to antigenic stimulus	2019-01-07	44/17913	0.0170709	0.0515422	0.0223403	GATA3	1
GO:0030850	prostate gland development	2019-01-07	44/17913	0.0170709	0.0515422	0.0223403	ESR1	1
GO:0035196	production of miRNAs involved in gene silencing by miRNA	2019-01-07	44/17913	0.0170709	0.0515422	0.0223403	ESR1	1
GO:0035850	epithelial cell differentiation involved in kidney development	2019-01-07	44/17913	0.0170709	0.0515422	0.0223403	GATA3	1
GO:0048483	autonomic nervous system development	2019-01-07	44/17913	0.0170709	0.0515422	0.0223403	GATA3	1
GO:1900274	regulation of phospholipase C activity	2019-01-07	44/17913	0.0170709	0.0515422	0.0223403	ESR1	1
GO:0022602	ovulation cycle process	2019-01-07	45/17913	0.0174559	0.0521013	0.0225826	ESR1	1
GO:0045058	T cell selection	2019-01-07	45/17913	0.0174559	0.0521013	0.0225826	GATA3	1
GO:0046580	negative regulation of Ras protein signal transduction	2019-01-07	45/17913	0.0174559	0.0521013	0.0225826	FBP1	1
GO:0006111	regulation of gluconeogenesis	2019-01-07	46/17913	0.0178408	0.052253	0.0226483	FBP1	1
GO:0048538	thymus development	2019-01-07	46/17913	0.0178408	0.052253	0.0226483	GATA3	1
GO:0048806	genitalia development	2019-01-07	46/17913	0.0178408	0.052253	0.0226483	ESR1	1
GO:0060986	endocrine hormone secretion	2019-01-07	46/17913	0.0178408	0.052253	0.0226483	GATA3	1
GO:1904036	negative regulation of epithelial cell apoptotic process	2019-01-07	46/17913	0.0178408	0.052253	0.0226483	GATA3	1
GO:0043124	negative regulation of I-kappaB kinase/NF-kappaB signaling	2019-01-07	47/17913	0.0182256	0.0525921	0.0227953	ESR1	1
GO:0043370	regulation of CD4-positive, alpha-beta T cell differentiation	2019-01-07	47/17913	0.0182256	0.0525921	0.0227953	GATA3	1
GO:0045912	negative regulation of carbohydrate metabolic process	2019-01-07	47/17913	0.0182256	0.0525921	0.0227953	FBP1	1
GO:1903115	regulation of actin filament-based movement	2019-01-07	47/17913	0.0182256	0.0525921	0.0227953	DSC2	1
GO:0031050	dsRNA fragmentation	2019-01-07	48/17913	0.0186103	0.0531141	0.0230216	ESR1	1
GO:0061647	histone H3-K9 modification	2019-01-07	48/17913	0.0186103	0.0531141	0.0230216	GATA3	1
GO:0070918	production of small RNA involved in gene silencing by RNA	2019-01-07	48/17913	0.0186103	0.0531141	0.0230216	ESR1	1
GO:0090102	cochlea development	2019-01-07	49/17913	0.0189948	0.0540144	0.0234118	GATA3	1
GO:0006584	catecholamine metabolic process	2019-01-07	51/17913	0.0197635	0.0548052	0.0237546	GATA3	1
GO:0009712	catechol-containing compound metabolic process	2019-01-07	51/17913	0.0197635	0.0548052	0.0237546	GATA3	1
GO:0035065	regulation of histone acetylation	2019-01-07	51/17913	0.0197635	0.0548052	0.0237546	GATA3	1
GO:0045599	negative regulation of fat cell differentiation	2019-01-07	51/17913	0.0197635	0.0548052	0.0237546	GATA3	1
GO:0048146	positive regulation of fibroblast proliferation	2019-01-07	51/17913	0.0197635	0.0548052	0.0237546	ESR1	1
GO:0051058	negative regulation of small GTPase mediated signal transduction	2019-01-07	51/17913	0.0197635	0.0548052	0.0237546	FBP1	1
GO:2000677	regulation of transcription regulatory region DNA binding	2019-01-07	51/17913	0.0197635	0.0548052	0.0237546	GATA3	1
GO:0002720	positive regulation of cytokine production involved in immune response	2019-01-07	52/17913	0.0201477	0.0552824	0.0239614	GATA3	1
GO:0003179	heart valve morphogenesis	2019-01-07	52/17913	0.0201477	0.0552824	0.0239614	GATA3	1
GO:0051568	histone H3-K4 methylation	2019-01-07	52/17913	0.0201477	0.0552824	0.0239614	GATA3	1
GO:0001541	ovarian follicle development	2019-01-07	54/17913	0.0209156	0.0565951	0.0245304	ESR1	1
GO:0032663	regulation of interleukin-2 production	2019-01-07	54/17913	0.0209156	0.0565951	0.0245304	GATA3	1
GO:0046513	ceramide biosynthetic process	2019-01-07	54/17913	0.0209156	0.0565951	0.0245304	UGCG	1
GO:0061005	cell differentiation involved in kidney development	2019-01-07	54/17913	0.0209156	0.0565951	0.0245304	GATA3	1
GO:0010332	response to gamma radiation	2019-01-07	55/17913	0.0212993	0.0572374	0.0248088	GATA3	1
GO:0098900	regulation of action potential	2019-01-07	55/17913	0.0212993	0.0572374	0.0248088	DSC2	1
GO:0086002	cardiac muscle cell action potential involved in contraction	2019-01-07	56/17913	0.021683	0.0578706	0.0250832	DSC2	1
GO:0086065	cell communication involved in cardiac conduction	2019-01-07	56/17913	0.021683	0.0578706	0.0250832	DSC2	1
GO:0010518	positive regulation of phospholipase activity	2019-01-07	57/17913	0.0220665	0.058101	0.0251831	ESR1	1
GO:0060688	regulation of morphogenesis of a branching structure	2019-01-07	57/17913	0.0220665	0.058101	0.0251831	ESR1	1
GO:0090183	regulation of kidney development	2019-01-07	57/17913	0.0220665	0.058101	0.0251831	GATA3	1
GO:2000756	regulation of peptidyl-lysine acetylation	2019-01-07	57/17913	0.0220665	0.058101	0.0251831	GATA3	1
GO:0030520	intracellular estrogen receptor signaling pathway	2019-01-07	58/17913	0.0224499	0.0585193	0.0253644	ESR1	1
GO:0042093	T-helper cell differentiation	2019-01-07	58/17913	0.0224499	0.0585193	0.0253644	GATA3	1
GO:0043966	histone H3 acetylation	2019-01-07	58/17913	0.0224499	0.0585193	0.0253644	GATA3	1
GO:2000351	regulation of endothelial cell apoptotic process	2019-01-07	59/17913	0.0228331	0.0591241	0.0256266	GATA3	1
GO:2000514	regulation of CD4-positive, alpha-beta T cell activation	2019-01-07	59/17913	0.0228331	0.0591241	0.0256266	GATA3	1
GO:0002294	CD4-positive, alpha-beta T cell differentiation involved in immune response	2019-01-07	60/17913	0.0232162	0.0593395	0.0257199	GATA3	1
GO:0009247	glycolipid biosynthetic process	2019-01-07	60/17913	0.0232162	0.0593395	0.0257199	UGCG	1
GO:0002287	alpha-beta T cell activation involved in immune response	2019-01-07	61/17913	0.0235992	0.0593395	0.0257199	GATA3	1
GO:0002293	alpha-beta T cell differentiation involved in immune response	2019-01-07	61/17913	0.0235992	0.0593395	0.0257199	GATA3	1
GO:0002709	regulation of T cell mediated immunity	2019-01-07	61/17913	0.0235992	0.0593395	0.0257199	GATA3	1
GO:0003170	heart valve development	2019-01-07	61/17913	0.0235992	0.0593395	0.0257199	GATA3	1
GO:0034113	heterotypic cell-cell adhesion	2019-01-07	61/17913	0.0235992	0.0593395	0.0257199	DSC2	1
GO:0043388	positive regulation of DNA binding	2019-01-07	61/17913	0.0235992	0.0593395	0.0257199	GATA3	1
GO:0070988	demethylation	2019-01-07	61/17913	0.0235992	0.0593395	0.0257199	GATA3	1
GO:0032623	interleukin-2 production	2019-01-07	62/17913	0.0239821	0.0601089	0.0260534	GATA3	1
GO:0046637	regulation of alpha-beta T cell differentiation	2019-01-07	63/17913	0.0243648	0.0608731	0.0263846	GATA3	1
GO:0031060	regulation of histone methylation	2019-01-07	64/17913	0.0247474	0.0614364	0.0266288	GATA3	1
GO:0060135	maternal process involved in female pregnancy	2019-01-07	64/17913	0.0247474	0.0614364	0.0266288	ESR1	1
GO:0006687	glycosphingolipid metabolic process	2019-01-07	65/17913	0.0251299	0.0619923	0.0268697	UGCG	1
GO:0072577	endothelial cell apoptotic process	2019-01-07	65/17913	0.0251299	0.0619923	0.0268697	GATA3	1
GO:0002292	T cell differentiation involved in immune response	2019-01-07	66/17913	0.0255122	0.0623455	0.0270228	GATA3	1
GO:0010517	regulation of phospholipase activity	2019-01-07	66/17913	0.0255122	0.0623455	0.0270228	ESR1	1
GO:0060675	ureteric bud morphogenesis	2019-01-07	66/17913	0.0255122	0.0623455	0.0270228	GATA3	1
GO:0072171	mesonephric tubule morphogenesis	2019-01-07	67/17913	0.0258944	0.0630824	0.0273422	GATA3	1
GO:0002088	lens development in camera-type eye	2019-01-07	68/17913	0.0262765	0.0632253	0.0274042	GATA3	1
GO:0042698	ovulation cycle	2019-01-07	68/17913	0.0262765	0.0632253	0.0274042	ESR1	1
GO:0050891	multicellular organismal water homeostasis	2019-01-07	68/17913	0.0262765	0.0632253	0.0274042	UGCG	1
GO:0086003	cardiac muscle cell contraction	2019-01-07	68/17913	0.0262765	0.0632253	0.0274042	DSC2	1
GO:0033077	T cell differentiation in thymus	2019-01-07	69/17913	0.0266585	0.0637521	0.0276325	GATA3	1
GO:0071479	cellular response to ionizing radiation	2019-01-07	69/17913	0.0266585	0.0637521	0.0276325	GATA3	1
GO:0007200	phospholipase C-activating G-protein coupled receptor signaling pathway	2019-01-07	70/17913	0.0270403	0.0642721	0.0278579	ESR1	1
GO:0060193	positive regulation of lipase activity	2019-01-07	70/17913	0.0270403	0.0642721	0.0278579	ESR1	1
GO:0034121	regulation of toll-like receptor signaling pathway	2019-01-07	71/17913	0.027422	0.0647855	0.0280804	ESR1	1
GO:1901983	regulation of protein acetylation	2019-01-07	71/17913	0.027422	0.0647855	0.0280804	GATA3	1
GO:1902036	regulation of hematopoietic stem cell differentiation	2019-01-07	72/17913	0.0278036	0.0654892	0.0283854	GATA3	1
GO:0003208	cardiac ventricle morphogenesis	2019-01-07	73/17913	0.028185	0.0661883	0.0286884	GATA3	1
GO:0030104	water homeostasis	2019-01-07	74/17913	0.0285663	0.0664848	0.0288169	UGCG	1
GO:0043367	CD4-positive, alpha-beta T cell differentiation	2019-01-07	74/17913	0.0285663	0.0664848	0.0288169	GATA3	1
GO:0086001	cardiac muscle cell action potential	2019-01-07	74/17913	0.0285663	0.0664848	0.0288169	DSC2	1
GO:0006110	regulation of glycolytic process	2019-01-07	75/17913	0.0289475	0.0667757	0.028943	FBP1	1
GO:0048024	regulation of mRNA splicing, via spliceosome	2019-01-07	75/17913	0.0289475	0.0667757	0.028943	KHDRBS3	1
GO:0072078	nephron tubule morphogenesis	2019-01-07	75/17913	0.0289475	0.0667757	0.028943	GATA3	1
GO:0003281	ventricular septum development	2019-01-07	76/17913	0.0293286	0.0674558	0.0292378	GATA3	1
GO:0006497	protein lipidation	2019-01-07	77/17913	0.0297095	0.0675374	0.0292732	UGCG	1
GO:0030811	regulation of nucleotide catabolic process	2019-01-07	77/17913	0.0297095	0.0675374	0.0292732	FBP1	1
GO:0034109	homotypic cell-cell adhesion	2019-01-07	77/17913	0.0297095	0.0675374	0.0292732	DSC2	1
GO:0072088	nephron epithelium morphogenesis	2019-01-07	77/17913	0.0297095	0.0675374	0.0292732	GATA3	1
GO:0033143	regulation of intracellular steroid hormone receptor signaling pathway	2019-01-07	78/17913	0.0300903	0.0682048	0.0295624	ESR1	1
GO:0061333	renal tubule morphogenesis	2019-01-07	79/17913	0.030471	0.0686695	0.0297639	GATA3	1
GO:0072028	nephron morphogenesis	2019-01-07	79/17913	0.030471	0.0686695	0.0297639	GATA3	1
GO:0050886	endocrine process	2019-01-07	80/17913	0.0308516	0.0691287	0.0299629	GATA3	1
GO:0110110	NA	2019-01-07	80/17913	0.0308516	0.0691287	0.0299629	GATA3	1
GO:0055117	regulation of cardiac muscle contraction	2019-01-07	81/17913	0.031232	0.0697812	0.0302457	DSC2	1
GO:0034502	protein localization to chromosome	2019-01-07	82/17913	0.0316123	0.0702295	0.03044	ESR1	1
GO:0042158	lipoprotein biosynthetic process	2019-01-07	82/17913	0.0316123	0.0702295	0.03044	UGCG	1
GO:0002718	regulation of cytokine production involved in immune response	2019-01-07	83/17913	0.0319924	0.0702755	0.03046	GATA3	1
GO:0006672	ceramide metabolic process	2019-01-07	83/17913	0.0319924	0.0702755	0.03046	UGCG	1
GO:0045582	positive regulation of T cell differentiation	2019-01-07	83/17913	0.0319924	0.0702755	0.03046	GATA3	1
GO:0060218	hematopoietic stem cell differentiation	2019-01-07	83/17913	0.0319924	0.0702755	0.03046	GATA3	1
GO:0043470	regulation of carbohydrate catabolic process	2019-01-07	84/17913	0.0323725	0.0709111	0.0307355	FBP1	1
GO:1901532	regulation of hematopoietic progenitor cell differentiation	2019-01-07	85/17913	0.0327524	0.0715429	0.0310093	GATA3	1
GO:0006094	gluconeogenesis	2019-01-07	86/17913	0.0331322	0.0719704	0.0311946	FBP1	1
GO:0048145	regulation of fibroblast proliferation	2019-01-07	86/17913	0.0331322	0.0719704	0.0311946	ESR1	1
GO:0048144	fibroblast proliferation	2019-01-07	87/17913	0.0335118	0.0722153	0.0313008	ESR1	1
GO:0072676	lymphocyte migration	2019-01-07	87/17913	0.0335118	0.0722153	0.0313008	GATA3	1
GO:0002286	T cell activation involved in immune response	2019-01-07	88/17913	0.0338913	0.0722153	0.0313008	GATA3	1
GO:0002456	T cell mediated immunity	2019-01-07	88/17913	0.0338913	0.0722153	0.0313008	GATA3	1
GO:0009791	post-embryonic development	2019-01-07	88/17913	0.0338913	0.0722153	0.0313008	GATA3	1
GO:0031058	positive regulation of histone modification	2019-01-07	88/17913	0.0338913	0.0722153	0.0313008	GATA3	1
GO:1904035	regulation of epithelial cell apoptotic process	2019-01-07	88/17913	0.0338913	0.0722153	0.0313008	GATA3	1
GO:0002824	positive regulation of adaptive immune response based on somatic recombination of immune receptors built from immunoglobulin superfamily domains	2019-01-07	89/17913	0.0342707	0.0722364	0.0313099	GATA3	1
GO:0019319	hexose biosynthetic process	2019-01-07	89/17913	0.0342707	0.0722364	0.0313099	FBP1	1
GO:0044728	DNA methylation or demethylation	2019-01-07	89/17913	0.0342707	0.0722364	0.0313099	GATA3	1
GO:0051289	protein homotetramerization	2019-01-07	89/17913	0.0342707	0.0722364	0.0313099	FBP1	1
GO:0035710	CD4-positive, alpha-beta T cell activation	2019-01-07	90/17913	0.03465	0.0722568	0.0313187	GATA3	1
GO:0046634	regulation of alpha-beta T cell activation	2019-01-07	90/17913	0.03465	0.0722568	0.0313187	GATA3	1
GO:0051196	regulation of coenzyme metabolic process	2019-01-07	90/17913	0.03465	0.0722568	0.0313187	FBP1	1
GO:2001169	regulation of ATP biosynthetic process	2019-01-07	90/17913	0.03465	0.0722568	0.0313187	FBP1	1
GO:0001656	metanephros development	2019-01-07	91/17913	0.0350292	0.0722765	0.0313273	GATA3	1
GO:0002708	positive regulation of lymphocyte mediated immunity	2019-01-07	91/17913	0.0350292	0.0722765	0.0313273	GATA3	1
GO:0007009	plasma membrane organization	2019-01-07	91/17913	0.0350292	0.0722765	0.0313273	UGCG	1
GO:0030148	sphingolipid biosynthetic process	2019-01-07	91/17913	0.0350292	0.0722765	0.0313273	UGCG	1
GO:0002702	positive regulation of production of molecular mediator of immune response	2019-01-07	93/17913	0.0357871	0.0728788	0.0315884	GATA3	1
GO:0032649	regulation of interferon-gamma production	2019-01-07	93/17913	0.0357871	0.0728788	0.0315884	GATA3	1
GO:0045621	positive regulation of lymphocyte differentiation	2019-01-07	93/17913	0.0357871	0.0728788	0.0315884	GATA3	1
GO:0046364	monosaccharide biosynthetic process	2019-01-07	93/17913	0.0357871	0.0728788	0.0315884	FBP1	1
GO:0072080	nephron tubule development	2019-01-07	93/17913	0.0357871	0.0728788	0.0315884	GATA3	1
GO:0002821	positive regulation of adaptive immune response	2019-01-07	94/17913	0.0361658	0.0728909	0.0315936	GATA3	1
GO:0022600	digestive system process	2019-01-07	94/17913	0.0361658	0.0728909	0.0315936	UGCG	1
GO:0043255	regulation of carbohydrate biosynthetic process	2019-01-07	94/17913	0.0361658	0.0728909	0.0315936	FBP1	1
GO:0060191	regulation of lipase activity	2019-01-07	94/17913	0.0361658	0.0728909	0.0315936	ESR1	1
GO:0008585	female gonad development	2019-01-07	95/17913	0.0365444	0.0729024	0.0315986	ESR1	1
GO:0042472	inner ear morphogenesis	2019-01-07	95/17913	0.0365444	0.0729024	0.0315986	GATA3	1
GO:0060993	kidney morphogenesis	2019-01-07	95/17913	0.0365444	0.0729024	0.0315986	GATA3	1
GO:0061326	renal tubule development	2019-01-07	95/17913	0.0365444	0.0729024	0.0315986	GATA3	1
GO:0006942	regulation of striated muscle contraction	2019-01-07	96/17913	0.0369229	0.0732836	0.0317638	DSC2	1
GO:0018958	phenol-containing compound metabolic process	2019-01-07	96/17913	0.0369229	0.0732836	0.0317638	GATA3	1
GO:0001657	ureteric bud development	2019-01-07	98/17913	0.0376796	0.0744076	0.032251	GATA3	1
GO:0002027	regulation of heart rate	2019-01-07	98/17913	0.0376796	0.0744076	0.032251	DSC2	1
GO:0046632	alpha-beta T cell differentiation	2019-01-07	99/17913	0.0380577	0.0745893	0.0323297	GATA3	1
GO:0072163	mesonephric epithelium development	2019-01-07	99/17913	0.0380577	0.0745893	0.0323297	GATA3	1
GO:0072164	mesonephric tubule development	2019-01-07	99/17913	0.0380577	0.0745893	0.0323297	GATA3	1
GO:0046545	development of primary female sexual characteristics	2019-01-07	100/17913	0.0384357	0.0751418	0.0325692	ESR1	1
GO:0002367	cytokine production involved in immune response	2019-01-07	101/17913	0.0388136	0.075503	0.0327258	GATA3	1
GO:1905269	positive regulation of chromatin organization	2019-01-07	101/17913	0.0388136	0.075503	0.0327258	GATA3	1
GO:0001823	mesonephros development	2019-01-07	103/17913	0.0395689	0.0767814	0.0332798	GATA3	1
GO:0032609	interferon-gamma production	2019-01-07	105/17913	0.0403238	0.0780524	0.0338308	GATA3	1
GO:0062014	negative regulation of small molecule metabolic process	2019-01-07	107/17913	0.0410781	0.0793162	0.0343785	FBP1	1
GO:0006664	glycolipid metabolic process	2019-01-07	108/17913	0.0414551	0.0793441	0.0343906	UGCG	1
GO:0050684	regulation of mRNA processing	2019-01-07	108/17913	0.0414551	0.0793441	0.0343906	KHDRBS3	1
GO:0008543	fibroblast growth factor receptor signaling pathway	2019-01-07	109/17913	0.0418319	0.0793441	0.0343906	GATA3	1
GO:0034968	histone lysine methylation	2019-01-07	109/17913	0.0418319	0.0793441	0.0343906	GATA3	1
GO:0072009	nephron epithelium development	2019-01-07	109/17913	0.0418319	0.0793441	0.0343906	GATA3	1
GO:1900371	regulation of purine nucleotide biosynthetic process	2019-01-07	109/17913	0.0418319	0.0793441	0.0343906	FBP1	1
GO:1903509	liposaccharide metabolic process	2019-01-07	109/17913	0.0418319	0.0793441	0.0343906	UGCG	1
GO:0006096	glycolytic process	2019-01-07	110/17913	0.0422086	0.0793441	0.0343906	FBP1	1
GO:0030808	regulation of nucleotide biosynthetic process	2019-01-07	110/17913	0.0422086	0.0793441	0.0343906	FBP1	1
GO:0042035	regulation of cytokine biosynthetic process	2019-01-07	110/17913	0.0422086	0.0793441	0.0343906	GATA3	1
GO:1903578	regulation of ATP metabolic process	2019-01-07	110/17913	0.0422086	0.0793441	0.0343906	FBP1	1
GO:0006757	ATP generation from ADP	2019-01-07	111/17913	0.0425852	0.079669	0.0345315	FBP1	1
GO:1904019	epithelial cell apoptotic process	2019-01-07	111/17913	0.0425852	0.079669	0.0345315	GATA3	1
GO:0030218	erythrocyte differentiation	2019-01-07	112/17913	0.0429617	0.0798006	0.0345885	GATA3	1
GO:0042157	lipoprotein metabolic process	2019-01-07	112/17913	0.0429617	0.0798006	0.0345885	UGCG	1
GO:0070268	cornification	2019-01-07	112/17913	0.0429617	0.0798006	0.0345885	DSC2	1
GO:0003279	cardiac septum development	2019-01-07	113/17913	0.043338	0.0798705	0.0346188	GATA3	1
GO:0010906	regulation of glucose metabolic process	2019-01-07	113/17913	0.043338	0.0798705	0.0346188	FBP1	1
GO:0060964	regulation of gene silencing by miRNA	2019-01-07	113/17913	0.043338	0.0798705	0.0346188	ESR1	1
GO:0006304	DNA modification	2019-01-07	114/17913	0.0437143	0.0798705	0.0346188	GATA3	1
GO:0042866	pyruvate biosynthetic process	2019-01-07	114/17913	0.0437143	0.0798705	0.0346188	FBP1	1
GO:0046660	female sex differentiation	2019-01-07	114/17913	0.0437143	0.0798705	0.0346188	ESR1	1
GO:0051193	regulation of cofactor metabolic process	2019-01-07	114/17913	0.0437143	0.0798705	0.0346188	FBP1	1
GO:0042471	ear morphogenesis	2019-01-07	115/17913	0.0440904	0.0799969	0.0346736	GATA3	1
GO:0043484	regulation of RNA splicing	2019-01-07	115/17913	0.0440904	0.0799969	0.0346736	KHDRBS3	1
GO:0070252	actin-mediated cell contraction	2019-01-07	115/17913	0.0440904	0.0799969	0.0346736	DSC2	1
GO:0022612	gland morphogenesis	2019-01-07	116/17913	0.0444663	0.0800606	0.0347012	ESR1	1
GO:0031929	TOR signaling	2019-01-07	116/17913	0.0444663	0.0800606	0.0347012	GATA3	1
GO:2000736	regulation of stem cell differentiation	2019-01-07	116/17913	0.0444663	0.0800606	0.0347012	GATA3	1
GO:0002705	positive regulation of leukocyte mediated immunity	2019-01-07	117/17913	0.0448421	0.0800606	0.0347012	GATA3	1
GO:0034754	cellular hormone metabolic process	2019-01-07	117/17913	0.0448421	0.0800606	0.0347012	ESR1	1
GO:0060147	regulation of posttranscriptional gene silencing	2019-01-07	117/17913	0.0448421	0.0800606	0.0347012	ESR1	1
GO:0060966	regulation of gene silencing by RNA	2019-01-07	117/17913	0.0448421	0.0800606	0.0347012	ESR1	1
GO:0001838	embryonic epithelial tube formation	2019-01-07	120/17913	0.0459689	0.0813296	0.0352512	GATA3	1
GO:0034101	erythrocyte homeostasis	2019-01-07	120/17913	0.0459689	0.0813296	0.0352512	GATA3	1
GO:0042089	cytokine biosynthetic process	2019-01-07	120/17913	0.0459689	0.0813296	0.0352512	GATA3	1
GO:0051101	regulation of DNA binding	2019-01-07	120/17913	0.0459689	0.0813296	0.0352512	GATA3	1
GO:0042107	cytokine metabolic process	2019-01-07	121/17913	0.0463442	0.0816243	0.0353789	GATA3	1
GO:0046031	ADP metabolic process	2019-01-07	121/17913	0.0463442	0.0816243	0.0353789	FBP1	1
GO:0018022	peptidyl-lysine methylation	2019-01-07	122/17913	0.0467194	0.0819161	0.0355054	GATA3	1
GO:0035270	endocrine system development	2019-01-07	122/17913	0.0467194	0.0819161	0.0355054	GATA3	1
GO:0001508	action potential	2019-01-07	123/17913	0.0470945	0.082389	0.0357104	DSC2	1
GO:0030010	establishment of cell polarity	2019-01-07	126/17913	0.048219	0.0841679	0.0364815	GATA3	1
GO:0045471	response to ethanol	2019-01-07	127/17913	0.0485935	0.0842482	0.0365162	GATA3	1
GO:0046467	membrane lipid biosynthetic process	2019-01-07	127/17913	0.0485935	0.0842482	0.0365162	UGCG	1
GO:0032355	response to estradiol	2019-01-07	128/17913	0.048968	0.0842482	0.0365162	ESR1	1
GO:0045995	regulation of embryonic development	2019-01-07	128/17913	0.048968	0.0842482	0.0365162	GATA3	1
GO:0072175	epithelial tube formation	2019-01-07	128/17913	0.048968	0.0842482	0.0365162	GATA3	1
GO:1900542	regulation of purine nucleotide metabolic process	2019-01-07	128/17913	0.048968	0.0842482	0.0365162	FBP1	1
GO:0003206	cardiac chamber morphogenesis	2019-01-07	129/17913	0.0493423	0.0842482	0.0365162	GATA3	1
GO:0006165	nucleoside diphosphate phosphorylation	2019-01-07	129/17913	0.0493423	0.0842482	0.0365162	FBP1	1
GO:0010595	positive regulation of endothelial cell migration	2019-01-07	129/17913	0.0493423	0.0842482	0.0365162	GATA3	1
GO:0030518	intracellular steroid hormone receptor signaling pathway	2019-01-07	129/17913	0.0493423	0.0842482	0.0365162	ESR1	1
GO:0007156	homophilic cell adhesion via plasma membrane adhesion molecules	2019-01-07	130/17913	0.0497165	0.0843231	0.0365487	DSC2	1
GO:0016571	histone methylation	2019-01-07	130/17913	0.0497165	0.0843231	0.0365487	GATA3	1
GO:0003231	cardiac ventricle development	2019-01-07	131/17913	0.0500905	0.0843231	0.0365487	GATA3	1
GO:0045598	regulation of fat cell differentiation	2019-01-07	131/17913	0.0500905	0.0843231	0.0365487	GATA3	1
GO:0046939	nucleotide phosphorylation	2019-01-07	131/17913	0.0500905	0.0843231	0.0365487	FBP1	1
GO:0006140	regulation of nucleotide metabolic process	2019-01-07	132/17913	0.0504645	0.0843231	0.0365487	FBP1	1
GO:0007586	digestion	2019-01-07	132/17913	0.0504645	0.0843231	0.0365487	UGCG	1
GO:0030048	actin filament-based movement	2019-01-07	132/17913	0.0504645	0.0843231	0.0365487	DSC2	1
GO:0050715	positive regulation of cytokine secretion	2019-01-07	132/17913	0.0504645	0.0843231	0.0365487	GATA3	1
GO:0060048	cardiac muscle contraction	2019-01-07	132/17913	0.0504645	0.0843231	0.0365487	DSC2	1
GO:0009135	purine nucleoside diphosphate metabolic process	2019-01-07	133/17913	0.0508383	0.0844067	0.0365849	FBP1	1
GO:0009179	purine ribonucleoside diphosphate metabolic process	2019-01-07	133/17913	0.0508383	0.0844067	0.0365849	FBP1	1
GO:0046631	alpha-beta T cell activation	2019-01-07	133/17913	0.0508383	0.0844067	0.0365849	GATA3	1
GO:0002822	regulation of adaptive immune response based on somatic recombination of immune receptors built from immunoglobulin superfamily domains	2019-01-07	135/17913	0.0515855	0.0851053	0.0368877	GATA3	1
GO:0009185	ribonucleoside diphosphate metabolic process	2019-01-07	135/17913	0.0515855	0.0851053	0.0368877	FBP1	1
GO:2000241	regulation of reproductive process	2019-01-07	135/17913	0.0515855	0.0851053	0.0368877	ESR1	1
GO:0002706	regulation of lymphocyte mediated immunity	2019-01-07	136/17913	0.051959	0.0853612	0.0369987	GATA3	1
GO:0009267	cellular response to starvation	2019-01-07	136/17913	0.051959	0.0853612	0.0369987	DSC2	1
GO:0002700	regulation of production of molecular mediator of immune response	2019-01-07	138/17913	0.0527055	0.0856875	0.0371401	GATA3	1
GO:0010675	regulation of cellular carbohydrate metabolic process	2019-01-07	138/17913	0.0527055	0.0856875	0.0371401	FBP1	1
GO:0014065	phosphatidylinositol 3-kinase signaling	2019-01-07	138/17913	0.0527055	0.0856875	0.0371401	GATA3	1
GO:0031056	regulation of histone modification	2019-01-07	138/17913	0.0527055	0.0856875	0.0371401	GATA3	1
GO:0044344	cellular response to fibroblast growth factor stimulus	2019-01-07	138/17913	0.0527055	0.0856875	0.0371401	GATA3	1
GO:0045580	regulation of T cell differentiation	2019-01-07	139/17913	0.0530785	0.0859367	0.0372481	GATA3	1
GO:0060968	regulation of gene silencing	2019-01-07	139/17913	0.0530785	0.0859367	0.0372481	ESR1	1
GO:0072073	kidney epithelium development	2019-01-07	140/17913	0.0534515	0.0863616	0.0374323	GATA3	1
GO:0051053	negative regulation of DNA metabolic process	2019-01-07	141/17913	0.0538243	0.0867847	0.0376156	GATA3	1
GO:0019359	nicotinamide nucleotide biosynthetic process	2019-01-07	142/17913	0.0541969	0.0868484	0.0376433	FBP1	1
GO:0019363	pyridine nucleotide biosynthetic process	2019-01-07	142/17913	0.0541969	0.0868484	0.0376433	FBP1	1
GO:0072006	nephron development	2019-01-07	142/17913	0.0541969	0.0868484	0.0376433	GATA3	1
GO:1902107	positive regulation of leukocyte differentiation	2019-01-07	143/17913	0.0545695	0.0869728	0.0376972	GATA3	1
GO:0006665	sphingolipid metabolic process	2019-01-07	144/17913	0.0549419	0.0869728	0.0376972	UGCG	1
GO:0010212	response to ionizing radiation	2019-01-07	144/17913	0.0549419	0.0869728	0.0376972	GATA3	1
GO:0035148	tube formation	2019-01-07	144/17913	0.0549419	0.0869728	0.0376972	GATA3	1
GO:0043467	regulation of generation of precursor metabolites and energy	2019-01-07	144/17913	0.0549419	0.0869728	0.0376972	FBP1	1
GO:0061337	cardiac conduction	2019-01-07	144/17913	0.0549419	0.0869728	0.0376972	DSC2	1
GO:0002262	myeloid cell homeostasis	2019-01-07	145/17913	0.0553142	0.0870336	0.0377236	GATA3	1
GO:0071774	response to fibroblast growth factor	2019-01-07	145/17913	0.0553142	0.0870336	0.0377236	GATA3	1
GO:0072525	pyridine-containing compound biosynthetic process	2019-01-07	145/17913	0.0553142	0.0870336	0.0377236	FBP1	1
GO:0016331	morphogenesis of embryonic epithelium	2019-01-07	146/17913	0.0556864	0.0871525	0.0377751	GATA3	1
GO:0048754	branching morphogenesis of an epithelial tube	2019-01-07	146/17913	0.0556864	0.0871525	0.0377751	ESR1	1
GO:0002224	toll-like receptor signaling pathway	2019-01-07	147/17913	0.0560584	0.0871525	0.0377751	ESR1	1
GO:0006090	pyruvate metabolic process	2019-01-07	147/17913	0.0560584	0.0871525	0.0377751	FBP1	1
GO:0071772	response to BMP	2019-01-07	147/17913	0.0560584	0.0871525	0.0377751	GATA3	1
GO:0071773	cellular response to BMP stimulus	2019-01-07	147/17913	0.0560584	0.0871525	0.0377751	GATA3	1
GO:0002819	regulation of adaptive immune response	2019-01-07	150/17913	0.0571738	0.0885345	0.0383741	GATA3	1
GO:0006754	ATP biosynthetic process	2019-01-07	150/17913	0.0571738	0.0885345	0.0383741	FBP1	1
GO:0016573	histone acetylation	2019-01-07	151/17913	0.0575454	0.0887584	0.0384711	GATA3	1
GO:0030856	regulation of epithelial cell differentiation	2019-01-07	151/17913	0.0575454	0.0887584	0.0384711	GATA3	1
GO:0001764	neuron migration	2019-01-07	152/17913	0.0579168	0.0891554	0.0386432	GATA3	1
GO:0009132	nucleoside diphosphate metabolic process	2019-01-07	153/17913	0.0582881	0.0895507	0.0388145	FBP1	1
GO:0071695	anatomical structure maturation	2019-01-07	155/17913	0.0590303	0.0905131	0.0392317	GATA3	1
GO:0018393	internal peptidyl-lysine acetylation	2019-01-07	156/17913	0.0594012	0.0907261	0.039324	GATA3	1
GO:0090288	negative regulation of cellular response to growth factor stimulus	2019-01-07	156/17913	0.0594012	0.0907261	0.039324	GATA3	1
GO:0002244	hematopoietic progenitor cell differentiation	2019-01-07	158/17913	0.0601427	0.0915011	0.0396599	GATA3	1
GO:0002285	lymphocyte activation involved in immune response	2019-01-07	158/17913	0.0601427	0.0915011	0.0396599	GATA3	1
GO:0009206	purine ribonucleoside triphosphate biosynthetic process	2019-01-07	159/17913	0.0605132	0.0918861	0.0398268	FBP1	1
GO:0009145	purine nucleoside triphosphate biosynthetic process	2019-01-07	160/17913	0.0608837	0.0920909	0.0399156	FBP1	1
GO:0048015	phosphatidylinositol-mediated signaling	2019-01-07	160/17913	0.0608837	0.0920909	0.0399156	GATA3	1
GO:0006475	internal protein amino acid acetylation	2019-01-07	161/17913	0.0612539	0.0924722	0.0400808	GATA3	1
GO:0048017	inositol lipid-mediated signaling	2019-01-07	163/17913	0.0619942	0.0930701	0.04034	GATA3	1
GO:0050680	negative regulation of epithelial cell proliferation	2019-01-07	163/17913	0.0619942	0.0930701	0.04034	GATA3	1
GO:0006937	regulation of muscle contraction	2019-01-07	164/17913	0.0623641	0.0930701	0.04034	DSC2	1
GO:0009201	ribonucleoside triphosphate biosynthetic process	2019-01-07	164/17913	0.0623641	0.0930701	0.04034	FBP1	1
GO:0018394	peptidyl-lysine acetylation	2019-01-07	164/17913	0.0623641	0.0930701	0.04034	GATA3	1
GO:0045619	regulation of lymphocyte differentiation	2019-01-07	164/17913	0.0623641	0.0930701	0.04034	GATA3	1
GO:1902275	regulation of chromatin organization	2019-01-07	165/17913	0.0627339	0.0934436	0.0405019	GATA3	1
GO:0051262	protein tetramerization	2019-01-07	166/17913	0.0631035	0.0938155	0.0406631	FBP1	1
GO:0030308	negative regulation of cell growth	2019-01-07	167/17913	0.0634731	0.0938298	0.0406692	FBP1	1
GO:0048469	cell maturation	2019-01-07	167/17913	0.0634731	0.0938298	0.0406692	GATA3	1
GO:0071248	cellular response to metal ion	2019-01-07	167/17913	0.0634731	0.0938298	0.0406692	FBP1	1
GO:0006479	protein methylation	2019-01-07	169/17913	0.0642118	0.0942094	0.0408338	GATA3	1
GO:0008213	protein alkylation	2019-01-07	169/17913	0.0642118	0.0942094	0.0408338	GATA3	1
GO:0009166	nucleotide catabolic process	2019-01-07	169/17913	0.0642118	0.0942094	0.0408338	FBP1	1
GO:2001252	positive regulation of chromosome organization	2019-01-07	169/17913	0.0642118	0.0942094	0.0408338	GATA3	1
GO:0003205	cardiac chamber development	2019-01-07	170/17913	0.064581	0.0942207	0.0408387	GATA3	1
GO:0006941	striated muscle contraction	2019-01-07	170/17913	0.064581	0.0942207	0.0408387	DSC2	1
GO:0050728	negative regulation of inflammatory response	2019-01-07	170/17913	0.064581	0.0942207	0.0408387	GATA3	1
GO:0043433	negative regulation of DNA binding transcription factor activity	2019-01-07	171/17913	0.06495	0.0945827	0.0409956	ESR1	1
GO:0007163	establishment or maintenance of cell polarity	2019-01-07	172/17913	0.0653189	0.0949431	0.0411518	GATA3	1
GO:0010634	positive regulation of epithelial cell migration	2019-01-07	173/17913	0.0656877	0.0951255	0.0412309	GATA3	1
GO:0071478	cellular response to radiation	2019-01-07	173/17913	0.0656877	0.0951255	0.0412309	GATA3	1
GO:0009127	purine nucleoside monophosphate biosynthetic process	2019-01-07	174/17913	0.0660564	0.0951309	0.0412332	FBP1	1
GO:0009168	purine ribonucleoside monophosphate biosynthetic process	2019-01-07	174/17913	0.0660564	0.0951309	0.0412332	FBP1	1
GO:0042594	response to starvation	2019-01-07	174/17913	0.0660564	0.0951309	0.0412332	DSC2	1
GO:0009142	nucleoside triphosphate biosynthetic process	2019-01-07	175/17913	0.0664249	0.0953106	0.0413111	FBP1	1
GO:1901292	nucleoside phosphate catabolic process	2019-01-07	175/17913	0.0664249	0.0953106	0.0413111	FBP1	1
GO:0006367	transcription initiation from RNA polymerase II promoter	2019-01-07	178/17913	0.0675298	0.0963632	0.0417673	ESR1	1
GO:0061138	morphogenesis of a branching epithelium	2019-01-07	178/17913	0.0675298	0.0963632	0.0417673	ESR1	1
GO:0006575	cellular modified amino acid metabolic process	2019-01-07	179/17913	0.0678979	0.0963632	0.0417673	GATA3	1
GO:0019362	pyridine nucleotide metabolic process	2019-01-07	179/17913	0.0678979	0.0963632	0.0417673	FBP1	1
GO:0035265	organ growth	2019-01-07	179/17913	0.0678979	0.0963632	0.0417673	ESR1	1
GO:0046496	nicotinamide nucleotide metabolic process	2019-01-07	179/17913	0.0678979	0.0963632	0.0417673	FBP1	1
GO:0050852	T cell receptor signaling pathway	2019-01-07	180/17913	0.0682658	0.0967098	0.0419176	GATA3	1
GO:0043401	steroid hormone mediated signaling pathway	2019-01-07	181/17913	0.0686336	0.0968799	0.0419913	ESR1	1
GO:0051099	positive regulation of binding	2019-01-07	181/17913	0.0686336	0.0968799	0.0419913	GATA3	1
GO:1903708	positive regulation of hemopoiesis	2019-01-07	182/17913	0.0690012	0.0972234	0.0421402	GATA3	1
GO:0072524	pyridine-containing compound metabolic process	2019-01-07	184/17913	0.0697362	0.0980697	0.042507	FBP1	1
GO:0002703	regulation of leukocyte mediated immunity	2019-01-07	185/17913	0.0701035	0.0980697	0.042507	GATA3	1
GO:0016052	carbohydrate catabolic process	2019-01-07	185/17913	0.0701035	0.0980697	0.042507	FBP1	1
GO:0048839	inner ear development	2019-01-07	185/17913	0.0701035	0.0980697	0.042507	GATA3	1
GO:0009156	ribonucleoside monophosphate biosynthetic process	2019-01-07	188/17913	0.0712047	0.0994322	0.0430976	FBP1	1
GO:0002440	production of molecular mediator of immune response	2019-01-07	191/17913	0.0723047	0.100609	0.0436076	GATA3	1
GO:0006643	membrane lipid metabolic process	2019-01-07	191/17913	0.0723047	0.100609	0.0436076	UGCG	1
GO:0001763	morphogenesis of a branching structure	2019-01-07	192/17913	0.0726711	0.10076	0.0436732	ESR1	1
GO:0006733	oxidoreduction coenzyme metabolic process	2019-01-07	192/17913	0.0726711	0.10076	0.0436732	FBP1	1
GO:0007565	female pregnancy	2019-01-07	193/17913	0.0730374	0.10091	0.0437382	ESR1	1
GO:0035637	multicellular organismal signaling	2019-01-07	193/17913	0.0730374	0.10091	0.0437382	DSC2	1
GO:0016051	carbohydrate biosynthetic process	2019-01-07	194/17913	0.0734036	0.101059	0.0438028	FBP1	1
GO:0071241	cellular response to inorganic substance	2019-01-07	194/17913	0.0734036	0.101059	0.0438028	FBP1	1
GO:0006473	protein acetylation	2019-01-07	195/17913	0.0737697	0.101385	0.0439438	GATA3	1
GO:0009124	nucleoside monophosphate biosynthetic process	2019-01-07	196/17913	0.0741356	0.101709	0.0440843	FBP1	1
GO:0002221	pattern recognition receptor signaling pathway	2019-01-07	197/17913	0.0745014	0.101997	0.0442091	ESR1	1
GO:0002699	positive regulation of immune effector process	2019-01-07	198/17913	0.0748671	0.101997	0.0442091	GATA3	1
GO:0006109	regulation of carbohydrate metabolic process	2019-01-07	198/17913	0.0748671	0.101997	0.0442091	FBP1	1
GO:0050870	positive regulation of T cell activation	2019-01-07	198/17913	0.0748671	0.101997	0.0442091	GATA3	1
GO:0002064	epithelial cell development	2019-01-07	199/17913	0.0752327	0.102316	0.0443477	ESR1	1
GO:0002573	myeloid leukocyte differentiation	2019-01-07	201/17913	0.0759634	0.102952	0.0446232	GATA3	1
GO:0050707	regulation of cytokine secretion	2019-01-07	201/17913	0.0759634	0.102952	0.0446232	GATA3	1
GO:0006006	glucose metabolic process	2019-01-07	204/17913	0.0770586	0.104256	0.0451883	FBP1	1
GO:0007411	axon guidance	2019-01-07	210/17913	0.0792457	0.106661	0.0462308	GATA3	1
GO:0043523	regulation of neuron apoptotic process	2019-01-07	210/17913	0.0792457	0.106661	0.0462308	GATA3	1
GO:0065004	protein-DNA complex assembly	2019-01-07	210/17913	0.0792457	0.106661	0.0462308	ESR1	1
GO:0034404	nucleobase-containing small molecule biosynthetic process	2019-01-07	211/17913	0.0796098	0.106967	0.0463634	FBP1	1
GO:0043583	ear development	2019-01-07	212/17913	0.0799737	0.107088	0.0464159	GATA3	1
GO:0097485	neuron projection guidance	2019-01-07	212/17913	0.0799737	0.107088	0.0464159	GATA3	1
GO:0060560	developmental growth involved in morphogenesis	2019-01-07	214/17913	0.0807013	0.107693	0.0466783	ESR1	1
GO:1903039	positive regulation of leukocyte cell-cell adhesion	2019-01-07	214/17913	0.0807013	0.107693	0.0466783	GATA3	1
GO:0046578	regulation of Ras protein signal transduction	2019-01-07	215/17913	0.0810648	0.107994	0.0468087	FBP1	1
GO:0009755	hormone-mediated signaling pathway	2019-01-07	216/17913	0.0814283	0.108294	0.0469386	ESR1	1
GO:0002526	acute inflammatory response	2019-01-07	220/17913	0.0828809	0.109852	0.047614	GATA3	1
GO:0031669	cellular response to nutrient levels	2019-01-07	220/17913	0.0828809	0.109852	0.047614	DSC2	1
GO:0045444	fat cell differentiation	2019-01-07	222/17913	0.0836065	0.110627	0.0479496	GATA3	1
GO:0031424	keratinization	2019-01-07	224/17913	0.0843316	0.110836	0.0480403	DSC2	1
GO:0043122	regulation of I-kappaB kinase/NF-kappaB signaling	2019-01-07	224/17913	0.0843316	0.110836	0.0480403	ESR1	1
GO:0046434	organophosphate catabolic process	2019-01-07	224/17913	0.0843316	0.110836	0.0480403	FBP1	1
GO:0050851	antigen receptor-mediated signaling pathway	2019-01-07	224/17913	0.0843316	0.110836	0.0480403	GATA3	1
GO:0044706	multi-multicellular organism process	2019-01-07	225/17913	0.0846939	0.111125	0.0481657	ESR1	1
GO:0050663	cytokine secretion	2019-01-07	230/17913	0.0865038	0.11331	0.0491126	GATA3	1
GO:0006352	DNA-templated transcription, initiation	2019-01-07	231/17913	0.0868655	0.113404	0.0491533	ESR1	1
GO:0010594	regulation of endothelial cell migration	2019-01-07	231/17913	0.0868655	0.113404	0.0491533	GATA3	1
GO:0097305	response to alcohol	2019-01-07	232/17913	0.087227	0.113686	0.0492756	GATA3	1
GO:0043543	protein acylation	2019-01-07	233/17913	0.0875883	0.113778	0.0493153	GATA3	1
GO:0098742	cell-cell adhesion via plasma-membrane adhesion molecules	2019-01-07	233/17913	0.0875883	0.113778	0.0493153	DSC2	1
GO:0030217	T cell differentiation	2019-01-07	234/17913	0.0879496	0.114057	0.0494366	GATA3	1
GO:0031348	negative regulation of defense response	2019-01-07	237/17913	0.0890326	0.115271	0.0499625	GATA3	1
GO:0045165	cell fate commitment	2019-01-07	238/17913	0.0893933	0.115356	0.0499994	GATA3	1
GO:0051402	neuron apoptotic process	2019-01-07	238/17913	0.0893933	0.115356	0.0499994	GATA3	1
GO:0019318	hexose metabolic process	2019-01-07	239/17913	0.089754	0.11544	0.050036	FBP1	1
GO:0031334	positive regulation of protein complex assembly	2019-01-07	239/17913	0.089754	0.11544	0.050036	ESR1	1
GO:0071824	protein-DNA complex subunit organization	2019-01-07	240/17913	0.0901145	0.115714	0.0501545	ESR1	1
GO:0048872	homeostasis of number of cells	2019-01-07	241/17913	0.0904749	0.115796	0.0501902	GATA3	1
GO:1901617	organic hydroxy compound biosynthetic process	2019-01-07	241/17913	0.0904749	0.115796	0.0501902	GATA3	1
GO:0071383	cellular response to steroid hormone stimulus	2019-01-07	243/17913	0.0911953	0.116527	0.0505072	ESR1	1
GO:0031330	negative regulation of cellular catabolic process	2019-01-07	244/17913	0.0915553	0.116606	0.0505414	FBP1	1
GO:0045926	negative regulation of growth	2019-01-07	244/17913	0.0915553	0.116606	0.0505414	FBP1	1
GO:0009108	coenzyme biosynthetic process	2019-01-07	245/17913	0.0919152	0.116874	0.0506576	FBP1	1
GO:0003007	heart morphogenesis	2019-01-07	249/17913	0.0933536	0.118319	0.0512836	GATA3	1
GO:0008016	regulation of heart contraction	2019-01-07	249/17913	0.0933536	0.118319	0.0512836	DSC2	1
GO:0090596	sensory organ morphogenesis	2019-01-07	250/17913	0.0937129	0.118461	0.0513454	GATA3	1
GO:0022409	positive regulation of cell-cell adhesion	2019-01-07	251/17913	0.0940721	0.118461	0.0513454	GATA3	1
GO:0031668	cellular response to extracellular stimulus	2019-01-07	251/17913	0.0940721	0.118461	0.0513454	DSC2	1
GO:0090257	regulation of muscle system process	2019-01-07	251/17913	0.0940721	0.118461	0.0513454	DSC2	1
GO:0007249	I-kappaB kinase/NF-kappaB signaling	2019-01-07	253/17913	0.0947901	0.119173	0.0516541	ESR1	1
GO:0007204	positive regulation of cytosolic calcium ion concentration	2019-01-07	255/17913	0.0955075	0.119883	0.0519615	ESR1	1
GO:0044262	cellular carbohydrate metabolic process	2019-01-07	256/17913	0.0958661	0.119948	0.0519897	FBP1	1
GO:0050714	positive regulation of protein secretion	2019-01-07	256/17913	0.0958661	0.119948	0.0519897	GATA3	1
GO:0051091	positive regulation of DNA binding transcription factor activity	2019-01-07	257/17913	0.0962245	0.120204	0.0521007	ESR1	1
GO:0051251	positive regulation of lymphocyte activation	2019-01-07	258/17913	0.0965829	0.120459	0.0522113	GATA3	1
GO:0021700	developmental maturation	2019-01-07	262/17913	0.0980149	0.12205	0.0529011	GATA3	1
GO:0009152	purine ribonucleotide biosynthetic process	2019-01-07	266/17913	0.099445	0.123438	0.0535026	FBP1	1
GO:0071356	cellular response to tumor necrosis factor	2019-01-07	266/17913	0.099445	0.123438	0.0535026	GATA3	1
GO:1902105	regulation of leukocyte differentiation	2019-01-07	267/17913	0.0998022	0.123685	0.0536097	GATA3	1
GO:0030522	intracellular receptor signaling pathway	2019-01-07	272/17913	0.101587	0.125671	0.0544705	ESR1	1
GO:0002793	positive regulation of peptide secretion	2019-01-07	275/17913	0.102656	0.125671	0.0544705	GATA3	1
GO:0043542	endothelial cell migration	2019-01-07	275/17913	0.102656	0.125671	0.0544705	GATA3	1
GO:0060047	heart contraction	2019-01-07	275/17913	0.102656	0.125671	0.0544705	DSC2	1
GO:1903311	regulation of mRNA metabolic process	2019-01-07	275/17913	0.102656	0.125671	0.0544705	KHDRBS3	1
GO:0001822	kidney development	2019-01-07	276/17913	0.103012	0.125671	0.0544705	GATA3	1
GO:0006959	humoral immune response	2019-01-07	276/17913	0.103012	0.125671	0.0544705	GATA3	1
GO:0043414	macromolecule methylation	2019-01-07	276/17913	0.103012	0.125671	0.0544705	GATA3	1
GO:0048562	embryonic organ morphogenesis	2019-01-07	276/17913	0.103012	0.125671	0.0544705	GATA3	1
GO:0090287	regulation of cellular response to growth factor stimulus	2019-01-07	276/17913	0.103012	0.125671	0.0544705	GATA3	1
GO:0005996	monosaccharide metabolic process	2019-01-07	277/17913	0.103368	0.125909	0.0545736	FBP1	1
GO:0009260	ribonucleotide biosynthetic process	2019-01-07	279/17913	0.104079	0.126579	0.0548638	FBP1	1
GO:0006164	purine nucleotide biosynthetic process	2019-01-07	280/17913	0.104435	0.126814	0.0549658	FBP1	1
GO:0003015	heart process	2019-01-07	284/17913	0.105856	0.127944	0.0554556	DSC2	1
GO:0034612	response to tumor necrosis factor	2019-01-07	284/17913	0.105856	0.127944	0.0554556	GATA3	1
GO:0046390	ribose phosphate biosynthetic process	2019-01-07	284/17913	0.105856	0.127944	0.0554556	FBP1	1
GO:0046034	ATP metabolic process	2019-01-07	287/17913	0.106921	0.128833	0.0558408	FBP1	1
GO:0048511	rhythmic process	2019-01-07	287/17913	0.106921	0.128833	0.0558408	ESR1	1
GO:0009895	negative regulation of catabolic process	2019-01-07	288/17913	0.107276	0.129061	0.0559398	FBP1	1
GO:0051480	regulation of cytosolic calcium ion concentration	2019-01-07	289/17913	0.10763	0.129289	0.0560385	ESR1	1
GO:0001818	negative regulation of cytokine production	2019-01-07	290/17913	0.107985	0.129516	0.0561368	GATA3	1
GO:0072001	renal system development	2019-01-07	291/17913	0.108339	0.129543	0.0561487	GATA3	1
GO:0072522	purine-containing compound biosynthetic process	2019-01-07	291/17913	0.108339	0.129543	0.0561487	FBP1	1
GO:1903522	regulation of blood circulation	2019-01-07	292/17913	0.108693	0.129768	0.0562463	DSC2	1
GO:0002449	lymphocyte mediated immunity	2019-01-07	293/17913	0.109047	0.129993	0.0563435	GATA3	1
GO:0010632	regulation of epithelial cell migration	2019-01-07	294/17913	0.109401	0.130043	0.0563655	GATA3	1
GO:0002460	adaptive immune response based on somatic recombination of immune receptors built from immunoglobulin superfamily domains	2019-01-07	295/17913	0.109755	0.130043	0.0563655	GATA3	1
GO:0043010	camera-type eye development	2019-01-07	295/17913	0.109755	0.130043	0.0563655	GATA3	1
GO:1903037	regulation of leukocyte cell-cell adhesion	2019-01-07	295/17913	0.109755	0.130043	0.0563655	GATA3	1
GO:0002758	innate immune response-activating signal transduction	2019-01-07	298/17913	0.110816	0.131102	0.0568242	ESR1	1
GO:0046879	hormone secretion	2019-01-07	301/17913	0.111876	0.132155	0.0572809	GATA3	1
GO:0002696	positive regulation of leukocyte activation	2019-01-07	305/17913	0.113287	0.13362	0.057916	GATA3	1
GO:0050863	regulation of T cell activation	2019-01-07	307/17913	0.113992	0.134249	0.0581886	GATA3	1
GO:0051188	cofactor biosynthetic process	2019-01-07	310/17913	0.115048	0.134691	0.05838	FBP1	1
GO:0071214	cellular response to abiotic stimulus	2019-01-07	310/17913	0.115048	0.134691	0.05838	GATA3	1
GO:0104004	cellular response to environmental stimulus	2019-01-07	310/17913	0.115048	0.134691	0.05838	GATA3	1
GO:0009914	hormone transport	2019-01-07	311/17913	0.1154	0.134691	0.05838	GATA3	1
GO:0033044	regulation of chromosome organization	2019-01-07	311/17913	0.1154	0.134691	0.05838	GATA3	1
GO:0060070	canonical Wnt signaling pathway	2019-01-07	311/17913	0.1154	0.134691	0.05838	GATA3	1
GO:1901214	regulation of neuron death	2019-01-07	313/17913	0.116104	0.13531	0.0586483	GATA3	1
GO:0009205	purine ribonucleoside triphosphate metabolic process	2019-01-07	314/17913	0.116455	0.135518	0.0587384	FBP1	1
GO:0051056	regulation of small GTPase mediated signal transduction	2019-01-07	316/17913	0.117158	0.136133	0.059005	FBP1	1
GO:0009167	purine ribonucleoside monophosphate metabolic process	2019-01-07	317/17913	0.117509	0.136143	0.0590094	FBP1	1
GO:0009126	purine nucleoside monophosphate metabolic process	2019-01-07	318/17913	0.11786	0.136143	0.0590094	FBP1	1
GO:0072330	monocarboxylic acid biosynthetic process	2019-01-07	318/17913	0.11786	0.136143	0.0590094	FBP1	1
GO:0002218	activation of innate immune response	2019-01-07	319/17913	0.118211	0.136143	0.0590094	ESR1	1
GO:0009199	ribonucleoside triphosphate metabolic process	2019-01-07	319/17913	0.118211	0.136143	0.0590094	FBP1	1
GO:0050867	positive regulation of cell activation	2019-01-07	319/17913	0.118211	0.136143	0.0590094	GATA3	1
GO:0071496	cellular response to external stimulus	2019-01-07	320/17913	0.118562	0.136346	0.0590975	DSC2	1
GO:0008202	steroid metabolic process	2019-01-07	321/17913	0.118913	0.136349	0.0590985	ESR1	1
GO:0009144	purine nucleoside triphosphate metabolic process	2019-01-07	321/17913	0.118913	0.136349	0.0590985	FBP1	1
GO:0009615	response to virus	2019-01-07	323/17913	0.119614	0.136952	0.0593598	GATA3	1
GO:0007265	Ras protein signal transduction	2019-01-07	324/17913	0.119964	0.137152	0.0594467	FBP1	1
GO:0030098	lymphocyte differentiation	2019-01-07	325/17913	0.120314	0.137352	0.0595332	GATA3	1
GO:0007159	leukocyte cell-cell adhesion	2019-01-07	328/17913	0.121364	0.138147	0.0598779	GATA3	1
GO:0046677	response to antibiotic	2019-01-07	328/17913	0.121364	0.138147	0.0598779	GATA3	1
GO:0007596	blood coagulation	2019-01-07	331/17913	0.122413	0.138936	0.0602201	GATA3	1
GO:0009161	ribonucleoside monophosphate metabolic process	2019-01-07	331/17913	0.122413	0.138936	0.0602201	FBP1	1
GO:0006869	lipid transport	2019-01-07	332/17913	0.122763	0.139131	0.0603045	UGCG	1
GO:0010038	response to metal ion	2019-01-07	335/17913	0.12381	0.140094	0.0607217	FBP1	1
GO:0007599	hemostasis	2019-01-07	336/17913	0.124159	0.140094	0.0607217	GATA3	1
GO:0032259	methylation	2019-01-07	336/17913	0.124159	0.140094	0.0607217	GATA3	1
GO:0009141	nucleoside triphosphate metabolic process	2019-01-07	337/17913	0.124508	0.140094	0.0607217	FBP1	1
GO:0050817	coagulation	2019-01-07	337/17913	0.124508	0.140094	0.0607217	GATA3	1
GO:0030111	regulation of Wnt signaling pathway	2019-01-07	341/17913	0.125902	0.141212	0.0612063	ESR1	1
GO:0032970	regulation of actin filament-based process	2019-01-07	341/17913	0.125902	0.141212	0.0612063	DSC2	1
GO:0001654	eye development	2019-01-07	342/17913	0.12625	0.141212	0.0612063	GATA3	1
GO:0001701	in utero embryonic development	2019-01-07	342/17913	0.12625	0.141212	0.0612063	GATA3	1
GO:0006936	muscle contraction	2019-01-07	343/17913	0.126598	0.141212	0.0612063	DSC2	1
GO:0032102	negative regulation of response to external stimulus	2019-01-07	343/17913	0.126598	0.141212	0.0612063	GATA3	1
GO:0000377	RNA splicing, via transesterification reactions with bulged adenosine as nucleophile	2019-01-07	344/17913	0.126946	0.141212	0.0612063	KHDRBS3	1
GO:0000398	mRNA splicing, via spliceosome	2019-01-07	344/17913	0.126946	0.141212	0.0612063	KHDRBS3	1
GO:0051260	protein homooligomerization	2019-01-07	345/17913	0.127294	0.141398	0.0612869	FBP1	1
GO:0150063	NA	2019-01-07	346/17913	0.127642	0.141567	0.0613602	GATA3	1
GO:0070997	neuron death	2019-01-07	347/17913	0.127989	0.141567	0.0613602	GATA3	1
GO:2000146	negative regulation of cell motility	2019-01-07	347/17913	0.127989	0.141567	0.0613602	GATA3	1
GO:0000375	RNA splicing, via transesterification reactions	2019-01-07	348/17913	0.128337	0.141751	0.0614399	KHDRBS3	1
GO:0009123	nucleoside monophosphate metabolic process	2019-01-07	349/17913	0.128684	0.141934	0.0615193	FBP1	1
GO:0048880	sensory system development	2019-01-07	351/17913	0.129379	0.142499	0.0617641	GATA3	1
GO:0010631	epithelial cell migration	2019-01-07	354/17913	0.130419	0.143443	0.0621734	GATA3	1
GO:0090132	epithelium migration	2019-01-07	357/17913	0.131459	0.144383	0.062581	GATA3	1
GO:0009165	nucleotide biosynthetic process	2019-01-07	360/17913	0.132497	0.14532	0.0629869	FBP1	1
GO:0035690	cellular response to drug	2019-01-07	362/17913	0.133189	0.145874	0.0632271	FBP1	1
GO:0090130	tissue migration	2019-01-07	363/17913	0.133535	0.146048	0.0633026	GATA3	1
GO:0010256	endomembrane system organization	2019-01-07	365/17913	0.134226	0.14616	0.0633509	UGCG	1
GO:0051271	negative regulation of cellular component movement	2019-01-07	365/17913	0.134226	0.14616	0.0633509	GATA3	1
GO:1901293	nucleoside phosphate biosynthetic process	2019-01-07	365/17913	0.134226	0.14616	0.0633509	FBP1	1
GO:0006732	coenzyme metabolic process	2019-01-07	366/17913	0.134571	0.14616	0.0633509	FBP1	1
GO:0010876	lipid localization	2019-01-07	366/17913	0.134571	0.14616	0.0633509	UGCG	1
GO:0051098	regulation of binding	2019-01-07	368/17913	0.135262	0.146706	0.0635876	GATA3	1
GO:0050678	regulation of epithelial cell proliferation	2019-01-07	369/17913	0.135607	0.146876	0.0636615	GATA3	1
GO:0045089	positive regulation of innate immune response	2019-01-07	373/17913	0.136986	0.148164	0.0642198	ESR1	1
GO:0042391	regulation of membrane potential	2019-01-07	374/17913	0.13733	0.148294	0.064276	DSC2	1
GO:0006874	cellular calcium ion homeostasis	2019-01-07	375/17913	0.137674	0.148294	0.064276	ESR1	1
GO:0048545	response to steroid hormone	2019-01-07	375/17913	0.137674	0.148294	0.064276	ESR1	1
GO:0018205	peptidyl-lysine modification	2019-01-07	376/17913	0.138019	0.14846	0.064348	GATA3	1
GO:0040013	negative regulation of locomotion	2019-01-07	377/17913	0.138363	0.148626	0.0644198	GATA3	1
GO:1903532	positive regulation of secretion by cell	2019-01-07	381/17913	0.139738	0.149897	0.0649708	GATA3	1
GO:0045785	positive regulation of cell adhesion	2019-01-07	388/17913	0.14214	0.152056	0.0659068	GATA3	1
GO:0055074	calcium ion homeostasis	2019-01-07	388/17913	0.14214	0.152056	0.0659068	ESR1	1
GO:0022407	regulation of cell-cell adhesion	2019-01-07	389/17913	0.142482	0.152215	0.0659754	GATA3	1
GO:0072503	cellular divalent inorganic cation homeostasis	2019-01-07	392/17913	0.143509	0.153103	0.0663604	ESR1	1
GO:0007409	axonogenesis	2019-01-07	393/17913	0.143852	0.153259	0.066428	GATA3	1
GO:0001558	regulation of cell growth	2019-01-07	396/17913	0.144878	0.154142	0.0668107	FBP1	1
GO:0002429	immune response-activating cell surface receptor signaling pathway	2019-01-07	399/17913	0.145902	0.155021	0.0671919	GATA3	1
GO:0051249	regulation of lymphocyte activation	2019-01-07	401/17913	0.146585	0.155535	0.0674146	GATA3	1
GO:0051052	regulation of DNA metabolic process	2019-01-07	403/17913	0.147267	0.155836	0.0675451	GATA3	1
GO:0051222	positive regulation of protein transport	2019-01-07	403/17913	0.147267	0.155836	0.0675451	GATA3	1
GO:0043254	regulation of protein complex assembly	2019-01-07	409/17913	0.149311	0.157572	0.0682975	ESR1	1
GO:0051047	positive regulation of secretion	2019-01-07	409/17913	0.149311	0.157572	0.0682975	GATA3	1
GO:0030099	myeloid cell differentiation	2019-01-07	411/17913	0.149991	0.158077	0.0685163	GATA3	1
GO:0072507	divalent inorganic cation homeostasis	2019-01-07	412/17913	0.150331	0.158222	0.0685791	ESR1	1
GO:0048568	embryonic organ development	2019-01-07	413/17913	0.150671	0.158366	0.0686418	GATA3	1
GO:0016570	histone modification	2019-01-07	420/17913	0.153047	0.160647	0.0696305	GATA3	1
GO:0046394	carboxylic acid biosynthetic process	2019-01-07	426/17913	0.155078	0.162562	0.0704603	FBP1	1
GO:0016053	organic acid biosynthetic process	2019-01-07	427/17913	0.155416	0.162698	0.0705194	FBP1	1
GO:0051090	regulation of DNA binding transcription factor activity	2019-01-07	429/17913	0.156093	0.163188	0.0707315	ESR1	1
GO:0016569	covalent chromatin modification	2019-01-07	433/17913	0.157443	0.164161	0.0711534	GATA3	1
GO:0023061	signal release	2019-01-07	433/17913	0.157443	0.164161	0.0711534	GATA3	1
GO:0002768	immune response-regulating cell surface receptor signaling pathway	2019-01-07	434/17913	0.157781	0.164294	0.0712109	GATA3	1
GO:0009314	response to radiation	2019-01-07	435/17913	0.158118	0.164426	0.0712682	GATA3	1
GO:0061564	axon development	2019-01-07	438/17913	0.159129	0.16508	0.0715518	GATA3	1
GO:0062012	regulation of small molecule metabolic process	2019-01-07	439/17913	0.159466	0.16508	0.0715518	FBP1	1
GO:0008380	RNA splicing	2019-01-07	440/17913	0.159803	0.16508	0.0715518	KHDRBS3	1
GO:0045088	regulation of innate immune response	2019-01-07	440/17913	0.159803	0.16508	0.0715518	ESR1	1
GO:1904951	positive regulation of establishment of protein localization	2019-01-07	440/17913	0.159803	0.16508	0.0715518	GATA3	1
GO:0002697	regulation of immune effector process	2019-01-07	441/17913	0.160139	0.16521	0.0716079	GATA3	1
GO:0042110	T cell activation	2019-01-07	443/17913	0.160812	0.165685	0.0718141	GATA3	1
GO:0001667	ameboidal-type cell migration	2019-01-07	446/17913	0.161821	0.166286	0.0720745	GATA3	1
GO:0001819	positive regulation of cytokine production	2019-01-07	446/17913	0.161821	0.166286	0.0720745	GATA3	1
GO:0003012	muscle system process	2019-01-07	448/17913	0.162492	0.166757	0.0722787	DSC2	1
GO:0042326	negative regulation of phosphorylation	2019-01-07	455/17913	0.16484	0.168944	0.0732267	FBP1	1
GO:0050708	regulation of protein secretion	2019-01-07	456/17913	0.165175	0.169066	0.0732794	GATA3	1
GO:0010975	regulation of neuron projection development	2019-01-07	458/17913	0.165844	0.169308	0.0733843	GATA3	1
GO:0016311	dephosphorylation	2019-01-07	458/17913	0.165844	0.169308	0.0733843	FBP1	1
GO:0007264	small GTPase mediated signal transduction	2019-01-07	465/17913	0.168183	0.171259	0.0742301	FBP1	1
GO:0016049	cell growth	2019-01-07	466/17913	0.168517	0.171259	0.0742301	FBP1	1
GO:0031667	response to nutrient levels	2019-01-07	466/17913	0.168517	0.171259	0.0742301	DSC2	1
GO:0006875	cellular metal ion homeostasis	2019-01-07	467/17913	0.16885	0.171259	0.0742301	ESR1	1
GO:0050900	leukocyte migration	2019-01-07	467/17913	0.16885	0.171259	0.0742301	GATA3	1
GO:1903706	regulation of hemopoiesis	2019-01-07	468/17913	0.169184	0.171375	0.0742804	GATA3	1
GO:0048871	multicellular organismal homeostasis	2019-01-07	472/17913	0.170517	0.172502	0.0747687	UGCG	1
GO:0002791	regulation of peptide secretion	2019-01-07	483/17913	0.174173	0.175973	0.076273	GATA3	1
GO:0002521	leukocyte differentiation	2019-01-07	485/17913	0.174836	0.176415	0.0764647	GATA3	1
GO:0002694	regulation of leukocyte activation	2019-01-07	492/17913	0.177153	0.178523	0.0773784	GATA3	1
GO:0009991	response to extracellular stimulus	2019-01-07	498/17913	0.179135	0.179795	0.0779298	DSC2	1
GO:0006397	mRNA processing	2019-01-07	499/17913	0.179465	0.179795	0.0779298	KHDRBS3	1
GO:0009636	response to toxic substance	2019-01-07	499/17913	0.179465	0.179795	0.0779298	GATA3	1
GO:0009150	purine ribonucleotide metabolic process	2019-01-07	500/17913	0.179795	0.179795	0.0779298	FBP1	1
GO:0048667	cell morphogenesis involved in neuron differentiation	2019-01-07	500/17913	0.179795	0.179795	0.0779298	GATA3	1
GO:1901615	organic hydroxy compound metabolic process	2019-01-07	500/17913	0.179795	0.179795	0.0779298	GATA3	1
GO:0008120	ceramide glucosyltransferase activity	2019-01-09	1/16969	0.000530379	0.010254	0.00334976	UGCG	1
GO:0042132	fructose 1,6-bisphosphate 1-phosphatase activity	2019-01-09	1/16969	0.000530379	0.010254	0.00334976	FBP1	1
GO:0102769	dihydroceramide glucosyltransferase activity	2019-01-09	1/16969	0.000530379	0.010254	0.00334976	UGCG	1
GO:0001085	RNA polymerase II transcription factor binding	2019-02-09	113/16969	0.00153477	0.0167595	0.00547497	ESR1/FBP1	2
GO:0001093	TFIIB-class transcription factor binding	2019-01-09	3/16969	0.00159039	0.0167595	0.00547497	ESR1	1
GO:0034056	estrogen response element binding	2019-01-09	4/16969	0.00212002	0.0167595	0.00547497	ESR1	1
GO:0005134	interleukin-2 receptor binding	2019-01-09	5/16969	0.0026494	0.0167595	0.00547497	GATA3	1
GO:0030284	estrogen receptor activity	2019-01-09	5/16969	0.0026494	0.0167595	0.00547497	ESR1	1
GO:0086083	cell adhesive protein binding involved in bundle of His cell-Purkinje myocyte communication	2019-01-09	5/16969	0.0026494	0.0167595	0.00547497	DSC2	1
GO:0019203	carbohydrate phosphatase activity	2019-01-09	6/16969	0.00317853	0.0167595	0.00547497	FBP1	1
GO:0050308	sugar-phosphatase activity	2019-01-09	6/16969	0.00317853	0.0167595	0.00547497	FBP1	1
GO:0030235	nitric-oxide synthase regulator activity	2019-01-09	7/16969	0.0037074	0.0179191	0.0058538	ESR1	1
GO:0016208	AMP binding	2019-01-09	10/16969	0.00529255	0.0236129	0.00771384	FBP1	1
GO:0035251	UDP-glucosyltransferase activity	2019-01-09	11/16969	0.00582043	0.0241132	0.00787728	UGCG	1
GO:0086080	protein binding involved in heterotypic cell-cell adhesion	2019-01-09	13/16969	0.00687545	0.0265851	0.00868478	DSC2	1
GO:0071837	HMG box domain binding	2019-01-09	16/16969	0.00845611	0.0290264	0.00948231	GATA3	1
GO:0001091	RNA polymerase II basal transcription factor binding	2019-01-09	18/16969	0.00950864	0.0290264	0.00948231	ESR1	1
GO:0017025	TBP-class protein binding	2019-01-09	18/16969	0.00950864	0.0290264	0.00948231	ESR1	1
GO:0046527	glucosyltransferase activity	2019-01-09	18/16969	0.00950864	0.0290264	0.00948231	UGCG	1
GO:0004190	aspartic-type endopeptidase activity	2019-01-09	20/16969	0.0105602	0.0306101	0.00999967	NRIP3	1
GO:0001223	transcription coactivator binding	2019-01-09	21/16969	0.0110856	0.0306101	0.00999967	ESR1	1
GO:0070001	aspartic-type peptidase activity	2019-01-09	22/16969	0.0116107	0.0306101	0.00999967	NRIP3	1
GO:0001228	transcriptional activator activity, RNA polymerase II transcription regulatory region sequence-specific DNA binding	2019-02-09	390/16969	0.0170449	0.04198	0.013714	GATA3/ESR1	2
GO:0098632	cell-cell adhesion mediator activity	2019-01-09	33/16969	0.017371	0.04198	0.013714	DSC2	1
GO:0001221	transcription cofactor binding	2019-01-09	38/16969	0.0199795	0.0450289	0.01471	ESR1	1
GO:0000978	RNA polymerase II proximal promoter sequence-specific DNA binding	2019-02-09	432/16969	0.0206779	0.0450289	0.01471	GATA3/ESR1	2
GO:0030331	estrogen receptor binding	2019-01-09	41/16969	0.0215416	0.0450289	0.01471	ESR1	1
GO:0098631	cell adhesion mediator activity	2019-01-09	42/16969	0.0220618	0.0450289	0.01471	DSC2	1
GO:0000987	proximal promoter sequence-specific DNA binding	2019-02-09	452/16969	0.0225145	0.0450289	0.01471	GATA3/ESR1	2
GO:0004879	nuclear receptor activity	2019-01-09	46/16969	0.0241402	0.0451655	0.0147546	ESR1	1
GO:0098531	transcription factor activity, direct ligand regulated sequence-specific DNA binding	2019-01-09	46/16969	0.0241402	0.0451655	0.0147546	ESR1	1
GO:0070888	E-box binding	2019-01-09	49/16969	0.0256964	0.0465747	0.015215	GATA3	1
GO:0003707	steroid hormone receptor activity	2019-01-09	54/16969	0.0282852	0.0497133	0.0162403	ESR1	1
GO:0001098	basal transcription machinery binding	2019-01-09	60/16969	0.0313836	0.0520072	0.0169896	ESR1	1
GO:0001099	basal RNA polymerase II transcription machinery binding	2019-01-09	60/16969	0.0313836	0.0520072	0.0169896	ESR1	1
GO:0048029	monosaccharide binding	2019-01-09	62/16969	0.0324145	0.0522234	0.0170603	FBP1	1
GO:0051117	ATPase binding	2019-01-09	77/16969	0.040115	0.0620087	0.0202569	ESR1	1
GO:0008013	beta-catenin binding	2019-01-09	78/16969	0.0406264	0.0620087	0.0202569	ESR1	1
GO:0005496	steroid binding	2019-01-09	83/16969	0.0431799	0.0642163	0.0209781	ESR1	1
GO:0035258	steroid hormone receptor binding	2019-01-09	88/16969	0.0457273	0.0663047	0.0216603	ESR1	1
GO:0001158	enhancer sequence-specific DNA binding	2019-01-09	107/16969	0.0553527	0.0783039	0.0255802	GATA3	1
GO:0035326	enhancer binding	2019-01-09	121/16969	0.0623898	0.0829013	0.0270821	GATA3	1
GO:0070851	growth factor receptor binding	2019-01-09	121/16969	0.0623898	0.0829013	0.0270821	GATA3	1
GO:0017124	SH3 domain binding	2019-01-09	122/16969	0.0628907	0.0829013	0.0270821	KHDRBS3	1
GO:0008194	UDP-glycosyltransferase activity	2019-01-09	138/16969	0.0708722	0.0913463	0.0298409	UGCG	1
GO:0035257	nuclear hormone receptor binding	2019-01-09	147/16969	0.0753351	0.0949878	0.0310305	ESR1	1
GO:0051427	hormone receptor binding	2019-01-09	170/16969	0.0866541	0.106935	0.0349333	ESR1	1
GO:0016758	transferase activity, transferring hexosyl groups	2019-01-09	194/16969	0.0983337	0.11882	0.0388159	UGCG	1
GO:0005126	cytokine receptor binding	2019-01-09	210/16969	0.106046	0.125524	0.041006	GATA3	1
GO:0001227	transcriptional repressor activity, RNA polymerase II transcription regulatory region sequence-specific DNA binding	2019-01-09	224/16969	0.112746	0.128221	0.0418872	GATA3	1
GO:0016791	phosphatase activity	2019-01-09	224/16969	0.112746	0.128221	0.0418872	FBP1	1
GO:0030246	carbohydrate binding	2019-01-09	252/16969	0.126013	0.140473	0.0458896	FBP1	1
GO:0016757	transferase activity, transferring glycosyl groups	2019-01-09	257/16969	0.128363	0.140473	0.0458896	UGCG	1
GO:0003713	transcription coactivator activity	2019-01-09	285/16969	0.141422	0.151898	0.0496218	GATA3	1
GO:0042578	phosphoric ester hydrolase activity	2019-01-09	305/16969	0.150643	0.15886	0.0518962	FBP1	1
GO:0004175	endopeptidase activity	2019-01-09	322/16969	0.158412	0.164069	0.0535979	NRIP3	1
GO:0003682	chromatin binding	2019-01-09	437/16969	0.209325	0.212997	0.0695817	ESR1	1
GO:0003712	transcription cofactor activity	2019-01-09	494/16969	0.23353	0.23353	0.0762894	GATA3	1
hsa00030	Pentose phosphate pathway	2019-01-01	30/859	0.0349243	0.0576251	0.0202193	FBP1	1
hsa00051	Fructose and mannose metabolism	2019-01-01	33/859	0.0384168	0.0576251	0.0202193	FBP1	1
hsa00010	Glycolysis / Gluconeogenesis	2019-01-01	68/859	0.0791618	0.0791618	0.0277761	FBP1	1
