# Supplementary material for: Identification of long-term survival-associated gene in breast cancer
Source: Aging (Albany NY). 2020 Oct 20;12(20):20332–49. doi: 10.18632/aging.103807 (PMC7655188; doi:10.18632/aging.103807)
Supplement: Supplementary Table 5 [file aging-12-103807-s006..xlsx]

## Sheet: DEG_sort_0.05_Symbol
Supplementary Table 5. Gene methylation level in GSE37754.
DEG	Symbol	logFC	AveExpr	t	P.Value	B
cg00012148	TINAG	0.497766	2.12463	2.28934	0.025472	-3.63751
cg00012317	FCGR1C	0.41545	0.484108	2.40848	0.019001	-3.50359
cg00018261	ZCCHC12	0.231324	-0.137513	2.49009	0.0154616	-3.40893
cg00019576	ZFP41	-0.176692	4.36131	-2.55397	0.0131182	-3.33323
cg00021108	RIN3	0.558552	-3.22346	2.41652	0.0186222	-3.49436
cg00021532	TFAP4	0.32945	-0.84888	2.7591	0.00760647	-3.08109
cg00023464	CARKD	0.228618	-0.242553	2.15971	0.0346644	-3.77725
cg00027637	ITPKB	-0.353013	1.19464	-2.32271	0.0234867	-3.60052
cg00028993	GLTSCR2	0.409729	1.6187	2.07846	0.0418059	-3.86154
cg00030774	FAM189A1	0.276304	-1.18497	2.53334	0.0138373	-3.35783
cg00032205	TSPYL5	0.586945	-0.89349	2.25347	0.0277709	-3.67682
cg00049323	LOC25845	0.254448	-2.04529	2.37781	0.0205081	-3.53855
cg00061059	TECR	0.154167	-2.83002	2.01196	0.0485683	-3.92859
cg00066668	GPR133	0.304922	3.39157	2.05453	0.0441395	-3.88588
cg00067141	ARHGAP11B	-0.725576	-1.70265	-2.28148	0.0259608	-3.64616
cg00067574	RHOQ	0.140046	-4.44451	2.16761	0.0340306	-3.76891
cg00068810	PARM1	0.298807	-1.93465	2.43856	0.0176196	-3.46897
cg00075467	TAF1B	0.311262	-0.354118	2.20247	0.0313537	-3.73186
cg00075844	RAD54L2	0.155506	1.69985	1.99932	0.0499549	-3.94113
cg00076313	ELFN1	0.530171	1.91224	2.18917	0.0323527	-3.74606
cg00083937	MAPK8IP2	0.353488	0.560126	2.42678	0.0181496	-3.48257
cg00087368	SIM1	-0.344632	0.191902	-2.28688	0.025624	-3.64022
cg00091060	ZNF17	0.32118	-2.03458	2.42771	0.0181071	-3.48149
cg00108873	KCNT1	0.305682	0.287225	2.09132	0.0405976	-3.84838
cg00108944	GLIPR1L2	0.277377	-2.45316	2.05788	0.0438064	-3.88249
cg00109356	SHISA2	0.518733	-2.67022	2.23602	0.028954	-3.69576
cg00110846	MAGI2	0.47219	2.26526	2.252	0.0278686	-3.67841
cg00113369	FLJ42875	0.242344	-0.1267	2.12654	0.0374399	-3.81197
cg00114029	DLGAP3	-0.435539	-0.258974	-2.14514	0.0358612	-3.79256
cg00118363	PXDNL	0.647036	2.18279	2.23572	0.0289743	-3.69608
cg00121148	GRAMD1C	0.157894	1.64704	2.61912	0.0110645	-3.25462
cg00124905	MMAA	-0.119071	-2.8838	-2.08536	0.0411538	-3.85449
cg00126034	WNT3	0.480844	-2.24394	2.1502	0.0354416	-3.78725
cg00126498	ULBP1	-0.249076	1.56695	-2.16216	0.034467	-3.77467
cg00128766	KIAA0494	0.113638	-3.04248	2.1489	0.0355486	-3.78861
cg00128805	SRP14	0.0819669	-3.08343	2.02652	0.0470124	-3.91407
cg00132623	C8orf37	-0.132559	-3.30474	-2.14045	0.036254	-3.79747
cg00133136	MYT1	0.386676	0.411464	2.94097	0.00459238	-2.84665
cg00142036	SEPHS1	0.484642	-0.747322	2.42302	0.0183213	-3.48689
cg00143045	RPRM	0.393715	-3.44229	2.44018	0.0175477	-3.46709
cg00151170	DOK6	0.566461	2.45028	2.11116	0.0387916	-3.82793
cg00152768	TMEM115	-0.0992298	-3.38222	-2.0581	0.0437837	-3.88226
cg00153543	KCNG4	0.27852	0.832751	2.27477	0.0263845	-3.65353
cg00154982	KDM4A	0.0925164	-4.52391	2.47407	0.0161052	-3.42769
cg00155063	TNFRSF1B	-0.662496	-1.06819	-2.27364	0.0264562	-3.65477
cg00155879	MYO3A	0.227143	-1.04807	2.05739	0.0438545	-3.88298
cg00156118	TCF7L1	-0.394706	0.171583	-2.39088	0.019853	-3.52369
cg00158081	CCDC11	0.135155	3.24622	2.22775	0.02953	-3.7047
cg00161225	P2RX1	-0.476659	0.556338	-2.35664	0.02161	-3.56249
cg00173785	HERC1	0.110689	-2.43015	2.04815	0.0447797	-3.89232
cg00183886	USP46	0.458487	0.557107	2.31228	0.0240916	-3.61212
cg00186701	TSPYL5	0.406448	-0.584006	2.31929	0.0236838	-3.60433
cg00201414	THSD1P	0.479268	-2.39183	2.06119	0.0434789	-3.87913
cg00211174	MCM2	0.376361	-0.482478	2.02779	0.0468785	-3.91279
cg00220455	TBC1D10C	-0.333678	0.527359	-2.06147	0.0434511	-3.87884
cg00222801	NOL10	0.211742	0.454597	2.67424	0.00956041	-3.18704
cg00223900	BAT5	0.113221	-4.2403	2.48789	0.0155487	-3.41152
cg00231519	C10orf46	-0.868247	2.36498	-2.18239	0.0328722	-3.75326
cg00234261	WDR86	-0.409862	-1.42604	-2.18705	0.032514	-3.74831
cg00236261	CCDC3	-0.605932	2.58256	-2.18932	0.0323413	-3.7459
cg00240205	ANTXR1	-0.373886	1.59062	-2.13647	0.0365899	-3.80163
cg00246402	FRMD4A	-0.166608	2.9648	-2.32808	0.0231803	-3.59453
cg00247094	TBC1D16	-0.691789	2.11449	-2.1829	0.0328331	-3.75272
cg00248856	CCND1	-0.233843	1.30213	-2.37201	0.0208051	-3.54513
cg00249576	ZSCAN23	0.483949	2.05506	2.28662	0.0256403	-3.64051
cg00257296	MSI1	-0.380196	-0.123441	-2.0975	0.0400268	-3.84202
cg00261569	C3orf1	0.414069	-0.716485	3.17567	0.00232814	-2.53039
cg00263856	ZNF519	0.311018	0.459992	2.07595	0.042046	-3.86411
cg00272992	C20orf107	-0.353781	2.559	-2.05863	0.0437318	-3.88173
cg00278329	COX6A2	-0.302802	2.51262	-2.80467	0.00671541	-3.02327
cg00278547	HOXD3	-0.398455	1.16516	-2.43044	0.0179833	-3.47835
cg00283472	DCHS1	0.577155	1.00494	2.09782	0.039998	-3.8417
cg00287536	PARD3	-0.502474	1.53763	-2.23464	0.0290492	-3.69725
cg00297966	NSMCE2	0.517087	0.542706	2.13184	0.0369844	-3.80646
cg00308438	TGFBR3	0.347363	1.74538	2.24939	0.0280431	-3.68125
cg00310968	SPAG17	-0.660037	-2.48918	-2.13082	0.0370716	-3.80752
cg00316478	ACSF3	0.406064	0.184229	2.33105	0.0230127	-3.59121
cg00322486	ELAVL4	0.279288	1.62296	2.18783	0.0324547	-3.74748
cg00331616	MPHOSPH8	0.350807	0.894923	2.49712	0.0151863	-3.40067
cg00341742	RPRM	0.441233	-2.39341	3.05531	0.0033112	-2.69442
cg00355784	KIAA0430	-0.130437	3.01283	-2.45851	0.0167538	-3.44583
cg00366837	JUNB	0.134996	-4.21912	2.10688	0.0391754	-3.83236
cg00367424	HCCA2	0.296884	0.196766	2.50504	0.0148817	-3.39134
cg00369241	IFITM5	0.685028	1.94133	2.53732	0.0136958	-3.35309
cg00382999	NCK1	0.523362	-0.758306	2.20143	0.0314305	-3.73297
cg00394712	NUDT17	0.0910833	-2.87075	2.11908	0.0380901	-3.81972
cg00397127	ADAMTS10	0.310432	-1.67281	2.39297	0.0197502	-3.52131
cg00397714	TMEFF2	0.406977	2.03203	2.21008	0.0307944	-3.72371
cg00400334	ATOH8	0.212943	-2.82395	2.0267	0.0469937	-3.91389
cg00412805	KBTBD5	-0.214254	2.74151	-2.05093	0.0444998	-3.88952
cg00414835	GDF10	-0.297512	0.297468	-2.14878	0.0355586	-3.78874
cg00417071	TSPAN5	-0.181914	2.10008	-2.28794	0.0255583	-3.63905
cg00419117	C1orf69	0.429033	0.82666	2.12481	0.0375901	-3.81378
cg00426968	GNG8	0.338205	-1.93016	3.73985	0.000403825	-1.71672
cg00432049	ULBP3	-0.338566	1.12529	-2.12507	0.0375675	-3.8135
cg00432369	TOX	0.52673	2.48867	2.05594	0.0439982	-3.88444
cg00435723	CDH15	0.377575	1.31659	2.07164	0.04246	-3.8685
cg00442814	ZNF704	0.280703	-2.59515	2.22865	0.0294667	-3.70373
cg00448875	RAB6B	-0.52827	0.899235	-3.11462	0.00278636	-2.61406
cg00457155	SPTY2D1	0.553012	1.20634	2.35115	0.0219046	-3.56868
cg00458927	CCT4	0.578227	2.9004	2.11255	0.0386673	-3.82649
cg00459795	ZNF514	0.122943	-4.40614	2.18354	0.0327835	-3.75204
cg00462525	TBR1	0.366156	-1.77225	2.08378	0.041302	-3.8561
cg00463507	CLSPN	0.0708773	-2.69934	2.02672	0.0469907	-3.91386
cg00470934	MRPL48	-0.0803101	-4.02365	-2.04599	0.0449981	-3.8945
cg00477157	NBEAL1	0.104402	-2.84446	2.15833	0.0347767	-3.77871
cg00478599	SLAIN1	0.406828	-3.46779	2.011	0.0486727	-3.92955
cg00481161	SIDT1	-0.289166	-1.83564	-2.33631	0.0227177	-3.58532
cg00483994	SLC16A14	0.114936	2.98752	2.00335	0.049509	-3.93714
cg00487456	SHC2	0.268648	3.32407	2.00221	0.0496343	-3.93827
cg00490256	SLC25A33	0.184766	-4.33017	2.0314	0.0465002	-3.90917
cg00492341	MMEL1	0.344823	0.418156	2.01986	0.0477181	-3.92072
cg00501628	LDHB	0.443946	-2.30792	2.37803	0.0204971	-3.5383
cg00503920	TRRAP	-0.114638	3.49511	-2.10381	0.0394519	-3.83552
cg00505936	HAS3	0.142355	-2.90755	2.00938	0.0488481	-3.93115
cg00509207	TSPAN11	-0.264914	1.26051	-2.04963	0.0446302	-3.89083
cg00512872	CYTH3	-0.354255	0.850771	-2.19232	0.0321135	-3.7427
cg00522056	RPRM	0.470577	-4.29435	2.2881	0.0255488	-3.63888
cg00523812	TSGA14	0.123545	-4.52809	2.17019	0.0338264	-3.76619
cg00533182	PPP1R16A	-0.355117	0.167418	-2.0806	0.0416026	-3.85936
cg00535466	ZC3H8	0.348399	2.00418	2.10072	0.0397328	-3.83871
cg00542402	RNF141	-0.0980157	-2.72372	-2.03702	0.0459168	-3.90353
cg00554421	INTS1	-0.192299	1.12325	-2.02137	0.0475576	-3.91921
cg00562504	DIP2C	-0.346102	2.29011	-2.53046	0.0139404	-3.36125
cg00563845	PXK	0.295361	-1.3009	2.24079	0.0286259	-3.69059
cg00564163	STEAP4	0.410209	-0.844063	2.02891	0.0467604	-3.91167
cg00567190	C1orf97	0.413997	-2.26635	3.61823	0.000596961	-1.89769
cg00586537	FAM65A	0.381474	-3.46303	2.33193	0.0229629	-3.59023
cg00594866	CXCR7	0.309201	-4.19707	3.01481	0.00372115	-2.74876
cg00599273	CDK4	0.213131	-2.46918	2.00617	0.0491992	-3.93434
cg00607058	OSBP2	0.613542	-0.576971	2.59559	0.0117699	-3.28318
cg00608779	PRRX2	-0.437434	1.32861	-2.3436	0.0223148	-3.57715
cg00609834	SPON1	-0.326292	-0.967319	-2.21684	0.0303049	-3.71644
cg00621913	PCSK2	0.286418	-3.24191	2.13671	0.0365694	-3.80138
cg00623328	RAB43	0.158233	-2.88878	2.66046	0.00991776	-3.20402
cg00624212	NBEAL2	-0.107536	-3.24847	-2.01875	0.0478369	-3.92183
cg00624410	CPNE2	0.310162	0.885975	2.00008	0.0498705	-3.94038
cg00625110	FTO	-0.28354	1.66709	-2.22709	0.0295764	-3.70541
cg00630399	MUC21	-0.159961	3.29524	-2.50927	0.0147212	-3.38635
cg00635356	PCDHB14	-0.17721	2.13898	-2.11679	0.0382921	-3.8221
cg00635944	C16orf53	0.122186	-3.27211	2.72623	0.00831516	-3.1224
cg00644447	DIP2C	-0.24691	2.27867	-2.25299	0.0278024	-3.67733
cg00644554	DTX1	0.461883	1.66987	2.42921	0.0180391	-3.47977
cg00647022	UNC13A	0.341182	0.771703	2.05712	0.0438813	-3.88325
cg00647403	GGA2	0.10382	-3.31125	2.49585	0.0152355	-3.40216
cg00648125	NUDT10	0.245591	-0.527898	2.19475	0.0319299	-3.7401
cg00650410	TTLL8	0.427313	2.41952	2.36982	0.0209179	-3.5476
cg00651497	FBN1	-0.405605	-0.360919	-2.03793	0.0458234	-3.90262
cg00657508	LOC349114	0.327053	1.25194	2.03487	0.0461395	-3.9057
cg00658151	SDC3	-0.253507	0.149507	-2.01163	0.0486039	-3.92892
cg00658740	NCK1	0.303964	-0.166091	2.04075	0.0455335	-3.89979
cg00666640	OR2T12	0.421682	0.389672	2.1704	0.0338097	-3.76597
cg00668150	KIAA0664	0.530273	-0.834047	2.20189	0.0313969	-3.73248
cg00679281	SBK1	0.297501	0.518399	2.47861	0.0159207	-3.42239
cg00683496	SNTB1	0.564064	1.62769	2.04025	0.0455841	-3.90028
cg00689612	TIMP2	-0.34612	1.40882	-2.24716	0.0281936	-3.68368
cg00691625	NR5A1	-0.23012	1.23689	-2.5226	0.0142255	-3.37058
cg00692088	AGPAT4	-0.658816	0.883862	-2.8245	0.00635857	-2.99791
cg00694726	MYT1	0.684929	1.87447	2.52796	0.0140304	-3.36422
cg00697880	OSBPL10	-0.117946	3.17363	-2.12876	0.0372485	-3.80967
cg00699831	SCD	-0.258611	2.26193	-2.05208	0.0443846	-3.88836
cg00702561	PRRX2	-0.44051	1.69403	-2.51384	0.0145495	-3.38095
cg00711327	SSB	0.176737	3.43935	2.27936	0.0260941	-3.64849
cg00711711	CREB3L2	-0.071564	-2.60559	-2.29839	0.0249196	-3.62752
cg00712593	CACNA2D1	0.635393	2.5812	2.12697	0.0374026	-3.81152
cg00713055	TRIM26	-0.135458	2.18078	-2.66534	0.00978989	-3.19802
cg00714888	CROCC	0.385389	-1.86815	2.0642	0.0431827	-3.87607
cg00723338	MYL5	0.395703	0.726794	2.35281	0.0218153	-3.56681
cg00731304	RNF144B	0.568738	1.11376	2.03181	0.0464575	-3.90876
cg00733385	ZNF775	-0.120391	2.37419	-2.09042	0.0406803	-3.84929
cg00737250	FLJ12825	0.367435	1.11441	2.04371	0.04523	-3.8968
cg00741259	ZDHHC17	-0.321392	2.88154	-2.06124	0.0434739	-3.87908
cg00744495	CAMSAP1	-0.108928	3.0159	-2.04664	0.0449327	-3.89385
cg00762659	TPRKB	0.462948	-2.20027	2.06605	0.0430028	-3.8742
cg00764840	LOC145814	-0.126625	1.28442	-2.25216	0.0278581	-3.67824
cg00767886	EHD4	-0.197496	2.31488	-2.24191	0.0285493	-3.68937
cg00780664	ZNF536	0.430563	1.02653	2.36849	0.020987	-3.54911
cg00782367	C10orf12	0.154686	2.85809	2.61858	0.0110804	-3.25529
cg00793992	OR2T3	0.542545	0.498054	2.04778	0.0448172	-3.8927
cg00797142	NBN	0.150448	2.34812	2.14791	0.0356307	-3.78965
cg00802855	GPR123	0.378176	0.71306	2.32615	0.0232902	-3.59669
cg00807877	KIAA0247	-0.191766	2.20726	-2.14066	0.0362357	-3.79724
cg00812799	IL17D	0.421485	0.64378	2.45728	0.0168063	-3.44727
cg00813142	PRDX4	0.164939	-0.388754	2.00241	0.0496125	-3.93807
cg00813603	SLC25A42	0.335562	-3.49064	2.33635	0.0227153	-3.58528
cg00815091	BSND	-0.322745	2.23884	-2.39253	0.0197721	-3.52182
cg00818680	TMCO7	0.213384	-0.835414	2.07078	0.0425434	-3.86938
cg00820961	KCNT1	0.52737	1.11791	2.37698	0.0205504	-3.53949
cg00820995	CACNG7	0.290842	-1.00607	2.06554	0.0430521	-3.87471
cg00825252	SMYD2	0.305168	-1.7679	2.14742	0.0356718	-3.79017
cg00832136	CXorf22	0.297954	-1.83762	2.07409	0.0422245	-3.86601
cg00833639	C7orf10	-0.44351	1.92627	-2.14634	0.0357615	-3.7913
cg00833989	GRID2	0.211087	-2.63314	2.13159	0.0370053	-3.80671
cg00844246	GPR123	0.620368	1.95271	2.29292	0.0252519	-3.63356
cg00871381	ATCAY	0.552509	1.48493	2.94273	0.00456964	-2.84434
cg00876127	BBS2	0.316682	-0.666146	2.37113	0.0208503	-3.54612
cg00898486	GRM4	-0.22357	1.96728	-2.36798	0.0210134	-3.54968
cg00902815	LMO7	-0.305613	1.71067	-2.13091	0.0370637	-3.80742
cg00905042	GALNT7	0.306814	1.55614	2.15337	0.0351814	-3.78393
cg00907008	CHL1	0.519641	1.83649	2.29927	0.024866	-3.62654
cg00907503	FOXJ3	0.331969	2.22646	2.26663	0.0269066	-3.66244
cg00908631	CDKN2C	0.431949	0.821646	2.10584	0.0392688	-3.83343
cg00917031	MEGF9	0.328688	-1.14498	3.13438	0.00262954	-2.58708
cg00924278	ADI1	-0.201439	3.06624	-2.52702	0.0140646	-3.36534
cg00931843	TIAM2	-0.261369	0.866207	-2.14669	0.0357316	-3.79093
cg00933835	ALLC	-0.39884	1.30289	-2.26706	0.0268791	-3.66198
cg00944433	PRMT6	0.239579	-0.877706	2.09718	0.040056	-3.84235
cg00954833	SHFM1	0.478024	2.33791	2.57245	0.0125033	-3.31108
cg00961640	SLC16A4	0.521873	0.172769	2.42935	0.0180323	-3.47959
cg00964710	BFAR	-0.0791533	-4.43609	-2.13656	0.036582	-3.80153
cg00965643	DCDC2B	0.28504	-0.0226718	2.06621	0.042987	-3.87403
cg00966411	DNAH2	0.260241	1.15921	2.04094	0.0455131	-3.89959
cg00971894	CTTNBP2	0.214781	-2.46023	2.26857	0.0267814	-3.66032
cg00974204	UACA	0.391444	0.055022	2.13536	0.0366843	-3.80279
cg00980978	WFDC2	0.280012	-2.41365	2.1965	0.0317987	-3.73824
cg00983437	TCF15	-0.384538	-1.36224	-2.61785	0.0111015	-3.25617
cg00989765	KDR	0.28952	-3.30622	2.05767	0.0438266	-3.88269
cg00999950	C4orf37	0.186554	-3.48077	2.16588	0.0341691	-3.77075
cg01005080	LHX8	-0.190618	-0.225009	-2.09466	0.0402877	-3.84494
cg01007305	GRID1	-0.345017	0.00792203	-2.52867	0.0140051	-3.36338
cg01010328	TTC24	-0.558057	1.82503	-2.62521	0.0108885	-3.24721
cg01011432	CABLES2	-0.226317	-2.52401	-2.34839	0.0220536	-3.57177
cg01015008	PSORS1C1	-0.245668	1.92973	-2.00421	0.0494143	-3.93629
cg01020978	MECOM	0.278409	2.24138	2.01577	0.0481566	-3.9248
cg01023242	HLX	-0.602258	2.47148	-2.44592	0.0172955	-3.46045
cg01023759	MC1R	0.388106	0.329702	2.57479	0.0124274	-3.30827
cg01034287	FAM189A1	0.360325	1.26834	2.20228	0.031368	-3.73207
cg01042334	OPLAH	0.374523	1.15359	2.02001	0.0477027	-3.92057
cg01049884	KIAA0146	-0.286923	3.92587	-3.14155	0.0025747	-2.57727
cg01052274	ZCCHC14	1.02533	2.01304	2.79509	0.00689428	-3.03547
cg01059116	GLIS1	-0.853107	-1.1121	-3.39148	0.00121395	-2.2273
cg01059290	C16orf75	0.0989001	-3.19265	2.21612	0.0303569	-3.71722
cg01060409	RAN	0.58712	1.71336	2.69033	0.00915774	-3.16712
cg01062470	KIF24	0.542011	1.27731	2.30499	0.0245231	-3.62021
cg01062834	KIAA1462	0.428182	-2.2348	2.71777	0.00850708	-3.13297
cg01065373	ARL4D	0.131823	-2.73446	2.04659	0.0449375	-3.8939
cg01069256	FAM164A	0.242913	-2.61172	2.13699	0.036546	-3.80109
cg01070272	PIP5K1C	-0.286386	-0.0099163	-2.25511	0.0276615	-3.67502
cg01070560	CSMD1	0.619655	1.62303	2.12804	0.0373105	-3.81041
cg01078147	SEMA6A	0.267048	-3.50067	2.16923	0.033902	-3.7672
cg01089001	GALNTL4	-0.355052	1.01106	-2.18329	0.0328032	-3.75231
cg01089639	JAK3	-0.388596	0.182188	-2.15557	0.0350008	-3.7816
cg01090161	GRM4	-0.279116	0.0386713	-2.88363	0.00539576	-2.92162
cg01094891	ZNF536	0.692754	0.963833	2.57095	0.0125523	-3.31288
cg01097102	DOCK7	-0.202525	2.34219	-2.06866	0.0427483	-3.87154
cg01126560	C9orf142	0.35826	-1.31304	2.63572	0.0105904	-3.23438
cg01127428	SYCP3	-0.120052	2.18434	-2.28463	0.025764	-3.6427
cg01132160	N4BP2	0.416064	1.87486	2.22773	0.0295315	-3.70472
cg01135165	MYH15	0.470167	1.09799	2.44148	0.0174904	-3.46559
cg01136183	TM7SF4	-0.409731	1.55448	-2.03666	0.0459537	-3.90389
cg01139696	GNA12	0.496463	2.11413	2.02935	0.0467152	-3.91123
cg01142096	ERICH1	0.337334	1.84053	2.72901	0.00825287	-3.11891
cg01150799	HADH	-0.292496	0.337471	-2.50143	0.0150196	-3.39559
cg01164202	LACTB2	0.426311	2.11976	2.77591	0.00726573	-3.05983
cg01171212	HOXD3	-0.19215	0.153928	-2.25207	0.027864	-3.67834
cg01174674	ZNF747	-0.187622	1.386	-3.05196	0.00334348	-2.69893
cg01182386	MPI	0.110945	-2.2778	2.26037	0.0273149	-3.66929
cg01191964	DYNC1H1	-0.114486	2.64565	-2.30499	0.0245231	-3.62021
cg01200376	CTHRC1	0.42448	3.07052	2.01485	0.0482563	-3.92572
cg01208614	FCHSD1	0.575591	1.15862	2.59619	0.0117514	-3.28245
cg01212326	POU2AF1	-0.401915	-0.412236	-2.4819	0.0157878	-3.41854
cg01219426	MAML2	-0.452797	0.210121	-2.15399	0.0351302	-3.78327
cg01226231	SRA1	0.17944	1.79637	2.11413	0.0385271	-3.82486
cg01228352	SELT	0.121734	4.02674	2.19621	0.0318202	-3.73855
cg01230491	FOXD4	-0.183433	-0.429793	-2.15952	0.0346805	-3.77746
cg01246982	HLA-DPB2	0.341783	0.402551	2.61949	0.0110539	-3.25418
cg01252104	GALNT9	0.345916	-0.0459708	2.38992	0.0199007	-3.52478
cg01261206	AP2A2	-0.352139	2.72455	-2.52799	0.0140295	-3.36418
cg01272599	ZNF846	0.366879	-1.34619	2.62752	0.0108223	-3.24439
cg01281911	FOXE3	-0.338042	-1.76023	-2.06284	0.0433166	-3.87745
cg01283289	ACSS3	0.418787	-1.79859	2.22302	0.0298636	-3.70979
cg01283834	UCP1	0.619823	-2.80668	2.00502	0.0493251	-3.93548
cg01288337	RIN3	-0.325381	1.30108	-2.01109	0.0486627	-3.92946
cg01289343	RASA3	-0.287407	0.364286	-2.25221	0.0278549	-3.67819
cg01297101	RPL19	0.186339	-2.45745	2.42153	0.0183902	-3.48861
cg01303183	C16orf68	0.390289	1.02008	2.14678	0.0357245	-3.79084
cg01317752	VCX	0.666643	1.9499	2.19253	0.0320973	-3.74247
cg01318737	ZNF57	-0.121157	2.56266	-2.39728	0.0195394	-3.51639
cg01321816	BLM	-0.18874	2.32021	-2.27116	0.0266149	-3.65749
cg01325840	CBR3	0.150521	-2.48702	2.24975	0.0280189	-3.68086
cg01330880	SOCS1	0.146737	-3.62648	2.42259	0.0183413	-3.48739
cg01334209	KRTAP9-2	0.481235	0.785451	2.0467	0.0449265	-3.89379
cg01336781	NKX2-6	-0.535491	-1.48706	-2.1888	0.0323811	-3.74645
cg01352705	XRCC5	0.260745	-2.87448	2.0019	0.0496688	-3.93858
cg01355753	SEPHS2	0.414993	-0.480913	2.10556	0.0392941	-3.83372
cg01358620	HEATR5A	-0.48722	1.15523	-2.55794	0.0129841	-3.32849
cg01366941	SNX29	-0.260871	2.49261	-2.26554	0.0269775	-3.66364
cg01367719	LOC144571	0.305187	0.352826	2.31324	0.0240358	-3.61106
cg01382502	EEF2K	-0.466443	1.15499	-2.00727	0.0490788	-3.93325
cg01384495	C8orf74	-0.422056	2.48826	-2.87006	0.00560392	-2.93922
cg01390564	PRSS36	-0.123521	0.221914	-2.79499	0.00689628	-3.03561
cg01395690	SIGLEC16	0.298332	1.01035	2.05578	0.0440146	-3.88461
cg01396022	CAMK1	0.22292	-1.58924	2.065	0.0431054	-3.87526
cg01396391	SMYD3	0.280893	-4.11775	2.15719	0.0348691	-3.7799
cg01411366	SLC9A10	0.33769	-1.36801	2.42958	0.0180221	-3.47933
cg01421902	ZNF665	0.57769	1.65256	2.73108	0.00820689	-3.11632
cg01427436	GALNT7	-0.217893	-2.48974	-2.27573	0.0263236	-3.65248
cg01436771	SRM	0.145976	-2.62777	2.86031	0.00575814	-2.95183
cg01439408	CCL24	-0.286416	0.460487	-2.24975	0.0280191	-3.68086
cg01442600	TIAM1	-0.141226	3.32729	-2.3588	0.0214954	-3.56006
cg01444397	PER3	0.522627	-3.43367	2.48111	0.0158194	-3.41945
cg01446627	ADARB2	0.592606	0.110852	2.36356	0.0212442	-3.55468
cg01446963	MRPL28	0.321164	-2.25781	2.08045	0.0416172	-3.85951
cg01479912	PDIA6	0.519518	-2.48725	2.03531	0.046094	-3.90525
cg01481690	DSCR3	0.306809	-0.372915	2.39926	0.0194431	-3.51413
cg01493009	FOXO1	0.388015	2.29722	2.05154	0.0444381	-3.8889
cg01508415	SCAF1	-0.103085	3.16385	-2.21515	0.0304269	-3.71827
cg01513978	DEGS2	0.245385	0.269335	2.29284	0.0252571	-3.63365
cg01520924	HSPA2	0.220647	-2.35256	2.04043	0.0455662	-3.90011
cg01520956	FAM47E	0.352572	-1.44181	2.44782	0.0172126	-3.45824
cg01524893	RICH2	-0.461823	-1.5354	-2.102	0.0396158	-3.83738
cg01536884	NR2F1	-0.384807	1.91553	-2.17269	0.0336288	-3.76355
cg01566283	ZNF192	0.435904	-3.38916	2.43128	0.0179454	-3.47738
cg01567853	FAM164A	0.241961	-3.23622	2.01224	0.0485378	-3.92831
cg01577933	GRIK3	-0.379984	-0.711785	-2.17958	0.0330897	-3.75624
cg01578875	ZNF827	-0.259307	2.98171	-2.06354	0.0432481	-3.87674
cg01587771	LYPLA2	0.0826781	-3.13223	2.19881	0.0316257	-3.73577
cg01590753	VEGFC	0.554401	-2.24219	2.50488	0.0148877	-3.39153
cg01603396	MSX2	-0.316868	0.0919189	-2.5491	0.0132849	-3.33905
cg01612095	CYBA	0.444513	2.44642	2.21782	0.0302351	-3.7154
cg01612730	C6orf138	0.27486	-1.79912	2.03184	0.0464546	-3.90874
cg01614478	C9orf64	0.27	-2.06614	2.61001	0.011333	-3.2657
cg01619045	ZNF100	0.457782	2.14284	2.2426	0.0285026	-3.68863
cg01626477	LBH	0.198889	-3.86903	2.1184	0.0381503	-3.82043
cg01637537	FAM83F	-0.279375	1.09639	-2.46537	0.016465	-3.43784
cg01640765	LOC390858	-0.32334	2.89898	-2.03096	0.0465459	-3.90961
cg01642084	LOC150568	0.363267	2.10577	2.11221	0.0386981	-3.82685
cg01642723	GALNT9	0.383936	1.30904	2.12616	0.037473	-3.81237
cg01644972	EIF1AY	0.121459	0.0424392	2.72197	0.00841124	-3.12772
cg01654820	EMP2	0.323416	-0.169056	2.14156	0.0361602	-3.7963
cg01656221	MIR548N	0.305332	-2.63319	2.30677	0.0244174	-3.61824
cg01656970	C1orf192	0.137734	2.9825	2.30105	0.0247589	-3.62457
cg01666600	KCNJ12	-0.526764	-2.49055	-2.02982	0.0466653	-3.91076
cg01670771	STX1B	0.547127	0.662229	3.55508	0.00072929	-1.99055
cg01673674	GDF6	-0.398038	0.523973	-2.39305	0.0197464	-3.52122
cg01682021	LOC441046	0.392243	-3.10595	2.42312	0.018317	-3.48678
cg01685246	ZNF768	0.170152	-4.33489	3.54232	0.000759203	-2.00921
cg01685644	MBLAC1	0.107843	-3.83854	2.28608	0.0256735	-3.6411
cg01688141	NKX3-1	0.204851	-2.77501	2.27787	0.0261878	-3.65013
cg01690573	RMND1	0.324189	1.81582	2.49732	0.0151785	-3.40043
cg01695225	EMX1	-0.483242	-0.50532	-2.21754	0.0302548	-3.71569
cg01699906	MAML2	0.276269	-2.96622	2.13618	0.0366143	-3.80193
cg01709846	TEKT5	-0.272737	1.72421	-2.14491	0.0358799	-3.7928
cg01713582	C4orf51	0.208437	0.893857	2.1685	0.0339605	-3.76798
cg01729820	RAI1	0.114496	-4.22026	2.25259	0.0278295	-3.67777
cg01731341	FGF6	0.423564	0.88073	2.08172	0.0414963	-3.85821
cg01742370	C1orf69	-0.214917	2.89805	-2.4705	0.016252	-3.43186
cg01744215	USP7	0.126419	-4.24945	2.31538	0.0239106	-3.60868
cg01746514	LRRC16B	0.141649	-3.12501	2.055	0.0440922	-3.8854
cg01748275	UPF1	-0.114766	3.39924	-2.3494	0.0219991	-3.57064
cg01748832	KIAA1751	0.269953	3.36735	2.24264	0.0284995	-3.68858
cg01751181	OPCML	0.53576	1.20596	2.78115	0.00716259	-3.05319
cg01756063	RDH14	-0.148243	1.29364	-2.25222	0.0278537	-3.67817
cg01756730	NAB2	0.296654	-4.07852	2.5137	0.0145546	-3.38111
cg01758539	RPS20	-0.195161	2.59144	-2.95925	0.00436061	-2.82256
cg01763057	ILKAP	0.211046	-2.66561	2.34721	0.0221175	-3.57309
cg01768840	RNF166	-0.304685	0.0240422	-2.00863	0.0489299	-3.9319
cg01778114	MREG	-0.095913	-3.62648	-2.00523	0.0493018	-3.93527
cg01794245	KIAA1688	-0.342413	1.97314	-2.1248	0.0375907	-3.81378
cg01796104	CNKSR3	0.234021	-3.32255	2.04186	0.0454193	-3.89866
cg01798024	GLT1D1	0.506037	0.758014	2.61937	0.0110573	-3.25432
cg01808545	TMEFF2	0.372495	-2.56144	2.11298	0.0386298	-3.82605
cg01819306	IL7	0.189852	-2.89097	2.05993	0.0436028	-3.8804
cg01820273	C6orf127	0.453918	-0.0283458	2.43636	0.0177172	-3.4715
cg01835725	PCBP4	0.357348	-0.390125	2.70223	0.00887025	-3.15234
cg01836096	C8ORFK29	0.545074	1.08383	2.41071	0.0188953	-3.50103
cg01838004	KIAA1529	0.413847	0.00477432	2.05866	0.0437285	-3.88169
cg01838544	GPR114	-0.350281	0.635444	-2.19247	0.0321021	-3.74254
cg01853216	ABHD8	0.346717	-0.337068	2.27505	0.026367	-3.65323
cg01854389	ITFG3	-0.123167	2.8064	-2.07187	0.0424379	-3.86827
cg01861031	USE1	0.0927271	-4.25344	2.37653	0.0205733	-3.54
cg01861349	C15orf17	-0.146423	-2.81685	-2.07383	0.0422486	-3.86627
cg01862363	NTN1	-0.262342	1.39098	-2.03035	0.0466103	-3.91023
cg01870619	ZFR	0.0973781	-3.6084	2.01734	0.0479882	-3.92323
cg01878750	GNA12	-0.0983227	3.51413	-2.40966	0.0189447	-3.50223
cg01897562	CXCL3	0.267976	-2.91474	2.0619	0.0434092	-3.87841
cg01904183	TRAM1L1	0.268203	-2.73586	2.42709	0.0181352	-3.4822
cg01906637	RNASE13	-0.257715	1.3901	-2.46952	0.0162925	-3.433
cg01906709	C3orf59	0.116747	-4.00068	2.39759	0.0195243	-3.51604
cg01910741	PPIL1	0.414169	0.640896	2.36999	0.0209094	-3.54742
cg01923549	USP49	1.08273	4.04499	2.54804	0.0133215	-3.34032
cg01928820	PTCRA	-0.439774	0.727068	-2.74862	0.00782609	-3.09429
cg01939336	KCNN2	0.370953	-2.72794	2.04956	0.0446381	-3.8909
cg01940943	C17orf71	0.205114	-2.84268	2.20422	0.0312241	-3.72998
cg01945624	SH3TC1	-0.378895	0.727094	-2.08455	0.0412301	-3.85532
cg01948201	HSPC159	0.202151	-1.40771	2.01142	0.0486268	-3.92913
cg01958550	ESRRG	0.30716	-2.5572	2.15955	0.0346781	-3.77742
cg01963754	C13orf16	0.711834	1.28276	2.10686	0.0391764	-3.83237
cg01966160	PEBP4	-0.483994	1.94502	-2.10386	0.039448	-3.83548
cg01972688	C11orf94	0.337408	0.174153	3.25029	0.00186392	-2.42684
cg01978237	SIM1	-0.399562	0.372321	-2.02977	0.0466709	-3.91081
cg02008826	NKX6-3	-0.304438	-0.112418	-2.43285	0.0178746	-3.47556
cg02016419	TEKT3	0.282841	-0.753142	2.20812	0.0309377	-3.72581
cg02016987	HERC2	0.294293	0.869311	2.02393	0.0472854	-3.91665
cg02018176	KIAA1530	-0.370227	2.00075	-2.2832	0.0258532	-3.64427
cg02018902	ANKRD34C	0.264346	-2.25433	2.14671	0.0357303	-3.79091
cg02023345	TMEM26	0.660938	-2.87889	2.21762	0.0302492	-3.71561
cg02025270	HSH2D	-0.326852	0.516655	-2.14578	0.0358077	-3.79189
cg02032449	C15orf17	-0.121835	2.53865	-2.00762	0.0490401	-3.9329
cg02042997	APOB48R	-0.454847	0.408354	-2.32068	0.0236035	-3.60278
cg02057134	ULK1	0.462103	0.537848	2.64369	0.0103693	-3.22462
cg02061711	DIP2C	-0.320171	1.29106	-2.09442	0.0403105	-3.84519
cg02071292	GLIPR1L2	0.450575	-3.46291	2.206	0.0310934	-3.72808
cg02072170	FAM43A	-0.400703	-1.56841	-2.59106	0.0119103	-3.28865
cg02079377	SLC16A12	0.815889	-3.27409	2.7514	0.00776722	-3.09079
cg02083536	PANK4	-0.201133	2.36814	-2.41572	0.01866	-3.49529
cg02083539	DOC2A	0.0920915	-4.54145	2.27246	0.0265321	-3.65607
cg02092141	RBM4	-0.354755	2.18544	-2.29748	0.0249742	-3.62852
cg02120470	INSL5	0.438827	1.56177	2.30056	0.0247887	-3.62512
cg02120739	PM20D2	0.482901	-2.89699	2.51726	0.0144224	-3.37691
cg02122540	FLJ43860	0.418475	-0.251967	2.96024	0.00434834	-2.82125
cg02128651	PLSCR2	0.713346	-2.67214	2.63531	0.0106019	-3.23488
cg02133234	NRBP2	0.429499	0.0536959	2.19364	0.0320138	-3.74129
cg02138082	AGRN	-0.193445	2.67598	-2.56562	0.0127274	-3.31928
cg02147905	CINP	-0.167025	2.953	-2.97846	0.00412882	-2.79714
cg02176428	ZNF665	0.431816	1.82361	2.27688	0.0262506	-3.65122
cg02179341	MYT1L	0.398734	0.579982	2.07436	0.0421981	-3.86573
cg02184540	NCRNA00171	0.700176	2.02922	2.24646	0.0282406	-3.68443
cg02184673	ASAM	-0.718634	-1.00023	-2.12617	0.0374725	-3.81236
cg02206767	DRG2	0.472755	0.567127	2.13914	0.0363637	-3.79883
cg02219116	C9orf167	0.762204	1.83838	2.39164	0.0198157	-3.52282
cg02221750	ANKLE1	0.306162	-2.68528	2.19461	0.0319408	-3.74026
cg02228568	TPST1	-0.182271	2.16819	-2.35414	0.0217436	-3.5653
cg02229095	ZNF34	0.317102	-1.44923	2.05213	0.0443795	-3.88831
cg02232542	KIAA1984	0.214316	-1.79158	2.01371	0.0483792	-3.92685
cg02233414	NFKBID	0.0878093	-3.00976	2.13164	0.0370011	-3.80666
cg02234043	GAK	-0.0847479	3.24256	-2.07611	0.0420304	-3.86394
cg02239049	MAML2	0.325135	-2.83936	2.03915	0.0456978	-3.9014
cg02239377	FDX1	-0.298252	0.999826	-2.07637	0.0420059	-3.86368
cg02241481	IMPACT	0.144651	-3.77162	2.42109	0.0184103	-3.48911
cg02246683	NCOA2	-0.12048	2.60699	-2.43646	0.0177131	-3.4714
cg02246992	ATAD5	0.435835	0.221992	2.19837	0.0316587	-3.73624
cg02270010	RNF44	-0.189239	0.0548463	-2.04168	0.0454378	-3.89885
cg02272207	PLEKHH3	0.0778537	-4.96229	2.04193	0.0454122	-3.89859
cg02273647	C14orf106	0.280614	-2.61416	2.1635	0.0343597	-3.77326
cg02277235	ZFYVE21	-0.154278	3.08165	-2.33889	0.0225743	-3.58243
cg02277326	HERC2	0.128692	4.25337	2.51903	0.0143569	-3.37481
cg02278071	DUSP18	0.0967978	-3.84846	2.04788	0.044807	-3.89259
cg02278307	ZNF333	-0.0799523	-2.51524	-2.14041	0.0362571	-3.79751
cg02282200	ZNF783	-0.143073	2.80162	-2.34037	0.0224928	-3.58078
cg02283931	SDR42E1	0.293546	-0.655088	2.02503	0.0471698	-3.91556
cg02295078	ZNF287	0.571373	-2.9882	2.87568	0.00551675	-2.93193
cg02302582	DKK1	0.319455	-1.97918	2.3408	0.0224688	-3.58029
cg02306493	FARSA	0.499087	1.11529	2.3039	0.0245883	-3.62142
cg02307597	ABHD8	0.518911	1.51417	2.44507	0.0173326	-3.46143
cg02309594	HCRTR1	0.336588	1.7145	2.36878	0.020972	-3.54878
cg02319318	ZNF704	0.494203	-1.04567	2.30816	0.0243345	-3.61669
cg02345321	TACC1	0.286161	0.0839767	2.0675	0.0428612	-3.87272
cg02362978	USP43	0.465749	1.21098	2.31096	0.0241694	-3.61359
cg02365967	HERC2	0.62005	2.6174	2.35365	0.0217699	-3.56586
cg02366534	ME1	0.407592	-2.51193	2.05677	0.0439163	-3.88361
cg02366772	FLJ23834	-0.464465	0.825242	-2.05645	0.0439481	-3.88393
cg02368096	NPTX2	0.292272	-1.5	2.36822	0.021001	-3.54941
cg02370373	TPST2	0.10289	-4.15102	2.22815	0.0295017	-3.70426
cg02371376	PSTPIP1	-0.457175	-0.465588	-2.32742	0.0232176	-3.59526
cg02373152	PAQR8	0.622765	-1.5821	2.01021	0.0487577	-3.93033
cg02374996	GADD45G	-0.239438	-2.64013	-2.48446	0.015685	-3.41553
cg02375320	SFRS7	0.519016	-1.58027	2.82798	0.00629785	-2.99346
cg02393907	ACTR3C	0.218155	1.08679	2.02685	0.0469769	-3.91373
cg02394978	FHAD1	0.510497	1.61576	2.35988	0.0214383	-3.55884
cg02400092	ZBTB44	0.463836	-1.19081	2.41311	0.0187819	-3.49827
cg02407415	PRR25	-0.688386	-2.4596	-2.16535	0.0342111	-3.7713
cg02410830	LYPLA1	-0.208485	1.3074	-3.01159	0.00375571	-2.75306
cg02414045	SMAD3	-0.126211	3.37604	-2.18367	0.0327733	-3.7519
cg02414981	PDGFRB	-0.209092	1.91756	-2.05817	0.0437771	-3.88219
cg02415057	GLIPR1L2	0.500385	-2.97721	2.0339	0.0462405	-3.90667
cg02416510	RGS20	-0.332878	0.237456	-2.37551	0.0206256	-3.54116
cg02425140	C17orf97	-0.408173	-4.13835	-2.3438	0.0223039	-3.57693
cg02431260	ESAM	0.364765	-0.945655	2.0058	0.0492401	-3.93471
cg02436788	TEKT3	0.408705	-4.34928	2.05685	0.0439081	-3.88353
cg02446003	CTNNAL1	0.0786258	-3.14697	2.50726	0.0147972	-3.38872
cg02454982	LOC388588	0.115391	-3.65072	2.26249	0.027176	-3.66697
cg02457319	KCNT1	0.314997	-0.313081	2.22765	0.0295365	-3.7048
cg02458396	PCGF3	-0.163	2.11397	-2.01223	0.0485392	-3.92832
cg02458910	FAM151B	0.440298	1.94858	2.30695	0.0244062	-3.61803
cg02474858	ASCC2	0.316447	-0.293202	2.18473	0.0326925	-3.75078
cg02482233	GBAS	0.419864	-1.17258	2.55143	0.0132051	-3.33627
cg02487654	TSGA14	0.23453	-4.38495	2.1511	0.0353671	-3.7863
cg02492740	UBQLN2	0.243889	-0.795894	2.32654	0.0232678	-3.59625
cg02492873	DNAJC27	0.477554	0.260873	3.05086	0.00335414	-2.70042
cg02498382	SNRNP27	0.336725	1.62465	2.056	0.0439928	-3.88439
cg02501882	NEK10	-0.212419	-2.92189	-2.0765	0.0419929	-3.86354
cg02502145	SOS1	-1.85312	-0.82429	-2.93657	0.00464995	-2.85244
cg02504820	GLT1D1	0.559842	0.546504	2.14833	0.0355962	-3.78921
cg02512559	CFDP1	-0.396485	1.47388	-2.47728	0.0159745	-3.42394
cg02512764	GAK	-0.0880155	2.89243	-2.08859	0.0408514	-3.85118
cg02515467	THUMPD1	0.515937	1.03703	2.68802	0.00921478	-3.16999
cg02525756	RAB42	0.247549	-0.955407	2.31953	0.0236695	-3.60406
cg02530824	PF4	0.363998	-0.565324	2.29659	0.0250282	-3.6295
cg02531227	GLT1D1	0.373815	-0.00739797	2.33099	0.0230155	-3.59127
cg02533239	PLCG2	-0.481572	2.58711	-2.79504	0.00689523	-3.03554
cg02538562	RFX7	0.192158	1.66569	2.17376	0.0335449	-3.76242
cg02554317	ORC6L	0.316639	2.12941	2.40856	0.0189971	-3.5035
cg02567344	FAM20B	0.384364	2.24477	2.22501	0.0297229	-3.70765
cg02579332	HTR5A	0.681531	1.56046	2.23439	0.0290663	-3.69752
cg02583247	FGF6	0.537788	0.946862	2.01446	0.0482984	-3.92611
cg02584459	SLC16A12	0.68057	-2.86976	2.28337	0.0258428	-3.64409
cg02585724	KIAA1199	-0.346471	2.33222	-2.01444	0.0483001	-3.92612
cg02588809	RASA3	-0.596996	1.19346	-2.44492	0.0173391	-3.4616
cg02594677	DIP2C	-0.405811	1.84095	-2.33387	0.022854	-3.58806
cg02603003	MYH3	0.632907	2.29201	2.40372	0.019228	-3.50903
cg02607772	FSTL4	-0.286834	1.91468	-2.05938	0.0436572	-3.88096
cg02616315	WSCD1	0.663959	1.99315	2.12236	0.0378033	-3.81632
cg02619495	WDR8	-0.101331	2.45883	-2.14601	0.0357883	-3.79164
cg02627887	LOC645323	0.364552	-2.6903	2.22534	0.0296995	-3.7073
cg02634414	SLC16A12	0.266571	-0.881783	2.2493	0.0280495	-3.68135
cg02639294	ZNF48	0.165699	-2.71348	2.83604	0.00615908	-2.98311
cg02641560	RCAN3	-0.0809407	-3.26529	-2.10734	0.0391339	-3.83188
cg02647684	RNASE12	0.537799	1.74441	2.21822	0.030206	-3.71496
cg02653557	ZIK1	-0.74122	-1.71666	-2.38195	0.0202987	-3.53385
cg02654291	C9orf64	0.302715	-0.879007	2.3166	0.0238397	-3.60732
cg02659920	EPS8L2	-0.602046	-1.86505	-2.74663	0.00786851	-3.0968
cg02674662	STX5	-0.0933535	-4.40569	-2.324	0.0234127	-3.59908
cg02675652	CSRNP2	0.354029	-0.592771	2.52738	0.0140517	-3.36492
cg02678688	TRMT61B	0.108771	-3.3347	2.05561	0.0440318	-3.88478
cg02680314	MMP25	-0.375371	-0.211419	-2.33393	0.0228509	-3.58799
cg02683873	TTC23L	0.548276	-2.85939	2.57334	0.0124743	-3.31001
cg02688393	COL4A2	0.586471	3.38416	2.018	0.0479173	-3.92257
cg02691002	SDHA	0.145352	4.14721	2.14951	0.0354986	-3.78798
cg02696742	HBP1	0.132604	-2.59627	2.17141	0.0337295	-3.7649
cg02697094	HRK	-0.376523	-0.0708267	-2.05173	0.0444194	-3.88871
cg02703535	PLEKHG4B	0.268818	1.83382	2.25587	0.027611	-3.67419
cg02707610	ZNF783	0.407966	2.02886	2.12089	0.0379322	-3.81785
cg02709100	HSPA12A	0.17458	0.827944	2.37412	0.0206968	-3.54274
cg02710296	C1orf14	-0.669346	0.655042	-2.37388	0.0207087	-3.543
cg02713801	HDAC4	0.140049	3.98022	3.09659	0.00293708	-2.63859
cg02717437	ZNF519	0.241499	-4.52634	2.19302	0.0320603	-3.74195
cg02718516	C8orf48	0.337005	-2.6453	2.30427	0.0245659	-3.62101
cg02726501	CACNG7	-0.212531	0.817731	-2.43788	0.0176498	-3.46976
cg02727591	LOC400696	0.357683	1.1069	2.01935	0.0477725	-3.92122
cg02731042	L3MBTL4	0.615833	-3.80641	2.03862	0.0457522	-3.90193
cg02744588	CCDC114	0.397995	0.341746	2.48191	0.0157873	-3.41852
cg02747254	KCTD13	0.482126	-1.58815	2.00655	0.0491581	-3.93397
cg02749148	KLF15	0.201191	-2.78855	2.69926	0.0089413	-3.15604
cg02752037	TICAM1	-0.302833	0.0571849	-2.59184	0.011886	-3.28771
cg02756939	C1orf97	0.38895	-2.22858	3.48583	0.000906315	-2.09145
cg02764188	WDR8	0.919633	2.44416	2.3228	0.0234816	-3.60042
cg02767164	ABI2	0.0995303	-3.92095	2.12172	0.0378594	-3.81699
cg02779761	ZNF264	0.392706	-3.39559	2.04605	0.0449921	-3.89444
cg02789309	DUSP7	-0.0822813	-3.64526	-2.16292	0.0344062	-3.77387
cg02790471	SCML4	0.551459	2.20416	2.58551	0.0120845	-3.29536
cg02793507	GPX6	0.535025	1.12215	2.13264	0.036916	-3.80563
cg02814523	GUCY2E	0.251741	-2.30904	2.85933	0.00577388	-2.9531
cg02815900	ORAI3	0.146397	-4.15436	3.36195	0.00132901	-2.26942
cg02820072	TDRD12	0.655248	2.8053	2.22771	0.0295325	-3.70474
cg02823866	CD274	-0.0757843	-3.60075	-2.10875	0.0390071	-3.83042
cg02837194	LRRC56	-0.132522	2.59256	-2.09169	0.0405627	-3.848
cg02844589	COX6B2	0.325493	0.655228	2.71812	0.00849905	-3.13253
cg02847897	KLHL8	0.336368	-0.999938	2.28443	0.0257765	-3.64292
cg02849750	BRAP	-0.152239	2.4389	-2.40695	0.0190737	-3.50534
cg02850715	ST14	0.411825	0.927679	2.84553	0.0059993	-2.9709
cg02856842	SH3BP5L	0.253962	-0.130442	2.2291	0.0294354	-3.70324
cg02858594	OLIG2	-0.45346	-1.38071	-2.51244	0.0146019	-3.3826
cg02870584	DKFZp761E198	0.743148	-2.90064	2.07534	0.0421038	-3.86473
cg02883161	MSI1	0.578722	-1.62125	3.03652	0.00349584	-2.71968
cg02883621	S100P	0.478858	1.24599	2.56776	0.0126568	-3.31671
cg02884524	ANKFY1	-0.119614	3.34777	-2.17323	0.0335864	-3.76298
cg02887114	VSTM1	0.461227	0.276434	2.42795	0.0180963	-3.48122
cg02891153	LOC100128822	0.304171	-1.4724	2.28169	0.0259476	-3.64593
cg02893429	C2orf58	-0.507116	1.17062	-2.16309	0.0343928	-3.77369
cg02901321	VSNL1	0.240204	-2.1153	2.12492	0.0375809	-3.81367
cg02909158	ZIC5	0.332442	1.23475	2.26629	0.0269288	-3.66282
cg02919814	DOPEY2	-0.196292	2.40261	-2.69317	0.00908849	-3.1636
cg02919936	PRDM14	-0.701025	-1.39991	-2.08941	0.0407745	-3.85033
cg02921257	XIRP1	-0.314129	1.75118	-2.02455	0.0472202	-3.91603
cg02922289	YKT6	-0.109162	2.83039	-2.38894	0.0199495	-3.52591
cg02936012	SHISA5	0.374153	0.338744	2.34484	0.0222473	-3.57577
cg02941697	ZNF713	0.40431	0.770113	2.24052	0.0286444	-3.69088
cg02942008	BMP7	-0.30089	-0.319058	-2.26727	0.0268657	-3.66175
cg02942965	HLA-E	0.0841778	-4.02177	2.2971	0.0249977	-3.62895
cg02945266	TOP3B	0.374331	0.174563	2.76447	0.00749611	-3.07431
cg02955504	TXNL4A	0.36762	1.10943	2.25729	0.0275172	-3.67265
cg02955989	ZNF536	0.519761	0.54333	2.09704	0.0400692	-3.8425
cg02957488	PHF20	0.0815655	3.41881	2.14714	0.0356946	-3.79046
cg02968094	GALNT8	0.449755	1.12391	2.42741	0.0181208	-3.48184
cg02968918	STOX2	0.249516	-0.357512	2.09422	0.040329	-3.8454
cg02979923	PCSK2	0.354626	-1.55228	2.35469	0.021714	-3.56468
cg02980604	RASL10B	0.279157	0.179736	2.4327	0.0178813	-3.47574
cg02989510	FLJ36000	0.260552	0.697825	2.24698	0.0282055	-3.68387
cg02991513	TTC7B	-0.152253	2.51209	-2.1779	0.0332207	-3.75803
cg02992067	FTO	0.376746	0.96797	2.01557	0.0481781	-3.925
cg02993944	OPCML	0.740359	1.93094	2.19199	0.0321383	-3.74305
cg02997119	STAM	-0.0764527	-3.26024	-2.26628	0.0269292	-3.66283
cg02997163	WDR8	-0.113815	3.29137	-2.01274	0.0484836	-3.92781
cg02997394	ANKRD27	-0.107783	3.00827	-2.13306	0.0368796	-3.80518
cg03012289	PKHD1L1	0.332841	1.7335	2.14284	0.0360526	-3.79496
cg03028236	IGDCC3	0.160408	-2.78846	2.68945	0.00917955	-3.16822
cg03028769	CDH23	-0.234521	1.78523	-2.06528	0.0430773	-3.87497
cg03033930	POLD1	-0.108949	4.71093	-2.20449	0.0312042	-3.72969
cg03041030	C1orf70	0.24721	3.65921	2.14213	0.0361126	-3.79571
cg03045133	HCG2P7	0.46233	2.69126	2.81248	0.00657281	-3.0133
cg03046946	HAUS7	0.233923	-1.031	2.35519	0.0216874	-3.56412
cg03052970	CACNG4	0.353956	-3.8534	2.25896	0.0274075	-3.67083
cg03056526	EVX1	-0.335454	0.00565998	-2.94623	0.00452455	-2.83973
cg03063057	GNA11	-0.257612	3.14591	-3.10855	0.00283626	-2.62232
cg03071793	LITAF	-0.325697	0.611563	-2.15656	0.0349208	-3.78057
cg03076130	GAMT	0.244746	0.654251	2.0654	0.0430656	-3.87485
cg03080639	PLA2G4E	0.407123	1.41773	2.31089	0.0241734	-3.61367
cg03087622	ITGAD	-0.181026	1.60496	-2.15224	0.0352733	-3.7851
cg03088475	ZNF251	0.168536	-3.86609	2.26758	0.0268453	-3.66141
cg03094377	SGMS1	0.250141	1.90324	2.34417	0.0222835	-3.57651
cg03098721	TTLL7	0.365817	0.107847	2.68743	0.00922932	-3.17072
cg03099431	SHISA2	0.210328	-2.24262	2.18801	0.0324409	-3.74729
cg03100449	NTN4	0.451063	-2.88353	2.43956	0.0175751	-3.46781
cg03102034	LUC7L2	-0.0940069	3.35358	-2.13526	0.0366925	-3.80289
cg03107888	HOXA13	-0.310643	0.0919175	-2.31957	0.0236675	-3.60402
cg03116364	TNFRSF21	-0.366718	2.24312	-2.06144	0.0434543	-3.87887
cg03118200	GRAP	-0.334872	2.01748	-2.0821	0.0414604	-3.85782
cg03124880	WSCD2	0.628347	1.2175	2.06441	0.043163	-3.87586
cg03126177	MAST1	0.377418	1.79328	2.76056	0.0075762	-3.07924
cg03129134	JARID2	-0.126347	3.03299	-2.08295	0.0413802	-3.85695
cg03145312	CMTM6	-0.0830355	-3.27691	-2.00953	0.0488317	-3.931
cg03153360	IL11	0.204056	-0.161091	2.00564	0.0492575	-3.93487
cg03160057	WDR66	0.24571	1.25938	2.38823	0.0199846	-3.52671
cg03163443	KLHDC8B	0.177381	-4.85163	2.05823	0.0437715	-3.88213
cg03166428	BGN	0.224471	-0.0221512	2.14579	0.0358067	-3.79187
cg03172801	MYL12A	-0.0826129	-3.0622	-2.20079	0.0314787	-3.73366
cg03174963	VPS4A	0.110276	-2.52001	2.01704	0.0480205	-3.92353
cg03178781	STYXL1	-0.184669	1.0418	-2.06097	0.0435005	-3.87935
cg03179419	RASA3	-0.516412	1.98937	-2.54978	0.0132617	-3.33824
cg03183094	CLIC2	0.292375	1.42424	2.14052	0.0362476	-3.79739
cg03187411	IMMP2L	0.514961	0.205762	3.13374	0.0026345	-2.58796
cg03202064	ZFHX3	0.180013	-4.53466	2.38552	0.0201193	-3.52979
cg03207391	GDF15	0.431413	1.09341	2.43167	0.0179276	-3.47692
cg03208983	MAGOHB	0.533827	0.818806	2.31986	0.0236508	-3.6037
cg03210340	FLJ10357	0.348945	-2.4331	2.13701	0.0365438	-3.80106
cg03211173	C20orf20	0.139259	-2.61349	2.07298	0.0423311	-3.86714
cg03217915	SIK1	0.714971	4.37089	2.09775	0.040004	-3.84177
cg03220455	ST6GALNAC2	-0.475469	0.587932	-2.44011	0.0175507	-3.46717
cg03224209	ESRRG	0.294708	-2.23088	2.17222	0.0336659	-3.76404
cg03227104	CBFA2T3	0.366575	1.66082	2.09374	0.040373	-3.84589
cg03228222	KLHL26	0.137144	-4.0155	2.38749	0.0200214	-3.52755
cg03229431	ASB15	0.133607	3.23812	2.12467	0.037602	-3.81392
cg03234970	RHOT2	0.0941878	-4.79982	2.08295	0.0413809	-3.85696
cg03236180	SGMS1	-0.170588	-3.55904	-3.19313	0.00221065	-2.50628
cg03237606	TMEM26	0.454529	-2.0328	2.08289	0.0413861	-3.85702
cg03239552	HOXC13	-0.598989	-0.428635	-2.05168	0.0444249	-3.88876
cg03243946	LDHB	0.497868	-2.61264	2.20015	0.031526	-3.73434
cg03257293	ITPKB	-0.312548	1.33799	-2.02384	0.0472956	-3.91675
cg03261347	C6orf97	0.330001	1.59349	2.04579	0.0450192	-3.89471
cg03265267	STAT4	0.364825	-3.62264	2.00258	0.0495942	-3.93791
cg03267151	LOC595101	0.248098	0.946696	2.46341	0.0165469	-3.44012
cg03273715	CACNG7	0.249531	0.189926	2.20976	0.0308178	-3.72405
cg03276956	PPP1R11	-0.0890146	-3.68571	-2.14359	0.0359903	-3.79418
cg03277515	PGLYRP4	0.31763	-0.249948	2.12189	0.0378443	-3.81681
cg03278114	AGXT2L2	-0.17987	2.14642	-2.13802	0.0364585	-3.80001
cg03287111	GLI2	-0.516228	-0.98496	-2.20435	0.0312146	-3.72985
cg03292284	OPN3	0.283638	0.106685	2.50147	0.0150182	-3.39554
cg03293882	ZNF614	-0.151875	-3.10259	-2.05947	0.0436482	-3.88087
cg03305840	TSNARE1	-0.127474	2.29365	-2.46309	0.0165606	-3.4405
cg03308494	SLC26A10	-0.404335	0.459164	-2.36423	0.0212093	-3.55393
cg03313542	TMEM209	0.294964	-1.82455	2.03399	0.0462303	-3.90657
cg03314029	ZNF469	-0.501435	-0.123066	-2.11185	0.0387296	-3.82721
cg03326125	WSCD2	0.588071	2.0603	2.46748	0.0163774	-3.43539
cg03332314	C8orf33	0.135969	-3.61601	2.38169	0.0203116	-3.53414
cg03339537	NR4A2	-0.299435	2.08051	-2.30024	0.0248077	-3.62547
cg03340715	C20orf46	0.392712	-1.31841	2.16854	0.0339573	-3.76794
cg03342084	ALKBH3	0.890844	-4.51295	3.32059	0.00150752	-2.32806
cg03350932	PDZD4	0.343059	-0.242958	2.97681	0.0041482	-2.79932
cg03352173	SLC9A10	0.455681	-0.248784	2.66206	0.00987572	-3.20206
cg03354717	LONP2	0.366884	-0.193803	3.12549	0.00269902	-2.59923
cg03365985	SHISA3	0.44431	-2.87591	2.06087	0.04351	-3.87945
cg03368099	HOXA5	-0.303916	0.31467	-2.05404	0.0441885	-3.88638
cg03369308	XKR7	0.254043	-3.07584	3.07705	0.00310892	-2.66507
cg03372353	SEPX1	0.22268	-1.42105	2.66592	0.00977471	-3.1973
cg03373115	PGM1	0.186186	-2.97128	2.01763	0.0479573	-3.92295
cg03384915	SIN3B	-0.1635	2.6863	-2.02797	0.0468596	-3.91261
cg03390300	CDKAL1	-0.109386	2.93389	-2.21896	0.0301531	-3.71417
cg03393017	LRCH3	0.319427	-0.705638	2.1664	0.0341274	-3.7702
cg03401114	BMP8B	0.278277	0.938532	2.12421	0.0376424	-3.8144
cg03407945	TSGA14	-0.386877	1.82631	-2.31206	0.0241048	-3.61237
cg03410806	CPLX1	0.205113	-0.127189	2.43544	0.0177586	-3.47258
cg03420068	BOC	-0.245564	-1.13291	-2.21588	0.0303741	-3.71748
cg03426198	TUBGCP2	-0.148211	2.19084	-2.27861	0.026141	-3.64931
cg03437770	SNX29	-0.3485	1.1551	-2.48701	0.0155832	-3.41254
cg03438101	INPP5A	-0.293791	0.889035	-2.01869	0.0478436	-3.92189
cg03455225	UBE2E2	0.652395	2.8469	2.133	0.0368852	-3.80525
cg03460049	DENND3	0.128351	-2.90182	2.21038	0.0307729	-3.72339
cg03469793	LHX4	0.260215	-3.7238	2.35238	0.0218379	-3.56728
cg03470396	COL9A2	0.349639	-3.95285	2.28356	0.0258304	-3.64387
cg03471999	DLGAP2	0.388696	2.85901	2.22472	0.0297431	-3.70796
cg03485262	RIN3	0.507182	-4.21762	2.06953	0.0426638	-3.87065
cg03491270	AKIRIN2	0.353718	1.44759	2.20172	0.0314096	-3.73267
cg03499775	LASP1	0.0866593	-4.00707	2.13373	0.0368224	-3.80448
cg03501387	SNAI1	0.548676	1.54935	2.49645	0.0152125	-3.40146
cg03502353	TTC17	0.358889	0.161212	2.13108	0.0370491	-3.80725
cg03503471	SDAD1	0.561273	2.57679	2.33267	0.0229214	-3.5894
cg03506944	TRIM2	0.3067	-2.97468	2.36732	0.0210476	-3.55043
cg03512392	CCDC150	0.161568	-2.58624	2.19238	0.032109	-3.74264
cg03523189	INPP5B	0.255389	-1.99346	2.15885	0.0347347	-3.77816
cg03523945	TLR2	0.39467	-2.72799	3.27109	0.00175096	-2.39774
cg03530721	TRAF7	-0.193337	2.17905	-2.3317	0.0229759	-3.59048
cg03531810	LY6D	0.365649	-0.0855524	2.31167	0.024128	-3.61281
cg03531951	KCNJ6	0.246339	-0.389142	2.13641	0.036595	-3.80169
cg03537942	KLRG2	0.292083	-1.42586	2.08085	0.0415789	-3.8591
cg03538470	MRPL48	0.363063	-2.32069	2.36848	0.0209875	-3.54912
cg03539340	IFT52	0.365364	-0.658841	2.17287	0.0336148	-3.76336
cg03551607	ESD	0.232874	-4.13918	2.0027	0.0495808	-3.93779
cg03553358	SOCS1	0.182345	-2.31257	2.76266	0.00753299	-3.07659
cg03554194	PVRL3	0.373409	2.04971	2.19223	0.0321205	-3.7428
cg03562266	TCF7L1	0.27467	-3.75051	2.52245	0.0142312	-3.37076
cg03564320	RPRM	0.370271	-0.990817	2.85567	0.00583293	-2.95783
cg03564506	TRRAP	0.106667	-2.20043	2.36527	0.0211546	-3.55275
cg03564754	ENDOG	0.56648	1.98944	2.09412	0.0403382	-3.8455
cg03566001	PVT1	-0.194231	2.54163	-2.22659	0.0296114	-3.70595
cg03568039	BCAS1	0.392195	2.12206	2.14072	0.0362311	-3.79719
cg03570279	RSF1	0.16554	2.91525	2.09511	0.0402463	-3.84448
cg03570332	LENG8	0.0854494	-3.38053	2.01063	0.0487124	-3.92991
cg03571927	DPY19L2P4	0.626776	-2.96868	2.55495	0.013085	-3.33206
cg03584535	ZNF586	0.409319	-2.92124	2.95809	0.00437502	-2.82409
cg03592824	STYXL1	0.388836	0.290658	2.0923	0.0405066	-3.84737
cg03594801	TBC1D16	-0.475249	2.02126	-2.01052	0.048724	-3.93002
cg03602880	CEP72	0.202246	-1.87266	2.46568	0.0164523	-3.43749
cg03602938	SHFM1	0.1136	-2.78992	2.21012	0.0307915	-3.72366
cg03604417	NTNG2	0.141296	-2.28738	2.1388	0.0363926	-3.79919
cg03609148	AKAP12	0.239522	-2.6747	2.05368	0.0442237	-3.88673
cg03611241	TMEM132B	0.300789	-0.773054	2.27382	0.026445	-3.65457
cg03612190	ZC3H3	-0.191348	3.59598	-2.39611	0.0195964	-3.51773
cg03619586	CLIC1	-0.432901	-0.63219	-2.17549	0.0334088	-3.76058
cg03623835	CLDN1	-0.327185	0.306799	-2.01955	0.0477518	-3.92103
cg03626857	ZNF227	-0.0891425	-3.05006	-2.21522	0.0304216	-3.71819
cg03629151	SDR42E1	0.336682	-1.63352	2.00337	0.0495069	-3.93712
cg03634775	PHKG2	0.316849	-0.6918	2.66017	0.00992556	-3.20439
cg03640864	DECR2	-0.095319	3.48889	-2.08144	0.0415236	-3.8585
cg03641251	WFDC2	0.233017	-3.10728	2.95049	0.00447032	-2.83412
cg03650842	FAM123B	0.217252	-0.194549	2.17439	0.0334949	-3.76174
cg03657045	UQCRFS1	0.320174	-1.48859	3.01598	0.00370867	-2.74719
cg03658337	ACSBG2	0.267066	-0.460194	2.65627	0.0100288	-3.20918
cg03662014	RRN3P2	-0.500754	-0.138046	-2.07275	0.0423532	-3.86737
cg03665970	ANO8	0.427528	-0.547062	2.10492	0.0393513	-3.83437
cg03668763	ZNF143	0.512561	0.39017	2.34335	0.0223285	-3.57743
cg03670441	FGFR1OP2	-0.511445	1.04604	-2.54109	0.0135632	-3.34861
cg03683554	AGFG2	0.0983478	-3.19068	2.22328	0.0298455	-3.70952
cg03684893	DIP2C	-0.327921	2.62538	-3.09666	0.00293643	-2.63849
cg03697509	STARD10	-0.96412	4.03756	-2.62564	0.010876	-3.24668
cg03703111	NR2F1	-0.30473	1.36058	-2.23188	0.029241	-3.70024
cg03706056	SETD4	0.863003	-0.457576	2.22283	0.0298775	-3.71001
cg03708045	KIAA0146	-0.393693	0.876316	-2.33573	0.0227499	-3.58597
cg03711791	KCNG1	-0.393344	2.09188	-2.57655	0.0123705	-3.30615
cg03711964	GLT1D1	0.510958	2.6988	2.09993	0.0398052	-3.83953
cg03714110	NR2F1	-0.265861	-0.120386	-2.05091	0.0445018	-3.88954
cg03720838	MDN1	0.091509	-4.42317	1.99995	0.0498844	-3.9405
cg03721281	PTRF	-0.136447	4.24605	-2.03437	0.0461915	-3.9062
cg03726569	SAFB2	-0.245149	3.46736	-2.92257	0.00483718	-2.87081
cg03730946	DENND1C	0.476061	-0.20102	2.59891	0.0116681	-3.27917
cg03733026	ZNRF3	-0.18556	3.36661	-2.31373	0.0240069	-3.61051
cg03733229	COL18A1	0.42046	-3.08678	2.63993	0.0104731	-3.22923
cg03735049	TSR2	0.252186	-1.26688	2.14488	0.0358824	-3.79283
cg03751967	FCGBP	-0.366155	0.917603	-2.09499	0.0402579	-3.84461
cg03753670	DNAJC11	0.358969	0.315191	2.60132	0.0115947	-3.27625
cg03762258	TMEM132D	0.318662	2.44642	2.52433	0.0141626	-3.36853
cg03762431	NAGK	-0.101922	-5.09064	-2.34015	0.0225047	-3.58102
cg03773413	ZNF124	-0.284355	2.33306	-2.89639	0.00520646	-2.90502
cg03777804	PLLP	0.192023	-4.40666	2.39059	0.0198675	-3.52402
cg03784679	FER	-0.0777098	-3.62191	-2.09863	0.0399231	-3.84086
cg03790146	P2RY4	0.281746	1.20202	2.24046	0.0286488	-3.69095
cg03801871	LBH	-0.58888	-0.0434287	-2.69147	0.00913003	-3.16571
cg03804148	PITPNA	0.127308	-4.19884	2.53058	0.0139362	-3.36111
cg03808351	PHF19	0.214043	-1.5524	2.36042	0.0214097	-3.55823
cg03813168	ARHGAP20	0.328748	-3.60482	2.26436	0.0270543	-3.66493
cg03824617	C6orf103	0.178541	-3.33117	2.01278	0.0484798	-3.92778
cg03836831	LMF1	-0.396251	2.44892	-2.81593	0.00651055	-3.00888
cg03838168	RBM3	0.281858	0.312429	2.53361	0.0138276	-3.35751
cg03851159	VAX1	-0.528856	-0.92499	-2.36086	0.0213865	-3.55773
cg03868770	RNF215	0.327601	-0.678666	2.76096	0.00756809	-3.07874
cg03884018	HS3ST4	0.775438	1.52079	2.30734	0.0243834	-3.61761
cg03885399	TAL1	-0.415963	-0.226711	-2.15955	0.034678	-3.77742
cg03885646	SSR3	0.443368	-1.14333	2.23246	0.0292004	-3.69961
cg03886681	HDAC4	-0.245495	2.07925	-2.2781	0.0261737	-3.64988
cg03891318	NMNAT3	0.365284	0.264863	2.57276	0.0124931	-3.31071
cg03896432	LOC389493	-0.116279	3.02857	-2.02842	0.0468126	-3.91216
cg03902391	ZNF778	-0.104166	3.24968	-2.04818	0.0447766	-3.89229
cg03907847	PDX1	-0.299072	-0.495596	-2.34181	0.0224131	-3.57916
cg03910196	MLST8	0.221592	-0.0276964	2.14758	0.0356581	-3.79
cg03913456	NCAPH	0.234212	-2.08956	2.25179	0.0278826	-3.67864
cg03917894	UTRN	0.280334	2.7648	2.02421	0.047256	-3.91637
cg03928874	LY86	-0.310222	-0.652301	-2.02853	0.0468004	-3.91205
cg03931619	MAGEC1	0.403321	1.04061	2.51816	0.0143889	-3.37584
cg03932398	RAD21L1	-0.424092	-2.4348	-2.52034	0.0143084	-3.37325
cg03936031	KIAA0649	-0.27327	1.36769	-2.47346	0.0161305	-3.42841
cg03962173	SH2B2	0.077495	-2.8133	2.21235	0.0306295	-3.72127
cg03972398	HOXC13	0.251127	-2.00403	2.43946	0.0175798	-3.46793
cg03975755	ASGR1	-0.438484	-0.27632	-2.23952	0.028713	-3.69197
cg03986097	INPP5A	-0.269697	2.32029	-2.45955	0.0167097	-3.44462
cg03986400	CCDC124	0.197554	0.396646	2.00507	0.04932	-3.93544
cg03991120	TNRC4	-0.358139	-0.125765	-2.33317	0.0228933	-3.58884
cg04001333	FLVCR2	0.503581	-0.419857	2.78501	0.00708728	-3.04829
cg04010122	SOS1	0.164367	-3.54798	2.81686	0.00649398	-3.0077
cg04010582	RAB11FIP4	-0.153821	2.77423	-2.1985	0.0316489	-3.7361
cg04010666	TMEM216	0.37094	1.82362	2.14396	0.0359597	-3.7938
cg04012082	CACNA2D4	0.297413	-0.970662	2.12669	0.0374271	-3.81182
cg04013093	GNMT	0.32811	-3.06717	2.07613	0.0420286	-3.86393
cg04014686	LSAMP	0.299391	1.67622	2.03294	0.0463395	-3.90763
cg04016798	FILIP1	0.425269	2.20865	2.04843	0.0447515	-3.89204
cg04020066	JAZF1	0.253868	-4.15623	2.10392	0.0394419	-3.83541
cg04039414	NSMCE1	-0.09446	-4.06687	-2.01505	0.0482347	-3.92552
cg04046629	CD6	0.317862	0.195651	2.02751	0.0469083	-3.91308
cg04077210	KLHL2	-0.12191	-3.99082	-2.62149	0.0109956	-3.25173
cg04080291	FAM116A	0.16082	-0.217735	2.58682	0.0120433	-3.29378
cg04081899	ZNF346	0.164521	-4.3067	2.1512	0.0353591	-3.7862
cg04091454	DTWD2	0.243088	1.56145	2.06769	0.0428422	-3.87252
cg04092033	C21orf59	0.295743	-1.07815	2.22783	0.0295238	-3.7046
cg04093149	SLC6A9	0.292333	0.410113	2.03571	0.0460526	-3.90485
cg04097334	DIRC1	-0.412019	-0.505574	-2.06563	0.0430429	-3.87461
cg04100307	MYOM2	0.364118	1.19418	2.16975	0.0338613	-3.76666
cg04102905	OR2T34	0.447114	-0.455723	2.21811	0.0302138	-3.71508
cg04125341	CLSTN2	0.372365	0.782451	2.08071	0.0415927	-3.85925
cg04134048	TNFRSF10D	-0.539316	-0.942382	-2.06493	0.0431113	-3.87532
cg04145681	SFTA2	-1.66248	-0.336355	-2.52399	0.0141746	-3.36893
cg04156581	TCTE1	0.671079	1.44307	2.38669	0.0200611	-3.52846
cg04174777	TMEFF2	0.419291	0.314845	2.14644	0.0357531	-3.7912
cg04181214	DENND3	-0.272163	0.535885	-2.27163	0.0265846	-3.65697
cg04186415	WDR27	-0.398744	2.56879	-2.03292	0.0463422	-3.90765
cg04189705	TRPM6	0.138275	-2.28536	2.00744	0.0490606	-3.93309
cg04192879	NR2F1	-0.411886	0.384337	-2.55586	0.0130543	-3.33098
cg04194821	EGLN3	0.29385	-0.499828	2.41528	0.0186804	-3.49579
cg04206797	SRCIN1	0.449177	1.50028	2.12779	0.0373321	-3.81067
cg04218278	MUL1	-0.190086	3.16396	-2.69548	0.00903227	-3.16073
cg04219613	COBL	0.182959	-3.09228	2.12773	0.0373374	-3.81074
cg04220104	MIR548N	0.663947	-0.634189	3.82485	0.000306056	-1.58866
cg04226892	NAV1	-0.351756	2.53959	-2.05946	0.0436497	-3.88088
cg04228573	MAP2K6	0.264447	-3.42456	2.0329	0.046344	-3.90767
cg04228935	RUNX1	-0.478012	-0.322473	-2.23509	0.0290179	-3.69676
cg04245870	CRAMP1L	0.662886	2.33136	2.4912	0.0154177	-3.40762
cg04248234	DCBLD1	-0.25342	-0.38763	-2.05885	0.0437097	-3.8815
cg04255201	PNMAL2	-0.22789	-0.399512	-2.05665	0.0439282	-3.88373
cg04261102	RABGAP1L	0.279446	2.2043	2.25163	0.0278933	-3.67881
cg04261408	SDC2	0.365699	-1.584	2.31325	0.0240349	-3.61105
cg04266474	EEPD1	0.522015	0.321598	3.04797	0.00338219	-2.70429
cg04270339	CDRT1	-0.116953	3.23816	-2.03638	0.0459832	-3.90418
cg04282419	ARHGAP20	0.313351	-2.07917	2.18023	0.0330394	-3.75555
cg04284463	RPRM	0.449127	-2.22041	3.04817	0.00338025	-2.70403
cg04297867	USP3	0.138177	3.15035	2.17266	0.0336312	-3.76358
cg04299400	FMN2	0.540809	1.41311	2.0271	0.046951	-3.91348
cg04304450	BIK	-0.319737	0.132604	-2.28803	0.025553	-3.63896
cg04305539	ZNF695	0.389481	-0.0414568	2.08977	0.0407409	-3.84996
cg04307764	NTM	0.594584	1.29223	2.09615	0.0401509	-3.84341
cg04308167	SLC47A1	-0.365525	-0.0168461	-2.27147	0.0265954	-3.65715
cg04313758	VPS45	0.0931417	3.5809	2.2996	0.0248461	-3.62618
cg04316754	MMP24	0.211235	-1.87171	2.45442	0.016928	-3.45058
cg04326887	PPP4R2	0.31529	2.35955	2.38676	0.0200575	-3.52838
cg04329125	CRIP2	-0.400705	1.46126	-2.31779	0.0237705	-3.606
cg04334417	RCN1	0.264011	-4.50592	2.42687	0.0181453	-3.48246
cg04336178	LMO7	-0.0919307	2.79136	-2.17666	0.0333176	-3.75935
cg04336894	DOCK4	0.371292	2.72888	2.81981	0.00644138	-3.00392
cg04337611	DDX60L	-0.0860974	-3.79623	-2.15202	0.0352914	-3.78534
cg04342092	ZIK1	-0.830159	-2.90473	-2.01037	0.048741	-3.93017
cg04348683	C16orf52	-0.122474	2.90348	-2.44772	0.017217	-3.45836
cg04350645	SHISA2	-0.425741	1.56789	-2.12854	0.0372679	-3.8099
cg04351776	PDIA6	0.27196	-2.10646	2.2204	0.0300505	-3.71262
cg04358214	C16orf70	0.583369	-1.78936	2.24932	0.0280479	-3.68133
cg04358923	PRKRIR	0.293556	-2.49737	2.28889	0.0254996	-3.638
cg04366381	FAM49B	0.0994836	-4.5213	2.13904	0.0363728	-3.79895
cg04372321	DGKQ	-0.105384	-4.61617	-2.31665	0.0238365	-3.60727
cg04372436	ATCAY	-0.420211	2.11019	-2.47585	0.0160327	-3.42561
cg04378874	VAT1L	-0.370616	-2.70053	-2.05392	0.0442005	-3.8865
cg04381681	MDC1	-0.129021	2.56413	-2.00211	0.049646	-3.93837
cg04383369	VPS4A	0.13396	-4.48294	2.45666	0.0168325	-3.44798
cg04386839	OR6P1	0.419616	0.641402	2.27384	0.0264438	-3.65455
cg04395930	C19orf50	0.341237	2.12719	2.48572	0.0156349	-3.41406
cg04398282	STAP1	-0.396769	1.92687	-2.24481	0.0283526	-3.68623
cg04400047	UBIAD1	0.250052	-2.09242	2.33237	0.0229383	-3.58974
cg04400147	NISCH	-0.112618	4.59293	-2.11935	0.0380664	-3.81944
cg04406800	C6orf72	-0.105736	3.26801	-2.57168	0.0125285	-3.31201
cg04411041	FAM180B	-0.176444	0.834875	-2.52274	0.0142205	-3.37042
cg04413261	EIF2A	0.122825	3.16381	2.39519	0.0196416	-3.51878
cg04414459	LOC387646	0.619544	1.79953	2.05628	0.0439644	-3.8841
cg04426779	C2orf90	0.600971	1.46694	2.03491	0.0461353	-3.90565
cg04436971	INO80E	0.295189	0.637202	2.04523	0.0450762	-3.89527
cg04437590	NDUFA5	-0.0750409	-2.75663	-2.00668	0.049143	-3.93383
cg04439622	CRIP2	-0.350118	0.961882	-2.11376	0.0385603	-3.82524
cg04440597	EXTL3	0.107084	4.24644	2.62104	0.0110087	-3.25229
cg04442406	PLSCR2	0.578503	-1.81509	3.04864	0.00337569	-2.7034
cg04455646	IRAK2	0.397885	-1.32966	2.50428	0.0149106	-3.39223
cg04459086	LARS2	0.298426	-1.12949	2.27364	0.0264566	-3.65477
cg04461013	TNRC18	0.284753	1.44013	2.21198	0.0306564	-3.72167
cg04461028	HDAC4	-0.171787	3.34522	-2.27598	0.0263075	-3.6522
cg04463607	FAM55B	0.375604	0.353911	2.0342	0.0462086	-3.90636
cg04464219	MTDH	-0.0673087	-2.60521	-2.17904	0.0331318	-3.75682
cg04471919	DNAH11	0.355626	0.161329	2.11489	0.0384595	-3.82407
cg04478179	RNF175	0.689745	-3.37718	2.25871	0.027424	-3.6711
cg04482794	ITPKB	0.555675	-1.90319	2.26672	0.0269013	-3.66235
cg04486022	FLJ30058	0.223888	0.383188	2.09858	0.039928	-3.84091
cg04494197	AP2A2	-0.327539	2.90325	-2.6709	0.00964582	-3.19116
cg04496895	SVIL	0.489509	1.51499	2.04551	0.0450471	-3.89499
cg04500084	PTCHD3	0.436134	1.02968	2.05086	0.044507	-3.88959
cg04500185	LOC100128023	1.22238	2.69675	2.4468	0.0172574	-3.45943
cg04503319	ANKRD11	0.200657	0.27671	2.01458	0.0482847	-3.92598
cg04504312	GDE1	0.147682	-2.88487	2.39434	0.019683	-3.51975
cg04508340	CLYBL	0.396681	2.71754	2.35227	0.0218444	-3.56742
cg04518155	C4orf27	0.162794	-3.10256	2.43392	0.0178265	-3.47433
cg04523069	HIATL1	0.250446	-2.11988	2.80587	0.00669329	-3.02174
cg04526616	FOXK1	0.617283	3.12985	2.3688	0.0209709	-3.54876
cg04529538	FUT5	0.419316	1.67599	2.08645	0.0410517	-3.85337
cg04539203	H2AFY2	0.303775	-2.26594	2.20991	0.0308067	-3.72389
cg04539283	WDR59	0.289489	-1.02563	2.55159	0.0131996	-3.33608
cg04542290	LOC340094	0.534247	1.49969	2.01878	0.0478334	-3.92179
cg04542977	EPS15	-0.409832	-0.954027	-2.26191	0.027214	-3.66761
cg04545556	NPTX2	0.432496	0.767064	2.19812	0.0316777	-3.73651
cg04546573	GULP1	0.425251	0.475586	2.06345	0.043257	-3.87684
cg04546691	ROBO2	0.306347	2.37451	2.09158	0.0405729	-3.84811
cg04553793	DNAJC27	0.559382	0.560615	3.06897	0.00318269	-2.67599
cg04554928	TRIM15	-0.305662	-0.429139	-2.17736	0.0332624	-3.7586
cg04556868	GADL1	0.284631	-2.32367	2.0005	0.0498238	-3.93996
cg04557677	JAK3	-0.332443	-0.331432	-2.04759	0.0448368	-3.89289
cg04562662	LOC554203	0.367753	2.07948	2.5169	0.0144358	-3.37733
cg04564312	GIN1	-0.108265	-4.70453	-2.1462	0.0357723	-3.79144
cg04570265	RNF187	-0.181683	2.23018	-2.34513	0.0222314	-3.57544
cg04571965	C14orf162	-0.218408	-2.33788	-2.21762	0.030249	-3.71561
cg04574135	NFXL1	0.271734	-2.01525	2.21457	0.0304685	-3.71888
cg04575058	TSGA14	0.65474	-2.08709	3.23068	0.00197665	-2.45418
cg04578090	PROCA1	-0.469426	0.578696	-2.51801	0.0143945	-3.37601
cg04578774	ALX4	-0.560436	-0.824702	-2.08725	0.0409765	-3.85255
cg04585378	CASR	0.648604	-0.669413	3.07295	0.00314616	-2.67061
cg04590638	KCNG4	0.349771	1.02936	2.07112	0.0425099	-3.86903
cg04595479	LOC100188947	0.330498	1.03057	2.14449	0.035915	-3.79324
cg04603355	ZNF599	0.379927	0.756108	2.21051	0.0307632	-3.72325
cg04605681	SH3TC1	-0.231942	0.330121	-2.3328	0.0229139	-3.58925
cg04606053	MMP24	0.251969	-0.367436	2.84433	0.00601928	-2.97244
cg04608829	CYP4F12	0.373116	-0.275693	2.53281	0.0138561	-3.35846
cg04610028	RAB11B	-1.44217	1.29998	-3.1335	0.00263636	-2.58829
cg04647948	INO80D	0.166403	-3.40086	2.31507	0.0239287	-3.60903
cg04659473	IFIT1	-0.255334	-2.37269	-2.16475	0.0342594	-3.77194
cg04661709	DAB2IP	0.314934	0.210316	2.62997	0.0107526	-3.2414
cg04668137	MIPEP	-0.231539	1.50695	-2.09775	0.0400045	-3.84177
cg04668164	SMAP2	0.0820336	-3.1882	2.14217	0.0361094	-3.79567
cg04678715	FANK1	0.156124	1.36917	2.09316	0.0404264	-3.84648
cg04687409	HS3ST2	0.48357	0.554553	2.01289	0.0484678	-3.92767
cg04689048	PNMAL2	-0.27703	-0.32069	-2.34073	0.0224728	-3.58037
cg04691233	JAM3	0.553907	0.977607	2.4817	0.0157957	-3.41876
cg04693873	PM20D2	0.264299	-2.36631	2.05768	0.0438256	-3.88268
cg04701505	POU4F3	-0.475412	-0.62528	-2.85818	0.00579228	-2.95458
cg04702527	CCRN4L	0.336682	0.746024	2.61082	0.0113089	-3.26472
cg04706597	GNMT	0.367486	-1.86927	2.23596	0.0289576	-3.69582
cg04709321	RASGRF2	0.322944	2.00362	2.15509	0.0350407	-3.78212
cg04711526	NDUFB1	-0.180395	1.14765	-2.22693	0.0295876	-3.70558
cg04719215	GPR139	0.381373	-0.353521	2.09651	0.0401178	-3.84304
cg04722155	GAK	0.157369	3.4267	2.53057	0.0139364	-3.36112
cg04733933	SORCS2	-0.259062	1.33721	-2.04016	0.0455931	-3.90037
cg04747382	SMPD3	-0.126447	3.3075	-2.3448	0.0222493	-3.57581
cg04752210	JPH3	0.392425	0.826698	2.47257	0.0161669	-3.42945
cg04752257	TOMM20L	0.370758	-0.550732	2.46798	0.0163565	-3.4348
cg04752818	INTS1	0.973708	2.20699	2.67941	0.00942929	-3.18065
cg04761751	DKFZp761E198	0.774619	-2.76862	2.02011	0.0476922	-3.92047
cg04764898	C19orf45	0.325821	0.696402	2.13547	0.0366749	-3.80267
cg04766076	APOC4	-0.11477	3.26305	-2.28492	0.0257458	-3.64238
cg04768425	HTRA1	0.333677	-0.688298	2.28947	0.0254642	-3.63737
cg04770195	CHD9	0.44541	0.987837	2.14418	0.0359413	-3.79357
cg04788221	C20orf20	0.114842	-3.72064	2.36091	0.0213835	-3.55767
cg04788957	SH3PXD2A	-0.392963	-1.2689	-2.09823	0.0399599	-3.84127
cg04790148	CXorf22	0.314902	-0.801813	2.07082	0.0425391	-3.86934
cg04794662	FOXP1	-0.481799	-0.566725	-2.08717	0.0409843	-3.85264
cg04801779	GDPD4	0.68765	0.309326	2.52273	0.0142209	-3.37043
cg04806237	DIP2C	-0.132355	3.42343	-2.08571	0.0411206	-3.85413
cg04810656	ESYT3	-0.299006	2.37332	-2.47501	0.0160669	-3.42659
cg04819351	C15orf41	0.468419	0.0869531	2.25041	0.0279752	-3.68015
cg04823921	TH1L	0.141938	-2.1415	2.6497	0.0102054	-3.21725
cg04842157	ADAMTS19	0.287189	-1.70607	2.61286	0.0112484	-3.26224
cg04848972	DDB2	0.318143	-1.36626	2.17233	0.0336572	-3.76393
cg04858335	C16orf68	-0.237978	2.95177	-3.05086	0.00335408	-2.70041
cg04861096	STUB1	-0.268406	-0.582427	-2.34306	0.0223443	-3.57776
cg04863573	RIMS3	0.128738	-4.16778	3.13649	0.00261327	-2.58419
cg04869379	MYO16	0.560234	0.0013544	2.38385	0.0202032	-3.53169
cg04870460	PRKAB2	0.373853	-2.40481	2.02252	0.0474349	-3.91806
cg04872848	FLVCR2	0.351926	-0.00171207	2.81769	0.00647917	-3.00664
cg04876500	MGMT	-0.334164	2.23526	-2.46029	0.0166786	-3.44377
cg04881095	KLHL29	-0.400043	1.77351	-2.38207	0.0202924	-3.53371
cg04887076	NLRP2	0.833539	0.408252	3.89634	0.000241807	-1.48002
cg04902729	CACNA1E	-0.625652	-0.671643	-2.15664	0.0349141	-3.78049
cg04903360	PARD3	0.259251	-2.69736	2.09764	0.0400145	-3.84188
cg04905173	GTF2E2	0.14202	0.672018	2.40577	0.01913	-3.50669
cg04908625	ADCY5	0.370502	-0.822505	2.28265	0.0258873	-3.64487
cg04911739	MLLT6	-0.259544	2.44134	-2.43699	0.0176892	-3.47078
cg04917686	ZBTB20	0.203214	-3.39967	2.23811	0.0288097	-3.69349
cg04923739	ARHGAP22	-0.383739	3.27543	-2.46326	0.0165534	-3.4403
cg04932878	NEGR1	0.142647	-0.284516	2.32689	0.0232479	-3.59586
cg04946274	CYP27C1	-0.428458	2.02475	-2.31598	0.0238758	-3.60801
cg04956254	DUSP14	-0.349746	1.73341	-2.55894	0.0129504	-3.32729
cg04959815	CYB5R2	0.516133	-2.54053	2.69756	0.00898206	-3.15814
cg04963424	SLC26A10	-0.431809	-0.05337	-2.24147	0.0285797	-3.68986
cg04963967	KLRG2	0.248369	-0.280765	2.28544	0.0257135	-3.64181
cg04971036	TIMP2	-0.378409	2.55132	-2.22605	0.0296497	-3.70653
cg04980832	CORIN	0.424919	-3.23008	2.2113	0.0307058	-3.7224
cg04986870	KCNN1	-0.175411	-4.49442	-2.38632	0.0200797	-3.52888
cg04986934	KRT12	-0.144627	3.18095	-2.00386	0.0494531	-3.93664
cg04987122	TRAF7	0.750181	0.768373	3.11425	0.00278938	-2.61456
cg04998634	KLF16	-0.627474	-0.380571	-2.52609	0.0140985	-3.36645
cg05000748	RUNX1	-0.305465	-0.743623	-2.06153	0.0434452	-3.87878
cg05018835	RPS6KA5	0.398717	0.547938	2.16036	0.034612	-3.77656
cg05024762	ARL3	-0.251036	2.17534	-2.2799	0.0260599	-3.6479
cg05029838	SUMO3	0.0796513	-3.55211	2.12427	0.0376369	-3.81434
cg05033185	RNF217	-0.298358	0.97361	-2.8877	0.00533461	-2.91632
cg05040675	PLP2	0.335988	0.948046	2.36293	0.0212772	-3.55539
cg05042743	TMEM216	0.50659	-3.35191	2.29161	0.0253325	-3.63501
cg05044743	SP6	-0.416726	-1.04576	-2.07196	0.0424289	-3.86817
cg05045781	FHL3	0.161386	-2.51579	2.07714	0.0419321	-3.86289
cg05046717	OSBPL11	-0.112266	3.07327	-2.0665	0.0429586	-3.87374
cg05054831	PIGU	0.291557	-1.35308	3.49401	0.000883457	-2.07959
cg05065037	ZCCHC6	0.221313	-2.85711	2.02279	0.0474064	-3.91779
cg05068730	RPS6KA2	0.50342	2.93691	2.2616	0.0272344	-3.66795
cg05068943	GOT1	-0.0972199	3.08115	-2.11211	0.0387072	-3.82695
cg05072547	GPRC5B	-0.348872	1.19421	-2.03607	0.0460148	-3.90449
cg05078775	TMEM47	0.255886	-0.0771559	2.22753	0.0295451	-3.70493
cg05080154	SALL3	-0.395129	-2.04771	-2.03404	0.0462255	-3.90653
cg05084793	SMEK1	0.22281	-1.02164	2.4488	0.0171702	-3.45711
cg05099240	TUBA3C	0.666123	1.46061	2.09384	0.040364	-3.84579
cg05105330	KIAA0513	0.556292	0.799141	2.0299	0.0466575	-3.91068
cg05116906	KL	0.435555	-3.64579	2.0401	0.0456001	-3.90044
cg05130518	IL17D	0.315779	0.447811	2.42134	0.018399	-3.48883
cg05138681	NCRNA00092	0.379106	1.52214	2.43579	0.017743	-3.47217
cg05149093	PRM2	-0.281355	2.17252	-2.27931	0.0260974	-3.64855
cg05153791	ASPM	0.25811	0.407338	2.41639	0.0186284	-3.49451
cg05157625	RIN3	0.346735	-0.367603	2.02437	0.047239	-3.91621
cg05169988	IGF1R	-0.226949	0.289227	-2.05009	0.0445846	-3.89037
cg05173987	C15orf38	0.339235	1.06517	2.55314	0.0131468	-3.33423
cg05180717	TMEM85	0.397032	-0.331159	2.44941	0.017144	-3.45641
cg05180887	MYT1L	-0.353872	0.900836	-2.11792	0.0381926	-3.82093
cg05181221	SOCS1	0.130315	-4.43329	2.42051	0.0184372	-3.48978
cg05185038	CRIP2	-0.41565	2.48722	-2.06212	0.043387	-3.87818
cg05195772	EFNA2	0.543581	1.56853	2.31764	0.0237794	-3.60617
cg05201300	ATP6V0E1	0.467439	-0.874537	2.53709	0.0137039	-3.35337
cg05203809	SNX29	0.682238	0.689345	3.73226	0.000413879	-1.72809
cg05207465	GEMIN5	0.213431	-0.383087	2.18442	0.0327163	-3.75111
cg05211662	ADAMTS19	0.369015	-1.24723	2.53832	0.0136605	-3.3519
cg05211836	F2RL3	-0.561931	-0.770252	-2.24628	0.0282529	-3.68463
cg05212802	RNF150	0.284928	-2.45688	2.13864	0.036406	-3.79936
cg05216862	FAM46A	0.278916	-4.65922	2.10962	0.0389289	-3.82952
cg05223459	C11orf94	0.42785	0.203383	3.09067	0.00298814	-2.64662
cg05225065	STK32C	0.153067	1.96851	2.04202	0.0454034	-3.89851
cg05227350	ZBTB44	0.374266	-0.38911	2.00585	0.0492347	-3.93467
cg05227616	PSORS1C1	-0.193482	-2.8342	-2.14564	0.0358192	-3.79203
cg05236037	ZNF202	-0.0778791	-3.35389	-2.04905	0.0446886	-3.89141
cg05236446	RBM25	0.146612	-2.48078	2.0037	0.0494708	-3.9368
cg05239308	TTLL13	0.127991	-2.559	2.00761	0.0490416	-3.93291
cg05240267	LOC342346	0.422457	1.80854	2.06119	0.0434786	-3.87912
cg05241134	MYOM2	0.349624	-0.480985	2.33205	0.0229563	-3.5901
cg05242653	STX11	0.315348	-0.0126083	2.09747	0.0400294	-3.84205
cg05257898	NKAP	0.305672	1.36104	2.57968	0.0122697	-3.30238
cg05262631	SETD2	-0.104456	3.3836	-2.19033	0.0322646	-3.74482
cg05265020	NRN1	-0.276906	0.222006	-2.89029	0.0052962	-2.91296
cg05267524	METAP1	-0.0786888	-3.20392	-2.01586	0.0481469	-3.92471
cg05280336	TCP10	-0.305528	0.0769257	-2.6591	0.00995371	-3.2057
cg05295494	BAI3	0.477846	-3.51718	2.14273	0.0360625	-3.79508
cg05299774	SNTG2	0.476869	1.85368	1.99982	0.0498988	-3.94063
cg05301188	KLF11	0.816827	-3.50404	3.92649	0.000218793	-1.43397
cg05302211	CCDC101	0.332902	0.256027	2.50508	0.01488	-3.39129
cg05304405	FSTL3	0.308531	-0.0634264	2.04124	0.0454826	-3.89929
cg05328461	EIF3G	0.438188	0.549907	2.52979	0.0139647	-3.36205
cg05333753	MTA1	0.151594	2.96276	2.14632	0.0357627	-3.79132
cg05336561	EDEM3	-0.0877003	-3.15301	-2.2122	0.0306406	-3.72144
cg05337441	APOB	0.284807	-1.78361	2.20234	0.0313636	-3.732
cg05343105	KIF22	0.330665	-0.470826	2.32776	0.0231985	-3.59489
cg05361728	B3GNTL1	0.374841	1.11677	2.53277	0.0138578	-3.35851
cg05363616	TBX15	-0.483368	-0.120478	-2.35865	0.0215032	-3.56022
cg05375999	GSK3A	-0.12666	3.19402	-2.11038	0.0388608	-3.82873
cg05379634	KLF16	-0.443001	0.469414	-2.20486	0.0311769	-3.7293
cg05385567	KCTD13	0.197431	-2.46019	3.3992	0.00118548	-2.21626
cg05385610	FCGBP	-0.231496	0.126795	-2.0982	0.0399625	-3.8413
cg05387146	ME1	0.649954	-3.16482	2.39715	0.0195459	-3.51655
cg05388492	ESRRG	0.327642	-2.95144	2.08734	0.0409685	-3.85246
cg05391002	TRIM6	0.398286	1.95473	2.63128	0.0107154	-3.2398
cg05398321	GPR68	0.449908	2.48576	2.65044	0.0101852	-3.21634
cg05399707	TRIP10	-0.0813158	-3.1831	-2.28678	0.0256301	-3.64033
cg05401447	TRIM56	0.0738908	-4.44439	2.03455	0.0461721	-3.90601
cg05403431	DOCK3	0.244625	3.39862	2.23377	0.0291097	-3.6982
cg05412906	HSP90AA1	0.248217	-0.53695	2.32625	0.0232843	-3.59657
cg05417729	TSSC1	0.114386	4.66633	2.27385	0.0264434	-3.65454
cg05428268	TAF6L	0.245988	-2.52281	2.39126	0.0198346	-3.52326
cg05428781	CNOT8	-0.0713062	-3.21184	-2.08299	0.0413771	-3.85692
cg05435286	NEK10	-0.387773	-3.03082	-2.11478	0.0384698	-3.82419
cg05450667	C22orf27	0.451861	-1.59977	2.00113	0.0497545	-3.93934
cg05450979	NUBP1	-0.866696	2.18594	-2.07721	0.0419255	-3.86282
cg05451359	MIR548H4	0.333576	-0.980952	2.70248	0.0088642	-3.15203
cg05458609	FAM83F	-0.23825	1.65512	-2.0474	0.0448553	-3.89308
cg05463656	PRKCZ	-0.112048	3.20153	-2.11532	0.038422	-3.82363
cg05465916	LOC284023	0.367353	-0.365558	2.32485	0.0233644	-3.59814
cg05478172	FAM113B	0.472139	1.5301	2.00271	0.0495794	-3.93777
cg05483252	RAB5A	0.174059	-2.9358	2.12788	0.0373244	-3.81058
cg05484548	RRN3P2	-0.489884	-0.935236	-2.27556	0.0263344	-3.65267
cg05505912	C1orf107	-0.0769877	-3.33551	-2.19441	0.0319556	-3.74047
cg05506979	AFF4	0.294678	2.33609	2.01657	0.0480708	-3.924
cg05514401	IRS2	0.411349	2.01964	2.42631	0.0181708	-3.4831
cg05521767	GDPD5	-0.298406	1.66296	-2.18848	0.0324049	-3.74678
cg05523882	AARS	0.337364	-0.9625	2.33841	0.022601	-3.58297
cg05525106	C6orf150	0.307148	-3.33088	2.12902	0.0372265	-3.8094
cg05525648	ADAM12	-0.266392	1.6665	-2.40361	0.0192334	-3.50916
cg05527491	B3GNT9	0.54123	-3.36127	2.02093	0.0476046	-3.91965
cg05550420	DCHS1	-0.586679	0.120236	-2.52141	0.0142692	-3.37199
cg05553342	DECR2	-0.163972	1.83037	-2.26118	0.0272619	-3.66841
cg05558767	PTDSS2	-0.134566	1.49858	-2.10978	0.0389147	-3.82936
cg05569161	NUAK1	0.370376	-1.87977	3.01	0.00377278	-2.75517
cg05577945	SLAIN1	0.174886	-2.19991	2.29228	0.0252911	-3.63426
cg05578357	LDHB	0.52891	-3.31394	2.5268	0.0140725	-3.36559
cg05578570	ZFPM1	-0.329651	-2.21846	-2.20341	0.0312846	-3.73086
cg05592278	LRRC37A3	0.284186	0.454563	2.02998	0.0466486	-3.9106
cg05597001	C6orf103	0.248148	-2.37595	2.23349	0.029129	-3.6985
cg05608730	C1QTNF2	0.352539	-1.73861	2.47872	0.015916	-3.42225
cg05617732	TNFRSF21	-0.386828	2.44259	-2.18277	0.0328429	-3.75286
cg05619858	NOSTRIN	-0.147779	-0.220115	-2.80465	0.00671589	-3.0233
cg05623727	RBM5	0.394679	1.23137	2.15843	0.0347682	-3.7786
cg05626117	CLEC4G	0.354052	1.08171	2.14241	0.0360886	-3.79541
cg05636912	FAM159B	0.162649	3.01057	2.32973	0.0230867	-3.59268
cg05639205	SHH	-0.32938	-0.664388	-2.33543	0.0227668	-3.58631
cg05642143	GNMT	0.228933	-2.18831	2.15266	0.0352393	-3.78467
cg05647048	MRPS16	-0.0730757	-3.17903	-2.03867	0.0457463	-3.90187
cg05651960	KLF14	-0.478951	-2.89726	-2.23259	0.0291913	-3.69947
cg05654096	NUAK1	-0.249786	0.789567	-2.00857	0.0489368	-3.93196
cg05657090	RNASEH2A	0.348261	1.18872	2.52713	0.0140606	-3.36521
cg05662500	GPD1L	0.134446	-2.41654	2.01125	0.0486449	-3.92929
cg05666458	CEND1	0.216129	0.638487	2.07511	0.0421257	-3.86496
cg05673287	SGK269	0.346948	0.676058	2.37843	0.0204768	-3.53785
cg05676046	SPATS2	0.297971	3.00375	2.11762	0.0382185	-3.82124
cg05683451	CCDC153	0.356301	2.15881	2.05146	0.0444469	-3.88898
cg05686118	GPR114	0.291484	-0.0420883	2.20375	0.0312592	-3.73049
cg05695384	CSMD2	0.661542	1.61498	2.04356	0.0452453	-3.89695
cg05697587	PSMB4	0.115738	-3.39032	2.36041	0.0214101	-3.55824
cg05701415	JARID2	-0.128652	3.21164	-2.33073	0.0230307	-3.59157
cg05704942	MRTO4	-1.18257	-0.663053	-2.10642	0.0392163	-3.83283
cg05706517	ARSK	-0.139387	2.43307	-2.08188	0.0414815	-3.85805
cg05709196	PUM2	0.0937725	3.34753	2.01469	0.0482729	-3.92587
cg05709402	PARD3	-0.273305	2.67939	-2.60765	0.0114036	-3.26857
cg05712610	GALNT11	0.227861	-3.97566	2.46638	0.0164231	-3.43667
cg05713693	PRDM5	0.281956	-2.51159	2.21619	0.030352	-3.71715
cg05722906	CYP4F12	0.277432	-1.63135	2.19189	0.0321463	-3.74316
cg05730099	TPRKB	0.285621	-2.54685	2.3238	0.023424	-3.5993
cg05736642	HTT	-0.100857	3.43892	-2.09517	0.0402411	-3.84442
cg05749792	DGAT2L6	0.361199	0.817684	2.04442	0.0451576	-3.89608
cg05752819	ARHGAP22	0.328005	-2.8086	2.06274	0.0433264	-3.87755
cg05760722	SCN8A	-0.421511	-0.619897	-2.06412	0.0431908	-3.87615
cg05776630	TMCO4	-0.283596	0.365402	-2.68031	0.00940656	-3.17953
cg05777356	NPFFR1	-0.246802	2.62687	-2.12151	0.0378773	-3.8172
cg05777357	LHX2	-0.425504	0.390755	-3.23244	0.00196628	-2.45173
cg05787038	DEFA10P	0.463717	-0.381514	2.695	0.00904399	-3.16133
cg05796763	ZBTB9	0.457858	-1.29559	2.05924	0.0436716	-3.88111
cg05799169	PLXNB2	0.371384	0.137457	2.13204	0.0369674	-3.80625
cg05807991	TRAM1L1	0.52494	-2.75867	2.32317	0.0234603	-3.60001
cg05811904	CREB3L2	-0.455349	0.330237	-2.33156	0.0229836	-3.59064
cg05813365	AGBL3	0.24048	-2.94411	2.16412	0.0343094	-3.7726
cg05816844	COL27A1	0.191607	-3.34911	2.43669	0.0177028	-3.47113
cg05819224	GALNT9	0.306291	0.450547	2.06257	0.0433426	-3.87772
cg05839201	CORO1A	0.139765	-2.80473	3.04348	0.00342639	-2.71034
cg05847772	MPZL3	-0.106064	-3.62092	-2.05741	0.0438522	-3.88296
cg05850205	ADHFE1	0.276091	-0.283773	2.63806	0.0105251	-3.23152
cg05854826	DNAJC18	0.409923	-4.89332	2.10948	0.0389415	-3.82967
cg05856036	SYNGAP1	-0.162106	0.664355	-2.28165	0.02595	-3.64597
cg05858042	MIR210	0.27612	-0.769016	2.19392	0.031993	-3.741
cg05858126	MIR146B	-0.336155	0.24708	-2.04746	0.0448495	-3.89302
cg05858889	LOC646999	-0.622114	-0.56587	-2.48953	0.0154836	-3.40959
cg05861255	RILPL2	0.362973	-1.03607	3.0301	0.00356116	-2.7283
cg05881156	USP49	0.219101	1.35276	2.425	0.0182305	-3.48461
cg05884870	ADAMTS17	-0.480106	0.398595	-2.29875	0.0248977	-3.62712
cg05889979	CYP26B1	-0.22598	3.77025	-2.22841	0.0294832	-3.70398
cg05893300	LRRC41	0.241212	-2.81677	3.10246	0.00288717	-2.63061
cg05897918	GALNT7	-0.117578	-2.67803	-2.15099	0.0353764	-3.78642
cg05902852	MAGI2	0.495786	-2.20647	2.14835	0.0355947	-3.7892
cg05903609	PRPF8	-0.183521	-1.62074	-2.55226	0.0131768	-3.33528
cg05906777	MIF4GD	-0.308348	-0.878243	-2.20798	0.030948	-3.72596
cg05913474	FAM83H	0.411844	0.339725	2.16098	0.0345621	-3.77591
cg05927579	KCNK15	0.358222	1.22955	2.1263	0.0374608	-3.81222
cg05929645	RAB3B	0.225312	-3.35196	2.2645	0.0270448	-3.66477
cg05932005	LOC440896	0.170589	-0.405559	2.10205	0.0396114	-3.83733
cg05932702	RAB21	0.392319	-1.73438	2.50808	0.0147663	-3.38776
cg05936441	SLC32A1	-0.315831	-0.591171	-2.05771	0.0438231	-3.88266
cg05939993	PROP1	0.446894	1.3042	2.77599	0.00726419	-3.05973
cg05940691	WDR64	0.544899	-0.962417	2.05765	0.0438284	-3.88271
cg05948955	GALNT9	0.443529	0.934494	2.8677	0.0056409	-2.94227
cg05950673	NDUFS6	-0.218438	2.57702	-2.07258	0.0423692	-3.86754
cg05959241	IPO7	-0.268844	1.83726	-2.38639	0.0200763	-3.52881
cg05964723	EDEM1	0.114076	-3.27477	2.2997	0.0248403	-3.62607
cg05968233	ALKBH7	0.324178	-0.74819	2.32076	0.0235986	-3.60269
cg05968904	FAM20C	0.379644	-0.392516	2.05094	0.0444983	-3.8895
cg05979332	SRCAP	0.396386	-2.26941	2.83435	0.00618797	-2.98528
cg05985447	RAB43	0.240453	-2.79522	4.19691	8.77107e-05	-1.01499
cg05985659	MAD2L1	-0.109765	-4.57961	-2.50031	0.0150628	-3.39691
cg05989672	DPP6	0.555355	0.848286	2.25758	0.0274981	-3.67233
cg05992079	SIT1	-0.365145	0.764422	-2.0201	0.0476932	-3.92048
cg05994982	PI4K2A	0.275385	-0.731337	2.25242	0.0278409	-3.67796
cg05995572	FLJ25363	0.178868	0.33927	2.78875	0.00701518	-3.04354
cg06001786	CCNJL	-0.392238	2.17519	-2.56662	0.0126944	-3.31808
cg06005199	C4orf23	-0.220383	2.71551	-2.0953	0.0402294	-3.84429
cg06011323	LY6G5C	0.429688	1.76848	2.22621	0.0296378	-3.70635
cg06013117	MSX2	-0.351208	0.777484	-2.022	0.0474909	-3.91859
cg06019590	SLC9A3	0.372218	-0.0296216	2.10714	0.0391519	-3.83209
cg06038201	RNASEH2C	-0.598394	-2.30035	-2.22434	0.02977	-3.70837
cg06038655	KLF14	-0.61444	-0.734318	-2.31183	0.024118	-3.61262
cg06066676	ATP10A	-0.345888	1.24453	-2.08175	0.0414935	-3.85818
cg06069206	PLCG2	-0.227634	2.68677	-2.16089	0.0345696	-3.77601
cg06071033	HCN4	0.381901	-0.411423	3.06795	0.0031922	-2.67738
cg06071058	BARX1	-0.470746	0.0978101	-3.01201	0.00375112	-2.75249
cg06078892	EBF2	0.60451	2.16344	2.37243	0.0207836	-3.54465
cg06080941	RGS17	0.426369	2.09919	2.232	0.0292328	-3.70011
cg06082432	SOCS1	0.167771	-3.68471	2.63662	0.010565	-3.23327
cg06084534	OR6K6	0.730512	0.449656	2.1151	0.0384411	-3.82385
cg06085476	CLOCK	0.197752	-2.42943	2.09615	0.0401505	-3.84341
cg06098138	ACTR8	-0.124794	2.76235	-2.57471	0.0124297	-3.30836
cg06112894	TRAPPC9	0.524931	-0.120271	2.36358	0.0212433	-3.55466
cg06123783	LOC441046	0.70922	-4.07612	2.74517	0.0078996	-3.09863
cg06130277	ERAL1	-0.0897083	-3.15627	-2.05162	0.04443	-3.88881
cg06138683	ZNF25	0.10354	-3.9261	2.25016	0.027992	-3.68042
cg06158650	TBX15	-0.377971	-0.451104	-2.56919	0.0126098	-3.31499
cg06159562	ANKRD11	-0.314997	1.95783	-2.08422	0.0412606	-3.85565
cg06161698	LOC400927	0.17075	-1.5573	2.54311	0.0134926	-3.3462
cg06166242	SASH1	0.384479	-2.52836	2.6553	0.0100548	-3.21037
cg06167719	HLCS	0.39945	-2.10797	2.06467	0.0431373	-3.8756
cg06177297	CP	0.529883	2.32034	2.44151	0.017489	-3.46555
cg06181470	ZBTB47	-0.251967	2.01553	-2.01762	0.0479583	-3.92296
cg06182031	H1FOO	-0.117022	2.55639	-2.45259	0.0170068	-3.45272
cg06230599	GSPT1	0.234772	1.27074	2.07189	0.0424354	-3.86824
cg06241374	CCDC85A	0.422048	1.03285	2.12571	0.0375119	-3.81284
cg06245711	FAM100B	0.372834	-0.653135	2.92687	0.00477894	-2.86517
cg06246950	SLC35E4	0.406061	-0.254384	2.0627	0.04333	-3.87759
cg06247015	SERHL2	0.502968	-4.15658	2.00642	0.0491721	-3.9341
cg06252333	C12orf60	0.289746	1.68652	2.31337	0.0240278	-3.61091
cg06252517	B4GALNT3	-0.342031	-3.20529	-2.41826	0.0185415	-3.49237
cg06270993	C7orf30	0.544415	0.975486	2.21023	0.0307833	-3.72354
cg06273125	SIDT1	0.312438	2.31195	2.16573	0.0341807	-3.7709
cg06277849	ANKRD37	-0.246345	-2.34348	-2.17326	0.0335838	-3.76294
cg06279296	DIP2C	-0.405099	1.78867	-2.54004	0.0136002	-3.34986
cg06283493	SOX2OT	0.386813	-1.1667	2.24224	0.0285272	-3.68902
cg06286521	C10orf11	-0.549334	1.9075	-2.08171	0.0414978	-3.85822
cg06293365	TMEM120A	0.479202	-0.00613313	2.70764	0.00874213	-3.1456
cg06294470	TBC1D22B	0.571467	0.393175	2.37044	0.0208862	-3.54691
cg06297145	NFXL1	0.184389	-2.98858	2.07705	0.0419409	-3.86299
cg06297541	CDR2	0.340806	-1.11543	2.64481	0.0103384	-3.22324
cg06298205	FAM12A	-0.444766	1.10518	-2.49055	0.0154433	-3.40839
cg06326072	DLAT	-0.146718	-2.45076	-2.84828	0.00595375	-2.96736
cg06329574	FGF3	-0.365037	-0.545076	-2.04983	0.0446102	-3.89063
cg06332111	H2AFY2	0.28681	-3.40565	2.01987	0.0477169	-3.9207
cg06342957	KLHL18	0.224125	1.97687	2.25101	0.0279349	-3.67949
cg06344474	MAPK15	0.434386	0.281254	2.71096	0.0086644	-3.14146
cg06350432	CLDN4	0.401921	0.817916	2.02369	0.0473117	-3.9169
cg06353655	TCERG1L	0.293612	0.169583	2.34842	0.0220523	-3.57174
cg06355422	C22orf34	0.547092	0.491402	2.19926	0.0315922	-3.73529
cg06374204	DUSP27	-0.183965	1.40285	-2.46862	0.0163301	-3.43406
cg06383709	HS3ST4	0.59654	0.901131	2.26602	0.0269461	-3.66311
cg06385118	LOC441046	0.68877	-3.82425	2.71098	0.00866391	-3.14144
cg06385187	WFDC2	0.462156	-3.57698	2.10794	0.0390794	-3.83126
cg06393098	FBXO46	0.298077	1.07523	2.06667	0.0429422	-3.87356
cg06398390	GRB10	-0.392677	2.34868	-2.46495	0.0164828	-3.43834
cg06400446	HCN2	0.402892	1.78421	2.31676	0.0238305	-3.60715
cg06406300	PLEKHH3	0.0835523	-4.67913	2.17587	0.0333794	-3.76018
cg06409153	ABCA5	0.434166	-1.80208	2.36319	0.0212637	-3.5551
cg06449486	COL23A1	0.264905	-3.67056	1.99928	0.0499593	-3.94117
cg06460475	RBMXL2	0.406869	0.534156	2.24006	0.0286756	-3.69138
cg06463109	AP1S1	-0.104298	2.75272	-2.12596	0.0374903	-3.81258
cg06466900	RASA3	-0.316769	2.22728	-2.40467	0.0191824	-3.50795
cg06476337	NDUFS4	-0.191756	-2.58913	-2.1525	0.0352526	-3.78484
cg06482989	SOX15	0.416734	1.71682	2.86469	0.00568843	-2.94617
cg06502570	CDH4	0.827025	1.9036	2.02421	0.0472556	-3.91637
cg06504518	SEC24A	0.28212	-3.38274	2.09549	0.0402121	-3.8441
cg06504526	SIM1	-0.67865	-0.360492	-2.87243	0.00556698	-2.93614
cg06507551	CTTNBP2	0.271383	-2.81661	2.10751	0.0391184	-3.8317
cg06510410	SENP5	-0.133514	-1.82257	-2.4762	0.0160184	-3.4252
cg06528223	DENND1C	0.39107	0.42257	2.0283	0.0468254	-3.91229
cg06533629	KLF14	-0.440453	-1.56141	-2.36367	0.0212385	-3.55456
cg06541888	ZNF259	0.120512	-3.99989	2.50633	0.0148324	-3.38981
cg06550057	FLJ32063	0.419697	-1.99133	2.71056	0.00867386	-3.14197
cg06555404	SLC25A10	-0.461421	2.61683	-2.28629	0.0256606	-3.64087
cg06557127	METT10D	0.301108	0.960877	2.06751	0.0428597	-3.8727
cg06562707	DENND3	0.14155	2.48387	2.00142	0.0497218	-3.93905
cg06562718	ARHGEF10	-1.05543	2.19508	-2.38452	0.0201698	-3.53093
cg06565184	MCPH1	-0.109025	3.24606	-2.01331	0.0484218	-3.92725
cg06566678	SLC9A5	0.205351	2.63187	2.04425	0.0451758	-3.89626
cg06574422	PPP1CC	0.39533	-0.735039	2.17892	0.0331414	-3.75695
cg06576010	CORO7	0.222023	-3.57714	2.30676	0.0244179	-3.61825
cg06582512	FAM113B	0.485227	0.858397	2.14522	0.035854	-3.79247
cg06584637	GGCT	0.164531	-4.07502	3.00859	0.00378809	-2.75705
cg06585027	PI4KB	-0.0872917	-3.41839	-2.53676	0.0137158	-3.35376
cg06589191	OPCML	0.564029	2.02767	2.01072	0.0487033	-3.92983
cg06602871	BEAN	-0.340064	1.51564	-2.04551	0.0450477	-3.89499
cg06603923	RHEB	0.34679	-0.650891	2.31197	0.0241098	-3.61246
cg06603997	PAQR5	0.152055	-3.19037	2.11808	0.0381787	-3.82077
cg06604206	RARS	0.34954	2.35248	2.11834	0.0381558	-3.8205
cg06614142	CNOT2	-0.0776938	-3.24523	-2.02126	0.0475692	-3.91932
cg06619077	PDZK1IP1	0.419599	-1.57289	2.26813	0.0268099	-3.66081
cg06623630	C22orf34	0.237531	-0.374954	2.15032	0.0354315	-3.78712
cg06624358	SAMD11	0.396713	-0.580058	2.35857	0.0215077	-3.56032
cg06624418	SPR	-0.17759	3.13139	-2.42562	0.0182021	-3.48389
cg06626184	LHX2	-0.419026	0.0860845	-2.34194	0.0224058	-3.57901
cg06630799	TFAP2C	0.424627	-1.98099	2.1258	0.037504	-3.81274
cg06631160	RRN3P2	-0.422954	-0.587483	-2.22655	0.0296142	-3.70599
cg06631603	PTPRZ1	0.357231	-4.0821	2.04958	0.0446357	-3.89088
cg06647026	DAPK3	-0.221607	4.7698	-2.68632	0.00925661	-3.17209
cg06654691	PLEKHH3	-0.481723	-1.33571	-2.13999	0.036292	-3.79794
cg06655349	S1PR2	-0.221853	2.45643	-2.28187	0.0259362	-3.64573
cg06657050	ONECUT1	-0.379024	-0.881729	-2.33025	0.0230574	-3.5921
cg06660015	SLC4A9	0.355151	-0.864202	2.12331	0.0377202	-3.81533
cg06668527	TRIB1	0.182867	-2.25086	2.51039	0.014679	-3.38503
cg06675273	ST8SIA2	-0.362426	-1.28535	-2.04761	0.0448342	-3.89287
cg06678548	AHRR	0.23177	2.35963	2.11301	0.0386266	-3.82602
cg06679347	VEGFC	0.576733	-2.78925	2.58514	0.0120962	-3.2958
cg06681220	ZNF287	0.433923	-4.24311	2.19985	0.0315481	-3.73466
cg06685007	HUNK	0.332249	-2.39288	2.23842	0.0287885	-3.69316
cg06685304	DIP2C	-0.122917	4.53624	-2.03108	0.046534	-3.9095
cg06689388	SRRM2	-0.101801	2.66295	-2.14528	0.0358495	-3.79241
cg06690548	SLC7A11	0.5051	0.671909	2.51977	0.0143294	-3.37393
cg06692606	SEMA3A	0.28897	1.74485	2.19735	0.0317347	-3.73733
cg06693575	CA5A	0.219975	0.288747	2.11253	0.0386692	-3.82651
cg06698844	ACTR1B	0.374308	0.40354	2.55167	0.013197	-3.33599
cg06704631	ZFYVE28	0.335872	0.539101	1.99915	0.0499731	-3.9413
cg06708315	SAP30BP	0.421317	0.439878	2.02306	0.0473779	-3.91752
cg06718696	EIF4A3	-0.113945	-3.53079	-2.06874	0.0427405	-3.87145
cg06728437	KLF7	0.399147	-3.06748	2.34835	0.0220558	-3.57182
cg06738379	RPS6KA2	0.238111	1.43275	2.04663	0.0449341	-3.89386
cg06740629	EPHA7	0.543254	-3.38993	2.42307	0.018319	-3.48683
cg06745145	CDK14	0.347291	2.29506	2.18682	0.0325315	-3.74855
cg06748884	CLEC16A	0.657924	1.55118	2.1553	0.0350231	-3.78189
cg06752814	MON1B	-0.0937582	-3.25308	-2.30299	0.0246427	-3.62243
cg06753055	EIF2AK4	0.513635	2.26752	2.54461	0.0134403	-3.34441
cg06753689	GTPBP4	0.11994	-3.20144	2.51766	0.0144074	-3.37643
cg06759648	C1orf88	0.24074	2.22374	2.02015	0.0476873	-3.92043
cg06760144	SELENBP1	0.212634	-0.156279	2.09	0.0407201	-3.84973
cg06761873	DPPA3	0.607184	1.90993	2.22698	0.0295838	-3.70552
cg06762532	ACN9	0.327693	1.5471	2.079	0.0417547	-3.86099
cg06766659	CALY	0.364468	-1.43322	2.20066	0.031488	-3.73379
cg06770091	TSNARE1	-0.0975624	3.50566	-2.01548	0.0481878	-3.92508
cg06772295	LRRC16B	0.182897	-2.37781	2.07101	0.0425204	-3.86914
cg06777194	SOX8	-0.418062	-0.433428	-2.2913	0.0253516	-3.63535
cg06778024	ANKRD11	-0.196434	2.61282	-2.06771	0.0428405	-3.8725
cg06783058	PYCRL	0.542072	1.53687	2.29045	0.0254036	-3.63628
cg06785746	WNT3	0.732291	-2.88292	2.53884	0.0136424	-3.35129
cg06798491	TAF6L	0.17331	-3.02255	2.55657	0.0130301	-3.33012
cg06801544	SELK	-0.108067	-4.69629	-2.31235	0.0240879	-3.61205
cg06815950	CUX2	-0.44855	1.01435	-2.20219	0.0313744	-3.73216
cg06821274	SSR2	0.0730527	-3.57126	2.08397	0.0412848	-3.85592
cg06826289	GLT1D1	0.365244	0.273915	2.01872	0.0478407	-3.92186
cg06832449	PARD3	-0.543398	-0.422489	-2.2097	0.0308222	-3.72412
cg06832551	TOR1AIP1	-0.145363	2.49887	-2.09741	0.0400349	-3.84211
cg06833981	BAT2	0.932458	2.47034	2.54283	0.0135023	-3.34653
cg06836736	ME1	0.325691	-1.61303	2.38151	0.020321	-3.53435
cg06841052	PARD3	-0.29324	3.30842	-2.10177	0.0396372	-3.83763
cg06845706	ZDHHC8P	0.577527	3.7941	2.23884	0.0287593	-3.6927
cg06849795	BCL9	0.240541	-3.18986	2.0383	0.0457851	-3.90225
cg06855422	GRID2	0.979312	-0.315186	2.5367	0.0137178	-3.35383
cg06859037	CALHM3	-0.436898	2.25373	-2.65931	0.00994821	-3.20544
cg06867482	FAM38A	0.36622	0.681548	2.31026	0.0242104	-3.61436
cg06869796	SLC13A4	0.267839	1.7955	2.04048	0.045561	-3.90006
cg06873590	ODZ2	0.361461	0.653768	2.32608	0.0232938	-3.59676
cg06884495	TDRD9	0.296966	0.45979	2.05465	0.0441268	-3.88575
cg06887260	TEC	0.235728	-4.45517	2.02298	0.0473864	-3.9176
cg06890747	LOC646999	-0.565207	0.271731	-2.20528	0.031146	-3.72885
cg06894204	HCN2	0.374814	1.21436	2.14047	0.0362516	-3.79744
cg06894628	SLURP1	-0.264493	1.39094	-2.00635	0.049179	-3.93416
cg06895640	C11orf75	0.418748	0.45395	2.176	0.0333686	-3.76004
cg06899844	PRR14	0.119176	-3.361	2.14994	0.0354629	-3.78752
cg06911238	FAAH	0.410585	0.748127	2.16258	0.0344332	-3.77422
cg06913219	NINL	0.348194	-0.41487	2.1394	0.0363418	-3.79856
cg06916591	SFXN5	-0.110555	3.15067	-2.29603	0.0250622	-3.63012
cg06919067	NSMCE1	0.596815	2.66066	2.09991	0.0398068	-3.83955
cg06924622	ESYT2	0.116484	-2.81454	2.34463	0.0222588	-3.576
cg06926815	RRN3	-0.410671	-2.07631	-2.22557	0.0296836	-3.70705
cg06934613	AFG3L2	0.112981	-3.97372	2.22609	0.0296468	-3.70649
cg06939451	SSBP2	-0.304285	1.95044	-2.46006	0.0166883	-3.44403
cg06940309	EIF1	0.0874982	-4.3145	2.55008	0.0132515	-3.33789
cg06945845	KLHL36	0.369778	0.203763	2.28377	0.0258172	-3.64364
cg06947614	SLCO1B3	0.402943	2.66455	2.25503	0.0276669	-3.67511
cg06948825	PM20D2	0.480782	-3.05651	2.57828	0.0123148	-3.30407
cg06950392	LDLR	0.132178	3.41512	2.18705	0.0325147	-3.74831
cg06957943	AMICA1	-0.129105	3.19925	-2.69818	0.00896712	-3.15737
cg06961122	MGST3	0.25178	-3.58911	2.1534	0.0351787	-3.78389
cg06974483	SPRY1	-0.107378	-2.77443	-2.02241	0.0474465	-3.91817
cg06979342	ABCA17P	-0.252249	4.25088	-2.33077	0.0230281	-3.59152
cg06982544	C1orf51	0.700655	-3.60891	2.13596	0.0366333	-3.80216
cg06990529	ZBTB44	-0.133952	2.45561	-2.00988	0.0487937	-3.93066
cg06995715	FOXL1	-0.496876	-1.10958	-2.79821	0.00683556	-3.0315
cg07002711	TTPA	0.234183	-3.80259	2.33084	0.0230242	-3.59144
cg07007118	CXCR7	0.413865	-1.35272	2.47793	0.015948	-3.42318
cg07012484	RCSD1	-0.377274	-0.315142	-2.31964	0.0236634	-3.60394
cg07014591	IL1RL2	-0.344087	2.72911	-2.14337	0.0360088	-3.79441
cg07015511	DNAH17	-0.235088	1.83742	-2.0147	0.0482718	-3.92586
cg07017119	GHITM	-0.152414	-2.56021	-3.26304	0.00179391	-2.40902
cg07018106	IRF2	0.099819	4.58792	2.78904	0.00700956	-3.04317
cg07021331	PLCG2	-0.222742	3.35083	-2.55432	0.0131063	-3.33281
cg07022477	HIF3A	0.398409	0.664438	2.32684	0.0232506	-3.59591
cg07025678	IFITM2	-0.222381	3.53976	-2.10348	0.0394817	-3.83586
cg07027119	CD160	-0.110871	1.5294	-2.05396	0.0441958	-3.88645
cg07038423	TRAM1L1	0.332424	-2.57391	2.62777	0.0108151	-3.24409
cg07038887	BLMH	0.21388	-3.93029	2.07613	0.0420281	-3.86392
cg07041488	CACNG3	0.578832	0.966829	2.23448	0.0290601	-3.69742
cg07055879	OR2A5	0.412635	0.40532	2.10961	0.0389301	-3.82954
cg07060117	CFDP1	-0.0935216	-2.82944	-2.07613	0.042029	-3.86393
cg07062456	HADHB	-0.103689	2.19212	-2.41309	0.0187829	-3.4983
cg07063883	CCDC64B	-0.256447	-0.327736	-2.14274	0.0360611	-3.79507
cg07070518	ADAP1	0.378903	1.83507	2.54842	0.0133085	-3.33987
cg07074033	TBCD	-0.163037	2.76816	-2.61276	0.0112514	-3.26236
cg07074042	RNF215	0.397732	0.159035	2.96074	0.00434229	-2.8206
cg07083464	HOXA13	-0.432986	-0.896813	-2.33256	0.0229277	-3.58953
cg07087686	TAL1	-0.319279	-0.62696	-2.07864	0.0417892	-3.86136
cg07088622	ZNF645	0.386728	2.17058	2.1066	0.0392003	-3.83265
cg07090074	CYB5B	0.275061	1.68431	2.02045	0.047656	-3.92013
cg07104135	IPO9	-0.251044	0.666481	-2.452	0.017032	-3.4534
cg07109115	MKX	-0.312463	0.248082	-2.02311	0.0473726	-3.91747
cg07115110	CCR1	-0.434784	-2.03388	-2.08404	0.0412776	-3.85584
cg07115879	KRT86	-0.198434	2.63449	-2.04679	0.044917	-3.89369
cg07118480	PCNT	0.371869	2.70918	2.57623	0.0123807	-3.30653
cg07119871	PRIMA1	-0.293833	2.37023	-2.24941	0.0280423	-3.68123
cg07136759	FAM66C	0.305191	2.09615	2.08007	0.0416526	-3.8599
cg07139162	ST3GAL2	-0.280181	2.16811	-2.12969	0.037169	-3.8087
cg07142954	KIF7	-0.307576	2.43557	-2.00831	0.0489656	-3.93222
cg07147863	FBXL18	-0.182603	-3.22089	-2.14458	0.0359073	-3.79314
cg07150506	CCT4	-0.114672	-4.18786	-2.38384	0.0202039	-3.53171
cg07151406	PGAM1	0.304354	-1.4563	2.19365	0.0320133	-3.74128
cg07153264	FBXL19	-0.196244	3.69263	-2.04832	0.0447625	-3.89215
cg07154904	FBRSL1	-0.220062	3.49803	-2.22238	0.0299093	-3.71049
cg07164161	KCNG2	-0.326209	-0.283457	-2.05419	0.0441733	-3.88622
cg07170231	RP5-1022P6.2	-0.0948762	-2.91928	-2.29138	0.0253464	-3.63526
cg07178877	RASA3	-0.412237	2.33896	-2.71751	0.0085129	-3.13329
cg07179068	EIF4E1B	0.287098	0.111747	2.08773	0.0409317	-3.85206
cg07190763	RASA3	-0.685006	-1.45658	-2.45917	0.0167257	-3.44506
cg07190966	DHX15	0.234583	-3.32233	2.20453	0.0312013	-3.72965
cg07198170	MAFK	0.264637	2.15823	2.03599	0.046023	-3.90457
cg07199862	TALDO1	0.503532	1.56282	2.09523	0.0402356	-3.84436
cg07199894	ULK1	0.118726	-2.13369	2.14076	0.0362271	-3.79714
cg07206001	ULBP2	0.177133	-2.61337	2.2792	0.0261041	-3.64867
cg07210669	S100P	0.396157	-0.518831	2.48344	0.0157259	-3.41673
cg07212327	FAM49B	-0.17261	3.05803	-2.34483	0.0222473	-3.57577
cg07219314	ZDHHC8P	0.165963	-1.6533	2.43621	0.0177239	-3.47168
cg07219710	EEF1A1	-0.0915791	-3.37457	-2.25706	0.0275323	-3.67289
cg07219769	LGALS1	0.405373	-2.30902	2.58881	0.0119807	-3.29137
cg07221526	PGAM1	0.279177	-1.71348	2.45634	0.0168461	-3.44836
cg07222505	FAM169A	0.491148	-0.438583	2.13959	0.0363257	-3.79836
cg07225829	SULT1A1	0.435237	1.35503	2.20128	0.0314421	-3.73313
cg07226802	RHPN1	-0.179583	1.62844	-2.48578	0.0156324	-3.41399
cg07228987	ITGAD	0.359019	0.390554	2.75325	0.00772836	-3.08846
cg07233159	LOX	0.387043	-2.681	2.21382	0.0305227	-3.71969
cg07239938	ELANE	0.281298	-0.412424	2.13146	0.037017	-3.80686
cg07243736	NARFL	-0.153253	3.93275	-2.15742	0.0348507	-3.77967
cg07244095	RASA3	-0.498214	0.290723	-2.57543	0.0124067	-3.3075
cg07244098	TRIM21	0.476621	-1.2433	2.58129	0.0122182	-3.30044
cg07253321	C6orf103	0.432536	1.51093	2.01599	0.0481336	-3.92458
cg07264025	MGAT4C	0.302766	-0.0688329	2.04939	0.044655	-3.89107
cg07270259	PARD3	-0.214517	2.41695	-2.07405	0.042228	-3.86605
cg07275207	C11orf75	-0.31349	1.95974	-2.00546	0.0492773	-3.93505
cg07283804	SERGEF	-0.285111	1.58599	-2.40723	0.0190604	-3.50502
cg07283859	TRIO	0.629458	1.79825	2.61452	0.0111994	-3.26022
cg07286216	LOC650226	0.404355	-0.369791	2.21574	0.0303841	-3.71763
cg07286881	MYBPC2	0.189013	-3.51747	2.9603	0.00434762	-2.82117
cg07291100	CLSTN2	0.33684	-0.725067	2.1489	0.0355492	-3.78862
cg07293387	METT10D	0.294241	1.90535	2.1368	0.0365616	-3.80128
cg07295918	CCND1	-0.211816	1.26601	-2.0005	0.049824	-3.93997
cg07301505	PI4K2A	-0.0887924	-3.59017	-2.23259	0.0291915	-3.69947
cg07304015	MTCH2	0.39582	2.50022	2.03627	0.0459943	-3.90429
cg07324293	OSBP2	-0.233054	1.84385	-2.36569	0.0211328	-3.55227
cg07333905	RANBP9	0.237979	-2.92259	2.02117	0.0475791	-3.91941
cg07337290	APOB48R	-0.468359	0.119542	-2.24431	0.0283859	-3.68677
cg07343474	TXN2	0.0961979	-3.92067	2.0793	0.041726	-3.86068
cg07351267	LRP3	0.213317	0.0672909	2.07447	0.0421877	-3.86562
cg07365274	ZBTB20	0.299206	-4.42255	2.07781	0.0418685	-3.86221
cg07368443	PLK3	0.306578	-1.13019	2.4304	0.0179849	-3.47839
cg07378217	ZNF329	-0.0588231	-0.258262	-2.19379	0.0320022	-3.74113
cg07378350	GDF5	0.351079	-0.0414923	2.1797	0.0330806	-3.75612
cg07381788	CYP2E1	0.581695	1.504	2.33165	0.0229788	-3.59054
cg07385723	WDR27	-0.25178	2.63406	-2.0069	0.049119	-3.93362
cg07395806	OR2G6	0.558774	1.89107	2.03173	0.0464659	-3.90884
cg07401258	C21orf29	0.279781	0.645083	2.15235	0.0352648	-3.785
cg07420961	NPHP4	-0.0829597	-3.12793	-2.1395	0.0363334	-3.79846
cg07422042	LOC150197	-0.389049	-0.334177	-2.27727	0.0262257	-3.65078
cg07425541	GPR137B	0.126728	-3.95728	2.8318	0.00623162	-2.98855
cg07426533	TOX	0.597712	1.29388	2.08964	0.0407535	-3.8501
cg07427138	DYM	-0.0821841	-4.00593	-2.12889	0.0372377	-3.80953
cg07451886	MMP25	-0.269286	-0.662141	-2.00791	0.0490084	-3.93261
cg07456797	PSMB3	-0.0681059	-3.37548	-1.99928	0.0499592	-3.94117
cg07461318	NTN4	0.334436	-2.94976	2.09283	0.0404576	-3.84683
cg07462670	RPL30	0.231002	-3.50577	2.5501	0.0132506	-3.33786
cg07466386	LOC154449	0.341159	1.54971	2.01848	0.0478661	-3.9221
cg07470341	GALM	0.299677	0.920304	2.03315	0.0463181	-3.90742
cg07472227	ERF	0.0966816	-3.55167	2.10102	0.039705	-3.83839
cg07477034	HLF	0.471936	-0.942939	2.3397	0.0225294	-3.58152
cg07485723	COL23A1	0.300048	-4.27182	2.09787	0.039993	-3.84164
cg07494987	TMEM27	-0.145255	1.18285	-2.21723	0.0302771	-3.71603
cg07495405	FHOD3	-0.624683	1.29716	-2.05312	0.0442805	-3.88731
cg07508609	NUBP1	0.159382	-2.85602	2.26873	0.0267713	-3.66015
cg07512676	ANKRD40	0.142069	-2.58841	2.93095	0.00472429	-2.85982
cg07513383	ZNF432	-0.241507	-2.90453	-2.55781	0.0129883	-3.32864
cg07514594	TAF4	-0.0877449	-3.32796	-2.18707	0.032513	-3.74829
cg07515196	DOCK6	-0.435771	-0.434671	-2.02376	0.0473036	-3.91682
cg07523904	FAM73B	0.109247	-2.21951	2.06873	0.0427416	-3.87147
cg07525100	FGD1	0.347745	-0.0089156	2.43161	0.0179306	-3.477
cg07535762	VPS52	-0.13656	2.75273	-2.54221	0.013524	-3.34727
cg07542864	APOB48R	-0.242161	4.65945	-2.29876	0.0248969	-3.62711
cg07550694	BCYRN1	0.232069	1.95577	2.01456	0.0482875	-3.92601
cg07550809	DKFZp761E198	0.931536	-3.3737	2.34468	0.0222558	-3.57594
cg07561610	ZC3H12D	0.309816	0.150186	2.62166	0.0109908	-3.25153
cg07570663	CCDC144A	-0.255978	0.210623	-2.27377	0.0264485	-3.65463
cg07571282	BCMO1	0.335942	2.00739	2.09647	0.0401218	-3.84309
cg07574896	IRF4	0.427397	0.674235	2.39601	0.0196013	-3.51784
cg07576033	C16orf11	0.28951	0.538675	2.05751	0.0438426	-3.88286
cg07578618	MRPL23	-0.443548	-2.94711	-2.7981	0.00683771	-3.03165
cg07580783	PPP1R12C	0.247582	-1.71155	2.86173	0.00573546	-2.95
cg07584620	MORN1	-0.856771	2.22607	-2.54218	0.013525	-3.34731
cg07595909	VPS4B	-0.0803661	-3.4498	-2.03058	0.0465857	-3.90999
cg07607525	PRKY	-0.107701	-0.0428157	-2.25458	0.0276965	-3.6756
cg07612655	PTGIS	-0.304103	0.269301	-2.22522	0.0297083	-3.70743
cg07612827	FLJ25758	0.5367	0.483424	2.70651	0.00876885	-3.14702
cg07624639	PDX1	0.686702	-2.77471	2.11247	0.0386744	-3.82657
cg07630301	MYO3A	0.380595	-1.13094	2.62591	0.0108684	-3.24636
cg07637599	GPR133	0.348866	2.2336	2.10253	0.0395684	-3.83685
cg07641284	C16orf54	-0.388793	0.808745	-2.03108	0.0465334	-3.90949
cg07654678	NECAB2	0.127715	-3.13551	2.03307	0.0463258	-3.9075
cg07655261	NANOG	-0.676716	1.54493	-2.91097	0.00499768	-2.88599
cg07655479	LOC441046	0.370958	-2.67822	2.64609	0.0103036	-3.22168
cg07655627	NUDT12	0.401817	-1.92861	2.46631	0.0164258	-3.43675
cg07666882	NUDT12	0.335434	-3.40672	2.00537	0.049287	-3.93514
cg07669891	MYRIP	0.225144	-2.46024	2.04999	0.0445947	-3.89047
cg07674403	GADD45GIP1	0.12639	-3.45355	2.15301	0.0352106	-3.7843
cg07680195	PGLS	0.0863333	-1.18751	1.99928	0.0499593	-3.94117
cg07685728	ZNF586	0.255266	-2.84305	2.34719	0.0221191	-3.57313
cg07687043	ZMYND19	0.114721	-4.07275	2.15223	0.0352742	-3.78512
cg07693058	IREB2	0.188838	-3.68992	2.31926	0.023685	-3.60436
cg07695089	SLC45A4	0.178182	3.48649	2.64934	0.010215	-3.21769
cg07696842	CHST11	-0.480499	-1.0018	-2.34211	0.0223965	-3.57882
cg07704144	SNPH	0.268379	-3.27119	2.20752	0.0309819	-3.72646
cg07704824	C20orf151	0.294352	0.0440027	2.20928	0.030853	-3.72457
cg07710560	PRMT8	-0.56889	-1.90844	-2.38971	0.0199111	-3.52502
cg07711097	GML	0.445928	0.571239	3.28718	0.00166806	-2.37516
cg07712243	MLLT1	0.160164	-3.14578	2.74005	0.00801014	-3.10507
cg07716603	IRAK2	0.403374	1.49393	2.17684	0.0333031	-3.75915
cg07722368	PYY2	0.436114	-2.18605	2.14317	0.0360251	-3.79462
cg07745373	DTX4	0.402847	-0.870635	2.23934	0.0287253	-3.69216
cg07745886	IKBKB	-0.494626	0.519435	-2.78996	0.00699198	-3.042
cg07753967	FRG1B	0.671774	-0.768288	2.59119	0.0119062	-3.28849
cg07761386	SUCLG2	0.285735	1.92644	2.26139	0.0272479	-3.66818
cg07777270	NR2F1	-0.382892	1.60685	-2.23135	0.0292779	-3.70081
cg07777433	CSMD1	0.39787	1.0156	2.21237	0.030628	-3.72125
cg07779699	FAM71E2	0.263735	1.40631	2.04213	0.0453913	-3.89839
cg07782925	ZNF343	-0.112058	-4.74901	-2.87133	0.00558414	-2.93757
cg07783134	LRRC7	0.579894	2.59376	2.17021	0.0338246	-3.76617
cg07793207	LGI1	-0.428309	-1.54432	-2.12188	0.0378449	-3.81682
cg07795346	USP10	-0.12162	2.87463	-2.1048	0.0393623	-3.8345
cg07796220	MFSD6L	0.274273	0.478884	2.21784	0.0302334	-3.71537
cg07810282	TCERG1L	0.773838	2.24752	2.05007	0.0445866	-3.89039
cg07813495	ZC3H12A	-0.233468	0.323652	-2.4054	0.0191477	-3.50711
cg07814122	KIAA1467	0.49158	-0.389354	2.38588	0.0201014	-3.52938
cg07828294	FRMD4A	0.587095	1.56321	2.42425	0.0182648	-3.48547
cg07830695	NAPSB	-0.135371	2.07993	-2.03954	0.0456574	-3.901
cg07831277	PIP4K2A	0.270361	-0.44056	2.22928	0.0294222	-3.70304
cg07834743	ADAMTS16	0.439023	-1.6833	2.05239	0.0443535	-3.88804
cg07837516	DNAL4	0.0928805	-3.77595	2.02486	0.0471869	-3.91572
cg07838495	RPL26	0.642748	2.32085	2.06039	0.0435579	-3.87994
cg07845895	IFNGR2	0.182242	-2.92366	3.12152	0.00273064	-2.60465
cg07848636	NOM1	-0.304462	3.09717	-2.12635	0.0374566	-3.81217
cg07869232	RASA3	-0.304159	1.56965	-2.21132	0.0307043	-3.72238
cg07869763	LDHB	0.37713	-2.84759	2.06668	0.0429414	-3.87356
cg07875692	TMEM5	0.421851	1.6145	2.14797	0.0356262	-3.78959
cg07880971	FBRSL1	-0.380589	-0.129536	-2.23079	0.0293169	-3.70141
cg07884735	SDAD1	-0.13377	-2.41182	-2.18493	0.0326765	-3.75056
cg07887168	SRL	0.302862	-0.453308	2.19143	0.0321808	-3.74365
cg07889201	ZNF343	0.31951	-1.49027	2.42915	0.0180416	-3.47983
cg07890785	FAM64A	-0.302948	0.98656	-2.02411	0.0472671	-3.91648
cg07892422	HOXC13	0.273846	-1.04077	2.20062	0.031491	-3.73384
cg07895169	TTC23L	0.392873	-3.51498	2.47235	0.0161758	-3.4297
cg07896984	RAB40C	-0.129949	2.01066	-2.05476	0.0441159	-3.88564
cg07898360	PRSSL1	0.454318	1.61885	2.36015	0.021424	-3.55853
cg07908142	RPL39	0.263718	-1.04353	2.31994	0.023646	-3.6036
cg07913887	KIF6	0.486268	-0.925468	3.82047	0.000310489	-1.59529
cg07915282	RASSF3	-0.108306	-2.81006	-2.20889	0.0308817	-3.72499
cg07917127	C4orf37	0.273485	-3.18115	2.05855	0.04374	-3.88181
cg07917609	RXFP3	-0.268644	-0.158792	-2.03484	0.0461426	-3.90573
cg07919145	SYNGR1	0.288037	-0.285367	2.07079	0.0425422	-3.86937
cg07921503	CHST12	-0.367662	-0.100718	-2.23996	0.028683	-3.69149
cg07922062	CEBPG	0.352394	1.07532	2.06503	0.0431024	-3.87523
cg07935568	MLNR	0.430264	-1.46419	2.43419	0.0178143	-3.47401
cg07942995	ZSCAN1	0.335648	1.94778	2.88279	0.00540837	-2.92271
cg07957551	ZNF843	-0.196351	1.82228	-2.17571	0.0333914	-3.76034
cg07962360	B4GALNT1	-0.286532	2.45289	-2.47065	0.016246	-3.43169
cg07970724	BAT4	-0.137107	1.92676	-2.33812	0.0226171	-3.5833
cg07979385	APC2	0.235134	0.0122511	2.21394	0.0305145	-3.71957
cg07989740	TNFRSF21	-0.33581	2.1849	-2.17641	0.0333368	-3.75961
cg07992196	LOC285419	0.497291	1.17785	2.60653	0.0114371	-3.26993
cg07992340	AARS	0.223848	2.21902	2.1908	0.0322286	-3.74432
cg07994987	NRN1	-0.872599	-2.31327	-2.04366	0.0452359	-3.89685
cg08001520	RAB43	0.192075	-2.80845	2.67497	0.00954173	-3.18613
cg08007378	WHAMM	0.264508	-1.16578	2.02609	0.0470572	-3.91449
cg08010331	HLA-DPA1	0.614389	1.39553	2.22919	0.0294291	-3.70315
cg08016315	RNF222	0.315088	1.01677	2.04847	0.0447471	-3.892
cg08029996	RGS17	0.279401	-3.04422	2.33611	0.0227288	-3.58555
cg08033284	LBH	0.216935	-3.33817	2.24613	0.0282631	-3.6848
cg08047939	ZNF264	0.337613	-1.74042	2.53689	0.0137113	-3.35361
cg08054032	FCGBP	-0.279872	0.524849	-2.54637	0.0133792	-3.34231
cg08058610	ZNF836	-0.10862	-3.19056	-2.40975	0.0189407	-3.50213
cg08065657	HAS1	-0.337551	-0.0224024	-2.06429	0.0431745	-3.87598
cg08065733	INHBB	-0.270861	-0.559298	-3.01237	0.0037473	-2.75201
cg08066132	CBR4	0.10262	-1.95097	2.42716	0.0181322	-3.48213
cg08079580	BNIP3	0.262635	-2.90135	2.39386	0.0197066	-3.5203
cg08080195	CDC42EP3	-0.588027	-0.0824318	-2.82289	0.00638699	-2.99998
cg08081805	RASIP1	0.573598	-2.99206	2.52516	0.0141322	-3.36755
cg08084984	XYLT1	1.4528	-2.19256	3.039	0.00347092	-2.71635
cg08085267	C17orf57	0.647158	-1.62729	2.03234	0.0464024	-3.90823
cg08085597	HCG27	0.304911	-0.436527	2.22052	0.0300415	-3.71249
cg08087657	RDH13	0.439654	2.24741	2.3779	0.0205035	-3.53845
cg08088222	ORAI1	-0.264062	2.10812	-2.17845	0.0331777	-3.75744
cg08091771	PTPRG	0.216503	0.114564	2.09179	0.0405537	-3.8479
cg08100221	NARFL	-0.259953	3.15369	-2.16924	0.0339018	-3.7672
cg08100536	EP400NL	0.0998197	4.34825	2.10528	0.0393191	-3.83401
cg08128768	DAB2IP	-0.609642	-1.73715	-2.18586	0.0326052	-3.74957
cg08130814	MCPH1	0.255487	2.25886	2.00712	0.0490957	-3.93341
cg08141395	MAML2	-0.779829	-0.591723	-2.46735	0.0163827	-3.43554
cg08145625	TRAM1L1	0.252516	-2.51665	2.06162	0.0434365	-3.87869
cg08147226	ERICH1	0.115983	3.69571	2.0971	0.0400638	-3.84244
cg08147703	TMEM120A	0.0980335	-4.56972	2.21209	0.0306482	-3.72155
cg08160224	AHNAK	0.535693	0.373938	2.67158	0.00962847	-3.19032
cg08166154	TELO2	-0.314472	2.08407	-2.39251	0.0197727	-3.52183
cg08180884	ZNF536	0.56882	1.30183	2.04537	0.0450618	-3.89513
cg08186362	HRH3	-0.533458	-2.95734	-2.09704	0.040069	-3.8425
cg08187469	SF3B14	-0.0951788	-4.13007	-2.02153	0.0475404	-3.91905
cg08188609	MIR521-2	0.515322	1.86261	2.10222	0.0395965	-3.83717
cg08210300	EXOSC8	-0.101552	-2.44566	-2.24639	0.0282453	-3.68451
cg08210706	SERPINA5	-1.34896	1.12336	-2.56997	0.0125844	-3.31407
cg08219531	RYBP	0.103431	-4.06171	2.13418	0.0367847	-3.80402
cg08241477	NR2F1	-0.438578	0.839909	-2.66312	0.00984791	-3.20075
cg08246428	CASQ1	0.241755	-0.313447	2.00762	0.0490407	-3.93291
cg08253809	C14orf119	-1.00112	0.29896	-2.70971	0.00869365	-3.14303
cg08262496	C16orf52	0.260303	2.50576	2.30648	0.0244345	-3.61856
cg08270491	KIAA0196	-0.248275	2.6812	-2.0792	0.0417361	-3.86079
cg08270734	SART3	0.112056	3.13176	2.26846	0.0267884	-3.66044
cg08279008	POLR1A	-0.468675	-0.831533	-2.24093	0.0286164	-3.69044
cg08285630	CCDC49	0.0997528	-4.27088	2.45649	0.0168397	-3.44818
cg08289525	ST8SIA2	-0.395903	0.498511	-2.12817	0.0372994	-3.81028
cg08301459	NAA38	-0.111484	-4.69	-2.1081	0.0390654	-3.8311
cg08303922	GLIS3	0.481051	-2.53181	2.16053	0.0345987	-3.77639
cg08304478	ASGR1	0.119503	-4.07932	2.45435	0.016931	-3.45066
cg08307963	GJA5	-0.398182	-1.31404	-2.05381	0.0442108	-3.8866
cg08314300	TBR1	-0.299986	1.76732	-2.16453	0.0342766	-3.77217
cg08314408	SEPHS2	0.279635	-1.66608	2.07211	0.0424147	-3.86803
cg08319936	TMEM132D	0.433247	1.17595	2.55073	0.013229	-3.33711
cg08336234	IPO11	-0.258716	1.37901	-2.30859	0.024309	-3.61622
cg08336641	L3MBTL4	0.291087	-1.07445	2.39257	0.01977	-3.52177
cg08337366	ALKBH7	0.432461	1.98193	2.18951	0.0323265	-3.74569
cg08341821	RPS23	-0.0789918	-3.08473	-2.04092	0.0455161	-3.89962
cg08346159	NPY5R	0.745725	-2.89704	2.5007	0.0150479	-3.39645
cg08361238	PTGFRN	0.222579	0.0686387	2.13009	0.0371339	-3.80828
cg08364403	NTM	0.513476	2.39705	2.07886	0.0417682	-3.86114
cg08373989	HSPA1L	-0.435529	2.19337	-2.53643	0.0137275	-3.35416
cg08386692	SHISA2	0.24839	-0.97556	2.23515	0.0290138	-3.6967
cg08387815	C7orf51	0.10451	-4.0195	2.02463	0.0472112	-3.91595
cg08394355	BAT2	-0.0978523	2.48543	-2.04318	0.0452845	-3.89734
cg08397993	NCRNA00171	-0.503955	-1.59663	-2.23992	0.0286856	-3.69154
cg08404221	FBXO27	0.465986	-1.47523	2.17006	0.0338368	-3.76633
cg08405219	PM20D2	0.447407	-3.7723	2.19233	0.0321124	-3.74268
cg08408976	SRRM2	-0.0995774	3.15642	-2.44593	0.0172953	-3.46044
cg08415977	SORCS2	-0.164935	0.161644	-2.15762	0.034834	-3.77945
cg08425482	OR2A5	0.406853	1.1762	2.54599	0.0133923	-3.34276
cg08433011	RUNX1	-0.763284	0.484309	-3.11123	0.00281411	-2.61867
cg08433538	RALGPS1	0.350155	-2.18616	2.79133	0.00696571	-3.04026
cg08434300	ARHGAP22	-0.169864	2.93784	-2.21288	0.0305911	-3.72071
cg08440934	UBLCP1	0.265287	-1.50205	2.02479	0.0471945	-3.91579
cg08442149	ADARB2	0.797662	2.28457	2.21658	0.0303239	-3.71673
cg08443203	ZNF114	0.280564	-0.0784398	2.54993	0.0132565	-3.33806
cg08450982	NUMBL	0.455531	0.434831	2.74252	0.00795658	-3.10196
cg08454110	CNBD1	0.139352	1.08505	2.13868	0.036403	-3.79932
cg08457232	WDR37	-0.381384	1.94946	-2.50543	0.0148669	-3.39088
cg08458170	TSHZ3	0.759663	2.32509	2.02976	0.0466723	-3.91082
cg08461107	KIAA1462	0.493259	-1.66355	2.81649	0.00650065	-3.00818
cg08464734	RASA3	-0.241713	3.14101	-2.0276	0.0468988	-3.91299
cg08475446	ERGIC1	-0.0908283	-2.88948	-2.0772	0.041926	-3.86283
cg08477779	PANK3	0.279271	-0.224109	2.51458	0.0145218	-3.38007
cg08483376	EVX1	-0.492773	-1.43568	-2.30416	0.0245723	-3.62113
cg08492173	IRX1	-0.499183	-0.407833	-2.01449	0.0482946	-3.92607
cg08495374	FLJ22536	0.350101	0.142915	2.06715	0.0428951	-3.87307
cg08497649	TUBGCP2	-0.115891	4.73869	-2.61836	0.0110866	-3.25555
cg08503613	GALNT9	0.227102	0.849139	2.22325	0.0298473	-3.70955
cg08519385	HAS1	0.336996	1.23253	2.17344	0.0335701	-3.76276
cg08525845	DBX1	-0.376378	-0.389329	-2.32972	0.0230876	-3.5927
cg08534016	SPEF2	0.346811	0.0944568	2.01905	0.0478054	-3.92153
cg08554556	TMEM132D	0.518612	0.34082	2.09247	0.0404909	-3.8472
cg08564307	LIMK2	0.128709	-3.74191	2.50991	0.0146969	-3.38559
cg08571469	FOXK1	-0.119259	3.64874	-2.58586	0.0120734	-3.29493
cg08575875	MYOM2	0.309737	2.9102	2.12532	0.0375457	-3.81324
cg08577913	TRIM21	0.33695	-1.58326	2.1371	0.0365365	-3.80097
cg08578323	NDUFAF2	-0.200709	3.19754	-3.78378	0.000350063	-1.65069
cg08594218	HOXB13	-0.639953	-0.919075	-2.12007	0.0380033	-3.8187
cg08594554	TTYH2	-0.566319	0.758864	-2.95807	0.00437528	-2.82412
cg08597764	C6orf145	0.122486	-4.48614	2.29553	0.0250926	-3.63067
cg08597832	TOP1MT	0.454245	0.470837	2.13385	0.0368124	-3.80436
cg08604960	ADAM19	0.410461	1.04692	2.50498	0.0148838	-3.39141
cg08611411	LOR	0.461843	-3.67784	2.61964	0.0110494	-3.25399
cg08617982	RASA3	-0.475338	0.385513	-2.21646	0.0303321	-3.71685
cg08623535	LOX	0.440692	-1.59479	2.19717	0.0317481	-3.73752
cg08627397	MC1R	0.241752	-0.868253	2.01254	0.0485059	-3.92802
cg08636536	TRA2A	0.0895744	-3.51819	2.34037	0.0224923	-3.58077
cg08638929	TSPAN1	0.465087	1.04707	2.54796	0.0133244	-3.34042
cg08649201	NRN1	-0.465437	-0.955025	-2.05043	0.04455	-3.89002
cg08650629	FAM109B	0.225065	0.14035	2.03811	0.045804	-3.90243
cg08657449	TM7SF4	-0.332076	1.74968	-2.1509	0.0353839	-3.78652
cg08684663	OLR1	0.609321	1.22122	2.96987	0.004231	-2.80852
cg08690999	NR2F1	-0.515682	1.89792	-3.67871	0.000491925	-1.80803
cg08695855	COL1A2	0.379878	-1.4083	2.09956	0.0398388	-3.83991
cg08703038	GPR133	0.482969	0.842783	2.38343	0.0202242	-3.53217
cg08736072	C16orf91	0.273411	-0.248395	2.28989	0.0254383	-3.63691
cg08736216	ZYG11A	0.415865	0.233447	2.4627	0.016577	-3.44096
cg08737743	CLVS2	0.414281	-1.55743	2.75441	0.00770397	-3.087
cg08739282	DHX15	0.3036	-1.87251	2.07022	0.0425968	-3.86995
cg08745965	MIR886	-0.410878	-0.275337	-2.1555	0.0350071	-3.78169
cg08747777	CDH11	0.360325	-3.50872	2.26477	0.0270277	-3.66449
cg08767743	WDR60	-0.267376	4.21166	-2.12942	0.0371921	-3.80898
cg08777992	MCPH1	0.395535	0.701727	2.05391	0.0442014	-3.88651
cg08784966	TBC1D22B	0.429285	0.71197	2.40892	0.0189798	-3.50308
cg08787039	C1orf14	-0.510962	1.14912	-2.36406	0.0212182	-3.55412
cg08787401	EPHA4	-0.357498	-2.31233	-2.69218	0.00911269	-3.16483
cg08796640	EXT1	0.169528	-4.09675	2.50617	0.0148387	-3.39001
cg08803500	HOXC13	-0.500436	-1.57006	-2.225	0.0297233	-3.70766
cg08806681	TMEM190	0.455178	0.212571	2.27277	0.026512	-3.65572
cg08815306	VWA3A	0.503255	1.79298	2.18761	0.0324715	-3.74771
cg08819417	FAM100A	-0.189347	3.11642	-2.4628	0.0165727	-3.44084
cg08823894	ASCL4	0.44961	1.51784	2.19335	0.0320353	-3.7416
cg08829299	ATHL1	0.639546	-1.51042	2.18342	0.0327929	-3.75217
cg08852149	SHD	0.359382	1.03956	2.25248	0.0278364	-3.67789
cg08856529	KCNK9	-0.726882	0.00871524	-2.52491	0.0141412	-3.36784
cg08861456	OR2L13	0.482981	0.0421996	2.60006	0.0116329	-3.27777
cg08865099	EVX1	-0.377302	1.3875	-2.36271	0.0212889	-3.55564
cg08872581	MBTPS2	0.312666	-1.29343	2.35106	0.0219095	-3.56878
cg08874645	SLC29A3	-0.234139	0.354169	-2.1733	0.033581	-3.7629
cg08875357	RTN4RL1	-0.137324	2.76701	-2.01064	0.048711	-3.9299
cg08882216	EPHB6	0.514317	1.95145	2.32849	0.0231573	-3.59407
cg08886790	ACOXL	-0.240483	2.43253	-2.05296	0.0442961	-3.88746
cg08891656	RHOBTB3	0.311685	-3.73142	2.65268	0.0101249	-3.21359
cg08895440	C1orf216	0.194743	-3.06168	2.76156	0.00755569	-3.07798
cg08899593	GALNT9	0.420086	1.09264	2.04146	0.0454601	-3.89907
cg08903069	TCF7L1	-0.473528	0.765296	-2.87081	0.00559231	-2.93825
cg08908992	PSTK	0.211535	-2.71659	2.82495	0.00635073	-2.99734
cg08909914	SNTG1	0.547026	0.482381	2.13025	0.0371205	-3.80811
cg08912652	SNX19	-0.772028	2.38369	-2.53594	0.0137448	-3.35474
cg08913922	ODZ4	-0.48205	-0.420969	-2.33373	0.0228618	-3.58821
cg08932994	SUGT1L1	0.15467	1.06243	2.28077	0.0260052	-3.64694
cg08933939	PRDM13	0.421304	-1.70744	2.14428	0.0359328	-3.79346
cg08934785	HOXA7	-0.530114	-0.640037	-2.01909	0.0478003	-3.92148
cg08940424	POLM	-0.109351	-3.79946	-2.64907	0.0102224	-3.21802
cg08941195	FAM171A2	0.228388	-2.02601	2.23563	0.0289803	-3.69617
cg08944940	MACF1	0.482631	1.02257	2.03191	0.0464469	-3.90866
cg08944961	CUX2	-0.605331	0.321368	-2.13129	0.0370311	-3.80703
cg08950757	SOX4	-0.0942823	-3.10085	-2.69399	0.00906859	-3.16258
cg08961547	GPR120	-0.446297	-0.335112	-2.40034	0.019391	-3.5129
cg08966768	LOC729668	-0.159101	1.5953	-2.14336	0.0360094	-3.79442
cg08976810	FGF10	0.394811	-2.44335	2.05228	0.0443638	-3.88815
cg08987989	PGGT1B	0.392781	0.918501	2.36076	0.0213915	-3.55784
cg08997294	WDR70	-0.0828847	2.76318	-2.25066	0.0279582	-3.67987
cg09000385	FOXO1	-0.496077	-0.335529	-2.27976	0.0260685	-3.64805
cg09010837	TRAP1	0.135748	-4.52142	2.55822	0.0129745	-3.32815
cg09012001	IFFO2	-0.275996	0.781247	-2.20847	0.0309121	-3.72543
cg09022952	SF3B2	-0.10901	-4.61955	-2.88291	0.00540654	-2.92255
cg09032314	C8orf34	0.353712	-0.367803	2.28109	0.0259852	-3.64659
cg09033641	ANKRD11	0.314892	0.0279834	2.00598	0.0492196	-3.93453
cg09037712	HLCS	0.300815	-0.391157	2.02892	0.0467599	-3.91166
cg09039751	CHST1	-0.369476	2.37156	-2.2619	0.0272143	-3.66761
cg09045105	BOLA1	0.358403	1.06906	2.15077	0.0353949	-3.78666
cg09049672	ADRA1B	0.493191	-2.50461	2.19313	0.0320524	-3.74184
cg09050331	PRDM14	-0.310276	0.180309	-2.21259	0.0306123	-3.72102
cg09052453	ADAMTS19	0.294569	-4.37616	2.10151	0.0396612	-3.8379
cg09055992	DLGAP2	0.759197	1.93424	2.10445	0.0393939	-3.83486
cg09067818	PLEKHH2	0.28244	-3.62159	2.12037	0.0379776	-3.81839
cg09069694	FAM65A	0.270616	-2.51997	2.24157	0.0285726	-3.68974
cg09079275	ADAM19	0.410578	-2.07954	2.27928	0.0260993	-3.64859
cg09082617	MIR645	0.374568	1.41282	2.31546	0.0239057	-3.60859
cg09086740	SDF2	0.251685	2.44846	2.06171	0.0434274	-3.8786
cg09102447	IMPAD1	0.487091	-0.567762	3.29145	0.00164669	-2.36916
cg09107603	C4orf34	-0.14945	2.58061	-2.68019	0.00940955	-3.17968
cg09110292	ARHGAP12	0.167931	-3.29296	2.12279	0.0377662	-3.81588
cg09113850	ORAI3	0.100561	-4.43034	2.16874	0.0339413	-3.76773
cg09118312	LDHB	0.581122	-3.19116	2.08128	0.0415384	-3.85866
cg09123484	DNAJC16	-0.148035	-3.60571	-2.60363	0.0115246	-3.27345
cg09125882	FBRSL1	0.104122	-4.54382	2.41188	0.0188398	-3.49968
cg09166085	NUDT12	0.312405	-2.07479	2.2204	0.03005	-3.71262
cg09167911	ZYG11A	0.613405	0.352067	3.20931	0.00210681	-2.48388
cg09171672	RPS19BP1	-0.0773914	-2.36116	-2.00623	0.0491931	-3.93429
cg09183181	TET1	0.18795	-2.12739	2.23651	0.02892	-3.69523
cg09198031	HEATR2	0.0677174	3.59242	2.06403	0.0431997	-3.87624
cg09199330	CYP27C1	-0.472837	2.90511	-3.39727	0.00119253	-2.21902
cg09207718	CYP1A2	0.43615	1.26785	2.50749	0.0147883	-3.38844
cg09214920	SLC25A24	-0.09541	-3.21662	-2.46446	0.016503	-3.4389
cg09216670	PIP4K2A	-0.446218	0.778943	-2.04385	0.0452165	-3.89666
cg09219688	ECHDC3	-0.598751	0.532233	-2.76637	0.00745729	-3.0719
cg09220061	SNTB2	0.14726	-3.18587	2.06177	0.0434221	-3.87854
cg09226986	SLC22A3	0.44057	0.396731	2.15979	0.0346584	-3.77717
cg09229668	CDH23	0.347597	2.17199	2.10664	0.0391963	-3.8326
cg09232564	IFITM5	0.32576	0.638494	2.78407	0.00710567	-3.04949
cg09260773	TBX15	-0.462742	-1.09818	-2.07836	0.0418153	-3.86164
cg09267324	MRC2	0.405732	-4.13834	2.65811	0.00998008	-3.20692
cg09268545	ZNF45	0.138984	2.92021	2.23796	0.0288202	-3.69366
cg09276739	BAT2	0.134914	-3.12442	2.40824	0.019012	-3.50386
cg09276998	SVIL	-0.53359	-1.78288	-2.29291	0.0252525	-3.63357
cg09289202	STK25	-0.961492	-0.318539	-2.36266	0.0212915	-3.5557
cg09298818	PPP1CC	0.413514	-1.27221	2.41812	0.0185479	-3.49252
cg09313931	ZC3H12D	-0.510652	-0.334468	-2.01595	0.0481379	-3.92462
cg09316954	RLTPR	0.524726	-0.272203	2.19058	0.0322453	-3.74455
cg09317036	GSDMD	0.466679	-3.99336	2.05248	0.0443444	-3.88795
cg09319828	TTC24	-0.547766	1.96874	-2.07092	0.0425297	-3.86924
cg09327358	NSMCE1	0.350136	-1.0709	2.09607	0.0401584	-3.8435
cg09327553	LOC651250	-0.0979179	2.67621	-2.15141	0.0353418	-3.78598
cg09338251	FOXF1	-0.391725	-0.190021	-2.74839	0.00783099	-3.09458
cg09356750	DPP9	-0.128795	3.05412	-2.04146	0.0454599	-3.89906
cg09357822	FKBPL	-0.0926152	-3.56147	-2.24742	0.028176	-3.68339
cg09359103	KCNN3	0.358422	-0.829914	2.61556	0.0111688	-3.25896
cg09360748	ARG2	-0.0922372	-4.53692	-2.07681	0.0419631	-3.86323
cg09368875	HBXIP	0.190217	-1.19539	2.02754	0.0469047	-3.91304
cg09370982	TBC1D24	0.375706	0.0913087	2.10191	0.0396248	-3.83749
cg09382002	GRID2IP	-0.281654	2.63733	-2.02154	0.0475397	-3.91904
cg09405227	CCBP2	0.373547	1.84618	2.00522	0.0493035	-3.93529
cg09434603	SLC9A3	0.804444	1.16302	2.26875	0.02677	-3.66013
cg09436190	MORC1	0.610838	3.53924	2.16008	0.0346352	-3.77686
cg09438075	ENOX1	0.3079	0.578292	2.02578	0.0470904	-3.91481
cg09439002	TRPM1	-0.333428	2.95731	-2.26711	0.0268756	-3.66192
cg09446127	UBAC1	0.129416	-3.42228	2.79655	0.00686677	-3.03362
cg09447834	C16orf90	0.211406	1.89324	2.52749	0.0140477	-3.36478
cg09452911	ANTXR1	-0.295757	2.77065	-2.12624	0.0374665	-3.81229
cg09456340	ADAMTS16	0.529921	2.01757	2.07591	0.04205	-3.86415
cg09461005	PARD3	-0.36784	1.52521	-2.27376	0.0264485	-3.65463
cg09464194	FBXO27	0.391712	-2.73054	2.03196	0.0464419	-3.90861
cg09468285	CR1L	0.318855	1.52816	2.43681	0.0176972	-3.47099
cg09469033	SLC30A6	0.0986937	-3.27128	2.02253	0.0474346	-3.91806
cg09473763	SLC35A5	0.303188	3.07333	2.57448	0.0124374	-3.30864
cg09475324	FICD	0.11396	-3.642	2.00388	0.0494509	-3.93662
cg09475757	NEIL3	-0.0994089	-2.31508	-2.65033	0.0101883	-3.21648
cg09488502	SIGLEC5	0.376545	-0.326049	2.55194	0.0131877	-3.33566
cg09491104	C22orf40	0.273829	-1.06164	2.02998	0.0466487	-3.9106
cg09494546	SLC16A4	0.556773	1.00538	2.33033	0.0230531	-3.59202
cg09494672	ZNF536	0.497974	0.852353	2.0675	0.0428612	-3.87272
cg09500002	NWD1	-0.23313	3.16257	-2.00547	0.0492756	-3.93504
cg09504571	MRPL28	0.236723	-2.08513	3.09619	0.00294045	-2.63912
cg09507697	TSGA14	-0.289906	2.63061	-2.1502	0.0354411	-3.78725
cg09510698	HLA-DPB2	0.804521	1.03579	2.19076	0.0322317	-3.74436
cg09510979	FAM20B	0.572432	2.45465	2.07262	0.0423652	-3.8675
cg09514401	TRPA1	0.294493	-1.84028	2.04246	0.045358	-3.89806
cg09517010	ARAP1	-0.196701	2.428	-2.49402	0.0153071	-3.40431
cg09518195	LRP5	-0.231443	1.6468	-2.04877	0.0447168	-3.89169
cg09520904	CCND1	-0.352544	0.0677754	-3.39222	0.00121119	-2.22624
cg09537107	GRIN2D	0.197004	-4.18999	2.44084	0.0175184	-3.46633
cg09539739	LONP2	0.429572	0.144043	2.20933	0.0308496	-3.72452
cg09543474	CNOT6	0.0983169	3.61104	2.23672	0.0289057	-3.695
cg09544380	PTCHD3	0.601292	2.10009	2.6083	0.0113842	-3.26778
cg09547756	PIP5K1C	-0.330484	-0.0292546	-2.00327	0.0495177	-3.93722
cg09554300	TMEM9	0.378945	-2.68544	2.07509	0.0421285	-3.86499
cg09554856	LMO2	-0.315091	0.491939	-2.53469	0.0137892	-3.35622
cg09555118	NRN1	-0.459898	-1.17655	-2.02588	0.0470794	-3.9147
cg09555360	NOC2L	-0.135428	2.54303	-2.29397	0.0251878	-3.6324
cg09558982	APOA1	-0.49937	0.361411	-2.25066	0.027958	-3.67987
cg09565397	DGAT1	0.343741	0.30033	2.09471	0.0402833	-3.84489
cg09567644	SOCS1	0.121385	-3.13058	2.18957	0.032322	-3.74563
cg09574618	C1QTNF2	0.25137	-1.34327	2.54711	0.0133537	-3.34143
cg09613494	SIK1	0.0917291	-4.14263	2.39515	0.0196435	-3.51883
cg09615821	VAC14	0.375863	0.297413	2.12429	0.0376354	-3.81432
cg09631939	TAF4	-0.195705	3.15535	-2.68133	0.00938092	-3.17827
cg09636525	TADA2B	-0.320041	2.22757	-2.433	0.0178679	-3.47539
cg09649245	ALX4	0.169096	-2.74239	3.01498	0.00371934	-2.74853
cg09650134	ADAP1	0.281538	1.14108	2.05259	0.0443328	-3.88783
cg09659163	LRP1	-0.211128	2.13152	-2.18549	0.0326337	-3.74997
cg09665325	XRN2	0.320778	-1.48233	2.61578	0.0111622	-3.25869
cg09668400	SHISA2	0.321829	-2.13922	2.09418	0.040332	-3.84543
cg09671258	LHX4	-0.75197	-0.858169	-2.03293	0.0463409	-3.90764
cg09672032	SLC5A1	-0.203545	2.37061	-2.20101	0.0314624	-3.73343
cg09682272	SEC63	0.652949	1.7558	2.76218	0.00754292	-3.0772
cg09692492	ZDHHC8P	0.25376	-1.79768	2.5942	0.011813	-3.28486
cg09696411	SLC26A10	-0.291957	-0.107892	-2.8452	0.00600488	-2.97133
cg09696653	CAMTA1	0.320149	-3.80261	2.46457	0.0164984	-3.43877
cg09735190	CHTF18	0.253598	2.85038	2.03451	0.0461764	-3.90605
cg09737845	CHST13	0.398489	-3.93904	2.18867	0.0323908	-3.74659
cg09739413	HLA-DQB2	-0.449479	1.3952	-2.34013	0.022506	-3.58105
cg09739904	PAH	0.262012	-0.876744	2.14881	0.0355561	-3.78871
cg09744448	ADAM19	-0.4359	0.00262063	-2.03469	0.0461574	-3.90587
cg09744966	KLF13	-0.278636	2.82629	-2.35599	0.0216448	-3.56322
cg09759260	ITGA2	0.0982936	-3.43079	2.23962	0.0287061	-3.69186
cg09774007	RFX4	-0.450933	-1.4419	-2.15382	0.035144	-3.78345
cg09784724	UBE2J1	-0.118149	3.18476	-2.33538	0.0227695	-3.58636
cg09793700	RAET1G	0.164803	-3.60962	2.48145	0.0158058	-3.41906
cg09795081	RPS10	0.467427	1.06205	2.01326	0.0484272	-3.92729
cg09795550	ZNF804B	0.160682	0.408322	2.86293	0.00571629	-2.94844
cg09795688	LOC283267	-0.522105	2.20137	-2.16145	0.0345241	-3.77541
cg09816500	OPRK1	0.341278	-2.23113	2.39055	0.0198695	-3.52407
cg09829164	RADIL	0.618209	1.17963	2.2509	0.027942	-3.67961
cg09854775	RNU6ATAC	0.12988	-3.11026	2.71324	0.00861148	-3.13862
cg09872392	PHKG1	0.399764	0.102038	2.40783	0.0190315	-3.50432
cg09888572	YPEL2	0.238792	1.40452	2.52165	0.0142603	-3.3717
cg09892131	ZBTB9	-0.0857512	-3.23228	-2.01572	0.0481621	-3.92485
cg09894746	PSMD14	0.0827189	-3.33695	2.01107	0.0486645	-3.92947
cg09895354	SSPO	-0.208792	1.58261	-2.01146	0.0486225	-3.92909
cg09900085	CLPP	0.0957084	-3.00675	2.00859	0.0489347	-3.93194
cg09910207	KERA	0.34472	1.29063	2.07441	0.0421938	-3.86568
cg09917783	ZZEF1	-0.190426	2.71927	-2.09532	0.0402272	-3.84427
cg09920145	TMF1	0.0700355	-4.03348	2.11825	0.0381633	-3.82059
cg09922117	C12orf73	-0.134453	-3.38022	-2.89489	0.0052284	-2.90697
cg09927651	ABR	0.435628	-0.199139	2.2087	0.0308954	-3.72519
cg09930496	H2AFY2	0.227078	-2.80829	2.14304	0.0360359	-3.79475
cg09938518	RIMKLA	0.395369	2.04015	2.72411	0.00836286	-3.12505
cg09941713	CHD7	-0.534125	0.245091	-2.5515	0.0132027	-3.33619
cg09958192	PSKH1	0.358618	0.308279	2.36468	0.0211858	-3.55342
cg09966455	COL20A1	0.624905	1.18333	2.06376	0.0432259	-3.87651
cg09968723	BAI1	-0.529918	-0.888614	-2.02283	0.0474024	-3.91775
cg09980622	BOLA1	0.529525	-3.26236	2.91965	0.00487718	-2.87464
cg09981029	PSKH1	-0.103757	3.14143	-2.16292	0.034406	-3.77387
cg09984602	RORA	0.369619	1.49747	2.05866	0.0437287	-3.88169
cg09989632	AGAP3	-0.0930383	2.4498	-2.41343	0.0187671	-3.49791
cg09998151	AKAP6	1.06121	-1.58803	2.27619	0.0262943	-3.65197
cg09998451	RAB3A	-0.18134	4.06108	-2.48403	0.0157021	-3.41603
cg09999109	OPRK1	0.327832	-3.08669	2.16483	0.0342526	-3.77185
cg10002066	RASA3	-0.275574	-0.422326	-2.15581	0.0349815	-3.78136
cg10013142	ZFYVE21	0.435713	0.876143	2.6192	0.0110624	-3.25453
cg10015051	CDH11	0.394218	1.99498	2.02807	0.0468491	-3.91251
cg10018802	ZNF646	0.337794	2.52303	2.0098	0.0488032	-3.93074
cg10021819	PLCG2	-0.345895	-0.241935	-2.27088	0.026633	-3.6578
cg10026495	SHROOM3	-0.169705	2.18131	-2.102	0.0396164	-3.83739
cg10028884	PER1	-0.627568	-1.39608	-2.03538	0.0460869	-3.90519
cg10030980	CACNA2D1	0.439369	1.56167	2.00298	0.0495499	-3.93751
cg10035469	SEMA3A	0.210596	-2.9788	2.07076	0.0425446	-3.8694
cg10037913	NSMCE1	-0.331349	-1.41402	-2.04515	0.0450837	-3.89535
cg10038168	ZNF664	-0.130363	2.63491	-2.1494	0.0355072	-3.78809
cg10053622	DNAH2	0.253291	-0.036806	2.47179	0.0161988	-3.43035
cg10062193	ATP10D	-0.525508	-0.401323	-2.37159	0.0208266	-3.5456
cg10069121	S100A11	0.371908	-1.4367	2.58887	0.0119789	-3.2913
cg10088790	GSTO2	0.32477	-1.71427	2.16909	0.0339131	-3.76735
cg10089963	NR4A2	-0.232308	2.39126	-2.05629	0.0439638	-3.88409
cg10090861	TXNDC11	-0.117736	2.90336	-2.11447	0.0384972	-3.82451
cg10096215	DPEP2	-0.423499	0.43083	-2.51953	0.0143383	-3.37421
cg10096796	FAM48B2	0.155768	1.82223	2.1991	0.0316045	-3.73547
cg10105718	WDR60	-0.219114	2.83626	-2.10592	0.0392612	-3.83334
cg10106965	IRAK2	0.24794	-1.03273	2.03594	0.0460288	-3.90462
cg10110957	ANKRD11	0.220771	1.19612	2.12824	0.0372938	-3.81021
cg10122690	CEBPZ	-0.108435	3.39794	-2.07063	0.0425577	-3.86953
cg10125703	RASIP1	-0.423095	-1.43301	-2.15278	0.0352294	-3.78454
cg10131891	CBFA2T3	0.400516	1.15945	2.08003	0.0416571	-3.85994
cg10131972	TXNRD2	-0.593116	-1.4173	-3.14976	0.00251322	-2.56601
cg10134204	FUCA2	0.110092	3.13715	2.17751	0.0332514	-3.75845
cg10136168	POMT2	0.311748	0.194321	2.17857	0.0331688	-3.75732
cg10142141	PMS2L4	-0.189029	1.68064	-2.49776	0.0151614	-3.39991
cg10158182	NOTCH4	0.479045	0.678602	2.76225	0.0075414	-3.07711
cg10159630	HOXD3	-0.40829	0.522397	-2.26274	0.0271595	-3.6667
cg10165162	PROX2	0.434601	2.10316	2.4463	0.0172792	-3.46001
cg10168894	RAB21	0.262789	-2.25087	2.10426	0.039411	-3.83506
cg10170678	RIN3	-0.278947	2.44508	-2.25494	0.0276732	-3.67521
cg10173124	CYP27C1	-0.273374	1.73463	-2.1895	0.0323278	-3.74571
cg10187674	ABCA5	0.466115	-1.79473	2.6451	0.0103306	-3.22289
cg10190813	HUS1	0.148882	-2.46312	2.04972	0.0446219	-3.89074
cg10206594	GRIK3	0.408067	0.908896	2.61211	0.0112707	-3.26315
cg10212457	WDR37	-0.119442	3.48664	-2.35867	0.0215024	-3.5602
cg10231067	IFFO2	-0.468995	0.247316	-2.37295	0.0207568	-3.54406
cg10233599	MYH3	0.425099	2.44885	2.36179	0.0213376	-3.55669
cg10240496	LOC646762	0.141402	-2.1174	2.03681	0.0459389	-3.90375
cg10240950	C12orf76	1.02491	1.5969	2.18988	0.0322989	-3.7453
cg10242089	LOC441046	0.566722	-3.61423	2.41248	0.0188117	-3.499
cg10242724	ARHGAP22	0.411163	-3.18821	2.10306	0.0395202	-3.8363
cg10259701	KLF13	-0.646892	-1.73247	-2.11201	0.0387154	-3.82705
cg10262891	GRIN2D	0.267408	0.632383	2.05866	0.0437284	-3.88169
cg10277927	TRAM1L1	0.322635	-2.47932	2.21054	0.0307613	-3.72322
cg10277956	SLC16A14	0.293629	2.11746	2.15597	0.0349682	-3.78118
cg10282845	PPTC7	0.259415	2.09503	2.02062	0.0476377	-3.91996
cg10289744	CHL1	0.517484	1.27405	2.29517	0.0251146	-3.63107
cg10310299	JMJD1C	-0.110715	2.33802	-2.2313	0.0292814	-3.70086
cg10319893	C13orf36	-0.353833	-1.56735	-2.42563	0.0182018	-3.48389
cg10332787	C14orf106	0.272662	-3.54019	2.05841	0.0437535	-3.88195
cg10346758	CERK	0.0794296	5.09227	2.03098	0.0465439	-3.90959
cg10349919	GAK	0.120757	3.52539	2.2612	0.0272602	-3.66838
cg10374862	MTERF	0.18198	-3.52877	2.38718	0.0200368	-3.52791
cg10378631	LRBA	-0.0959289	-2.56727	-2.23287	0.0291718	-3.69916
cg10380221	ZNF668	-0.28311	0.113406	-3.13013	0.00266254	-2.59289
cg10381813	C1orf170	0.393962	-0.233747	2.70478	0.00880954	-3.14916
cg10385208	CCDC49	0.315313	0.349174	2.19505	0.0319079	-3.73979
cg10402417	TBC1D10C	-0.369621	0.494388	-2.16124	0.0345416	-3.77564
cg10406538	WSCD1	0.594786	1.52591	2.25072	0.0279541	-3.6798
cg10410146	POLM	0.334974	0.0612127	2.1247	0.0375995	-3.81389
cg10415442	ST18	0.535086	1.94527	2.08728	0.0409736	-3.85252
cg10417559	PRICKLE3	0.388808	1.60447	2.28895	0.0254963	-3.63794
cg10421247	CCDC64	0.388507	-3.05397	2.32723	0.0232286	-3.59548
cg10425245	SLIT3	-0.376164	0.0204202	-2.1161	0.0383532	-3.82282
cg10430205	GTF2B	0.521247	1.01205	2.50855	0.0147484	-3.3872
cg10430904	LOC400752	0.133641	-3.75007	3.0078	0.00379666	-2.75811
cg10438575	HRK	0.288757	-2.66787	2.09874	0.0399137	-3.84075
cg10452248	ANKRD11	0.18004	3.74289	2.21685	0.0303045	-3.71644
cg10453977	EXOC6B	0.196828	-2.12994	2.22715	0.0295718	-3.70534
cg10457446	SPNS2	0.451934	0.81142	2.02759	0.0468994	-3.91299
cg10461088	ARFGAP2	-0.107266	-4.00505	-2.55687	0.0130201	-3.32977
cg10479053	PSMD3	-0.0965113	-3.27824	-2.15971	0.034665	-3.77725
cg10486974	PACSIN1	-0.402906	2.05143	-2.09583	0.0401802	-3.84374
cg10489124	TMEM216	0.453972	-2.5541	2.41232	0.0188193	-3.49919
cg10489986	TRNP1	0.237745	-4.27483	2.08635	0.0410612	-3.85348
cg10491652	MEX3A	0.0944839	-3.47431	2.62364	0.0109337	-3.24913
cg10493055	TSPAN5	-0.388827	1.45642	-2.54252	0.013513	-3.3469
cg10494556	ZFAND2A	0.0988111	-4.78285	2.13649	0.0365882	-3.80161
cg10496614	C4orf44	0.133816	4.84392	2.19361	0.0320164	-3.74133
cg10496619	MTHFD1L	-0.348516	2.13276	-2.05106	0.0444864	-3.88938
cg10498097	C2orf62	0.397147	2.06743	2.0472	0.0448759	-3.89328
cg10501621	IRGM	0.408042	1.77297	2.2742	0.0264209	-3.65416
cg10511988	VAX1	-0.593285	0.119453	-2.38768	0.0200116	-3.52733
cg10515332	C4orf37	0.301251	-3.82823	2.21286	0.0305924	-3.72072
cg10515753	MEX3A	0.179844	-3.14696	2.06146	0.0434527	-3.87886
cg10529387	BOC	0.577238	-3.16462	2.68628	0.00925759	-3.17214
cg10534672	C1QTNF2	0.184429	-2.31959	2.06315	0.0432859	-3.87714
cg10536076	HAPLN1	0.158139	-3.5475	2.22126	0.0299887	-3.71169
cg10539861	ENTPD7	0.432885	-2.84395	2.02996	0.0466504	-3.91061
cg10540754	FAM49A	-0.0979474	-3.54798	-2.023	0.0473845	-3.91759
cg10541843	PPP1R13B	0.353724	0.427996	2.13765	0.0364896	-3.80039
cg10546487	CLIC4	0.504299	0.946594	2.27178	0.026575	-3.6568
cg10549753	MIR492	0.422062	-0.0773088	2.02629	0.0470366	-3.9143
cg10553103	PCDHB19P	-0.540248	0.410859	-2.60806	0.0113911	-3.26806
cg10575846	PTDSS2	-0.162129	3.19701	-3.44715	0.00102224	-2.14738
cg10576245	PCNXL2	0.400271	-0.967078	2.22146	0.0299746	-3.71148
cg10576725	MMP14	0.248914	-3.23903	2.23304	0.0291599	-3.69898
cg10586510	SMO	0.241212	-2.07729	2.38308	0.020242	-3.53257
cg10593480	EIF1AY	-0.0909597	-0.159336	-2.12423	0.0376407	-3.81438
cg10596925	MAP2K4	0.21501	-2.63972	2.70578	0.00878592	-3.14792
cg10603481	GALNT9	0.303365	0.485767	2.33784	0.0226327	-3.58361
[truncated: 2,830 more rows]
